# Supplementary material for: PERK/ATF4-Dependent ZFAS1 Upregulation Is Associated with Sorafenib Resistance in Hepatocellular Carcinoma Cells
Source: MDPI journal article supplement (doi:10.3390/ijms22115848), 2021-05-29
Supplement: s1 [file s1]

**Table S1.** The differentially expressed genes in sorafenib-treated HCC cells. HepG2, HepG2-SR, and PLC5 cells were treated with 5  $\mu$ M sorafenib for 24 h, and then total RNAs were analyzed by the RNA-sequencing (RNA-Seq). The differentially expressed genes (DEGs) with absolute log2 fold-change ratio more than 1 were shown.

| HepG2        |           | HepG2-SR   |           | PLC5         |           |
|--------------|-----------|------------|-----------|--------------|-----------|
| Up           | Down      | Up         | Down      | Up           | Down      |
| RNU6-2       | HSPA5     | U2AF1L5    | CCL20     | FAM129A      | HNRNPA1   |
| RNU6-9       | AFP       | CAPN3      | LYZ       | AKNA         | CXCL16    |
| CSNK2A3      | PCNA      | NUPR1      | CSE1L     | ALDH1L2      | CXCL5     |
| NUPR1        | MAGED1    | JDP2       | MATN3     | GADD45A      | STMN1     |
| CAPN3        | BMP4      | BEX2       | TMSB10    | GAS5         | PGAM1     |
| ADGRG1       | LDHA      | ASNS       | HMGA1     | TRIB3        | TFRC      |
| DPEP1        | PEG3-AS1  | SLC6A9     | RNU6-1    | ZFAS1        | TESC      |
| ABCC3        | PGK1      | TRIM50     | UBE2C     | LOC642423    | NTS       |
| CYP4F12      | INSIG2    | DDIT3      | BHLHE40   | SLC22A15     | CD24      |
| HAMP         | TGFB2     | INHBE      | TUBA1C    | LAMP3        | MARCKSL1  |
| GSTA1        | PET100    | SLC17A2    | SAA4      | BEX2         | HNRNPM    |
| DIO1         | IL1RN     | MTHFD2     | UHRF1     | NUPR1        | FGA       |
| SERPINC1     | CKB       | TRIB3      | GIN52     | PABPC1L      | MAGEA4    |
| COL16A1      | APOM      | GPAM       | IGFBP1    | INHBE        | RPL36A-   |
| SLC22A7      | SERPINA11 | CEBPB      | TUBA1B    | MSTO2P       | HNRNPH2   |
| HKDC1        | PLOD2     | SHBG       | S100A6    | CLGN         | TGFB2     |
| ETNK2        | SLC6A8    | SAT2       | MYBL2     | HSPA1B       | BLOC1S1   |
| ANGPTL8      | SAA4      | CBS        | SLC25A10  | PCK2         | ALDOA     |
| ENO3         | C17orf96  | IFRD1      | C8orf4    | PPP1R15A     | TUBB4B    |
| GPD1         | BNIP3L    | ARL2-SNX15 | LOC729083 | TUBE1        | AURKA     |
| GTF2IRD1     | RNU6-1    | A1BG       | LGALS3    | SLC3A2       | BNIP3     |
| CES1         | C5        | NR1H4      | UBE2T     | C6orf48      | KIAA0101  |
| KHDRBS3      | SEC61G    | CCPG1      | ZWINT     | PHGDH        | MAP3K8    |
| ASS1         | ERRFI1    | PCSK9      | MKI67     | ANKRD1       | PPP2R1B   |
| UNC13D       | HNRNPA2B1 | INPP1      | CTGF      | SNHG15       | NR2F2     |
| PPDPF        | SLC38A2   | CEBPG      | S100A11   | SLC1A4       | CCL20     |
| SAT2         | NDRG1     | SNHG8      | IER3      | ABLM3        | PGK1      |
| PRAP1        | HSD17B2   | CYP4F12    | G6PC3     | HSPA1A       | HMGB3     |
| ITPKA        | CP        | PHGDH      | RRM2      | ARHGEF2      | H2AFX     |
| SMIM24       | ACSL4     | GAS5       | RNU6-2    | NPIPA1       | NUSAP1    |
| SNHG1        | TGFB3     | SARS       | RNU6-9    | LHPP         | RDH10     |
| MTSS1L       | AKAP12    | ASS1       | LGALS1    | TCEA1        | DHRS3     |
| INHBE        | DUSP6     | YARS       | FEN1      | ATF3         | SFPQ      |
| LOC102724652 | THBS1     | MARS       | CITED2    | HKDC1        | SLC2A3    |
| AARS         | RAB42     | SHMT2      | CEMIP     | U2AF1L4      | LDHA      |
| FAM3B        | PEG10     | RN7SL2     | MIXL1     | CCNB1IP1     | C1GALT1C1 |
| SIAH2        | RRM2      | HULC       | ANKRD1    | WARS         | PCNA-AS1  |
| DGAT2        | CCL15     | SERPINC1   | TK1       | AKR1C2       | IDI1      |
| SEMA3B       | FILIP1L   | XPOT       | JUN       | ANXA3        | AFP       |
| ASNS         | C8orf4    | AKR1C2     | CDC45     | AKR1C1       | NR4A2     |
| CHCHD10      | LYZ       | ZFAS1      | SFN       | SNHG8        | SCD       |
| DCXR         | LCN15     | SNHG19     | SH3BGRL3  | ASNS         | PCDH9     |
| TCEA3        | SERPINA3  | MAP1LC3B   | PCK1      | ALDH2        | PDK4      |
| SMARCB1      | PFKFB4    | SNHG7      | THBS1     | ZRSR2        | TP53INP2  |
|              | EGR1      | BRI3       | KRT23     | CHCHD10      | CXCL12    |
|              | MATN3     | ASAHI      | ZFP36     | SARS         | ERO1A     |
|              | C10orf10  | ATF4       | MT2A      | CEBPG        | FST       |
|              | FST       | LINC01623  | CDC6      | EIF4EBP1     | CXCL1     |
|              | CTGF      | SNHG5      | NME1-NME2 | LOC100288162 | MUC13     |
|              | SLC2A3    |            | TIMP1     | THAP9-AS1    | IGFBP3    |

|         |               |               |              |
|---------|---------------|---------------|--------------|
| TUBB1   | TAGLN         | PKD1P6-NPIPP1 | ADGRL2       |
| IGFBP3  | AKAP12        | ZFAND1        | FGB          |
| LOX     | DUSP1         | PSAT1         | DLGAP1-AS1   |
| CA9     | ADM           | MTRNR2L9      | AHSG         |
| CCL20   | CYR61         | TES           | PLIN2        |
| SLC6A14 | EGR1          | TAF1D         | CGA          |
| IGFBP1  | SNX15         | DDIT3         | CP           |
| EDN1    | BCYRN1        | GARS          | SSX2         |
|         | FOS           | LRRC75A-AS1   | RRM2         |
|         | VTRNA1-2      | RP9           | FUT11        |
|         | SLX1B-SULT1A4 | MTRNR2L10     | KIF20A       |
|         |               | ZFAND2A       | ALB          |
|         |               | MTRNR2L6      | C4orf3       |
|         |               | SHMT2         | AGTR1        |
|         |               | SNHG5         | SPTSSB       |
|         |               | SNHG6         | PLOD2        |
|         |               | MTHFD2        | TM4SF4       |
|         |               | MTRNR2L1      | IGFBP1       |
|         |               | GFPT1         | CRH          |
|         |               | TSEN15        | LINC00473    |
|         |               | YARS          | FABP1        |
|         |               | MARS          | DRAIC        |
|         |               | HERPUD1       | EGR1         |
|         |               | MTRNR2L8      | H19          |
|         |               | PYCR1         | HOTS         |
|         |               | RPL12         | ADM          |
|         |               | SAT1          | HILPDA       |
|         |               | IDH1          | CITED2       |
|         |               |               | LOC101929767 |
|         |               |               | ALDOC        |
|         |               |               | ANGPTL4      |
|         |               |               | BNIP3L       |
|         |               |               | SLC1A6       |
|         |               |               | FAM13A       |
|         |               |               | PFKFB4       |
|         |               |               | INSIG1       |
|         |               |               | CYP26A1      |
|         |               |               | CA9          |
|         |               |               | NDRG1        |
|         |               |               | ANKRD37      |
|         |               |               | HAL          |

**Table S2.** The ZFAS1-associated genes in TCGA-LIHC data set. Over- and under-expressed genes in ZFAS1-high-expressing HCC patients were obtained from the cBioPortal website using the “Comparison” tool.

| Gene      | Log Ratio | p-Value  | q-Value  | Tendency       |
|-----------|-----------|----------|----------|----------------|
| SPHK1     | 2.48      | 3.75E-10 | 7.51E-09 | Over-expressed |
| PDE9A     | 2.17      | 4.06E-12 | 1.54E-10 | Over-expressed |
| PYCR1     | 2.11      | 2.12E-07 | 1.70E-06 | Over-expressed |
| MMP9      | 2.1       | 2.26E-12 | 9.52E-11 | Over-expressed |
| LSP1P5    | 2.08      | 1.95E-12 | 8.43E-11 | Over-expressed |
| ZFAS1     | 2.05      | 5.18E-40 | 6.24E-36 | Over-expressed |
| TESC      | 1.99      | 1.16E-07 | 1.01E-06 | Over-expressed |
| SNHG6     | 1.93      | 4.28E-23 | 5.42E-20 | Over-expressed |
| SLC39A4   | 1.93      | 2.89E-06 | 1.59E-05 | Over-expressed |
| LSP1P4    | 1.91      | 6.09E-16 | 6.33E-14 | Over-expressed |
| SNHG3     | 1.88      | 1.33E-17 | 2.29E-15 | Over-expressed |
| GAS5      | 1.84      | 2.37E-26 | 1.43E-22 | Over-expressed |
| MFSD2B    | 1.81      | 3.14E-18 | 7.27E-16 | Over-expressed |
| H2AFY2    | 1.81      | 7.46E-09 | 9.57E-08 | Over-expressed |
| TMSB10    | 1.79      | 5.22E-16 | 5.57E-14 | Over-expressed |
| GGTLC2    | 1.77      | 1.07E-07 | 9.45E-07 | Over-expressed |
| MEG3      | 1.77      | 2.22E-05 | 9.40E-05 | Over-expressed |
| MAPK13    | 1.76      | 6.54E-08 | 6.18E-07 | Over-expressed |
| TRNP1     | 1.76      | 8.71E-08 | 7.95E-07 | Over-expressed |
| NAT14     | 1.73      | 2.92E-15 | 2.65E-13 | Over-expressed |
| PSMC3IP   | 1.72      | 5.60E-13 | 2.79E-11 | Over-expressed |
| SH2D3A    | 1.72      | 6.96E-09 | 9.01E-08 | Over-expressed |
| SLC29A4   | 1.71      | 1.43E-05 | 6.39E-05 | Over-expressed |
| NMB       | 1.66      | 1.31E-17 | 2.29E-15 | Over-expressed |
| ANKRD19P  | 1.66      | 2.04E-14 | 1.61E-12 | Over-expressed |
| MDK       | 1.65      | 1.79E-09 | 2.79E-08 | Over-expressed |
| RPL8      | 1.64      | 1.89E-18 | 4.84E-16 | Over-expressed |
| RPL39     | 1.63      | 1.83E-16 | 2.22E-14 | Over-expressed |
| AURKB     | 1.63      | 3.79E-11 | 1.09E-09 | Over-expressed |
| BIRC5     | 1.63      | 3.56E-10 | 7.15E-09 | Over-expressed |
| RPL13AP20 | 1.61      | 1.55E-17 | 2.58E-15 | Over-expressed |
| SLC6A8    | 1.6       | 1.72E-07 | 1.43E-06 | Over-expressed |
| SPP1      | 1.59      | 8.81E-04 | 2.33E-03 | Over-expressed |
| CYTOR     | 1.57      | 7.33E-14 | 5.02E-12 | Over-expressed |
| TMEM74B   | 1.57      | 4.01E-10 | 7.96E-09 | Over-expressed |
| TMED3     | 1.57      | 2.07E-07 | 1.66E-06 | Over-expressed |
| RPS21     | 1.55      | 5.32E-20 | 2.67E-17 | Over-expressed |
| RPS19     | 1.55      | 3.58E-19 | 1.31E-16 | Over-expressed |
| ZNF296    | 1.55      | 6.28E-09 | 8.24E-08 | Over-expressed |
| ASNS      | 1.55      | 6.72E-08 | 6.33E-07 | Over-expressed |
| SNHG29    | 1.52      | 2.67E-21 | 1.89E-18 | Over-expressed |
| PRR7      | 1.52      | 1.59E-13 | 9.92E-12 | Over-expressed |
| SNHG5     | 1.51      | 2.97E-13 | 1.70E-11 | Over-expressed |
| PAFAH1B3  | 1.51      | 1.07E-11 | 3.60E-10 | Over-expressed |
| CYBA      | 1.5       | 2.16E-08 | 2.40E-07 | Over-expressed |
| LTB       | 1.5       | 5.71E-08 | 5.49E-07 | Over-expressed |
| MYBL2     | 1.5       | 1.83E-07 | 1.50E-06 | Over-expressed |
| LRRC1     | 1.49      | 2.45E-09 | 3.67E-08 | Over-expressed |
| DNM1      | 1.49      | 1.33E-06 | 8.11E-06 | Over-expressed |
| RPS28     | 1.49      | 9.02E-04 | 2.38E-03 | Over-expressed |
| RPL13AP3  | 1.48      | 5.86E-13 | 2.87E-11 | Over-expressed |
| MAFG-DT   | 1.48      | 1.63E-10 | 3.71E-09 | Over-expressed |

|              |      |          |          |                |
|--------------|------|----------|----------|----------------|
| UBD          | 1.48 | 1.64E-08 | 1.88E-07 | Over-expressed |
| RAB34        | 1.48 | 4.52E-06 | 2.35E-05 | Over-expressed |
| RPL37A       | 1.47 | 3.34E-21 | 2.24E-18 | Over-expressed |
| RPL23A       | 1.47 | 8.48E-20 | 3.78E-17 | Over-expressed |
| RPL28        | 1.47 | 4.11E-19 | 1.46E-16 | Over-expressed |
| PTTG1        | 1.46 | 2.70E-11 | 8.15E-10 | Over-expressed |
| SAPCD2       | 1.46 | 4.75E-09 | 6.50E-08 | Over-expressed |
| RPLP2        | 1.45 | 9.25E-19 | 2.59E-16 | Over-expressed |
| RPS24        | 1.44 | 1.24E-23 | 3.00E-20 | Over-expressed |
| LINC02381    | 1.44 | 1.52E-04 | 5.05E-04 | Over-expressed |
| CD7          | 1.43 | 9.50E-06 | 4.49E-05 | Over-expressed |
| GNAZ         | 1.42 | 6.33E-08 | 6.00E-07 | Over-expressed |
| RPL26        | 1.41 | 9.94E-22 | 7.98E-19 | Over-expressed |
| RPL27A       | 1.41 | 2.60E-19 | 1.03E-16 | Over-expressed |
| RPS12        | 1.41 | 6.98E-17 | 9.34E-15 | Over-expressed |
| SNHG7        | 1.41 | 6.04E-15 | 5.27E-13 | Over-expressed |
| HMGA1        | 1.41 | 3.28E-14 | 2.46E-12 | Over-expressed |
| DBN1         | 1.41 | 1.18E-08 | 1.41E-07 | Over-expressed |
| UBE2C        | 1.41 | 1.51E-08 | 1.75E-07 | Over-expressed |
| RPL13        | 1.4  | 1.95E-16 | 2.32E-14 | Over-expressed |
| MSS51        | 1.4  | 1.96E-16 | 2.32E-14 | Over-expressed |
| TEAD4        | 1.4  | 2.23E-08 | 2.48E-07 | Over-expressed |
| RPS20        | 1.39 | 3.66E-17 | 5.45E-15 | Over-expressed |
| KCTD17       | 1.39 | 4.54E-08 | 4.52E-07 | Over-expressed |
| NQO1         | 1.39 | 5.22E-03 | 0.011    | Over-expressed |
| RPS10        | 1.38 | 3.63E-22 | 3.36E-19 | Over-expressed |
| EEF1D        | 1.38 | 1.47E-15 | 1.39E-13 | Over-expressed |
| SH3D21       | 1.38 | 5.02E-13 | 2.55E-11 | Over-expressed |
| S100A6       | 1.38 | 4.52E-07 | 3.24E-06 | Over-expressed |
| RPL36        | 1.37 | 1.34E-15 | 1.28E-13 | Over-expressed |
| NPM3         | 1.37 | 5.51E-13 | 2.76E-11 | Over-expressed |
| PTP4A3       | 1.37 | 2.69E-07 | 2.08E-06 | Over-expressed |
| SLC29A2      | 1.37 | 3.56E-07 | 2.64E-06 | Over-expressed |
| RPSA         | 1.36 | 2.53E-18 | 5.97E-16 | Over-expressed |
| FBL          | 1.36 | 2.85E-16 | 3.21E-14 | Over-expressed |
| SLC16A3      | 1.36 | 1.61E-06 | 9.60E-06 | Over-expressed |
| EPB41L4A-AS1 | 1.35 | 5.77E-24 | 2.32E-20 | Over-expressed |
| RPS17        | 1.35 | 3.06E-23 | 5.42E-20 | Over-expressed |
| RPS2         | 1.35 | 3.15E-23 | 5.42E-20 | Over-expressed |
| ZNF581       | 1.35 | 2.48E-20 | 1.36E-17 | Over-expressed |
| RPL18A       | 1.35 | 1.88E-17 | 2.95E-15 | Over-expressed |
| RPL38        | 1.34 | 3.32E-17 | 5.00E-15 | Over-expressed |
| TYRO3        | 1.34 | 2.03E-05 | 8.69E-05 | Over-expressed |
| KLC3         | 1.34 | 2.19E-05 | 9.28E-05 | Over-expressed |
| RPL37        | 1.33 | 1.49E-20 | 8.54E-18 | Over-expressed |
| C19ORF48     | 1.33 | 7.34E-16 | 7.56E-14 | Over-expressed |
| SELENOM      | 1.33 | 4.05E-06 | 2.14E-05 | Over-expressed |
| GPR35        | 1.33 | 1.46E-04 | 4.88E-04 | Over-expressed |
| RPL35        | 1.32 | 2.30E-16 | 2.65E-14 | Over-expressed |
| RPLP0        | 1.31 | 2.66E-22 | 2.68E-19 | Over-expressed |
| RPL34        | 1.31 | 4.53E-18 | 9.58E-16 | Over-expressed |
| RPL30        | 1.31 | 2.09E-16 | 2.44E-14 | Over-expressed |
| DANCR        | 1.31 | 2.51E-14 | 1.92E-12 | Over-expressed |
| RPL22L1      | 1.31 | 7.16E-11 | 1.86E-09 | Over-expressed |
| TMEM132A     | 1.31 | 2.13E-05 | 9.09E-05 | Over-expressed |
| RPS9         | 1.3  | 5.28E-19 | 1.63E-16 | Over-expressed |
| SYNGR1       | 1.3  | 1.51E-05 | 6.69E-05 | Over-expressed |

|           |      |          |          |                |
|-----------|------|----------|----------|----------------|
| CD24      | 1.3  | 4.80E-04 | 1.38E-03 | Over-expressed |
| RPS8      | 1.29 | 4.29E-23 | 5.42E-20 | Over-expressed |
| RPL32     | 1.29 | 5.41E-19 | 1.63E-16 | Over-expressed |
| RPL18     | 1.29 | 6.39E-18 | 1.24E-15 | Over-expressed |
| SMOX      | 1.29 | 1.72E-09 | 2.71E-08 | Over-expressed |
| RECQL4    | 1.29 | 5.53E-09 | 7.40E-08 | Over-expressed |
| CDC20     | 1.29 | 9.65E-08 | 8.68E-07 | Over-expressed |
| PKIB      | 1.29 | 3.73E-04 | 1.11E-03 | Over-expressed |
| SNHG17    | 1.28 | 4.54E-19 | 1.51E-16 | Over-expressed |
| RPSAP58   | 1.28 | 2.16E-18 | 5.20E-16 | Over-expressed |
| SNHG8     | 1.28 | 7.47E-16 | 7.56E-14 | Over-expressed |
| ENO2      | 1.28 | 1.52E-05 | 6.75E-05 | Over-expressed |
| ARID3A    | 1.28 | 3.23E-05 | 1.30E-04 | Over-expressed |
| RPS27A    | 1.27 | 8.48E-20 | 3.78E-17 | Over-expressed |
| RPS16     | 1.27 | 9.98E-18 | 1.79E-15 | Over-expressed |
| CD3D      | 1.27 | 9.18E-06 | 4.36E-05 | Over-expressed |
| TUBB3     | 1.26 | 4.97E-09 | 6.76E-08 | Over-expressed |
| RPL23     | 1.25 | 5.65E-20 | 2.72E-17 | Over-expressed |
| RPL27     | 1.25 | 1.99E-18 | 4.90E-16 | Over-expressed |
| RPL13A    | 1.25 | 5.90E-18 | 1.23E-15 | Over-expressed |
| RPL14     | 1.25 | 6.38E-18 | 1.24E-15 | Over-expressed |
| RPS5      | 1.25 | 1.88E-15 | 1.76E-13 | Over-expressed |
| HSPB1P1   | 1.25 | 2.62E-11 | 7.93E-10 | Over-expressed |
| SLC1A5    | 1.24 | 2.51E-07 | 1.96E-06 | Over-expressed |
| PHLDA2    | 1.24 | 5.49E-05 | 2.07E-04 | Over-expressed |
| RPS27     | 1.24 | 6.48E-05 | 2.39E-04 | Over-expressed |
| RPL31     | 1.23 | 9.90E-24 | 2.98E-20 | Over-expressed |
| RPS3      | 1.23 | 6.28E-18 | 1.24E-15 | Over-expressed |
| SNHG12    | 1.23 | 4.74E-17 | 6.81E-15 | Over-expressed |
| RPS29     | 1.23 | 4.45E-14 | 3.19E-12 | Over-expressed |
| SNRPD2    | 1.23 | 3.49E-13 | 1.88E-11 | Over-expressed |
| RANGRF    | 1.23 | 9.25E-13 | 4.36E-11 | Over-expressed |
| BGLAP     | 1.23 | 3.52E-10 | 7.09E-09 | Over-expressed |
| WDR54     | 1.23 | 1.46E-08 | 1.71E-07 | Over-expressed |
| TMC6      | 1.23 | 2.35E-07 | 1.84E-06 | Over-expressed |
| SOX4      | 1.23 | 2.60E-07 | 2.02E-06 | Over-expressed |
| RPLP1     | 1.22 | 4.13E-17 | 6.07E-15 | Over-expressed |
| CENPM     | 1.22 | 1.04E-07 | 9.25E-07 | Over-expressed |
| LPAR2     | 1.22 | 1.23E-05 | 5.60E-05 | Over-expressed |
| RPL9      | 1.22 | 4.82E-05 | 1.85E-04 | Over-expressed |
| RPS14     | 1.21 | 1.69E-19 | 7.29E-17 | Over-expressed |
| CLIC1     | 1.21 | 6.11E-18 | 1.24E-15 | Over-expressed |
| RPS15     | 1.21 | 2.31E-16 | 2.65E-14 | Over-expressed |
| EVA1B     | 1.21 | 1.42E-14 | 1.16E-12 | Over-expressed |
| MYL6B     | 1.21 | 9.76E-14 | 6.43E-12 | Over-expressed |
| SELENOW   | 1.21 | 8.08E-09 | 1.02E-07 | Over-expressed |
| EFNA3     | 1.21 | 7.48E-08 | 6.93E-07 | Over-expressed |
| TROAP     | 1.21 | 2.53E-07 | 1.97E-06 | Over-expressed |
| LOC606724 | 1.21 | 5.15E-07 | 3.62E-06 | Over-expressed |
| ISYNA1    | 1.21 | 6.69E-05 | 2.46E-04 | Over-expressed |
| CKB       | 1.21 | 2.48E-04 | 7.75E-04 | Over-expressed |
| CAPG      | 1.2  | 2.02E-08 | 2.26E-07 | Over-expressed |
| RHPN1     | 1.2  | 3.51E-07 | 2.61E-06 | Over-expressed |
| LIMD2     | 1.19 | 1.41E-08 | 1.65E-07 | Over-expressed |
| RPS23     | 1.18 | 1.24E-20 | 7.46E-18 | Over-expressed |
| RPS6      | 1.18 | 8.91E-19 | 2.56E-16 | Over-expressed |
| CDT1      | 1.18 | 3.05E-08 | 3.24E-07 | Over-expressed |

|             |      |          |          |                |
|-------------|------|----------|----------|----------------|
| IPW         | 1.18 | 5.15E-04 | 1.46E-03 | Over-expressed |
| PFDN4       | 1.17 | 4.86E-21 | 3.08E-18 | Over-expressed |
| RPL24       | 1.17 | 3.23E-18 | 7.31E-16 | Over-expressed |
| RPS11       | 1.17 | 1.72E-17 | 2.77E-15 | Over-expressed |
| RPL35A      | 1.17 | 1.75E-17 | 2.78E-15 | Over-expressed |
| CMTM7       | 1.17 | 3.33E-16 | 3.68E-14 | Over-expressed |
| FKBP1B      | 1.17 | 4.73E-04 | 1.36E-03 | Over-expressed |
| RPL12       | 1.16 | 1.21E-18 | 3.17E-16 | Over-expressed |
| TMEM91      | 1.16 | 8.25E-12 | 2.86E-10 | Over-expressed |
| MIR4435-2HG | 1.16 | 4.74E-10 | 9.18E-09 | Over-expressed |
| EXOSC4      | 1.16 | 8.85E-09 | 1.10E-07 | Over-expressed |
| ZP3         | 1.16 | 7.23E-08 | 6.74E-07 | Over-expressed |
| PSTPIP1     | 1.16 | 1.66E-06 | 9.83E-06 | Over-expressed |
| PYCARD      | 1.16 | 2.56E-06 | 1.43E-05 | Over-expressed |
| ADAP1       | 1.16 | 1.34E-04 | 4.55E-04 | Over-expressed |
| RAP1GAP2    | 1.16 | 3.42E-04 | 1.03E-03 | Over-expressed |
| CTHRC1      | 1.16 | 1.33E-03 | 3.34E-03 | Over-expressed |
| RPS7        | 1.15 | 9.75E-19 | 2.67E-16 | Over-expressed |
| RPL41       | 1.15 | 1.56E-17 | 2.58E-15 | Over-expressed |
| SAPCD1      | 1.15 | 1.07E-14 | 8.86E-13 | Over-expressed |
| NUDT1       | 1.15 | 7.15E-11 | 1.86E-09 | Over-expressed |
| LPCAT1      | 1.15 | 2.99E-09 | 4.37E-08 | Over-expressed |
| S100A4      | 1.15 | 8.93E-08 | 8.13E-07 | Over-expressed |
| KIF2C       | 1.15 | 8.76E-07 | 5.71E-06 | Over-expressed |
| RPL4        | 1.14 | 4.02E-22 | 3.46E-19 | Over-expressed |
| RPL7        | 1.14 | 3.28E-13 | 1.80E-11 | Over-expressed |
| TLCD1       | 1.14 | 2.44E-11 | 7.48E-10 | Over-expressed |
| MARCKSL1    | 1.14 | 2.75E-10 | 5.78E-09 | Over-expressed |
| SEMA4A      | 1.14 | 3.97E-09 | 5.58E-08 | Over-expressed |
| PLEKHG4     | 1.14 | 6.17E-04 | 1.71E-03 | Over-expressed |
| C20ORF204   | 1.14 | 5.23E-03 | 0.011    | Over-expressed |
| RACK1       | 1.13 | 4.92E-23 | 5.42E-20 | Over-expressed |
| RPS18       | 1.13 | 5.15E-20 | 2.67E-17 | Over-expressed |
| RPL7A       | 1.13 | 1.15E-18 | 3.08E-16 | Over-expressed |
| MZT2A       | 1.13 | 2.97E-13 | 1.70E-11 | Over-expressed |
| UQCRBP1     | 1.13 | 7.76E-12 | 2.72E-10 | Over-expressed |
| CDCA3       | 1.13 | 5.13E-08 | 5.05E-07 | Over-expressed |
| ZNF233      | 1.13 | 2.69E-07 | 2.08E-06 | Over-expressed |
| SYTL1       | 1.13 | 4.54E-07 | 3.25E-06 | Over-expressed |
| RPPH1       | 1.13 | 3.95E-06 | 2.09E-05 | Over-expressed |
| SNRPN       | 1.13 | 6.57E-06 | 3.26E-05 | Over-expressed |
| RPS15A      | 1.12 | 7.66E-17 | 1.01E-14 | Over-expressed |
| IMPDH2      | 1.12 | 2.03E-15 | 1.88E-13 | Over-expressed |
| GOLGA2P10   | 1.12 | 2.14E-13 | 1.29E-11 | Over-expressed |
| ROMO1       | 1.12 | 3.54E-12 | 1.38E-10 | Over-expressed |
| IL18        | 1.12 | 6.92E-06 | 3.40E-05 | Over-expressed |
| MMP11       | 1.12 | 2.23E-05 | 9.43E-05 | Over-expressed |
| CLDN4       | 1.12 | 0.0223   | 0.0394   | Over-expressed |
| SNHG32      | 1.11 | 2.60E-13 | 1.53E-11 | Over-expressed |
| DHRS13      | 1.11 | 2.02E-12 | 8.64E-11 | Over-expressed |
| NME2P1      | 1.11 | 7.56E-12 | 2.66E-10 | Over-expressed |
| IFI27L2     | 1.11 | 7.83E-07 | 5.18E-06 | Over-expressed |
| YBX3        | 1.11 | 1.00E-05 | 4.71E-05 | Over-expressed |
| GDF15       | 1.11 | 6.92E-05 | 2.53E-04 | Over-expressed |
| S100A11     | 1.1  | 6.61E-06 | 3.27E-05 | Over-expressed |
| HSPB1       | 1.09 | 8.44E-11 | 2.15E-09 | Over-expressed |
| MFS10       | 1.09 | 4.32E-09 | 5.98E-08 | Over-expressed |

|            |      |          |          |                |
|------------|------|----------|----------|----------------|
| SH3BP1     | 1.09 | 2.06E-07 | 1.66E-06 | Over-expressed |
| JAK3       | 1.09 | 4.66E-07 | 3.31E-06 | Over-expressed |
| RPS4X      | 1.08 | 8.44E-18 | 1.61E-15 | Over-expressed |
| RBIS       | 1.08 | 1.68E-12 | 7.46E-11 | Over-expressed |
| TPRN       | 1.08 | 3.37E-09 | 4.85E-08 | Over-expressed |
| PKM        | 1.08 | 2.36E-05 | 9.91E-05 | Over-expressed |
| LAG3       | 1.08 | 2.51E-04 | 7.83E-04 | Over-expressed |
| CD27       | 1.08 | 5.35E-04 | 1.51E-03 | Over-expressed |
| ITPA       | 1.07 | 4.62E-19 | 1.51E-16 | Over-expressed |
| RPL29      | 1.07 | 2.38E-14 | 1.84E-12 | Over-expressed |
| OBSL1      | 1.07 | 1.94E-05 | 8.34E-05 | Over-expressed |
| NT5DC2     | 1.07 | 6.05E-05 | 2.26E-04 | Over-expressed |
| CRACR2B    | 1.07 | 1.83E-04 | 5.97E-04 | Over-expressed |
| RPL17      | 1.06 | 6.65E-17 | 9.11E-15 | Over-expressed |
| NOP56      | 1.06 | 1.57E-14 | 1.26E-12 | Over-expressed |
| GOLGA2P7   | 1.06 | 1.09E-10 | 2.66E-09 | Over-expressed |
| GADD45GIP1 | 1.06 | 1.32E-10 | 3.11E-09 | Over-expressed |
| ZNF90      | 1.06 | 9.72E-09 | 1.20E-07 | Over-expressed |
| PAQR6      | 1.06 | 7.62E-07 | 5.06E-06 | Over-expressed |
| MRNIP      | 1.06 | 6.72E-06 | 3.32E-05 | Over-expressed |
| HES4       | 1.06 | 1.32E-05 | 5.99E-05 | Over-expressed |
| GNLY       | 1.06 | 1.48E-05 | 6.60E-05 | Over-expressed |
| RPL5       | 1.05 | 2.23E-21 | 1.68E-18 | Over-expressed |
| PPP1R14B   | 1.05 | 4.31E-14 | 3.13E-12 | Over-expressed |
| DPCD       | 1.05 | 1.76E-11 | 5.54E-10 | Over-expressed |
| NACA2      | 1.05 | 3.80E-11 | 1.09E-09 | Over-expressed |
| CMTM3      | 1.05 | 2.25E-08 | 2.49E-07 | Over-expressed |
| TMEM141    | 1.05 | 5.49E-08 | 5.33E-07 | Over-expressed |
| LST1       | 1.05 | 9.73E-08 | 8.73E-07 | Over-expressed |
| DNLZ       | 1.05 | 2.93E-07 | 2.23E-06 | Over-expressed |
| BMF        | 1.05 | 4.85E-06 | 2.50E-05 | Over-expressed |
| IER3       | 1.05 | 5.54E-06 | 2.80E-05 | Over-expressed |
| TM4SF1     | 1.05 | 5.95E-06 | 2.99E-05 | Over-expressed |
| CHST10     | 1.05 | 2.36E-05 | 9.90E-05 | Over-expressed |
| HSH2D      | 1.05 | 4.24E-05 | 1.66E-04 | Over-expressed |
| FIGNL2     | 1.05 | 1.71E-04 | 5.61E-04 | Over-expressed |
| SPINT2     | 1.05 | 8.54E-03 | 0.017    | Over-expressed |
| RPL6       | 1.04 | 4.95E-23 | 5.42E-20 | Over-expressed |
| NOP53      | 1.04 | 8.98E-16 | 8.94E-14 | Over-expressed |
| RP9P       | 1.04 | 1.43E-13 | 9.09E-12 | Over-expressed |
| B9D1       | 1.04 | 5.95E-09 | 7.87E-08 | Over-expressed |
| UBE2S      | 1.04 | 7.67E-09 | 9.81E-08 | Over-expressed |
| VEGFB      | 1.04 | 4.35E-08 | 4.36E-07 | Over-expressed |
| LENG9      | 1.04 | 4.15E-07 | 3.01E-06 | Over-expressed |
| DUSP2      | 1.04 | 5.03E-06 | 2.58E-05 | Over-expressed |
| HID1       | 1.04 | 5.96E-06 | 2.99E-05 | Over-expressed |
| EBF4       | 1.04 | 2.20E-04 | 6.97E-04 | Over-expressed |
| GGT1       | 1.04 | 6.81E-04 | 1.87E-03 | Over-expressed |
| RPL10A     | 1.03 | 2.82E-19 | 1.06E-16 | Over-expressed |
| NAP1L1     | 1.03 | 1.62E-15 | 1.52E-13 | Over-expressed |
| ZNF579     | 1.03 | 1.14E-10 | 2.74E-09 | Over-expressed |
| DBNDD2     | 1.03 | 2.73E-08 | 2.94E-07 | Over-expressed |
| LAPTM4B    | 1.03 | 1.00E-06 | 6.40E-06 | Over-expressed |
| RPL36A     | 1.03 | 2.67E-06 | 1.48E-05 | Over-expressed |
| RMRP       | 1.03 | 1.18E-05 | 5.43E-05 | Over-expressed |
| MAPK12     | 1.03 | 1.59E-04 | 5.27E-04 | Over-expressed |
| RPS13      | 1.02 | 2.66E-19 | 1.03E-16 | Over-expressed |

|           |      |          |          |                |
|-----------|------|----------|----------|----------------|
| ITM2C     | 1.02 | 5.71E-11 | 1.54E-09 | Over-expressed |
| RNASET2   | 1.02 | 1.01E-08 | 1.24E-07 | Over-expressed |
| C11ORF80  | 1.02 | 3.29E-08 | 3.46E-07 | Over-expressed |
| STK32C    | 1.02 | 3.44E-08 | 3.58E-07 | Over-expressed |
| FKBP11    | 1.02 | 4.78E-07 | 3.39E-06 | Over-expressed |
| JAML      | 1.02 | 1.71E-06 | 1.01E-05 | Over-expressed |
| SNHG1     | 1.01 | 1.89E-12 | 8.25E-11 | Over-expressed |
| TMEM256   | 1.01 | 1.46E-10 | 3.37E-09 | Over-expressed |
| TOP1MT    | 1.01 | 1.71E-10 | 3.86E-09 | Over-expressed |
| ATP5F1EP2 | 1.01 | 3.22E-09 | 4.66E-08 | Over-expressed |
| FGFR4     | 1.01 | 1.67E-07 | 1.40E-06 | Over-expressed |
| CDC25C    | 1.01 | 2.03E-05 | 8.68E-05 | Over-expressed |
| MROH6     | 1.01 | 2.02E-04 | 6.50E-04 | Over-expressed |
| RAB3D     | 1.01 | 3.25E-04 | 9.79E-04 | Over-expressed |
| S100A9    | 1.01 | 8.43E-04 | 2.25E-03 | Over-expressed |
| ELMO3     | 1.01 | 1.20E-03 | 3.05E-03 | Over-expressed |
| MT1F      | 1.01 | 5.23E-03 | 0.011    | Over-expressed |
| LSM2      | 1    | 9.21E-18 | 1.73E-15 | Over-expressed |
| EEF1G     | 1    | 5.19E-17 | 7.35E-15 | Over-expressed |
| RPS3A     | 1    | 1.28E-16 | 1.59E-14 | Over-expressed |
| TAF1D     | 1    | 5.43E-16 | 5.74E-14 | Over-expressed |
| NT5C      | 1    | 6.17E-14 | 4.28E-12 | Over-expressed |
| UQCRB     | 1    | 2.40E-12 | 9.92E-11 | Over-expressed |
| ATP5F1E   | 1    | 1.29E-11 | 4.25E-10 | Over-expressed |
| COPS9     | 1    | 6.75E-11 | 1.76E-09 | Over-expressed |
| LAMTOR4   | 1    | 1.41E-08 | 1.66E-07 | Over-expressed |
| AP1G2     | 1    | 2.60E-08 | 2.82E-07 | Over-expressed |
| MGC57346  | 1    | 4.21E-07 | 3.04E-06 | Over-expressed |
| PLP2      | 1    | 1.38E-05 | 6.23E-05 | Over-expressed |
| LDLRAD2   | 1    | 2.70E-05 | 1.12E-04 | Over-expressed |
| TMEM51    | 1    | 4.07E-05 | 1.60E-04 | Over-expressed |
| EEF1B2    | 0.99 | 1.97E-18 | 4.90E-16 | Over-expressed |
| RPL19     | 0.99 | 4.19E-18 | 9.02E-16 | Over-expressed |
| SRC       | 0.99 | 2.25E-07 | 1.79E-06 | Over-expressed |
| BLMH      | 0.99 | 6.26E-07 | 4.29E-06 | Over-expressed |
| HIST2H2AC | 0.99 | 1.28E-06 | 7.86E-06 | Over-expressed |
| NDRG1     | 0.99 | 4.64E-06 | 2.41E-05 | Over-expressed |
| CAPN12    | 0.99 | 7.09E-06 | 3.48E-05 | Over-expressed |
| RAD54L    | 0.99 | 2.06E-05 | 8.80E-05 | Over-expressed |
| GSTP1     | 0.99 | 1.75E-04 | 5.73E-04 | Over-expressed |
| NRSN2     | 0.99 | 4.09E-04 | 1.20E-03 | Over-expressed |
| QSOX1     | 0.99 | 5.86E-04 | 1.63E-03 | Over-expressed |
| LY6E      | 0.99 | 7.86E-04 | 2.12E-03 | Over-expressed |
| FKBP10    | 0.99 | 2.25E-03 | 5.30E-03 | Over-expressed |
| ITGAE     | 0.98 | 8.78E-11 | 2.20E-09 | Over-expressed |
| H2AFX     | 0.98 | 1.09E-10 | 2.66E-09 | Over-expressed |
| SLC52A2   | 0.98 | 6.47E-10 | 1.18E-08 | Over-expressed |
| RGS10     | 0.98 | 5.74E-08 | 5.51E-07 | Over-expressed |
| CD300LF   | 0.98 | 1.49E-07 | 1.27E-06 | Over-expressed |
| HOMER3    | 0.98 | 4.01E-06 | 2.12E-05 | Over-expressed |
| PAX8      | 0.98 | 5.99E-06 | 3.00E-05 | Over-expressed |
| RIN1      | 0.98 | 7.39E-06 | 3.61E-05 | Over-expressed |
| RPL39L    | 0.98 | 3.46E-03 | 7.70E-03 | Over-expressed |
| TMC4      | 0.98 | 0.026    | 0.0453   | Over-expressed |
| EIF4A1    | 0.97 | 1.17E-16 | 1.47E-14 | Over-expressed |
| NLE1      | 0.97 | 4.49E-16 | 4.83E-14 | Over-expressed |
| PTDSS2    | 0.97 | 8.54E-15 | 7.24E-13 | Over-expressed |



|          |      |          |          |                |
|----------|------|----------|----------|----------------|
| LBHD1    | 0.97 | 1.37E-12 | 6.21E-11 | Over-expressed |
| MTHFD1L  | 0.97 | 1.05E-11 | 3.54E-10 | Over-expressed |
| MZT2B    | 0.97 | 1.33E-10 | 3.12E-09 | Over-expressed |
| RIPK2    | 0.97 | 3.53E-10 | 7.09E-09 | Over-expressed |
| SURF2    | 0.97 | 4.76E-09 | 6.50E-08 | Over-expressed |
| TRIP13   | 0.97 | 1.46E-05 | 6.51E-05 | Over-expressed |
| S100A13  | 0.97 | 3.32E-05 | 1.34E-04 | Over-expressed |
| TICRR    | 0.97 | 5.39E-05 | 2.04E-04 | Over-expressed |
| SLC2A1   | 0.97 | 1.52E-04 | 5.06E-04 | Over-expressed |
| EMG1     | 0.96 | 9.36E-18 | 1.74E-15 | Over-expressed |
| RPL11    | 0.96 | 4.74E-17 | 6.81E-15 | Over-expressed |
| NANOS1   | 0.96 | 1.90E-16 | 2.29E-14 | Over-expressed |
| C17ORF49 | 0.96 | 2.81E-13 | 1.63E-11 | Over-expressed |
| UBA52    | 0.96 | 1.62E-12 | 7.20E-11 | Over-expressed |
| BOLA2    | 0.96 | 4.47E-10 | 8.76E-09 | Over-expressed |
| NDUFAF8  | 0.96 | 2.02E-08 | 2.26E-07 | Over-expressed |
| EME1     | 0.96 | 3.70E-07 | 2.72E-06 | Over-expressed |
| SINHCAF  | 0.96 | 5.13E-06 | 2.63E-05 | Over-expressed |
| CRIP1    | 0.96 | 5.51E-06 | 2.79E-05 | Over-expressed |
| RENBP    | 0.96 | 1.73E-04 | 5.66E-04 | Over-expressed |
| LSM7     | 0.95 | 2.88E-12 | 1.16E-10 | Over-expressed |
| SEC61G   | 0.95 | 5.32E-12 | 1.97E-10 | Over-expressed |
| HRAS     | 0.95 | 7.21E-12 | 2.56E-10 | Over-expressed |
| CCNB1    | 0.95 | 1.50E-06 | 9.01E-06 | Over-expressed |
| IL4I1    | 0.95 | 9.81E-06 | 4.62E-05 | Over-expressed |
| P2RX5    | 0.95 | 1.35E-05 | 6.07E-05 | Over-expressed |
| PIF1     | 0.95 | 3.85E-05 | 1.52E-04 | Over-expressed |
| SNHG9    | 0.95 | 1.69E-04 | 5.56E-04 | Over-expressed |
| LYRM4    | 0.94 | 8.43E-19 | 2.48E-16 | Over-expressed |
| RAB24    | 0.94 | 1.12E-16 | 1.41E-14 | Over-expressed |
| PFDN5    | 0.94 | 3.91E-16 | 4.25E-14 | Over-expressed |
| MXD3     | 0.94 | 1.15E-13 | 7.41E-12 | Over-expressed |
| POU2F1   | 0.94 | 2.18E-11 | 6.81E-10 | Over-expressed |
| TAS2R20  | 0.94 | 5.68E-11 | 1.54E-09 | Over-expressed |
| PABPC1   | 0.94 | 1.53E-10 | 3.51E-09 | Over-expressed |
| CCDC167  | 0.94 | 3.36E-10 | 6.82E-09 | Over-expressed |
| NAA38    | 0.94 | 2.00E-09 | 3.07E-08 | Over-expressed |
| SOX12    | 0.94 | 2.79E-08 | 2.98E-07 | Over-expressed |
| CRYGS    | 0.94 | 5.46E-08 | 5.31E-07 | Over-expressed |
| TLCD5    | 0.94 | 1.62E-07 | 1.37E-06 | Over-expressed |
| FAM71E1  | 0.94 | 3.62E-05 | 1.44E-04 | Over-expressed |
| FCGBP    | 0.94 | 4.23E-04 | 1.23E-03 | Over-expressed |
| ADAM6    | 0.94 | 0.0279   | 0.0482   | Over-expressed |
| SNRPB    | 0.93 | 1.27E-15 | 1.22E-13 | Over-expressed |
| NME2     | 0.93 | 7.69E-13 | 3.72E-11 | Over-expressed |
| PKN1     | 0.93 | 9.01E-11 | 2.25E-09 | Over-expressed |
| DDAH2    | 0.93 | 2.27E-10 | 4.90E-09 | Over-expressed |
| RPL23P8  | 0.93 | 1.38E-09 | 2.25E-08 | Over-expressed |
| NDUFB9   | 0.93 | 5.42E-09 | 7.30E-08 | Over-expressed |
| PLEKHO1  | 0.93 | 1.51E-08 | 1.75E-07 | Over-expressed |
| MIF      | 0.93 | 8.33E-07 | 5.45E-06 | Over-expressed |
| CCNB2    | 0.93 | 3.82E-05 | 1.51E-04 | Over-expressed |
| PTPRCAP  | 0.93 | 4.90E-05 | 1.88E-04 | Over-expressed |
| PALM     | 0.93 | 2.85E-04 | 8.74E-04 | Over-expressed |
| ZNF580   | 0.92 | 5.89E-10 | 1.09E-08 | Over-expressed |
| UQCC3    | 0.92 | 8.84E-10 | 1.54E-08 | Over-expressed |
| SUPT3H   | 0.92 | 1.38E-09 | 2.25E-08 | Over-expressed |

|          |      |          |          |                |
|----------|------|----------|----------|----------------|
| JPT1     | 0.92 | 2.66E-09 | 3.95E-08 | Over-expressed |
| ARL2     | 0.92 | 2.92E-09 | 4.28E-08 | Over-expressed |
| SMAGP    | 0.92 | 5.85E-09 | 7.77E-08 | Over-expressed |
| NPIPB3   | 0.92 | 2.30E-08 | 2.53E-07 | Over-expressed |
| ARHGAP39 | 0.92 | 3.64E-07 | 2.68E-06 | Over-expressed |
| TRAIIP   | 0.92 | 7.45E-07 | 4.97E-06 | Over-expressed |
| COMTD1   | 0.92 | 2.78E-06 | 1.54E-05 | Over-expressed |
| AIF1     | 0.92 | 5.12E-06 | 2.62E-05 | Over-expressed |
| DNASE1   | 0.92 | 1.17E-05 | 5.39E-05 | Over-expressed |
| PLTP     | 0.92 | 2.54E-04 | 7.90E-04 | Over-expressed |
| PTK7     | 0.92 | 0.0179   | 0.0325   | Over-expressed |
| SNRPD1   | 0.91 | 5.65E-15 | 5.00E-13 | Over-expressed |
| MRPL23   | 0.91 | 4.92E-11 | 1.37E-09 | Over-expressed |
| WRAP53   | 0.91 | 8.77E-11 | 2.20E-09 | Over-expressed |
| TRIP10   | 0.91 | 4.46E-10 | 8.76E-09 | Over-expressed |
| PUSL1    | 0.91 | 6.29E-10 | 1.15E-08 | Over-expressed |
| KRT8     | 0.91 | 8.74E-10 | 1.53E-08 | Over-expressed |
| PSMG3    | 0.91 | 3.99E-09 | 5.60E-08 | Over-expressed |
| VPS28    | 0.91 | 7.18E-09 | 9.25E-08 | Over-expressed |
| KRT18    | 0.91 | 9.03E-09 | 1.12E-07 | Over-expressed |
| TONSL    | 0.91 | 1.56E-07 | 1.32E-06 | Over-expressed |
| RAB3IL1  | 0.91 | 3.70E-07 | 2.72E-06 | Over-expressed |
| C2ORF81  | 0.91 | 1.78E-06 | 1.05E-05 | Over-expressed |
| SCAMP5   | 0.91 | 8.97E-05 | 3.19E-04 | Over-expressed |
| FZD2     | 0.91 | 5.27E-04 | 1.49E-03 | Over-expressed |
| TMEM200B | 0.91 | 3.54E-03 | 7.85E-03 | Over-expressed |
| RNASEK   | 0.9  | 3.01E-13 | 1.71E-11 | Over-expressed |
| TOMM7    | 0.9  | 2.29E-12 | 9.60E-11 | Over-expressed |
| GEMIN7   | 0.9  | 3.75E-11 | 1.08E-09 | Over-expressed |
| NDUFB11  | 0.9  | 5.56E-11 | 1.52E-09 | Over-expressed |
| EIF3E    | 0.9  | 1.40E-10 | 3.27E-09 | Over-expressed |
| MTFP1    | 0.9  | 1.16E-09 | 1.95E-08 | Over-expressed |
| STX1A    | 0.9  | 6.61E-08 | 6.24E-07 | Over-expressed |
| COX6B1   | 0.9  | 9.60E-08 | 8.65E-07 | Over-expressed |
| C1ORF54  | 0.9  | 3.06E-07 | 2.32E-06 | Over-expressed |
| P3H4     | 0.9  | 1.83E-05 | 7.95E-05 | Over-expressed |
| IMPDH1   | 0.9  | 2.43E-05 | 1.02E-04 | Over-expressed |
| BCAM     | 0.9  | 3.40E-05 | 1.37E-04 | Over-expressed |
| WSCD1    | 0.9  | 1.03E-04 | 3.59E-04 | Over-expressed |
| STMN3    | 0.9  | 7.67E-04 | 2.07E-03 | Over-expressed |
| PLA2G7   | 0.9  | 8.90E-04 | 2.35E-03 | Over-expressed |
| TMEM54   | 0.9  | 2.22E-03 | 5.23E-03 | Over-expressed |
| SDCBP2   | 0.9  | 2.44E-03 | 5.67E-03 | Over-expressed |
| HNRNPA1  | 0.89 | 4.52E-19 | 1.51E-16 | Over-expressed |
| ZNRD1    | 0.89 | 2.13E-17 | 3.29E-15 | Over-expressed |
| NPM1     | 0.89 | 1.73E-12 | 7.63E-11 | Over-expressed |
| YDJC     | 0.89 | 2.85E-12 | 1.16E-10 | Over-expressed |
| PPP1R35  | 0.89 | 3.03E-12 | 1.20E-10 | Over-expressed |
| TMEM147  | 0.89 | 1.30E-11 | 4.29E-10 | Over-expressed |
| TIMM13   | 0.89 | 4.49E-09 | 6.18E-08 | Over-expressed |
| PHPT1    | 0.89 | 5.19E-08 | 5.10E-07 | Over-expressed |
| TTLL4    | 0.89 | 8.08E-07 | 5.31E-06 | Over-expressed |
| HCST     | 0.89 | 3.42E-05 | 1.38E-04 | Over-expressed |
| IER5L    | 0.89 | 3.78E-05 | 1.50E-04 | Over-expressed |
| SEPTIN5  | 0.89 | 1.60E-04 | 5.29E-04 | Over-expressed |
| LINGO1   | 0.89 | 7.29E-03 | 0.0148   | Over-expressed |
| ACHE     | 0.89 | 8.64E-03 | 0.0172   | Over-expressed |

|               |      |          |          |                |
|---------------|------|----------|----------|----------------|
| POLR2H        | 0.88 | 9.88E-18 | 1.79E-15 | Over-expressed |
| RPL22         | 0.88 | 2.37E-17 | 3.61E-15 | Over-expressed |
| NOP16         | 0.88 | 4.54E-12 | 1.70E-10 | Over-expressed |
| SLC25A6       | 0.88 | 6.43E-12 | 2.33E-10 | Over-expressed |
| WASH8P        | 0.88 | 8.08E-11 | 2.06E-09 | Over-expressed |
| TXNDC17       | 0.88 | 2.86E-10 | 5.94E-09 | Over-expressed |
| MRPL52        | 0.88 | 4.77E-09 | 6.51E-08 | Over-expressed |
| TAX1BP3       | 0.88 | 1.85E-07 | 1.51E-06 | Over-expressed |
| NDUFA3        | 0.88 | 6.07E-07 | 4.17E-06 | Over-expressed |
| ETV2          | 0.88 | 1.33E-06 | 8.09E-06 | Over-expressed |
| CDCA5         | 0.88 | 2.66E-06 | 1.48E-05 | Over-expressed |
| TPM2          | 0.88 | 6.79E-06 | 3.35E-05 | Over-expressed |
| CARD9         | 0.88 | 1.23E-05 | 5.61E-05 | Over-expressed |
| G6PD          | 0.88 | 7.68E-05 | 2.78E-04 | Over-expressed |
| HAPLN3        | 0.88 | 8.16E-05 | 2.93E-04 | Over-expressed |
| CEP55         | 0.88 | 9.06E-05 | 3.22E-04 | Over-expressed |
| LGALS3BP      | 0.88 | 2.20E-04 | 6.98E-04 | Over-expressed |
| SLC7A1        | 0.88 | 4.22E-04 | 1.23E-03 | Over-expressed |
| CDKN1C        | 0.88 | 4.32E-03 | 9.37E-03 | Over-expressed |
| EGLN3         | 0.88 | 8.51E-03 | 0.017    | Over-expressed |
| SLFN13        | 0.88 | 0.0101   | 0.0198   | Over-expressed |
| DYNLRB1       | 0.87 | 2.09E-13 | 1.27E-11 | Over-expressed |
| ZNF692        | 0.87 | 3.33E-13 | 1.82E-11 | Over-expressed |
| SNRPF         | 0.87 | 5.78E-13 | 2.85E-11 | Over-expressed |
| WDYHV1        | 0.87 | 9.71E-12 | 3.34E-10 | Over-expressed |
| TGIF2         | 0.87 | 3.36E-10 | 6.82E-09 | Over-expressed |
| RFXANK        | 0.87 | 7.08E-10 | 1.27E-08 | Over-expressed |
| CCZ1P-OR7E38P | 0.87 | 4.54E-07 | 3.25E-06 | Over-expressed |
| REC8          | 0.87 | 1.88E-06 | 1.10E-05 | Over-expressed |
| CHD3          | 0.87 | 3.93E-06 | 2.08E-05 | Over-expressed |
| FGD3          | 0.87 | 1.32E-05 | 5.99E-05 | Over-expressed |
| BAMBI         | 0.87 | 2.03E-05 | 8.69E-05 | Over-expressed |
| ELF3          | 0.87 | 3.35E-04 | 1.01E-03 | Over-expressed |
| GAPDH         | 0.86 | 1.32E-11 | 4.34E-10 | Over-expressed |
| UQCC2         | 0.86 | 1.81E-11 | 5.68E-10 | Over-expressed |
| PPCDC         | 0.86 | 3.19E-11 | 9.38E-10 | Over-expressed |
| COMMD6        | 0.86 | 3.89E-11 | 1.11E-09 | Over-expressed |
| ZNF444        | 0.86 | 6.45E-11 | 1.70E-09 | Over-expressed |
| TMEM44        | 0.86 | 1.89E-10 | 4.15E-09 | Over-expressed |
| C12ORF57      | 0.86 | 2.44E-10 | 5.21E-09 | Over-expressed |
| NME1          | 0.86 | 4.52E-10 | 8.84E-09 | Over-expressed |
| PLEKHJ1       | 0.86 | 4.77E-10 | 9.22E-09 | Over-expressed |
| WDR34         | 0.86 | 6.12E-09 | 8.08E-08 | Over-expressed |
| B9D2          | 0.86 | 2.33E-08 | 2.55E-07 | Over-expressed |
| CDRT4         | 0.86 | 1.85E-07 | 1.51E-06 | Over-expressed |
| BLVRA         | 0.86 | 6.97E-07 | 4.70E-06 | Over-expressed |
| COX6C         | 0.86 | 1.90E-06 | 1.11E-05 | Over-expressed |
| CCDC88B       | 0.86 | 3.03E-06 | 1.65E-05 | Over-expressed |
| FCHSD1        | 0.86 | 5.40E-06 | 2.74E-05 | Over-expressed |
| OVGP1         | 0.86 | 4.30E-05 | 1.68E-04 | Over-expressed |
| NBL1          | 0.86 | 4.96E-04 | 1.42E-03 | Over-expressed |
| FCGR1B        | 0.86 | 5.57E-04 | 1.56E-03 | Over-expressed |
| S100A1        | 0.86 | 5.63E-03 | 0.0118   | Over-expressed |
| MAL2          | 0.86 | 5.94E-03 | 0.0124   | Over-expressed |
| BAIAP2L2      | 0.86 | 0.0134   | 0.0253   | Over-expressed |
| RPL10         | 0.85 | 5.64E-15 | 5.00E-13 | Over-expressed |
| MAPKAPK5-AS1  | 0.85 | 1.55E-13 | 9.70E-12 | Over-expressed |

|          |      |          |          |                |
|----------|------|----------|----------|----------------|
| TRAPPC1  | 0.85 | 1.26E-11 | 4.17E-10 | Over-expressed |
| MARCKS   | 0.85 | 2.18E-09 | 3.32E-08 | Over-expressed |
| NFKBIE   | 0.85 | 2.90E-09 | 4.25E-08 | Over-expressed |
| CDC42EP2 | 0.85 | 5.23E-07 | 3.66E-06 | Over-expressed |
| NREP     | 0.85 | 2.27E-05 | 9.57E-05 | Over-expressed |
| SPC25    | 0.85 | 3.01E-05 | 1.23E-04 | Over-expressed |
| PIGZ     | 0.85 | 1.45E-04 | 4.84E-04 | Over-expressed |
| GDF11    | 0.85 | 3.41E-04 | 1.02E-03 | Over-expressed |
| ACSS1    | 0.85 | 4.99E-04 | 1.42E-03 | Over-expressed |
| CERCAM   | 0.85 | 2.36E-03 | 5.51E-03 | Over-expressed |
| P3H3     | 0.85 | 8.18E-03 | 0.0164   | Over-expressed |
| VWCE     | 0.85 | 0.0245   | 0.0429   | Over-expressed |
| RPL15    | 0.84 | 3.28E-18 | 7.31E-16 | Over-expressed |
| ATP5MC2  | 0.84 | 1.55E-17 | 2.58E-15 | Over-expressed |
| PTRHD1   | 0.84 | 2.39E-14 | 1.84E-12 | Over-expressed |
| HSF1     | 0.84 | 2.24E-11 | 6.98E-10 | Over-expressed |
| MAF1     | 0.84 | 2.27E-11 | 7.02E-10 | Over-expressed |
| EIF3H    | 0.84 | 3.53E-11 | 1.03E-09 | Over-expressed |
| ENY2     | 0.84 | 1.01E-09 | 1.73E-08 | Over-expressed |
| OVCA2    | 0.84 | 2.70E-09 | 4.00E-08 | Over-expressed |
| SH3BGRL3 | 0.84 | 7.98E-09 | 1.01E-07 | Over-expressed |
| C11ORF49 | 0.84 | 5.24E-08 | 5.14E-07 | Over-expressed |
| TNFRSF4  | 0.84 | 3.22E-07 | 2.42E-06 | Over-expressed |
| INAFM1   | 0.84 | 3.58E-07 | 2.65E-06 | Over-expressed |
| EMILIN2  | 0.84 | 9.71E-07 | 6.22E-06 | Over-expressed |
| RAD51    | 0.84 | 3.20E-05 | 1.29E-04 | Over-expressed |
| CD52     | 0.84 | 3.54E-05 | 1.42E-04 | Over-expressed |
| C7ORF31  | 0.84 | 5.23E-05 | 1.99E-04 | Over-expressed |
| UNC13D   | 0.84 | 1.48E-04 | 4.93E-04 | Over-expressed |
| CFD      | 0.84 | 1.63E-04 | 5.36E-04 | Over-expressed |
| MEX3A    | 0.84 | 2.06E-04 | 6.59E-04 | Over-expressed |
| SEMA3B   | 0.84 | 2.04E-03 | 4.85E-03 | Over-expressed |
| GSPT2    | 0.84 | 7.37E-03 | 0.0149   | Over-expressed |
| NXT1     | 0.83 | 9.81E-14 | 6.43E-12 | Over-expressed |
| RPS25    | 0.83 | 3.97E-13 | 2.06E-11 | Over-expressed |
| WASH5P   | 0.83 | 5.00E-13 | 2.55E-11 | Over-expressed |
| IDI2     | 0.83 | 2.41E-12 | 9.95E-11 | Over-expressed |
| METTL1   | 0.83 | 3.36E-12 | 1.32E-10 | Over-expressed |
| EMC6     | 0.83 | 2.48E-11 | 7.58E-10 | Over-expressed |
| TIGD5    | 0.83 | 5.43E-10 | 1.03E-08 | Over-expressed |
| CTU1     | 0.83 | 1.23E-09 | 2.05E-08 | Over-expressed |
| PGLS     | 0.83 | 3.21E-09 | 4.65E-08 | Over-expressed |
| LSM8     | 0.83 | 1.08E-08 | 1.32E-07 | Over-expressed |
| STAC3    | 0.83 | 3.33E-07 | 2.49E-06 | Over-expressed |
| MCRIP1   | 0.83 | 1.12E-06 | 7.04E-06 | Over-expressed |
| TLCD3A   | 0.83 | 7.34E-05 | 2.67E-04 | Over-expressed |
| LAD1     | 0.83 | 0.019    | 0.0343   | Over-expressed |
| IGF2BP3  | 0.83 | 0.0191   | 0.0344   | Over-expressed |
| SNRPE    | 0.82 | 2.30E-13 | 1.37E-11 | Over-expressed |
| LSM4     | 0.82 | 2.48E-11 | 7.58E-10 | Over-expressed |
| EIF6     | 0.82 | 3.08E-11 | 9.13E-10 | Over-expressed |
| SHARPIN  | 0.82 | 3.83E-11 | 1.09E-09 | Over-expressed |
| ELOC     | 0.82 | 1.30E-10 | 3.08E-09 | Over-expressed |
| EIF3K    | 0.82 | 1.68E-09 | 2.66E-08 | Over-expressed |
| ATP5MD   | 0.82 | 2.05E-09 | 3.15E-08 | Over-expressed |
| UBALD2   | 0.82 | 7.72E-09 | 9.84E-08 | Over-expressed |
| CSKMT    | 0.82 | 1.93E-08 | 2.17E-07 | Over-expressed |

|           |      |          |          |                |
|-----------|------|----------|----------|----------------|
| KRTCAP2   | 0.82 | 3.17E-08 | 3.34E-07 | Over-expressed |
| ANO7      | 0.82 | 7.70E-07 | 5.10E-06 | Over-expressed |
| CENPW     | 0.82 | 1.90E-06 | 1.10E-05 | Over-expressed |
| DEF6      | 0.82 | 2.08E-06 | 1.19E-05 | Over-expressed |
| TNFAIP8L2 | 0.82 | 7.59E-06 | 3.69E-05 | Over-expressed |
| PLXNA3    | 0.82 | 1.34E-05 | 6.04E-05 | Over-expressed |
| PACSIN3   | 0.82 | 7.66E-05 | 2.77E-04 | Over-expressed |
| IKBKE     | 0.82 | 2.44E-04 | 7.63E-04 | Over-expressed |
| PLK1      | 0.82 | 3.95E-04 | 1.16E-03 | Over-expressed |
| ACAP1     | 0.82 | 4.17E-04 | 1.22E-03 | Over-expressed |
| HSPA6     | 0.82 | 5.70E-04 | 1.59E-03 | Over-expressed |
| NKG7      | 0.82 | 3.13E-03 | 7.07E-03 | Over-expressed |
| GSTO2     | 0.82 | 6.75E-03 | 0.0139   | Over-expressed |
| BOP1      | 0.82 | 9.58E-03 | 0.0188   | Over-expressed |
| PELP1     | 0.81 | 5.42E-14 | 3.84E-12 | Over-expressed |
| WASH2P    | 0.81 | 8.88E-14 | 5.94E-12 | Over-expressed |
| RPP21     | 0.81 | 1.36E-12 | 6.21E-11 | Over-expressed |
| PCBP4     | 0.81 | 7.21E-12 | 2.56E-10 | Over-expressed |
| TFPT      | 0.81 | 1.82E-10 | 4.04E-09 | Over-expressed |
| BUD31     | 0.81 | 4.24E-10 | 8.37E-09 | Over-expressed |
| DPM2      | 0.81 | 1.86E-09 | 2.89E-08 | Over-expressed |
| DNMT3A    | 0.81 | 3.62E-09 | 5.14E-08 | Over-expressed |
| HDAC11    | 0.81 | 4.45E-09 | 6.14E-08 | Over-expressed |
| BCAS4     | 0.81 | 4.61E-09 | 6.32E-08 | Over-expressed |
| SAC3D1    | 0.81 | 8.89E-09 | 1.11E-07 | Over-expressed |
| SPATA24   | 0.81 | 9.36E-09 | 1.16E-07 | Over-expressed |
| JUND      | 0.81 | 1.25E-08 | 1.49E-07 | Over-expressed |
| NDUFAF2   | 0.81 | 2.46E-08 | 2.68E-07 | Over-expressed |
| SNHG11    | 0.81 | 1.49E-07 | 1.27E-06 | Over-expressed |
| NDUFS6    | 0.81 | 1.65E-07 | 1.38E-06 | Over-expressed |
| KIFC2     | 0.81 | 4.85E-06 | 2.50E-05 | Over-expressed |
| CHKB-DT   | 0.81 | 5.61E-06 | 2.83E-05 | Over-expressed |
| RAC2      | 0.81 | 2.99E-05 | 1.22E-04 | Over-expressed |
| PCLAF     | 0.81 | 4.60E-05 | 1.77E-04 | Over-expressed |
| MYC       | 0.81 | 4.35E-04 | 1.26E-03 | Over-expressed |
| CENPV     | 0.81 | 1.12E-03 | 2.87E-03 | Over-expressed |
| SV2A      | 0.81 | 3.48E-03 | 7.75E-03 | Over-expressed |
| PLBD1     | 0.81 | 9.62E-03 | 0.0189   | Over-expressed |
| TOMM6     | 0.8  | 2.50E-15 | 2.29E-13 | Over-expressed |
| PRELID1   | 0.8  | 1.11E-12 | 5.13E-11 | Over-expressed |
| EEF1A1    | 0.8  | 2.86E-12 | 1.16E-10 | Over-expressed |
| NHP2      | 0.8  | 1.35E-11 | 4.42E-10 | Over-expressed |
| EXOSC5    | 0.8  | 1.59E-11 | 5.12E-10 | Over-expressed |
| RRP12     | 0.8  | 2.25E-11 | 6.99E-10 | Over-expressed |
| PIK3R6    | 0.8  | 1.52E-06 | 9.09E-06 | Over-expressed |
| SYP       | 0.8  | 7.17E-04 | 1.95E-03 | Over-expressed |
| UAP1L1    | 0.8  | 1.41E-03 | 3.51E-03 | Over-expressed |
| RGS2      | 0.8  | 1.72E-03 | 4.17E-03 | Over-expressed |
| HKDC1     | 0.8  | 0.013    | 0.0245   | Over-expressed |
| BMS1P20   | 0.8  | 0.0238   | 0.0419   | Over-expressed |
| NAT9      | 0.79 | 3.48E-14 | 2.59E-12 | Over-expressed |
| SNRPA     | 0.79 | 6.17E-13 | 3.00E-11 | Over-expressed |
| CCDC12    | 0.79 | 1.25E-12 | 5.71E-11 | Over-expressed |
| PPIH      | 0.79 | 1.04E-11 | 3.53E-10 | Over-expressed |
| TOMM40    | 0.79 | 7.26E-10 | 1.30E-08 | Over-expressed |
| SDHAF1    | 0.79 | 1.25E-09 | 2.07E-08 | Over-expressed |
| B3GNTL1   | 0.79 | 6.66E-07 | 4.54E-06 | Over-expressed |

|            |      |          |          |                |
|------------|------|----------|----------|----------------|
| CD320      | 0.79 | 1.71E-06 | 1.01E-05 | Over-expressed |
| SLC4A5     | 0.79 | 7.70E-06 | 3.74E-05 | Over-expressed |
| ALDOA      | 0.79 | 9.71E-06 | 4.58E-05 | Over-expressed |
| TNFRSF21   | 0.79 | 9.35E-05 | 3.31E-04 | Over-expressed |
| FCER1G     | 0.79 | 1.15E-04 | 3.97E-04 | Over-expressed |
| PTPN7      | 0.79 | 1.95E-04 | 6.30E-04 | Over-expressed |
| CALHM6     | 0.79 | 1.17E-03 | 2.98E-03 | Over-expressed |
| CDC25A     | 0.79 | 1.37E-03 | 3.42E-03 | Over-expressed |
| SMARCD3    | 0.79 | 2.41E-03 | 5.62E-03 | Over-expressed |
| MRGBP      | 0.78 | 8.20E-17 | 1.06E-14 | Over-expressed |
| GABARAP    | 0.78 | 1.16E-11 | 3.87E-10 | Over-expressed |
| DPH7       | 0.78 | 1.72E-11 | 5.45E-10 | Over-expressed |
| PTOV1      | 0.78 | 2.37E-11 | 7.29E-10 | Over-expressed |
| BAX        | 0.78 | 1.82E-10 | 4.04E-09 | Over-expressed |
| CKS1B      | 0.78 | 5.37E-09 | 7.24E-08 | Over-expressed |
| RNASEH2C   | 0.78 | 7.69E-09 | 9.81E-08 | Over-expressed |
| NOSIP      | 0.78 | 1.17E-08 | 1.40E-07 | Over-expressed |
| CPNE1      | 0.78 | 1.20E-08 | 1.44E-07 | Over-expressed |
| FANCI      | 0.78 | 1.07E-07 | 9.42E-07 | Over-expressed |
| SEM1       | 0.78 | 1.14E-07 | 1.00E-06 | Over-expressed |
| NDUFA13    | 0.78 | 8.91E-07 | 5.78E-06 | Over-expressed |
| CCDC85B    | 0.78 | 4.22E-06 | 2.22E-05 | Over-expressed |
| ATP5ME     | 0.78 | 6.90E-06 | 3.39E-05 | Over-expressed |
| CEBPD      | 0.78 | 8.89E-06 | 4.24E-05 | Over-expressed |
| MMP24      | 0.78 | 1.41E-04 | 4.72E-04 | Over-expressed |
| STK39      | 0.78 | 5.23E-04 | 1.48E-03 | Over-expressed |
| CDC45      | 0.78 | 6.88E-04 | 1.88E-03 | Over-expressed |
| CD6        | 0.78 | 7.50E-04 | 2.03E-03 | Over-expressed |
| GZMB       | 0.78 | 3.13E-03 | 7.07E-03 | Over-expressed |
| SLAMF7     | 0.78 | 4.65E-03 | 9.99E-03 | Over-expressed |
| DDR1       | 0.78 | 0.0116   | 0.0222   | Over-expressed |
| PDRG1      | 0.77 | 5.96E-16 | 6.25E-14 | Over-expressed |
| SNRPC      | 0.77 | 5.63E-14 | 3.95E-12 | Over-expressed |
| PQBP1      | 0.77 | 9.10E-13 | 4.30E-11 | Over-expressed |
| DTNBP1     | 0.77 | 3.51E-11 | 1.02E-09 | Over-expressed |
| MRPL14     | 0.77 | 2.49E-10 | 5.30E-09 | Over-expressed |
| PPAN       | 0.77 | 1.29E-09 | 2.13E-08 | Over-expressed |
| RBPJ       | 0.77 | 3.49E-09 | 5.01E-08 | Over-expressed |
| ALYREF     | 0.77 | 4.62E-09 | 6.32E-08 | Over-expressed |
| DTYMK      | 0.77 | 1.00E-08 | 1.23E-07 | Over-expressed |
| TIAF1      | 0.77 | 1.04E-06 | 6.63E-06 | Over-expressed |
| ATAD3B     | 0.77 | 3.19E-06 | 1.73E-05 | Over-expressed |
| GLI4       | 0.77 | 4.16E-06 | 2.19E-05 | Over-expressed |
| MRPS17     | 0.77 | 6.12E-06 | 3.06E-05 | Over-expressed |
| ZNF593     | 0.77 | 9.31E-06 | 4.42E-05 | Over-expressed |
| TMEM160    | 0.77 | 1.07E-05 | 5.00E-05 | Over-expressed |
| TEDC1      | 0.77 | 1.12E-05 | 5.20E-05 | Over-expressed |
| ST6GALNAC4 | 0.77 | 1.72E-05 | 7.51E-05 | Over-expressed |
| MIR17HG    | 0.77 | 1.94E-04 | 6.28E-04 | Over-expressed |
| LRRC56     | 0.77 | 2.07E-04 | 6.62E-04 | Over-expressed |
| ANKRD13B   | 0.77 | 2.30E-04 | 7.24E-04 | Over-expressed |
| MESP1      | 0.77 | 4.84E-04 | 1.39E-03 | Over-expressed |
| SKA1       | 0.77 | 7.52E-04 | 2.03E-03 | Over-expressed |
| APOBEC3D   | 0.77 | 9.07E-04 | 2.39E-03 | Over-expressed |
| BMP6       | 0.77 | 1.44E-03 | 3.56E-03 | Over-expressed |
| OLFML3     | 0.77 | 6.21E-03 | 0.0129   | Over-expressed |
| EIF5A      | 0.76 | 2.24E-13 | 1.35E-11 | Over-expressed |

|            |      |          |          |                |
|------------|------|----------|----------|----------------|
| PIGU       | 0.76 | 3.43E-12 | 1.34E-10 | Over-expressed |
| CDK4       | 0.76 | 1.27E-11 | 4.20E-10 | Over-expressed |
| CDKN2AIPNL | 0.76 | 5.83E-11 | 1.56E-09 | Over-expressed |
| GTF3C6     | 0.76 | 5.89E-10 | 1.09E-08 | Over-expressed |
| PRMT1      | 0.76 | 3.57E-09 | 5.10E-08 | Over-expressed |
| POLR2I     | 0.76 | 5.68E-08 | 5.48E-07 | Over-expressed |
| SPRN       | 0.76 | 7.75E-08 | 7.18E-07 | Over-expressed |
| VAMP8      | 0.76 | 8.54E-08 | 7.81E-07 | Over-expressed |
| MRPS12     | 0.76 | 1.62E-07 | 1.37E-06 | Over-expressed |
| C20ORF27   | 0.76 | 1.90E-07 | 1.55E-06 | Over-expressed |
| PAM16      | 0.76 | 1.22E-06 | 7.58E-06 | Over-expressed |
| BEND3      | 0.76 | 3.42E-06 | 1.84E-05 | Over-expressed |
| FAM228B    | 0.76 | 4.57E-05 | 1.76E-04 | Over-expressed |
| IL2RG      | 0.76 | 9.57E-04 | 2.51E-03 | Over-expressed |
| FGFR3      | 0.76 | 1.18E-03 | 3.00E-03 | Over-expressed |
| BATF       | 0.76 | 4.02E-03 | 8.77E-03 | Over-expressed |
| CA11       | 0.76 | 5.02E-03 | 0.0107   | Over-expressed |
| SEL1L3     | 0.76 | 6.44E-03 | 0.0133   | Over-expressed |
| NACA       | 0.75 | 4.80E-19 | 1.52E-16 | Over-expressed |
| NACA4P     | 0.75 | 2.34E-13 | 1.39E-11 | Over-expressed |
| TMEM258    | 0.75 | 1.15E-12 | 5.29E-11 | Over-expressed |
| MRT04      | 0.75 | 1.61E-10 | 3.67E-09 | Over-expressed |
| TRIM28     | 0.75 | 1.84E-10 | 4.06E-09 | Over-expressed |
| ATP5MPL    | 0.75 | 6.48E-09 | 8.48E-08 | Over-expressed |
| SERF2      | 0.75 | 6.83E-09 | 8.86E-08 | Over-expressed |
| C19ORF53   | 0.75 | 1.39E-08 | 1.64E-07 | Over-expressed |
| BCL7C      | 0.75 | 8.77E-08 | 8.00E-07 | Over-expressed |
| RASSF7     | 0.75 | 5.10E-06 | 2.61E-05 | Over-expressed |
| ARHGAP22   | 0.75 | 1.43E-04 | 4.80E-04 | Over-expressed |
| AGPAT2     | 0.75 | 2.83E-04 | 8.67E-04 | Over-expressed |
| CCL3       | 0.75 | 5.70E-04 | 1.59E-03 | Over-expressed |
| TBC1D10C   | 0.75 | 2.36E-03 | 5.51E-03 | Over-expressed |
| IGSF3      | 0.75 | 2.40E-03 | 5.60E-03 | Over-expressed |
| SLC45A4    | 0.75 | 5.14E-03 | 0.0109   | Over-expressed |
| IL17RE     | 0.75 | 6.19E-03 | 0.0128   | Over-expressed |
| DLG3       | 0.75 | 8.52E-03 | 0.017    | Over-expressed |
| EIF3F      | 0.74 | 3.08E-16 | 3.43E-14 | Over-expressed |
| NR2C2AP    | 0.74 | 3.10E-13 | 1.74E-11 | Over-expressed |
| WASH7P     | 0.74 | 2.94E-12 | 1.17E-10 | Over-expressed |
| TCOF1      | 0.74 | 2.31E-11 | 7.11E-10 | Over-expressed |
| YWHAZ      | 0.74 | 1.12E-10 | 2.70E-09 | Over-expressed |
| CKLF       | 0.74 | 3.41E-10 | 6.91E-09 | Over-expressed |
| DDX39A     | 0.74 | 9.28E-10 | 1.60E-08 | Over-expressed |
| MRPL13     | 0.74 | 1.69E-09 | 2.67E-08 | Over-expressed |
| FHL3       | 0.74 | 1.93E-09 | 2.99E-08 | Over-expressed |
| CYHR1      | 0.74 | 2.38E-09 | 3.59E-08 | Over-expressed |
| BRMS1      | 0.74 | 2.88E-09 | 4.24E-08 | Over-expressed |
| WDR4       | 0.74 | 3.76E-08 | 3.88E-07 | Over-expressed |
| FBXL6      | 0.74 | 1.06E-07 | 9.40E-07 | Over-expressed |
| ZGLP1      | 0.74 | 6.99E-07 | 4.71E-06 | Over-expressed |
| TACC3      | 0.74 | 1.18E-05 | 5.43E-05 | Over-expressed |
| TYROBP     | 0.74 | 1.43E-05 | 6.42E-05 | Over-expressed |
| SFXN3      | 0.74 | 2.25E-05 | 9.50E-05 | Over-expressed |
| AURKC      | 0.74 | 2.90E-05 | 1.19E-04 | Over-expressed |
| MFSD3      | 0.74 | 1.96E-04 | 6.33E-04 | Over-expressed |
| WDR62      | 0.74 | 6.92E-04 | 1.89E-03 | Over-expressed |
| C1QA       | 0.74 | 1.08E-03 | 2.78E-03 | Over-expressed |

|          |      |          |          |                |
|----------|------|----------|----------|----------------|
| SNHG15   | 0.74 | 1.48E-03 | 3.65E-03 | Over-expressed |
| CD2      | 0.74 | 2.35E-03 | 5.50E-03 | Over-expressed |
| NCS1     | 0.74 | 2.53E-03 | 5.86E-03 | Over-expressed |
| TIMP1    | 0.74 | 6.20E-03 | 0.0128   | Over-expressed |
| EXOSC1   | 0.73 | 2.64E-16 | 3.00E-14 | Over-expressed |
| EIF3B    | 0.73 | 1.36E-11 | 4.45E-10 | Over-expressed |
| HIGD2A   | 0.73 | 4.46E-11 | 1.25E-09 | Over-expressed |
| ARL16    | 0.73 | 1.47E-10 | 3.38E-09 | Over-expressed |
| TMA7     | 0.73 | 7.74E-10 | 1.38E-08 | Over-expressed |
| SCNM1    | 0.73 | 1.51E-09 | 2.41E-08 | Over-expressed |
| EEF1E1   | 0.73 | 1.51E-09 | 2.41E-08 | Over-expressed |
| PSENEN   | 0.73 | 4.11E-09 | 5.75E-08 | Over-expressed |
| KPTN     | 0.73 | 1.10E-08 | 1.33E-07 | Over-expressed |
| RASA4CP  | 0.73 | 7.86E-08 | 7.26E-07 | Over-expressed |
| P2RX4    | 0.73 | 1.16E-07 | 1.02E-06 | Over-expressed |
| ANXA2    | 0.73 | 3.27E-07 | 2.45E-06 | Over-expressed |
| CENPP    | 0.73 | 1.54E-06 | 9.21E-06 | Over-expressed |
| MICAL1   | 0.73 | 7.78E-06 | 3.77E-05 | Over-expressed |
| IGFBP6   | 0.73 | 2.14E-04 | 6.83E-04 | Over-expressed |
| CAPS     | 0.73 | 3.44E-04 | 1.03E-03 | Over-expressed |
| TOR4A    | 0.73 | 5.64E-04 | 1.58E-03 | Over-expressed |
| CST7     | 0.73 | 2.78E-03 | 6.37E-03 | Over-expressed |
| CCL5     | 0.73 | 5.15E-03 | 0.0109   | Over-expressed |
| NUTF2    | 0.72 | 3.68E-13 | 1.96E-11 | Over-expressed |
| SNRPA1   | 0.72 | 9.64E-12 | 3.33E-10 | Over-expressed |
| SFXN4    | 0.72 | 1.40E-11 | 4.55E-10 | Over-expressed |
| MRPL11   | 0.72 | 2.80E-11 | 8.42E-10 | Over-expressed |
| BNIP1    | 0.72 | 3.18E-11 | 9.36E-10 | Over-expressed |
| SSBP4    | 0.72 | 5.76E-10 | 1.08E-08 | Over-expressed |
| SNRPGP15 | 0.72 | 7.08E-10 | 1.27E-08 | Over-expressed |
| MRPS24   | 0.72 | 1.01E-08 | 1.24E-07 | Over-expressed |
| KLHDC4   | 0.72 | 5.57E-08 | 5.38E-07 | Over-expressed |
| SF3B5    | 0.72 | 6.15E-08 | 5.86E-07 | Over-expressed |
| TUBA1C   | 0.72 | 1.28E-07 | 1.11E-06 | Over-expressed |
| SSR4     | 0.72 | 3.30E-07 | 2.47E-06 | Over-expressed |
| ATP5MF   | 0.72 | 8.29E-07 | 5.43E-06 | Over-expressed |
| LRRC61   | 0.72 | 1.16E-06 | 7.24E-06 | Over-expressed |
| RRP7A    | 0.72 | 1.51E-06 | 9.07E-06 | Over-expressed |
| PLEKHG2  | 0.72 | 1.65E-06 | 9.77E-06 | Over-expressed |
| KCNMB3   | 0.72 | 4.31E-06 | 2.26E-05 | Over-expressed |
| C17ORF53 | 0.72 | 1.82E-05 | 7.91E-05 | Over-expressed |
| SMYD3    | 0.72 | 1.85E-05 | 8.01E-05 | Over-expressed |
| ATP5F1D  | 0.72 | 2.77E-05 | 1.14E-04 | Over-expressed |
| LY86     | 0.72 | 5.47E-05 | 2.07E-04 | Over-expressed |
| PSMB10   | 0.72 | 6.44E-05 | 2.38E-04 | Over-expressed |
| TRPM2    | 0.72 | 3.69E-04 | 1.10E-03 | Over-expressed |
| TEDC2    | 0.72 | 5.77E-04 | 1.61E-03 | Over-expressed |
| SKA3     | 0.72 | 5.86E-04 | 1.63E-03 | Over-expressed |
| PLAUR    | 0.72 | 1.03E-03 | 2.68E-03 | Over-expressed |
| RPP25    | 0.72 | 1.26E-03 | 3.17E-03 | Over-expressed |
| CD72     | 0.72 | 3.61E-03 | 7.98E-03 | Over-expressed |
| SPECC1   | 0.72 | 0.0151   | 0.028    | Over-expressed |
| FCHO1    | 0.72 | 0.0211   | 0.0376   | Over-expressed |
| SARNP    | 0.71 | 1.56E-14 | 1.26E-12 | Over-expressed |
| ERGIC3   | 0.71 | 9.78E-14 | 6.43E-12 | Over-expressed |
| NFKBIL1  | 0.71 | 1.46E-13 | 9.26E-12 | Over-expressed |
| NELFE    | 0.71 | 3.69E-13 | 1.96E-11 | Over-expressed |



|           |      |          |          |                |
|-----------|------|----------|----------|----------------|
| ATIC      | 0.71 | 9.68E-13 | 4.52E-11 | Over-expressed |
| PFN1      | 0.71 | 1.52E-11 | 4.91E-10 | Over-expressed |
| TMEM101   | 0.71 | 1.05E-10 | 2.58E-09 | Over-expressed |
| RP9       | 0.71 | 4.68E-10 | 9.09E-09 | Over-expressed |
| PDCD5     | 0.71 | 6.15E-10 | 1.13E-08 | Over-expressed |
| KIAA0930  | 0.71 | 7.80E-10 | 1.39E-08 | Over-expressed |
| WDR74     | 0.71 | 9.24E-10 | 1.60E-08 | Over-expressed |
| TXNL4A    | 0.71 | 1.29E-09 | 2.13E-08 | Over-expressed |
| PUS1      | 0.71 | 1.37E-09 | 2.23E-08 | Over-expressed |
| PPIAL4G   | 0.71 | 6.90E-09 | 8.95E-08 | Over-expressed |
| C8ORF44   | 0.71 | 7.74E-09 | 9.86E-08 | Over-expressed |
| SPSB2     | 0.71 | 1.53E-08 | 1.77E-07 | Over-expressed |
| RPSAP9    | 0.71 | 1.97E-08 | 2.21E-07 | Over-expressed |
| RPF2      | 0.71 | 3.41E-08 | 3.55E-07 | Over-expressed |
| PUF60     | 0.71 | 5.43E-08 | 5.28E-07 | Over-expressed |
| HGH1      | 0.71 | 8.83E-08 | 8.05E-07 | Over-expressed |
| BCL2L12   | 0.71 | 1.03E-07 | 9.15E-07 | Over-expressed |
| ZNF775    | 0.71 | 6.50E-07 | 4.44E-06 | Over-expressed |
| FXD5      | 0.71 | 4.86E-05 | 1.86E-04 | Over-expressed |
| ARHGAP4   | 0.71 | 5.28E-05 | 2.00E-04 | Over-expressed |
| NCF4      | 0.71 | 7.88E-05 | 2.85E-04 | Over-expressed |
| OSBPL7    | 0.71 | 1.40E-04 | 4.70E-04 | Over-expressed |
| RHOH      | 0.71 | 2.30E-03 | 5.40E-03 | Over-expressed |
| TRIM7     | 0.71 | 3.16E-03 | 7.12E-03 | Over-expressed |
| EPOP      | 0.71 | 7.75E-03 | 0.0156   | Over-expressed |
| FKBP1A    | 0.7  | 1.48E-13 | 9.36E-12 | Over-expressed |
| PPIA      | 0.7  | 2.73E-12 | 1.11E-10 | Over-expressed |
| PRR3      | 0.7  | 4.28E-12 | 1.61E-10 | Over-expressed |
| SMIM26    | 0.7  | 9.95E-12 | 3.41E-10 | Over-expressed |
| TARBP2    | 0.7  | 1.15E-11 | 3.84E-10 | Over-expressed |
| DGUOK     | 0.7  | 4.48E-11 | 1.25E-09 | Over-expressed |
| RRP1      | 0.7  | 4.29E-10 | 8.47E-09 | Over-expressed |
| FAU       | 0.7  | 1.98E-09 | 3.05E-08 | Over-expressed |
| NDUFS5    | 0.7  | 1.60E-08 | 1.85E-07 | Over-expressed |
| FAM110A   | 0.7  | 4.21E-08 | 4.26E-07 | Over-expressed |
| RNF181    | 0.7  | 4.97E-08 | 4.91E-07 | Over-expressed |
| GOLGA6L9  | 0.7  | 9.32E-08 | 8.43E-07 | Over-expressed |
| TBCB      | 0.7  | 1.13E-07 | 9.95E-07 | Over-expressed |
| KRT10     | 0.7  | 1.74E-07 | 1.44E-06 | Over-expressed |
| PDCD2L    | 0.7  | 1.82E-07 | 1.50E-06 | Over-expressed |
| STYXL1    | 0.7  | 3.04E-07 | 2.30E-06 | Over-expressed |
| EDF1      | 0.7  | 8.59E-07 | 5.61E-06 | Over-expressed |
| SLIRP     | 0.7  | 1.08E-06 | 6.81E-06 | Over-expressed |
| NSUN5P1   | 0.7  | 1.16E-05 | 5.35E-05 | Over-expressed |
| C19ORF24  | 0.7  | 1.21E-05 | 5.56E-05 | Over-expressed |
| LOC401052 | 0.7  | 2.17E-05 | 9.20E-05 | Over-expressed |
| CKS2      | 0.7  | 2.65E-05 | 1.10E-04 | Over-expressed |
| LAT       | 0.7  | 3.41E-05 | 1.37E-04 | Over-expressed |
| PGF       | 0.7  | 6.50E-05 | 2.40E-04 | Over-expressed |
| NUDT14    | 0.7  | 1.50E-04 | 4.99E-04 | Over-expressed |
| ORAI2     | 0.7  | 1.83E-04 | 5.95E-04 | Over-expressed |
| CCDC28B   | 0.7  | 6.25E-04 | 1.73E-03 | Over-expressed |
| CCNE1     | 0.7  | 1.48E-03 | 3.66E-03 | Over-expressed |
| CITED4    | 0.7  | 1.74E-03 | 4.21E-03 | Over-expressed |
| PFKFB4    | 0.7  | 2.15E-03 | 5.10E-03 | Over-expressed |
| TRIM16    | 0.7  | 3.75E-03 | 8.25E-03 | Over-expressed |
| CGREF1    | 0.7  | 0.0156   | 0.0288   | Over-expressed |

|           |      |          |          |                |
|-----------|------|----------|----------|----------------|
| CSNK2B    | 0.69 | 6.04E-17 | 8.37E-15 | Over-expressed |
| MRPS26    | 0.69 | 1.03E-11 | 3.51E-10 | Over-expressed |
| PES1      | 0.69 | 7.97E-11 | 2.04E-09 | Over-expressed |
| MRPL51    | 0.69 | 6.28E-10 | 1.15E-08 | Over-expressed |
| FKBP1     | 0.69 | 3.72E-09 | 5.27E-08 | Over-expressed |
| NCBP2AS2  | 0.69 | 6.26E-09 | 8.23E-08 | Over-expressed |
| HSPBP1    | 0.69 | 6.72E-09 | 8.76E-08 | Over-expressed |
| AARSD1    | 0.69 | 7.02E-09 | 9.06E-08 | Over-expressed |
| SAMD10    | 0.69 | 1.43E-08 | 1.67E-07 | Over-expressed |
| RANBP1    | 0.69 | 3.14E-08 | 3.32E-07 | Over-expressed |
| HYPK      | 0.69 | 3.94E-08 | 4.04E-07 | Over-expressed |
| STX8      | 0.69 | 6.28E-08 | 5.96E-07 | Over-expressed |
| PSMG4     | 0.69 | 1.13E-07 | 9.91E-07 | Over-expressed |
| GMNN      | 0.69 | 6.75E-07 | 4.58E-06 | Over-expressed |
| MDP1      | 0.69 | 7.97E-07 | 5.25E-06 | Over-expressed |
| FDX2      | 0.69 | 9.02E-07 | 5.84E-06 | Over-expressed |
| NEURL2    | 0.69 | 9.93E-07 | 6.35E-06 | Over-expressed |
| RRS1      | 0.69 | 2.05E-06 | 1.18E-05 | Over-expressed |
| DENND6B   | 0.69 | 2.45E-06 | 1.38E-05 | Over-expressed |
| CYC1      | 0.69 | 2.80E-06 | 1.55E-05 | Over-expressed |
| SWI5      | 0.69 | 5.20E-06 | 2.65E-05 | Over-expressed |
| CENPH     | 0.69 | 5.92E-06 | 2.97E-05 | Over-expressed |
| APRT      | 0.69 | 8.44E-06 | 4.05E-05 | Over-expressed |
| NRM       | 0.69 | 1.03E-05 | 4.80E-05 | Over-expressed |
| ADAT3     | 0.69 | 1.48E-05 | 6.58E-05 | Over-expressed |
| S100A10   | 0.69 | 2.24E-05 | 9.48E-05 | Over-expressed |
| MAGED1    | 0.69 | 4.20E-05 | 1.64E-04 | Over-expressed |
| SHC2      | 0.69 | 8.28E-05 | 2.97E-04 | Over-expressed |
| ISG20     | 0.69 | 1.61E-04 | 5.32E-04 | Over-expressed |
| SMIM4     | 0.69 | 1.94E-04 | 6.28E-04 | Over-expressed |
| LPCAT4    | 0.69 | 5.03E-04 | 1.43E-03 | Over-expressed |
| EBI3      | 0.69 | 6.29E-04 | 1.73E-03 | Over-expressed |
| ID1       | 0.69 | 7.40E-03 | 0.015    | Over-expressed |
| CEACAM21  | 0.69 | 9.63E-03 | 0.0189   | Over-expressed |
| SLC38A1   | 0.69 | 9.96E-03 | 0.0194   | Over-expressed |
| LY96      | 0.69 | 0.0131   | 0.0246   | Over-expressed |
| TPD52L2   | 0.68 | 8.75E-14 | 5.89E-12 | Over-expressed |
| BTF3      | 0.68 | 2.65E-13 | 1.54E-11 | Over-expressed |
| CTDNEP1   | 0.68 | 1.84E-12 | 8.08E-11 | Over-expressed |
| ARFGAP1   | 0.68 | 4.81E-12 | 1.79E-10 | Over-expressed |
| C12ORF73  | 0.68 | 2.86E-11 | 8.54E-10 | Over-expressed |
| WASH3P    | 0.68 | 5.64E-11 | 1.53E-09 | Over-expressed |
| MRPL17    | 0.68 | 8.65E-11 | 2.19E-09 | Over-expressed |
| AP4M1     | 0.68 | 5.24E-10 | 9.98E-09 | Over-expressed |
| SMPD2     | 0.68 | 6.89E-10 | 1.24E-08 | Over-expressed |
| TRIR      | 0.68 | 2.88E-09 | 4.24E-08 | Over-expressed |
| COX19     | 0.68 | 4.47E-09 | 6.16E-08 | Over-expressed |
| SSNA1     | 0.68 | 8.03E-09 | 1.02E-07 | Over-expressed |
| FRAT2     | 0.68 | 9.52E-09 | 1.18E-07 | Over-expressed |
| ANKS3     | 0.68 | 2.47E-08 | 2.69E-07 | Over-expressed |
| PSMB6     | 0.68 | 4.15E-08 | 4.20E-07 | Over-expressed |
| CHCHD7    | 0.68 | 3.23E-07 | 2.43E-06 | Over-expressed |
| FBXL15    | 0.68 | 3.31E-07 | 2.48E-06 | Over-expressed |
| TAPT1-AS1 | 0.68 | 7.96E-07 | 5.24E-06 | Over-expressed |
| UBXN11    | 0.68 | 1.25E-06 | 7.70E-06 | Over-expressed |
| SRM       | 0.68 | 1.38E-06 | 8.39E-06 | Over-expressed |
| HSBP1L1   | 0.68 | 4.66E-06 | 2.41E-05 | Over-expressed |

|          |      |          |          |                |
|----------|------|----------|----------|----------------|
| NENF     | 0.68 | 8.67E-06 | 4.15E-05 | Over-expressed |
| ARHGEF2  | 0.68 | 1.84E-05 | 7.97E-05 | Over-expressed |
| HILPDA   | 0.68 | 8.49E-05 | 3.04E-04 | Over-expressed |
| CHMP4A   | 0.68 | 1.11E-04 | 3.84E-04 | Over-expressed |
| SEMA4D   | 0.68 | 2.08E-04 | 6.65E-04 | Over-expressed |
| ARHGAP9  | 0.68 | 2.38E-04 | 7.48E-04 | Over-expressed |
| ZNF165   | 0.68 | 3.68E-04 | 1.10E-03 | Over-expressed |
| OIP5     | 0.68 | 5.28E-04 | 1.50E-03 | Over-expressed |
| TEAD2    | 0.68 | 7.05E-04 | 1.92E-03 | Over-expressed |
| BCL2A1   | 0.68 | 4.13E-03 | 8.99E-03 | Over-expressed |
| BEX3     | 0.68 | 8.75E-03 | 0.0174   | Over-expressed |
| SKAP1    | 0.68 | 0.0121   | 0.0231   | Over-expressed |
| MUSTN1   | 0.68 | 0.0139   | 0.0261   | Over-expressed |
| TIMM9    | 0.67 | 4.20E-14 | 3.08E-12 | Over-expressed |
| COMMD7   | 0.67 | 5.52E-13 | 2.76E-11 | Over-expressed |
| UBXN1    | 0.67 | 3.94E-12 | 1.51E-10 | Over-expressed |
| PRPF6    | 0.67 | 4.52E-12 | 1.70E-10 | Over-expressed |
| EIF3D    | 0.67 | 7.78E-12 | 2.72E-10 | Over-expressed |
| HM13     | 0.67 | 5.90E-11 | 1.57E-09 | Over-expressed |
| BANF1    | 0.67 | 1.20E-10 | 2.86E-09 | Over-expressed |
| UQCRH    | 0.67 | 1.35E-10 | 3.17E-09 | Over-expressed |
| TMEM234  | 0.67 | 5.02E-10 | 9.59E-09 | Over-expressed |
| EFNA4    | 0.67 | 8.24E-10 | 1.46E-08 | Over-expressed |
| UCK2     | 0.67 | 1.90E-08 | 2.16E-07 | Over-expressed |
| PTGES2   | 0.67 | 1.07E-07 | 9.44E-07 | Over-expressed |
| ZNF524   | 0.67 | 5.05E-07 | 3.56E-06 | Over-expressed |
| FAM207A  | 0.67 | 1.39E-06 | 8.41E-06 | Over-expressed |
| MRPL27   | 0.67 | 5.16E-06 | 2.64E-05 | Over-expressed |
| ACVR2B   | 0.67 | 7.77E-06 | 3.77E-05 | Over-expressed |
| ELOB     | 0.67 | 9.98E-06 | 4.69E-05 | Over-expressed |
| PDLIM7   | 0.67 | 1.79E-05 | 7.76E-05 | Over-expressed |
| SNX22    | 0.67 | 8.57E-05 | 3.07E-04 | Over-expressed |
| RNF227   | 0.67 | 1.46E-04 | 4.87E-04 | Over-expressed |
| APOBEC3F | 0.67 | 1.78E-04 | 5.80E-04 | Over-expressed |
| H2AFJ    | 0.67 | 2.14E-04 | 6.83E-04 | Over-expressed |
| EMP3     | 0.67 | 2.15E-04 | 6.83E-04 | Over-expressed |
| CPT1B    | 0.67 | 2.96E-04 | 9.04E-04 | Over-expressed |
| GBGT1    | 0.67 | 3.57E-04 | 1.07E-03 | Over-expressed |
| PWWP2B   | 0.67 | 4.58E-04 | 1.32E-03 | Over-expressed |
| NCAPG    | 0.67 | 6.16E-04 | 1.70E-03 | Over-expressed |
| CHAF1B   | 0.67 | 6.69E-04 | 1.84E-03 | Over-expressed |
| KIFC1    | 0.67 | 9.15E-04 | 2.41E-03 | Over-expressed |
| CCL4L1   | 0.67 | 3.68E-03 | 8.10E-03 | Over-expressed |
| P2RY6    | 0.67 | 6.92E-03 | 0.0142   | Over-expressed |
| SPAG4    | 0.67 | 9.28E-03 | 0.0183   | Over-expressed |
| EIF2S2   | 0.66 | 5.45E-17 | 7.63E-15 | Over-expressed |
| RPAIN    | 0.66 | 1.75E-11 | 5.52E-10 | Over-expressed |
| REXO4    | 0.66 | 2.86E-10 | 5.94E-09 | Over-expressed |
| PRPF31   | 0.66 | 5.74E-10 | 1.07E-08 | Over-expressed |
| TYSND1   | 0.66 | 1.53E-09 | 2.44E-08 | Over-expressed |
| TPI1     | 0.66 | 6.05E-09 | 7.99E-08 | Over-expressed |
| PFDN6    | 0.66 | 2.22E-08 | 2.47E-07 | Over-expressed |
| UBE2M    | 0.66 | 2.26E-08 | 2.49E-07 | Over-expressed |
| RPL3     | 0.66 | 2.78E-08 | 2.98E-07 | Over-expressed |
| VOPP1    | 0.66 | 4.12E-08 | 4.18E-07 | Over-expressed |
| AGTRAP   | 0.66 | 5.89E-08 | 5.65E-07 | Over-expressed |
| HDDC3    | 0.66 | 5.97E-08 | 5.71E-07 | Over-expressed |

|           |      |          |          |                |
|-----------|------|----------|----------|----------------|
| ZBTB8OS   | 0.66 | 1.69E-07 | 1.41E-06 | Over-expressed |
| COMMD5    | 0.66 | 1.72E-07 | 1.43E-06 | Over-expressed |
| RPS19BP1  | 0.66 | 3.37E-07 | 2.51E-06 | Over-expressed |
| SCAND1    | 0.66 | 4.72E-07 | 3.35E-06 | Over-expressed |
| U2AF1L4   | 0.66 | 1.24E-06 | 7.64E-06 | Over-expressed |
| NDUFA11   | 0.66 | 1.31E-06 | 7.98E-06 | Over-expressed |
| RRP7BP    | 0.66 | 1.53E-06 | 9.17E-06 | Over-expressed |
| GSDMD     | 0.66 | 1.86E-06 | 1.08E-05 | Over-expressed |
| PIM2      | 0.66 | 3.03E-06 | 1.66E-05 | Over-expressed |
| METTL26   | 0.66 | 3.14E-06 | 1.71E-05 | Over-expressed |
| ANAPC11   | 0.66 | 3.91E-06 | 2.08E-05 | Over-expressed |
| LAGE3     | 0.66 | 9.13E-06 | 4.34E-05 | Over-expressed |
| DSCC1     | 0.66 | 2.00E-05 | 8.57E-05 | Over-expressed |
| TIGD1     | 0.66 | 3.22E-05 | 1.30E-04 | Over-expressed |
| OSCAR     | 0.66 | 4.47E-05 | 1.73E-04 | Over-expressed |
| LHFPL2    | 0.66 | 5.66E-05 | 2.13E-04 | Over-expressed |
| DNAH17    | 0.66 | 4.08E-04 | 1.20E-03 | Over-expressed |
| SPIRE2    | 0.66 | 6.10E-04 | 1.69E-03 | Over-expressed |
| PKMYT1    | 0.66 | 1.92E-03 | 4.59E-03 | Over-expressed |
| BLM       | 0.66 | 3.26E-03 | 7.32E-03 | Over-expressed |
| ABCA3     | 0.66 | 6.41E-03 | 0.0132   | Over-expressed |
| CARD11    | 0.66 | 7.46E-03 | 0.0151   | Over-expressed |
| GZMA      | 0.66 | 8.60E-03 | 0.0171   | Over-expressed |
| TET1      | 0.66 | 8.84E-03 | 0.0175   | Over-expressed |
| METTL27   | 0.66 | 9.00E-03 | 0.0178   | Over-expressed |
| ARPC3     | 0.65 | 4.11E-14 | 3.04E-12 | Over-expressed |
| NOL7      | 0.65 | 4.21E-14 | 3.08E-12 | Over-expressed |
| WDR46     | 0.65 | 2.94E-12 | 1.17E-10 | Over-expressed |
| ANP32B    | 0.65 | 3.80E-11 | 1.09E-09 | Over-expressed |
| MKKS      | 0.65 | 5.79E-11 | 1.55E-09 | Over-expressed |
| RALY      | 0.65 | 1.32E-10 | 3.11E-09 | Over-expressed |
| ZNF232    | 0.65 | 1.47E-10 | 3.39E-09 | Over-expressed |
| C1QBP     | 0.65 | 1.41E-09 | 2.28E-08 | Over-expressed |
| MGC16275  | 0.65 | 2.84E-09 | 4.18E-08 | Over-expressed |
| SPAG7     | 0.65 | 1.68E-08 | 1.93E-07 | Over-expressed |
| TCIRG1    | 0.65 | 3.89E-08 | 3.99E-07 | Over-expressed |
| ZFAND2B   | 0.65 | 1.78E-07 | 1.47E-06 | Over-expressed |
| LZTS2     | 0.65 | 1.83E-07 | 1.50E-06 | Over-expressed |
| COA3      | 0.65 | 2.05E-07 | 1.65E-06 | Over-expressed |
| ERCC1     | 0.65 | 2.38E-07 | 1.87E-06 | Over-expressed |
| TRAPPC2L  | 0.65 | 1.21E-06 | 7.51E-06 | Over-expressed |
| DOK1      | 0.65 | 4.32E-06 | 2.27E-05 | Over-expressed |
| PSMB3     | 0.65 | 7.74E-06 | 3.76E-05 | Over-expressed |
| TUBB6     | 0.65 | 2.51E-05 | 1.05E-04 | Over-expressed |
| C9ORF16   | 0.65 | 4.08E-05 | 1.60E-04 | Over-expressed |
| GMFG      | 0.65 | 1.15E-04 | 3.97E-04 | Over-expressed |
| COTL1     | 0.65 | 1.71E-04 | 5.61E-04 | Over-expressed |
| TKT       | 0.65 | 2.01E-04 | 6.48E-04 | Over-expressed |
| IL1R2     | 0.65 | 8.82E-04 | 2.34E-03 | Over-expressed |
| PLEKHA4   | 0.65 | 1.24E-03 | 3.12E-03 | Over-expressed |
| NFE2L3    | 0.65 | 1.39E-03 | 3.47E-03 | Over-expressed |
| MND1      | 0.65 | 1.57E-03 | 3.86E-03 | Over-expressed |
| LINC01134 | 0.65 | 2.34E-03 | 5.49E-03 | Over-expressed |
| ORC6      | 0.65 | 2.88E-03 | 6.57E-03 | Over-expressed |
| FLVCR1-DT | 0.65 | 3.56E-03 | 7.89E-03 | Over-expressed |
| TGFB1     | 0.65 | 4.57E-03 | 9.85E-03 | Over-expressed |
| CD8A      | 0.65 | 0.0191   | 0.0344   | Over-expressed |

|          |      |          |          |                |
|----------|------|----------|----------|----------------|
| SNU13    | 0.64 | 3.42E-12 | 1.34E-10 | Over-expressed |
| FAM136A  | 0.64 | 5.67E-11 | 1.54E-09 | Over-expressed |
| JMJD6    | 0.64 | 8.79E-11 | 2.20E-09 | Over-expressed |
| STK19    | 0.64 | 4.14E-10 | 8.20E-09 | Over-expressed |
| TRMT1    | 0.64 | 5.42E-10 | 1.03E-08 | Over-expressed |
| SSR2     | 0.64 | 1.30E-09 | 2.13E-08 | Over-expressed |
| RUVBL2   | 0.64 | 5.40E-09 | 7.28E-08 | Over-expressed |
| HDDC2    | 0.64 | 6.57E-09 | 8.59E-08 | Over-expressed |
| TIMM50   | 0.64 | 4.12E-08 | 4.18E-07 | Over-expressed |
| NDRG3    | 0.64 | 4.86E-08 | 4.81E-07 | Over-expressed |
| RBM42    | 0.64 | 5.10E-08 | 5.03E-07 | Over-expressed |
| SVBP     | 0.64 | 7.78E-08 | 7.19E-07 | Over-expressed |
| BAK1     | 0.64 | 2.13E-07 | 1.71E-06 | Over-expressed |
| BZW2     | 0.64 | 2.30E-07 | 1.82E-06 | Over-expressed |
| AHCY     | 0.64 | 3.05E-07 | 2.31E-06 | Over-expressed |
| SMG9     | 0.64 | 6.71E-07 | 4.56E-06 | Over-expressed |
| ANKRD13D | 0.64 | 1.06E-06 | 6.71E-06 | Over-expressed |
| SRI      | 0.64 | 2.85E-06 | 1.57E-05 | Over-expressed |
| COX4I1   | 0.64 | 1.96E-05 | 8.44E-05 | Over-expressed |
| CCNB1IP1 | 0.64 | 3.13E-05 | 1.27E-04 | Over-expressed |
| IRF7     | 0.64 | 5.64E-05 | 2.13E-04 | Over-expressed |
| PAXX     | 0.64 | 6.08E-05 | 2.26E-04 | Over-expressed |
| UCP2     | 0.64 | 4.11E-04 | 1.20E-03 | Over-expressed |
| DOK2     | 0.64 | 7.10E-04 | 1.93E-03 | Over-expressed |
| E2F2     | 0.64 | 8.59E-04 | 2.29E-03 | Over-expressed |
| ARL4C    | 0.64 | 9.14E-04 | 2.41E-03 | Over-expressed |
| A2M-AS1  | 0.64 | 9.22E-04 | 2.43E-03 | Over-expressed |
| TCTEX1D2 | 0.64 | 1.22E-03 | 3.08E-03 | Over-expressed |
| SLC7A7   | 0.64 | 1.54E-03 | 3.78E-03 | Over-expressed |
| KCNQ1OT1 | 0.64 | 2.01E-03 | 4.79E-03 | Over-expressed |
| ADGRE5   | 0.64 | 2.33E-03 | 5.46E-03 | Over-expressed |
| CDCA2    | 0.64 | 2.63E-03 | 6.07E-03 | Over-expressed |
| DAGLA    | 0.64 | 4.24E-03 | 9.20E-03 | Over-expressed |
| CPVL     | 0.64 | 9.33E-03 | 0.0184   | Over-expressed |
| TPPP3    | 0.64 | 0.0102   | 0.0198   | Over-expressed |
| WTIP     | 0.64 | 0.0114   | 0.0218   | Over-expressed |
| PRR13    | 0.63 | 3.87E-13 | 2.03E-11 | Over-expressed |
| GAR1     | 0.63 | 2.00E-11 | 6.26E-10 | Over-expressed |
| RNF149   | 0.63 | 2.85E-11 | 8.54E-10 | Over-expressed |
| PPP2R1A  | 0.63 | 1.10E-10 | 2.68E-09 | Over-expressed |
| CLTA     | 0.63 | 2.44E-10 | 5.21E-09 | Over-expressed |
| RAN      | 0.63 | 1.06E-09 | 1.80E-08 | Over-expressed |
| CDK7     | 0.63 | 1.68E-09 | 2.66E-08 | Over-expressed |
| TIMM22   | 0.63 | 3.37E-09 | 4.85E-08 | Over-expressed |
| POP7     | 0.63 | 3.83E-09 | 5.40E-08 | Over-expressed |
| MYL6     | 0.63 | 5.05E-09 | 6.84E-08 | Over-expressed |
| ELP5     | 0.63 | 7.22E-09 | 9.30E-08 | Over-expressed |
| PIH1D1   | 0.63 | 1.67E-08 | 1.91E-07 | Over-expressed |
| SNRNP35  | 0.63 | 7.03E-08 | 6.58E-07 | Over-expressed |
| TAF10    | 0.63 | 8.16E-08 | 7.49E-07 | Over-expressed |
| COX7C    | 0.63 | 9.11E-08 | 8.27E-07 | Over-expressed |
| CPSF4    | 0.63 | 9.63E-08 | 8.67E-07 | Over-expressed |
| RPS26    | 0.63 | 1.02E-07 | 9.12E-07 | Over-expressed |
| CLEC2D   | 0.63 | 1.32E-07 | 1.14E-06 | Over-expressed |
| C8ORF33  | 0.63 | 1.72E-07 | 1.43E-06 | Over-expressed |
| FAAP20   | 0.63 | 2.25E-07 | 1.78E-06 | Over-expressed |
| TRMU     | 0.63 | 4.17E-07 | 3.02E-06 | Over-expressed |

|          |      |          |          |                |
|----------|------|----------|----------|----------------|
| MTG1     | 0.63 | 4.92E-07 | 3.48E-06 | Over-expressed |
| ARL6IP4  | 0.63 | 5.19E-07 | 3.64E-06 | Over-expressed |
| ZNRD2    | 0.63 | 1.01E-06 | 6.41E-06 | Over-expressed |
| RABL6    | 0.63 | 1.06E-06 | 6.71E-06 | Over-expressed |
| THAP3    | 0.63 | 1.10E-06 | 6.90E-06 | Over-expressed |
| TIMM8B   | 0.63 | 1.42E-06 | 8.59E-06 | Over-expressed |
| NME3     | 0.63 | 2.44E-06 | 1.37E-05 | Over-expressed |
| DDIT3    | 0.63 | 4.55E-06 | 2.37E-05 | Over-expressed |
| ENO1     | 0.63 | 7.95E-06 | 3.84E-05 | Over-expressed |
| TBKBP1   | 0.63 | 1.76E-05 | 7.65E-05 | Over-expressed |
| CST3     | 0.63 | 2.40E-05 | 1.01E-04 | Over-expressed |
| RNF24    | 0.63 | 2.65E-05 | 1.10E-04 | Over-expressed |
| PGP      | 0.63 | 4.91E-05 | 1.88E-04 | Over-expressed |
| PYCR3    | 0.63 | 5.23E-05 | 1.99E-04 | Over-expressed |
| MCM7     | 0.63 | 7.42E-05 | 2.70E-04 | Over-expressed |
| PSRC1    | 0.63 | 1.29E-04 | 4.40E-04 | Over-expressed |
| AGER     | 0.63 | 1.50E-04 | 5.00E-04 | Over-expressed |
| C1ORF162 | 0.63 | 3.51E-04 | 1.05E-03 | Over-expressed |
| FAM83H   | 0.63 | 5.14E-04 | 1.46E-03 | Over-expressed |
| TSPAN15  | 0.63 | 6.54E-03 | 0.0134   | Over-expressed |
| DIAPH3   | 0.63 | 8.33E-03 | 0.0167   | Over-expressed |
| EMID1    | 0.63 | 0.0163   | 0.0299   | Over-expressed |
| GSTM3    | 0.63 | 0.0196   | 0.0352   | Over-expressed |
| POLL     | 0.62 | 7.83E-16 | 7.86E-14 | Over-expressed |
| POLR1C   | 0.62 | 1.97E-12 | 8.49E-11 | Over-expressed |
| C18ORF21 | 0.62 | 2.36E-12 | 9.80E-11 | Over-expressed |
| FLOT1    | 0.62 | 2.48E-12 | 1.02E-10 | Over-expressed |
| QARS     | 0.62 | 2.95E-12 | 1.17E-10 | Over-expressed |
| SMYD5    | 0.62 | 3.97E-12 | 1.51E-10 | Over-expressed |
| MANBAL   | 0.62 | 5.67E-12 | 2.08E-10 | Over-expressed |
| ARFRP1   | 0.62 | 5.75E-11 | 1.55E-09 | Over-expressed |
| TRMT112  | 0.62 | 6.07E-11 | 1.61E-09 | Over-expressed |
| MFSD5    | 0.62 | 8.68E-11 | 2.19E-09 | Over-expressed |
| CHCHD1   | 0.62 | 9.08E-11 | 2.26E-09 | Over-expressed |
| TIMM17B  | 0.62 | 3.12E-10 | 6.40E-09 | Over-expressed |
| COA8     | 0.62 | 1.33E-09 | 2.18E-08 | Over-expressed |
| B3GALT6  | 0.62 | 1.70E-09 | 2.68E-08 | Over-expressed |
| ATP6V1F  | 0.62 | 2.80E-09 | 4.14E-08 | Over-expressed |
| TMEM11   | 0.62 | 3.02E-09 | 4.41E-08 | Over-expressed |
| NSUN5    | 0.62 | 2.42E-08 | 2.64E-07 | Over-expressed |
| SF3A2    | 0.62 | 7.43E-08 | 6.90E-07 | Over-expressed |
| UBL5     | 0.62 | 1.03E-07 | 9.17E-07 | Over-expressed |
| FKBP4    | 0.62 | 1.07E-07 | 9.45E-07 | Over-expressed |
| SELENOH  | 0.62 | 1.61E-07 | 1.35E-06 | Over-expressed |
| SMIM20   | 0.62 | 5.20E-07 | 3.65E-06 | Over-expressed |
| NSMCE2   | 0.62 | 5.94E-07 | 4.10E-06 | Over-expressed |
| ANAPC15  | 0.62 | 8.94E-07 | 5.80E-06 | Over-expressed |
| FBXW9    | 0.62 | 1.68E-06 | 9.97E-06 | Over-expressed |
| FAM41C   | 0.62 | 2.06E-06 | 1.18E-05 | Over-expressed |
| TRAPPC5  | 0.62 | 8.11E-06 | 3.91E-05 | Over-expressed |
| USE1     | 0.62 | 8.64E-06 | 4.14E-05 | Over-expressed |
| RABAC1   | 0.62 | 1.06E-05 | 4.94E-05 | Over-expressed |
| GPAA1    | 0.62 | 1.14E-05 | 5.28E-05 | Over-expressed |
| ARHGEF39 | 0.62 | 2.71E-05 | 1.12E-04 | Over-expressed |
| H1FX-AS1 | 0.62 | 4.30E-05 | 1.68E-04 | Over-expressed |
| EIF4EBP1 | 0.62 | 1.29E-04 | 4.39E-04 | Over-expressed |
| RCN1     | 0.62 | 1.35E-04 | 4.56E-04 | Over-expressed |

|          |      |          |          |                |
|----------|------|----------|----------|----------------|
| 9-Mar    | 0.62 | 1.75E-04 | 5.72E-04 | Over-expressed |
| LGALS9   | 0.62 | 1.94E-04 | 6.28E-04 | Over-expressed |
| LGALS1   | 0.62 | 4.03E-04 | 1.18E-03 | Over-expressed |
| PPP1R16A | 0.62 | 4.51E-04 | 1.31E-03 | Over-expressed |
| FANCD2   | 0.62 | 8.22E-04 | 2.20E-03 | Over-expressed |
| CEACAM19 | 0.62 | 8.35E-04 | 2.23E-03 | Over-expressed |
| TSPO     | 0.62 | 1.61E-03 | 3.93E-03 | Over-expressed |
| GALNT6   | 0.62 | 1.99E-03 | 4.75E-03 | Over-expressed |
| MVD      | 0.62 | 2.03E-03 | 4.83E-03 | Over-expressed |
| PTPN14   | 0.62 | 3.65E-03 | 8.05E-03 | Over-expressed |
| HJURP    | 0.62 | 6.77E-03 | 0.0139   | Over-expressed |
| WDR97    | 0.62 | 8.68E-03 | 0.0173   | Over-expressed |
| OSBP2    | 0.62 | 0.0122   | 0.0233   | Over-expressed |
| KIF15    | 0.62 | 0.0264   | 0.0458   | Over-expressed |
| TRIM16L  | 0.62 | 0.0285   | 0.0492   | Over-expressed |
| VDAC2    | 0.61 | 3.76E-13 | 1.98E-11 | Over-expressed |
| PCED1A   | 0.61 | 6.80E-12 | 2.45E-10 | Over-expressed |
| CCDC58   | 0.61 | 1.11E-11 | 3.74E-10 | Over-expressed |
| BSL      | 0.61 | 1.64E-10 | 3.72E-09 | Over-expressed |
| CHRA1    | 0.61 | 1.67E-09 | 2.64E-08 | Over-expressed |
| CD63     | 0.61 | 2.06E-09 | 3.15E-08 | Over-expressed |
| EXOSC8   | 0.61 | 2.42E-09 | 3.65E-08 | Over-expressed |
| CCDC137  | 0.61 | 4.50E-09 | 6.19E-08 | Over-expressed |
| UQRHL    | 0.61 | 7.56E-09 | 9.68E-08 | Over-expressed |
| LCMT1    | 0.61 | 1.20E-08 | 1.44E-07 | Over-expressed |
| EIF3G    | 0.61 | 1.43E-08 | 1.68E-07 | Over-expressed |
| PRH2     | 0.61 | 3.05E-08 | 3.24E-07 | Over-expressed |
| DNPH1    | 0.61 | 4.45E-08 | 4.45E-07 | Over-expressed |
| PRDX5    | 0.61 | 2.08E-07 | 1.67E-06 | Over-expressed |
| TWNK     | 0.61 | 7.45E-07 | 4.97E-06 | Over-expressed |
| ZNF358   | 0.61 | 1.04E-06 | 6.61E-06 | Over-expressed |
| MIIP     | 0.61 | 1.16E-06 | 7.23E-06 | Over-expressed |
| NT5C3B   | 0.61 | 1.45E-06 | 8.70E-06 | Over-expressed |
| MRPS21   | 0.61 | 2.13E-06 | 1.22E-05 | Over-expressed |
| C15ORF39 | 0.61 | 2.20E-06 | 1.25E-05 | Over-expressed |
| RPL19P12 | 0.61 | 2.71E-06 | 1.50E-05 | Over-expressed |
| NDUFS8   | 0.61 | 3.15E-06 | 1.71E-05 | Over-expressed |
| TEN1     | 0.61 | 3.49E-06 | 1.87E-05 | Over-expressed |
| DCAF13   | 0.61 | 3.70E-06 | 1.98E-05 | Over-expressed |
| ARPC1B   | 0.61 | 1.42E-05 | 6.37E-05 | Over-expressed |
| RDH13    | 0.61 | 2.16E-05 | 9.19E-05 | Over-expressed |
| CHEK1    | 0.61 | 3.11E-05 | 1.26E-04 | Over-expressed |
| MBLAC1   | 0.61 | 6.17E-05 | 2.29E-04 | Over-expressed |
| NDUFB7   | 0.61 | 1.60E-04 | 5.29E-04 | Over-expressed |
| RTL8A    | 0.61 | 1.99E-04 | 6.42E-04 | Over-expressed |
| RAB6B    | 0.61 | 3.40E-04 | 1.02E-03 | Over-expressed |
| VILL     | 0.61 | 1.39E-03 | 3.47E-03 | Over-expressed |
| PRELID2  | 0.61 | 3.28E-03 | 7.37E-03 | Over-expressed |
| EGFL7    | 0.61 | 3.57E-03 | 7.91E-03 | Over-expressed |
| TMEM86B  | 0.61 | 7.01E-03 | 0.0143   | Over-expressed |
| FABP3    | 0.61 | 8.23E-03 | 0.0165   | Over-expressed |
| NUF2     | 0.61 | 8.36E-03 | 0.0167   | Over-expressed |
| DLGAP5   | 0.61 | 0.013    | 0.0246   | Over-expressed |
| LRFN4    | 0.61 | 0.0219   | 0.0388   | Over-expressed |
| DYNLL1   | 0.6  | 2.20E-14 | 1.71E-12 | Over-expressed |
| SNRPB2   | 0.6  | 9.14E-14 | 6.08E-12 | Over-expressed |
| UFC1     | 0.6  | 7.33E-12 | 2.60E-10 | Over-expressed |

|            |      |          |          |                |
|------------|------|----------|----------|----------------|
| EIF5AL1    | 0.6  | 1.13E-10 | 2.72E-09 | Over-expressed |
| ATF4       | 0.6  | 2.44E-10 | 5.21E-09 | Over-expressed |
| AKAP8L     | 0.6  | 2.59E-10 | 5.49E-09 | Over-expressed |
| ASB1       | 0.6  | 1.70E-09 | 2.67E-08 | Over-expressed |
| MRPS18A    | 0.6  | 2.57E-09 | 3.83E-08 | Over-expressed |
| THOC5      | 0.6  | 5.01E-09 | 6.80E-08 | Over-expressed |
| UXT        | 0.6  | 5.45E-09 | 7.33E-08 | Over-expressed |
| SLC25A19   | 0.6  | 1.11E-08 | 1.35E-07 | Over-expressed |
| MED27      | 0.6  | 1.27E-08 | 1.51E-07 | Over-expressed |
| NDUFB2-AS1 | 0.6  | 3.95E-08 | 4.04E-07 | Over-expressed |
| SIRT6      | 0.6  | 3.99E-08 | 4.07E-07 | Over-expressed |
| ZNF485     | 0.6  | 4.51E-08 | 4.49E-07 | Over-expressed |
| MRPL33     | 0.6  | 5.71E-08 | 5.49E-07 | Over-expressed |
| SFT2D1     | 0.6  | 9.46E-08 | 8.53E-07 | Over-expressed |
| H2AFZ      | 0.6  | 1.60E-07 | 1.35E-06 | Over-expressed |
| MCAT       | 0.6  | 1.77E-07 | 1.46E-06 | Over-expressed |
| TATDN1     | 0.6  | 2.57E-07 | 1.99E-06 | Over-expressed |
| ZMAT5      | 0.6  | 2.75E-07 | 2.12E-06 | Over-expressed |
| SERGEF     | 0.6  | 3.34E-07 | 2.50E-06 | Over-expressed |
| POLR2J     | 0.6  | 3.51E-07 | 2.61E-06 | Over-expressed |
| OAZ1       | 0.6  | 4.43E-07 | 3.18E-06 | Over-expressed |
| CEP89      | 0.6  | 5.81E-07 | 4.03E-06 | Over-expressed |
| MPDU1      | 0.6  | 7.82E-07 | 5.17E-06 | Over-expressed |
| INO80C     | 0.6  | 5.73E-06 | 2.88E-05 | Over-expressed |
| HAUS7      | 0.6  | 6.03E-06 | 3.02E-05 | Over-expressed |
| LMCD1      | 0.6  | 1.68E-05 | 7.38E-05 | Over-expressed |
| TBC1D3B    | 0.6  | 3.14E-05 | 1.27E-04 | Over-expressed |
| C7ORF13    | 0.6  | 5.01E-05 | 1.91E-04 | Over-expressed |
| LOC728554  | 0.6  | 6.49E-05 | 2.39E-04 | Over-expressed |
| RTL8C      | 0.6  | 7.68E-05 | 2.78E-04 | Over-expressed |
| UQCR11     | 0.6  | 7.85E-05 | 2.84E-04 | Over-expressed |
| LRRC23     | 0.6  | 1.18E-04 | 4.06E-04 | Over-expressed |
| MMP25      | 0.6  | 2.07E-04 | 6.62E-04 | Over-expressed |
| CCDC24     | 0.6  | 3.85E-04 | 1.14E-03 | Over-expressed |
| PDE6G      | 0.6  | 6.15E-04 | 1.70E-03 | Over-expressed |
| CARD16     | 0.6  | 8.38E-04 | 2.23E-03 | Over-expressed |
| E2F1       | 0.6  | 1.73E-03 | 4.20E-03 | Over-expressed |
| DIPK1B     | 0.6  | 2.44E-03 | 5.68E-03 | Over-expressed |
| TCTN2      | 0.6  | 7.51E-03 | 0.0152   | Over-expressed |
| MEAK7      | 0.6  | 0.0112   | 0.0216   | Over-expressed |
| SNRPG      | 0.59 | 3.05E-13 | 1.73E-11 | Over-expressed |
| PA2G4      | 0.59 | 2.20E-12 | 9.32E-11 | Over-expressed |
| CHMP4B     | 0.59 | 3.98E-11 | 1.13E-09 | Over-expressed |
| RBM3       | 0.59 | 5.55E-11 | 1.52E-09 | Over-expressed |
| OST4       | 0.59 | 6.48E-11 | 1.70E-09 | Over-expressed |
| CNPY2      | 0.59 | 9.67E-11 | 2.40E-09 | Over-expressed |
| MRPL47     | 0.59 | 3.02E-10 | 6.22E-09 | Over-expressed |
| CDPF1      | 0.59 | 1.85E-09 | 2.88E-08 | Over-expressed |
| TTLL1      | 0.59 | 3.15E-08 | 3.32E-07 | Over-expressed |
| SNF8       | 0.59 | 3.24E-07 | 2.44E-06 | Over-expressed |
| MED30      | 0.59 | 4.62E-07 | 3.29E-06 | Over-expressed |
| MRPL21     | 0.59 | 7.84E-07 | 5.18E-06 | Over-expressed |
| CIB1       | 0.59 | 2.92E-06 | 1.60E-05 | Over-expressed |
| FTH1       | 0.59 | 3.27E-06 | 1.77E-05 | Over-expressed |
| GFER       | 0.59 | 6.51E-06 | 3.23E-05 | Over-expressed |
| CKAP4      | 0.59 | 6.55E-06 | 3.25E-05 | Over-expressed |
| NDUFA2     | 0.59 | 1.11E-05 | 5.15E-05 | Over-expressed |



|           |      |          |          |                |
|-----------|------|----------|----------|----------------|
| TRAPPC2B  | 0.59 | 1.13E-05 | 5.22E-05 | Over-expressed |
| DGAT1     | 0.59 | 1.75E-05 | 7.62E-05 | Over-expressed |
| POLE4     | 0.59 | 3.98E-05 | 1.57E-04 | Over-expressed |
| C7ORF50   | 0.59 | 5.83E-05 | 2.19E-04 | Over-expressed |
| POLR2L    | 0.59 | 6.78E-05 | 2.49E-04 | Over-expressed |
| FKBP2     | 0.59 | 7.22E-05 | 2.63E-04 | Over-expressed |
| FAM118A   | 0.59 | 9.45E-05 | 3.34E-04 | Over-expressed |
| QPCTL     | 0.59 | 9.81E-05 | 3.45E-04 | Over-expressed |
| LMNB2     | 0.59 | 1.59E-04 | 5.27E-04 | Over-expressed |
| CD300A    | 0.59 | 1.72E-04 | 5.64E-04 | Over-expressed |
| HAVCR2    | 0.59 | 1.92E-03 | 4.60E-03 | Over-expressed |
| VAV1      | 0.59 | 4.64E-03 | 9.98E-03 | Over-expressed |
| ARMC9     | 0.59 | 6.05E-03 | 0.0126   | Over-expressed |
| MYO1G     | 0.59 | 6.34E-03 | 0.0131   | Over-expressed |
| BRSK1     | 0.59 | 0.0104   | 0.0202   | Over-expressed |
| C15ORF40  | 0.58 | 6.13E-13 | 2.99E-11 | Over-expressed |
| EHMT2     | 0.58 | 5.33E-11 | 1.47E-09 | Over-expressed |
| TRIM65    | 0.58 | 1.13E-10 | 2.72E-09 | Over-expressed |
| TRIM11    | 0.58 | 6.09E-10 | 1.12E-08 | Over-expressed |
| URM1      | 0.58 | 2.36E-09 | 3.57E-08 | Over-expressed |
| CCT3      | 0.58 | 7.00E-09 | 9.05E-08 | Over-expressed |
| C10RF35   | 0.58 | 5.36E-08 | 5.24E-07 | Over-expressed |
| TSEN54    | 0.58 | 1.81E-07 | 1.49E-06 | Over-expressed |
| TMEM216   | 0.58 | 2.17E-07 | 1.73E-06 | Over-expressed |
| CPSF1     | 0.58 | 2.20E-07 | 1.75E-06 | Over-expressed |
| HCG18     | 0.58 | 3.63E-07 | 2.68E-06 | Over-expressed |
| HSCB      | 0.58 | 3.79E-07 | 2.77E-06 | Over-expressed |
| NDUFS4    | 0.58 | 1.85E-06 | 1.08E-05 | Over-expressed |
| JRK       | 0.58 | 2.06E-06 | 1.18E-05 | Over-expressed |
| RCN3      | 0.58 | 2.14E-06 | 1.22E-05 | Over-expressed |
| MRPS34    | 0.58 | 2.72E-06 | 1.50E-05 | Over-expressed |
| KLF16     | 0.58 | 3.84E-06 | 2.04E-05 | Over-expressed |
| NAA10     | 0.58 | 6.47E-06 | 3.22E-05 | Over-expressed |
| COX5B     | 0.58 | 7.88E-06 | 3.81E-05 | Over-expressed |
| CEMP1     | 0.58 | 1.08E-05 | 5.04E-05 | Over-expressed |
| TMEM164   | 0.58 | 1.27E-05 | 5.79E-05 | Over-expressed |
| RELB      | 0.58 | 1.32E-05 | 5.99E-05 | Over-expressed |
| CHKA      | 0.58 | 1.61E-05 | 7.09E-05 | Over-expressed |
| STMN1     | 0.58 | 5.63E-05 | 2.12E-04 | Over-expressed |
| CDCA4     | 0.58 | 5.66E-05 | 2.13E-04 | Over-expressed |
| REX1BD    | 0.58 | 8.79E-05 | 3.13E-04 | Over-expressed |
| PABPC1L   | 0.58 | 2.08E-04 | 6.66E-04 | Over-expressed |
| CHEK2     | 0.58 | 3.12E-04 | 9.47E-04 | Over-expressed |
| ZFAND2A   | 0.58 | 3.45E-04 | 1.03E-03 | Over-expressed |
| UPP1      | 0.58 | 3.78E-04 | 1.12E-03 | Over-expressed |
| SFI1      | 0.58 | 4.66E-04 | 1.34E-03 | Over-expressed |
| SNAI3-AS1 | 0.58 | 4.71E-04 | 1.35E-03 | Over-expressed |
| IFI30     | 0.58 | 5.55E-04 | 1.56E-03 | Over-expressed |
| CATSPER3  | 0.58 | 5.83E-04 | 1.62E-03 | Over-expressed |
| C8ORF82   | 0.58 | 7.35E-04 | 1.99E-03 | Over-expressed |
| NFATC4    | 0.58 | 3.68E-03 | 8.10E-03 | Over-expressed |
| CDK1      | 0.58 | 4.24E-03 | 9.20E-03 | Over-expressed |
| ETFB      | 0.58 | 4.66E-03 | 0.01     | Over-expressed |
| MAP4K1    | 0.58 | 4.77E-03 | 0.0102   | Over-expressed |
| CDKN3     | 0.58 | 5.95E-03 | 0.0124   | Over-expressed |
| REP15     | 0.58 | 7.80E-03 | 0.0157   | Over-expressed |
| HIC2      | 0.58 | 7.92E-03 | 0.0159   | Over-expressed |

|            |      |          |          |                |
|------------|------|----------|----------|----------------|
| CTSW       | 0.58 | 0.0283   | 0.0488   | Over-expressed |
| CERS5      | 0.57 | 1.66E-11 | 5.31E-10 | Over-expressed |
| ARPC4      | 0.57 | 1.59E-10 | 3.63E-09 | Over-expressed |
| RBM34      | 0.57 | 2.80E-10 | 5.85E-09 | Over-expressed |
| THOC6      | 0.57 | 7.85E-10 | 1.39E-08 | Over-expressed |
| GPS2       | 0.57 | 1.81E-09 | 2.83E-08 | Over-expressed |
| NUTM2A-AS1 | 0.57 | 5.35E-09 | 7.23E-08 | Over-expressed |
| NOB1       | 0.57 | 1.31E-08 | 1.56E-07 | Over-expressed |
| TRAF2      | 0.57 | 1.76E-08 | 2.01E-07 | Over-expressed |
| ZNF32      | 0.57 | 1.86E-08 | 2.12E-07 | Over-expressed |
| WDR83OS    | 0.57 | 2.14E-08 | 2.39E-07 | Over-expressed |
| SARS2      | 0.57 | 3.69E-08 | 3.82E-07 | Over-expressed |
| SMUG1      | 0.57 | 4.03E-08 | 4.11E-07 | Over-expressed |
| NME6       | 0.57 | 4.10E-08 | 4.17E-07 | Over-expressed |
| MRPS2      | 0.57 | 2.11E-07 | 1.69E-06 | Over-expressed |
| TSSC4      | 0.57 | 2.97E-07 | 2.26E-06 | Over-expressed |
| SERPINB6   | 0.57 | 6.00E-07 | 4.13E-06 | Over-expressed |
| PIIB       | 0.57 | 1.09E-06 | 6.86E-06 | Over-expressed |
| BORCS6     | 0.57 | 1.30E-06 | 7.96E-06 | Over-expressed |
| RANGAP1    | 0.57 | 2.63E-06 | 1.46E-05 | Over-expressed |
| ZNF428     | 0.57 | 2.82E-06 | 1.55E-05 | Over-expressed |
| NDUFB2     | 0.57 | 9.09E-06 | 4.33E-05 | Over-expressed |
| ARID5A     | 0.57 | 1.29E-05 | 5.86E-05 | Over-expressed |
| KMT5C      | 0.57 | 1.41E-05 | 6.33E-05 | Over-expressed |
| CHCHD5     | 0.57 | 1.42E-05 | 6.38E-05 | Over-expressed |
| LYSMD4     | 0.57 | 2.16E-05 | 9.17E-05 | Over-expressed |
| SOGA1      | 0.57 | 2.26E-05 | 9.54E-05 | Over-expressed |
| NME4       | 0.57 | 2.90E-05 | 1.19E-04 | Over-expressed |
| FBXO46     | 0.57 | 3.16E-05 | 1.28E-04 | Over-expressed |
| KIF9       | 0.57 | 3.76E-05 | 1.49E-04 | Over-expressed |
| CD68       | 0.57 | 6.33E-05 | 2.34E-04 | Over-expressed |
| EMC9       | 0.57 | 7.27E-05 | 2.65E-04 | Over-expressed |
| GNB1L      | 0.57 | 8.72E-05 | 3.11E-04 | Over-expressed |
| KLHDC8B    | 0.57 | 9.07E-05 | 3.22E-04 | Over-expressed |
| DYRK1B     | 0.57 | 1.20E-04 | 4.13E-04 | Over-expressed |
| LOC728743  | 0.57 | 2.39E-04 | 7.49E-04 | Over-expressed |
| GBAP1      | 0.57 | 5.96E-04 | 1.65E-03 | Over-expressed |
| CCDC107    | 0.57 | 7.02E-04 | 1.92E-03 | Over-expressed |
| DDX11      | 0.57 | 1.28E-03 | 3.21E-03 | Over-expressed |
| ASMTL-AS1  | 0.57 | 1.98E-03 | 4.71E-03 | Over-expressed |
| IGFLR1     | 0.57 | 2.25E-03 | 5.30E-03 | Over-expressed |
| FTL        | 0.57 | 5.67E-03 | 0.0119   | Over-expressed |
| TPX2       | 0.57 | 7.89E-03 | 0.0159   | Over-expressed |
| OSBPL10    | 0.57 | 0.0146   | 0.0272   | Over-expressed |
| SLC16A5    | 0.57 | 0.0165   | 0.0303   | Over-expressed |
| CXCR3      | 0.57 | 0.0174   | 0.0317   | Over-expressed |
| CSF3R      | 0.57 | 0.0199   | 0.0357   | Over-expressed |
| DNTTIP1    | 0.56 | 2.33E-12 | 9.72E-11 | Over-expressed |
| DNAJC7     | 0.56 | 4.77E-11 | 1.33E-09 | Over-expressed |
| GNL1       | 0.56 | 1.88E-09 | 2.91E-08 | Over-expressed |
| TRAPPC4    | 0.56 | 2.58E-09 | 3.84E-08 | Over-expressed |
| IGBP1      | 0.56 | 2.99E-08 | 3.18E-07 | Over-expressed |
| RBCK1      | 0.56 | 7.31E-08 | 6.80E-07 | Over-expressed |
| NOP10      | 0.56 | 1.23E-07 | 1.07E-06 | Over-expressed |
| MRPL53     | 0.56 | 3.85E-07 | 2.81E-06 | Over-expressed |
| METTL16    | 0.56 | 8.85E-07 | 5.75E-06 | Over-expressed |
| VASP       | 0.56 | 1.18E-06 | 7.31E-06 | Over-expressed |

|            |      |          |          |                |
|------------|------|----------|----------|----------------|
| MIER2      | 0.56 | 1.24E-06 | 7.65E-06 | Over-expressed |
| RCC2       | 0.56 | 3.27E-06 | 1.76E-05 | Over-expressed |
| DCTPP1     | 0.56 | 4.49E-06 | 2.34E-05 | Over-expressed |
| LOC388955  | 0.56 | 6.63E-06 | 3.28E-05 | Over-expressed |
| MFSD12     | 0.56 | 7.40E-06 | 3.61E-05 | Over-expressed |
| C8ORF76    | 0.56 | 7.93E-06 | 3.83E-05 | Over-expressed |
| DCLRE1C    | 0.56 | 9.93E-06 | 4.66E-05 | Over-expressed |
| UQCR10     | 0.56 | 1.10E-05 | 5.12E-05 | Over-expressed |
| ATP8B5P    | 0.56 | 3.15E-05 | 1.27E-04 | Over-expressed |
| LOC728613  | 0.56 | 6.77E-05 | 2.48E-04 | Over-expressed |
| EEF1A1P9   | 0.56 | 7.37E-05 | 2.68E-04 | Over-expressed |
| YBEY       | 0.56 | 7.63E-05 | 2.77E-04 | Over-expressed |
| TMSB4XP8   | 0.56 | 1.01E-04 | 3.54E-04 | Over-expressed |
| NUDT18     | 0.56 | 6.05E-04 | 1.68E-03 | Over-expressed |
| GNA15      | 0.56 | 8.17E-04 | 2.19E-03 | Over-expressed |
| RNASE6     | 0.56 | 1.98E-03 | 4.72E-03 | Over-expressed |
| GSDMB      | 0.56 | 2.78E-03 | 6.37E-03 | Over-expressed |
| RM12       | 0.56 | 3.54E-03 | 7.86E-03 | Over-expressed |
| MKI67      | 0.56 | 4.66E-03 | 0.01     | Over-expressed |
| GPRIN1     | 0.56 | 5.56E-03 | 0.0117   | Over-expressed |
| ACP5       | 0.56 | 9.73E-03 | 0.0191   | Over-expressed |
| CD3E       | 0.56 | 0.0188   | 0.0339   | Over-expressed |
| CREB5      | 0.56 | 0.0189   | 0.0341   | Over-expressed |
| NOP58      | 0.55 | 3.77E-10 | 7.52E-09 | Over-expressed |
| EXOSC7     | 0.55 | 6.57E-10 | 1.19E-08 | Over-expressed |
| RABGGTB    | 0.55 | 1.15E-09 | 1.93E-08 | Over-expressed |
| MRPL22     | 0.55 | 4.18E-09 | 5.82E-08 | Over-expressed |
| B4GALT2    | 0.55 | 4.52E-09 | 6.21E-08 | Over-expressed |
| ZNF446     | 0.55 | 5.47E-09 | 7.34E-08 | Over-expressed |
| THUMPD2    | 0.55 | 8.15E-09 | 1.03E-07 | Over-expressed |
| KDELRL1    | 0.55 | 9.23E-09 | 1.14E-07 | Over-expressed |
| PABPC4     | 0.55 | 1.36E-08 | 1.60E-07 | Over-expressed |
| ABHD12     | 0.55 | 3.37E-08 | 3.52E-07 | Over-expressed |
| CNOT11     | 0.55 | 4.20E-08 | 4.24E-07 | Over-expressed |
| FBXO22-AS1 | 0.55 | 5.22E-08 | 5.12E-07 | Over-expressed |
| DMAP1      | 0.55 | 8.50E-08 | 7.78E-07 | Over-expressed |
| R3HDM4     | 0.55 | 1.28E-07 | 1.11E-06 | Over-expressed |
| STK11IP    | 0.55 | 3.58E-07 | 2.65E-06 | Over-expressed |
| GET4       | 0.55 | 3.79E-07 | 2.77E-06 | Over-expressed |
| ADSL       | 0.55 | 4.32E-07 | 3.11E-06 | Over-expressed |
| RRP9       | 0.55 | 5.85E-07 | 4.04E-06 | Over-expressed |
| HMG1N1     | 0.55 | 7.99E-07 | 5.26E-06 | Over-expressed |
| NANS       | 0.55 | 8.64E-07 | 5.64E-06 | Over-expressed |
| IRF3       | 0.55 | 8.86E-07 | 5.75E-06 | Over-expressed |
| MAP2K2     | 0.55 | 1.08E-06 | 6.81E-06 | Over-expressed |
| C12ORF76   | 0.55 | 2.74E-06 | 1.51E-05 | Over-expressed |
| NDUFAF4    | 0.55 | 3.54E-06 | 1.89E-05 | Over-expressed |
| RPL36AL    | 0.55 | 5.54E-06 | 2.80E-05 | Over-expressed |
| OXLD1      | 0.55 | 8.87E-06 | 4.23E-05 | Over-expressed |
| NTMT1      | 0.55 | 1.47E-05 | 6.53E-05 | Over-expressed |
| AP2S1      | 0.55 | 1.61E-05 | 7.10E-05 | Over-expressed |
| PSMC1      | 0.55 | 1.99E-05 | 8.53E-05 | Over-expressed |
| MRPL12     | 0.55 | 2.76E-05 | 1.14E-04 | Over-expressed |
| AURKAIP1   | 0.55 | 5.99E-05 | 2.24E-04 | Over-expressed |
| BRI3       | 0.55 | 6.43E-05 | 2.38E-04 | Over-expressed |
| ALKBH7     | 0.55 | 3.16E-04 | 9.59E-04 | Over-expressed |
| NUTM2A     | 0.55 | 3.44E-04 | 1.03E-03 | Over-expressed |

|          |      |          |          |                |
|----------|------|----------|----------|----------------|
| PP7080   | 0.55 | 1.25E-03 | 3.16E-03 | Over-expressed |
| HES6     | 0.55 | 1.26E-03 | 3.19E-03 | Over-expressed |
| TMEM243  | 0.55 | 1.94E-03 | 4.64E-03 | Over-expressed |
| CERKL    | 0.55 | 2.78E-03 | 6.38E-03 | Over-expressed |
| NBDY     | 0.55 | 2.90E-03 | 6.61E-03 | Over-expressed |
| CCDC150  | 0.55 | 3.23E-03 | 7.26E-03 | Over-expressed |
| MMAB     | 0.55 | 3.33E-03 | 7.46E-03 | Over-expressed |
| CHMP4C   | 0.55 | 3.56E-03 | 7.89E-03 | Over-expressed |
| APOBEC3G | 0.55 | 5.97E-03 | 0.0124   | Over-expressed |
| MC1R     | 0.55 | 7.36E-03 | 0.0149   | Over-expressed |
| C1QB     | 0.55 | 0.0135   | 0.0255   | Over-expressed |
| ALOX5AP  | 0.55 | 0.014    | 0.0262   | Over-expressed |
| PDE4C    | 0.55 | 0.0203   | 0.0363   | Over-expressed |
| ZSWIM1   | 0.54 | 2.10E-10 | 4.55E-09 | Over-expressed |
| EIF2S3   | 0.54 | 2.73E-10 | 5.75E-09 | Over-expressed |
| RBX1     | 0.54 | 3.79E-09 | 5.35E-08 | Over-expressed |
| CHCHD2   | 0.54 | 1.58E-08 | 1.83E-07 | Over-expressed |
| ITGB1BP1 | 0.54 | 1.95E-08 | 2.19E-07 | Over-expressed |
| DNAJB2   | 0.54 | 2.26E-08 | 2.49E-07 | Over-expressed |
| PSMD13   | 0.54 | 2.54E-08 | 2.76E-07 | Over-expressed |
| SNRPD3   | 0.54 | 3.81E-08 | 3.92E-07 | Over-expressed |
| TUSC2    | 0.54 | 4.29E-08 | 4.32E-07 | Over-expressed |
| ORMDL2   | 0.54 | 5.09E-08 | 5.03E-07 | Over-expressed |
| IMMP1L   | 0.54 | 5.71E-08 | 5.49E-07 | Over-expressed |
| C15ORF61 | 0.54 | 9.26E-08 | 8.39E-07 | Over-expressed |
| ACTG1    | 0.54 | 2.27E-07 | 1.80E-06 | Over-expressed |
| EIF3L    | 0.54 | 2.72E-07 | 2.10E-06 | Over-expressed |
| QTRT1    | 0.54 | 1.31E-06 | 7.99E-06 | Over-expressed |
| COA6     | 0.54 | 3.12E-06 | 1.70E-05 | Over-expressed |
| COMMD4   | 0.54 | 5.32E-06 | 2.71E-05 | Over-expressed |
| TCF3     | 0.54 | 5.92E-06 | 2.98E-05 | Over-expressed |
| SLC35D2  | 0.54 | 6.47E-06 | 3.22E-05 | Over-expressed |
| CLTB     | 0.54 | 8.00E-06 | 3.86E-05 | Over-expressed |
| ZSWIM7   | 0.54 | 8.71E-06 | 4.17E-05 | Over-expressed |
| PSMB1    | 0.54 | 1.33E-05 | 6.00E-05 | Over-expressed |
| NUDT2    | 0.54 | 1.87E-05 | 8.07E-05 | Over-expressed |
| POLR2F   | 0.54 | 5.75E-05 | 2.16E-04 | Over-expressed |
| HCFC1R1  | 0.54 | 5.94E-05 | 2.22E-04 | Over-expressed |
| STAG3L4  | 0.54 | 9.97E-05 | 3.50E-04 | Over-expressed |
| GTF3A    | 0.54 | 1.06E-04 | 3.68E-04 | Over-expressed |
| TRAPPC6A | 0.54 | 3.86E-04 | 1.14E-03 | Over-expressed |
| DNAJC18  | 0.54 | 8.92E-04 | 2.36E-03 | Over-expressed |
| UBE2T    | 0.54 | 1.18E-03 | 2.99E-03 | Over-expressed |
| KIF11    | 0.54 | 2.47E-03 | 5.75E-03 | Over-expressed |
| SIGLEC10 | 0.54 | 8.33E-03 | 0.0167   | Over-expressed |
| NCAPH    | 0.54 | 0.0154   | 0.0285   | Over-expressed |
| LCK      | 0.54 | 0.0196   | 0.0352   | Over-expressed |
| EIF3M    | 0.53 | 7.16E-11 | 1.86E-09 | Over-expressed |
| C12ORF10 | 0.53 | 7.28E-11 | 1.89E-09 | Over-expressed |
| NIFK     | 0.53 | 3.70E-10 | 7.42E-09 | Over-expressed |
| HSBP1    | 0.53 | 4.68E-10 | 9.09E-09 | Over-expressed |
| SNRNP70  | 0.53 | 9.46E-10 | 1.63E-08 | Over-expressed |
| POLR2G   | 0.53 | 1.50E-09 | 2.40E-08 | Over-expressed |
| CCT5     | 0.53 | 1.12E-08 | 1.36E-07 | Over-expressed |
| DRAP1    | 0.53 | 1.87E-08 | 2.13E-07 | Over-expressed |
| KDM1A    | 0.53 | 2.52E-08 | 2.74E-07 | Over-expressed |
| KLHDC3   | 0.53 | 4.28E-08 | 4.31E-07 | Over-expressed |

|            |      |          |          |                |
|------------|------|----------|----------|----------------|
| NABP2      | 0.53 | 5.13E-08 | 5.05E-07 | Over-expressed |
| MBOAT7     | 0.53 | 7.32E-08 | 6.81E-07 | Over-expressed |
| MORC2-AS1  | 0.53 | 1.47E-07 | 1.26E-06 | Over-expressed |
| INTS8      | 0.53 | 3.70E-07 | 2.72E-06 | Over-expressed |
| TOMM5      | 0.53 | 5.17E-07 | 3.63E-06 | Over-expressed |
| DCUN1D5    | 0.53 | 5.31E-07 | 3.71E-06 | Over-expressed |
| TTC28-AS1  | 0.53 | 1.26E-06 | 7.75E-06 | Over-expressed |
| NARF       | 0.53 | 1.42E-06 | 8.59E-06 | Over-expressed |
| TRAF4      | 0.53 | 1.46E-06 | 8.78E-06 | Over-expressed |
| TUBA1B     | 0.53 | 2.19E-06 | 1.25E-05 | Over-expressed |
| NT5C3A     | 0.53 | 2.20E-06 | 1.25E-05 | Over-expressed |
| SUZ12P1    | 0.53 | 3.77E-06 | 2.01E-05 | Over-expressed |
| TSNARE1    | 0.53 | 6.78E-06 | 3.34E-05 | Over-expressed |
| RGS19      | 0.53 | 9.63E-06 | 4.55E-05 | Over-expressed |
| TBX19      | 0.53 | 1.70E-05 | 7.44E-05 | Over-expressed |
| C20ORF96   | 0.53 | 2.28E-05 | 9.60E-05 | Over-expressed |
| TWF2       | 0.53 | 3.67E-05 | 1.46E-04 | Over-expressed |
| POLD1      | 0.53 | 5.88E-05 | 2.20E-04 | Over-expressed |
| NSUN5P2    | 0.53 | 6.71E-05 | 2.46E-04 | Over-expressed |
| MRPL28     | 0.53 | 9.39E-05 | 3.32E-04 | Over-expressed |
| CHMP2A     | 0.53 | 1.18E-04 | 4.05E-04 | Over-expressed |
| FANCE      | 0.53 | 1.95E-04 | 6.31E-04 | Over-expressed |
| LOC374443  | 0.53 | 2.62E-04 | 8.12E-04 | Over-expressed |
| PHC1       | 0.53 | 3.99E-04 | 1.17E-03 | Over-expressed |
| FGFBP3     | 0.53 | 5.17E-04 | 1.47E-03 | Over-expressed |
| IL18BP     | 0.53 | 5.58E-04 | 1.57E-03 | Over-expressed |
| FAM50A     | 0.53 | 8.28E-04 | 2.21E-03 | Over-expressed |
| DLGAP1-AS1 | 0.53 | 1.33E-03 | 3.34E-03 | Over-expressed |
| DENND2D    | 0.53 | 1.41E-03 | 3.51E-03 | Over-expressed |
| LINC00926  | 0.53 | 2.26E-03 | 5.32E-03 | Over-expressed |
| RRM2       | 0.53 | 3.53E-03 | 7.84E-03 | Over-expressed |
| BFSP1      | 0.53 | 5.13E-03 | 0.0109   | Over-expressed |
| PARVB      | 0.53 | 6.78E-03 | 0.0139   | Over-expressed |
| NDC80      | 0.53 | 0.0111   | 0.0214   | Over-expressed |
| BCAT1      | 0.53 | 0.0183   | 0.0331   | Over-expressed |
| USP27X     | 0.53 | 0.0194   | 0.0349   | Over-expressed |
| HLA-DMA    | 0.53 | 0.0221   | 0.0391   | Over-expressed |
| GPBAR1     | 0.53 | 0.0222   | 0.0394   | Over-expressed |
| GTSE1      | 0.53 | 0.029    | 0.0499   | Over-expressed |
| MRPL43     | 0.52 | 7.84E-15 | 6.70E-13 | Over-expressed |
| COPZ1      | 0.52 | 2.06E-12 | 8.76E-11 | Over-expressed |
| ILKAP      | 0.52 | 8.83E-11 | 2.21E-09 | Over-expressed |
| JAGN1      | 0.52 | 4.09E-09 | 5.73E-08 | Over-expressed |
| SREK1IP1   | 0.52 | 1.66E-08 | 1.90E-07 | Over-expressed |
| DDX56      | 0.52 | 4.32E-08 | 4.33E-07 | Over-expressed |
| ZNF622     | 0.52 | 2.17E-07 | 1.73E-06 | Over-expressed |
| DERL2      | 0.52 | 2.40E-07 | 1.88E-06 | Over-expressed |
| BLOC1S4    | 0.52 | 2.57E-07 | 1.99E-06 | Over-expressed |
| RCE1       | 0.52 | 2.85E-07 | 2.18E-06 | Over-expressed |
| MYDGF      | 0.52 | 7.80E-07 | 5.17E-06 | Over-expressed |
| GEMIN6     | 0.52 | 1.32E-06 | 8.06E-06 | Over-expressed |
| CCDC73     | 0.52 | 1.60E-06 | 9.52E-06 | Over-expressed |
| MED22      | 0.52 | 1.97E-06 | 1.14E-05 | Over-expressed |
| SDHAP3     | 0.52 | 2.39E-06 | 1.35E-05 | Over-expressed |
| CUTA       | 0.52 | 4.72E-06 | 2.44E-05 | Over-expressed |
| LENG1      | 0.52 | 5.28E-06 | 2.69E-05 | Over-expressed |
| ATP6V0B    | 0.52 | 2.37E-05 | 9.94E-05 | Over-expressed |

|           |      |          |          |                |
|-----------|------|----------|----------|----------------|
| ARRB2     | 0.52 | 2.41E-05 | 1.01E-04 | Over-expressed |
| COX14     | 0.52 | 4.98E-05 | 1.90E-04 | Over-expressed |
| RAB32     | 0.52 | 6.71E-05 | 2.46E-04 | Over-expressed |
| HDAC7     | 0.52 | 1.07E-04 | 3.70E-04 | Over-expressed |
| CLEC4A    | 0.52 | 1.34E-04 | 4.54E-04 | Over-expressed |
| CD151     | 0.52 | 1.35E-04 | 4.57E-04 | Over-expressed |
| NSMCE1    | 0.52 | 1.44E-04 | 4.81E-04 | Over-expressed |
| RPL23AP7  | 0.52 | 1.61E-04 | 5.31E-04 | Over-expressed |
| RNASEH2A  | 0.52 | 1.61E-04 | 5.32E-04 | Over-expressed |
| CDC25B    | 0.52 | 1.69E-04 | 5.55E-04 | Over-expressed |
| TRIB3     | 0.52 | 4.36E-04 | 1.27E-03 | Over-expressed |
| MRPL54    | 0.52 | 6.14E-04 | 1.70E-03 | Over-expressed |
| ADAM8     | 0.52 | 6.29E-04 | 1.73E-03 | Over-expressed |
| ZNHIT1    | 0.52 | 6.64E-04 | 1.83E-03 | Over-expressed |
| CD79B     | 0.52 | 1.02E-03 | 2.65E-03 | Over-expressed |
| LAPTM5    | 0.52 | 1.17E-03 | 2.97E-03 | Over-expressed |
| DUSP23    | 0.52 | 1.54E-03 | 3.79E-03 | Over-expressed |
| NFE2L3P2  | 0.52 | 3.07E-03 | 6.94E-03 | Over-expressed |
| EIF4EBP3  | 0.52 | 3.39E-03 | 7.58E-03 | Over-expressed |
| SH2B2     | 0.52 | 4.07E-03 | 8.88E-03 | Over-expressed |
| CORO1A    | 0.52 | 6.54E-03 | 0.0134   | Over-expressed |
| SYTL3     | 0.52 | 6.99E-03 | 0.0143   | Over-expressed |
| ASF1B     | 0.52 | 7.51E-03 | 0.0152   | Over-expressed |
| TMEM99    | 0.52 | 7.58E-03 | 0.0153   | Over-expressed |
| TPM3P9    | 0.52 | 8.54E-03 | 0.017    | Over-expressed |
| KIF18B    | 0.52 | 0.0228   | 0.0403   | Over-expressed |
| SMAD5-AS1 | 0.52 | 0.0245   | 0.043    | Over-expressed |
| DAZAP1    | 0.51 | 3.07E-14 | 2.31E-12 | Over-expressed |
| METTL5    | 0.51 | 4.24E-11 | 1.20E-09 | Over-expressed |
| MCRS1     | 0.51 | 8.66E-11 | 2.19E-09 | Over-expressed |
| DDX27     | 0.51 | 2.91E-10 | 6.01E-09 | Over-expressed |
| ANKZF1    | 0.51 | 1.55E-09 | 2.47E-08 | Over-expressed |
| SURF6     | 0.51 | 2.17E-09 | 3.31E-08 | Over-expressed |
| BOD1      | 0.51 | 2.28E-09 | 3.47E-08 | Over-expressed |
| TOMM22    | 0.51 | 3.49E-09 | 5.00E-08 | Over-expressed |
| TBRG4     | 0.51 | 5.60E-09 | 7.47E-08 | Over-expressed |
| NDUFAF5   | 0.51 | 9.04E-09 | 1.12E-07 | Over-expressed |
| PDCD11    | 0.51 | 3.80E-08 | 3.92E-07 | Over-expressed |
| ENTPD6    | 0.51 | 4.36E-08 | 4.37E-07 | Over-expressed |
| GPANK1    | 0.51 | 8.23E-08 | 7.56E-07 | Over-expressed |
| PPA1      | 0.51 | 8.38E-08 | 7.68E-07 | Over-expressed |
| KAT2A     | 0.51 | 4.38E-07 | 3.15E-06 | Over-expressed |
| FLOT2     | 0.51 | 4.65E-07 | 3.31E-06 | Over-expressed |
| NOC4L     | 0.51 | 7.66E-07 | 5.08E-06 | Over-expressed |
| CAPNS1    | 0.51 | 8.63E-07 | 5.63E-06 | Over-expressed |
| LYPLA2    | 0.51 | 1.08E-06 | 6.81E-06 | Over-expressed |
| DUSP22    | 0.51 | 1.27E-06 | 7.80E-06 | Over-expressed |
| HSPE1     | 0.51 | 1.39E-06 | 8.45E-06 | Over-expressed |
| COPRS     | 0.51 | 2.08E-06 | 1.19E-05 | Over-expressed |
| LRRC14    | 0.51 | 2.90E-06 | 1.59E-05 | Over-expressed |
| BRD3OS    | 0.51 | 2.91E-06 | 1.60E-05 | Over-expressed |
| TUBB      | 0.51 | 2.99E-06 | 1.64E-05 | Over-expressed |
| SNHG20    | 0.51 | 3.05E-06 | 1.67E-05 | Over-expressed |
| MRPS25    | 0.51 | 4.11E-06 | 2.17E-05 | Over-expressed |
| CIAO2B    | 0.51 | 2.25E-05 | 9.50E-05 | Over-expressed |
| TIMM10    | 0.51 | 1.65E-04 | 5.42E-04 | Over-expressed |
| EID2B     | 0.51 | 3.86E-04 | 1.14E-03 | Over-expressed |

|          |      |          |          |                |
|----------|------|----------|----------|----------------|
| AACS     | 0.51 | 5.46E-04 | 1.54E-03 | Over-expressed |
| C12ORF49 | 0.51 | 5.58E-04 | 1.57E-03 | Over-expressed |
| FAM117B  | 0.51 | 1.49E-03 | 3.68E-03 | Over-expressed |
| LSP1     | 0.51 | 1.76E-03 | 4.25E-03 | Over-expressed |
| TP53TG1  | 0.51 | 2.35E-03 | 5.51E-03 | Over-expressed |
| CATSPER2 | 0.51 | 2.82E-03 | 6.46E-03 | Over-expressed |
| DSC2     | 0.51 | 5.06E-03 | 0.0107   | Over-expressed |
| KCTD15   | 0.51 | 0.0244   | 0.0429   | Over-expressed |
| RSL1D1   | 0.5  | 3.88E-12 | 1.49E-10 | Over-expressed |
| MRPS16   | 0.5  | 7.34E-10 | 1.31E-08 | Over-expressed |
| RBM4     | 0.5  | 3.58E-09 | 5.11E-08 | Over-expressed |
| UBE2I    | 0.5  | 5.51E-09 | 7.39E-08 | Over-expressed |
| FARSB    | 0.5  | 5.57E-09 | 7.44E-08 | Over-expressed |
| EIF1     | 0.5  | 9.38E-09 | 1.16E-07 | Over-expressed |
| DEDD2    | 0.5  | 1.06E-08 | 1.29E-07 | Over-expressed |
| LSM3     | 0.5  | 3.28E-08 | 3.45E-07 | Over-expressed |
| TSEN34   | 0.5  | 3.87E-08 | 3.98E-07 | Over-expressed |
| CSE1L    | 0.5  | 6.14E-08 | 5.85E-07 | Over-expressed |
| ATP5MG   | 0.5  | 6.78E-08 | 6.38E-07 | Over-expressed |
| IFT20    | 0.5  | 1.23E-07 | 1.07E-06 | Over-expressed |
| NSA2     | 0.5  | 1.25E-07 | 1.08E-06 | Over-expressed |
| UBOX5    | 0.5  | 1.64E-07 | 1.38E-06 | Over-expressed |
| MAGOHB   | 0.5  | 1.68E-07 | 1.40E-06 | Over-expressed |
| TP53RK   | 0.5  | 9.06E-07 | 5.86E-06 | Over-expressed |
| TRMT61A  | 0.5  | 9.52E-07 | 6.11E-06 | Over-expressed |
| PHB      | 0.5  | 9.70E-07 | 6.22E-06 | Over-expressed |
| SRRD     | 0.5  | 1.15E-06 | 7.16E-06 | Over-expressed |
| TFAP4    | 0.5  | 1.82E-06 | 1.06E-05 | Over-expressed |
| JMJD4    | 0.5  | 2.50E-06 | 1.40E-05 | Over-expressed |
| PRMT2    | 0.5  | 3.16E-06 | 1.71E-05 | Over-expressed |
| ZNF787   | 0.5  | 3.52E-06 | 1.89E-05 | Over-expressed |
| ACD      | 0.5  | 3.77E-06 | 2.01E-05 | Over-expressed |
| DYRK4    | 0.5  | 5.45E-06 | 2.76E-05 | Over-expressed |
| G6PC3    | 0.5  | 9.67E-06 | 4.56E-05 | Over-expressed |
| DDRGK1   | 0.5  | 1.22E-05 | 5.60E-05 | Over-expressed |
| DAPK3    | 0.5  | 1.50E-05 | 6.64E-05 | Over-expressed |
| PUDP     | 0.5  | 1.75E-05 | 7.64E-05 | Over-expressed |
| MRM3     | 0.5  | 3.68E-05 | 1.46E-04 | Over-expressed |
| ACOT8    | 0.5  | 4.37E-05 | 1.70E-04 | Over-expressed |
| CCDC124  | 0.5  | 8.33E-05 | 2.99E-04 | Over-expressed |
| PRR5     | 0.5  | 1.95E-04 | 6.31E-04 | Over-expressed |
| NUDCD1   | 0.5  | 2.39E-04 | 7.48E-04 | Over-expressed |
| BBC3     | 0.5  | 2.60E-04 | 8.05E-04 | Over-expressed |
| ADCK5    | 0.5  | 3.24E-04 | 9.79E-04 | Over-expressed |
| FIS1     | 0.5  | 4.80E-04 | 1.37E-03 | Over-expressed |
| ATP5MC1  | 0.5  | 4.98E-04 | 1.42E-03 | Over-expressed |
| MICOS13  | 0.5  | 5.53E-04 | 1.55E-03 | Over-expressed |
| GPSM3    | 0.5  | 5.77E-04 | 1.61E-03 | Over-expressed |
| BLOC1S1  | 0.5  | 5.83E-04 | 1.62E-03 | Over-expressed |
| SRRM5    | 0.5  | 7.16E-04 | 1.95E-03 | Over-expressed |
| PIGL     | 0.5  | 8.46E-04 | 2.25E-03 | Over-expressed |
| ENKD1    | 0.5  | 8.76E-04 | 2.32E-03 | Over-expressed |
| ARRB1    | 0.5  | 1.81E-03 | 4.37E-03 | Over-expressed |
| DRAM1    | 0.5  | 2.39E-03 | 5.57E-03 | Over-expressed |
| RIBC1    | 0.5  | 2.41E-03 | 5.63E-03 | Over-expressed |
| TBXAS1   | 0.5  | 3.03E-03 | 6.88E-03 | Over-expressed |
| P4HA1    | 0.5  | 3.42E-03 | 7.63E-03 | Over-expressed |

|            |      |          |          |                |
|------------|------|----------|----------|----------------|
| TNFRSF12A  | 0.5  | 5.00E-03 | 0.0106   | Over-expressed |
| MSX1       | 0.5  | 6.71E-03 | 0.0138   | Over-expressed |
| GPR160     | 0.5  | 6.85E-03 | 0.014    | Over-expressed |
| ZNF69      | 0.5  | 9.23E-03 | 0.0182   | Over-expressed |
| IGFBP3     | 0.5  | 9.93E-03 | 0.0194   | Over-expressed |
| LFNG       | 0.5  | 0.0137   | 0.0257   | Over-expressed |
| CD48       | 0.5  | 0.0148   | 0.0275   | Over-expressed |
| RRP36      | 0.49 | 8.86E-10 | 1.54E-08 | Over-expressed |
| AIMP1      | 0.49 | 2.45E-09 | 3.67E-08 | Over-expressed |
| POLR1D     | 0.49 | 3.06E-09 | 4.46E-08 | Over-expressed |
| RRP8       | 0.49 | 4.19E-09 | 5.83E-08 | Over-expressed |
| CFL1       | 0.49 | 1.01E-08 | 1.24E-07 | Over-expressed |
| POLR3C     | 0.49 | 1.34E-08 | 1.59E-07 | Over-expressed |
| TMEM223    | 0.49 | 1.41E-08 | 1.66E-07 | Over-expressed |
| CAPN10     | 0.49 | 4.09E-08 | 4.17E-07 | Over-expressed |
| CYTH2      | 0.49 | 5.13E-08 | 5.05E-07 | Over-expressed |
| UCKL1      | 0.49 | 5.63E-08 | 5.43E-07 | Over-expressed |
| H3F3A      | 0.49 | 7.22E-08 | 6.74E-07 | Over-expressed |
| U2AF1      | 0.49 | 1.29E-07 | 1.12E-06 | Over-expressed |
| BRIX1      | 0.49 | 1.62E-07 | 1.36E-06 | Over-expressed |
| NDUFS3     | 0.49 | 2.25E-07 | 1.79E-06 | Over-expressed |
| PPRC1      | 0.49 | 3.63E-07 | 2.68E-06 | Over-expressed |
| EIF4B      | 0.49 | 5.65E-07 | 3.92E-06 | Over-expressed |
| ZNF821     | 0.49 | 7.04E-07 | 4.74E-06 | Over-expressed |
| CNTROB     | 0.49 | 7.61E-07 | 5.06E-06 | Over-expressed |
| LUC7L      | 0.49 | 8.27E-07 | 5.42E-06 | Over-expressed |
| ZNF706     | 0.49 | 9.40E-07 | 6.05E-06 | Over-expressed |
| POP5       | 0.49 | 1.06E-06 | 6.71E-06 | Over-expressed |
| ZMYND19    | 0.49 | 1.13E-06 | 7.06E-06 | Over-expressed |
| CD2BP2     | 0.49 | 1.23E-06 | 7.59E-06 | Over-expressed |
| TBCA       | 0.49 | 1.92E-06 | 1.11E-05 | Over-expressed |
| HAUS8      | 0.49 | 2.79E-06 | 1.54E-05 | Over-expressed |
| DNAJC9     | 0.49 | 4.24E-06 | 2.23E-05 | Over-expressed |
| SERTAD3    | 0.49 | 5.90E-06 | 2.97E-05 | Over-expressed |
| PPP2R3B    | 0.49 | 9.71E-06 | 4.58E-05 | Over-expressed |
| MBD3       | 0.49 | 1.15E-05 | 5.31E-05 | Over-expressed |
| MRPL20     | 0.49 | 1.52E-05 | 6.74E-05 | Over-expressed |
| ZNF696     | 0.49 | 2.65E-05 | 1.10E-04 | Over-expressed |
| LSM5       | 0.49 | 3.03E-05 | 1.23E-04 | Over-expressed |
| IFNGR2     | 0.49 | 3.48E-05 | 1.40E-04 | Over-expressed |
| KIAA1522   | 0.49 | 5.41E-05 | 2.05E-04 | Over-expressed |
| CSTB       | 0.49 | 9.54E-05 | 3.36E-04 | Over-expressed |
| PDF        | 0.49 | 9.82E-05 | 3.45E-04 | Over-expressed |
| TPT1-AS1   | 0.49 | 1.02E-04 | 3.55E-04 | Over-expressed |
| LIN37      | 0.49 | 1.07E-04 | 3.72E-04 | Over-expressed |
| DICER1-AS1 | 0.49 | 1.46E-04 | 4.87E-04 | Over-expressed |
| MICOS10    | 0.49 | 1.52E-04 | 5.06E-04 | Over-expressed |
| PRKCD      | 0.49 | 2.09E-04 | 6.67E-04 | Over-expressed |
| ZNF789     | 0.49 | 3.52E-04 | 1.05E-03 | Over-expressed |
| NDUFB10    | 0.49 | 5.66E-04 | 1.59E-03 | Over-expressed |
| C1ORF122   | 0.49 | 8.79E-04 | 2.33E-03 | Over-expressed |
| ALDH3B1    | 0.49 | 2.49E-03 | 5.78E-03 | Over-expressed |
| SEPTIN1    | 0.49 | 3.07E-03 | 6.94E-03 | Over-expressed |
| CCNF       | 0.49 | 3.07E-03 | 6.94E-03 | Over-expressed |
| TUBB1      | 0.49 | 3.55E-03 | 7.88E-03 | Over-expressed |
| CD86       | 0.49 | 3.61E-03 | 7.98E-03 | Over-expressed |
| PNMA1      | 0.49 | 4.90E-03 | 0.0105   | Over-expressed |



|           |      |          |          |                |
|-----------|------|----------|----------|----------------|
| MORN4     | 0.49 | 5.60E-03 | 0.0117   | Over-expressed |
| LIN7B     | 0.49 | 6.27E-03 | 0.013    | Over-expressed |
| LOC155060 | 0.49 | 6.65E-03 | 0.0136   | Over-expressed |
| HSD11B2   | 0.49 | 7.61E-03 | 0.0154   | Over-expressed |
| LINC02591 | 0.49 | 0.0105   | 0.0204   | Over-expressed |
| N4BP3     | 0.49 | 0.0124   | 0.0235   | Over-expressed |
| ZNF496    | 0.49 | 0.0133   | 0.025    | Over-expressed |
| HOXB5     | 0.49 | 0.014    | 0.0262   | Over-expressed |
| PSMB9     | 0.49 | 0.0184   | 0.0333   | Over-expressed |
| GIN51     | 0.49 | 0.021    | 0.0374   | Over-expressed |
| KIF4A     | 0.49 | 0.0221   | 0.0391   | Over-expressed |
| METRNL    | 0.49 | 0.0229   | 0.0405   | Over-expressed |
| RSL24D1   | 0.48 | 2.30E-13 | 1.37E-11 | Over-expressed |
| ANP32A    | 0.48 | 2.78E-10 | 5.82E-09 | Over-expressed |
| ZDHHC16   | 0.48 | 4.88E-10 | 9.38E-09 | Over-expressed |
| ATG4B     | 0.48 | 4.97E-10 | 9.51E-09 | Over-expressed |
| WDR70     | 0.48 | 1.38E-09 | 2.25E-08 | Over-expressed |
| MOB2      | 0.48 | 4.34E-09 | 6.01E-08 | Over-expressed |
| MRPS5     | 0.48 | 1.41E-07 | 1.21E-06 | Over-expressed |
| B4GALT7   | 0.48 | 1.46E-07 | 1.25E-06 | Over-expressed |
| DYNLT1    | 0.48 | 1.92E-07 | 1.56E-06 | Over-expressed |
| SCO2      | 0.48 | 5.62E-07 | 3.90E-06 | Over-expressed |
| ARPC5L    | 0.48 | 6.63E-07 | 4.52E-06 | Over-expressed |
| BOLA3     | 0.48 | 2.00E-06 | 1.15E-05 | Over-expressed |
| AIP       | 0.48 | 2.30E-06 | 1.30E-05 | Over-expressed |
| ANKRD39   | 0.48 | 4.81E-06 | 2.48E-05 | Over-expressed |
| CCHCR1    | 0.48 | 7.77E-06 | 3.77E-05 | Over-expressed |
| BCAP31    | 0.48 | 7.88E-06 | 3.81E-05 | Over-expressed |
| HINT1     | 0.48 | 8.71E-06 | 4.17E-05 | Over-expressed |
| DVL2      | 0.48 | 1.46E-05 | 6.51E-05 | Over-expressed |
| SMS       | 0.48 | 1.76E-05 | 7.65E-05 | Over-expressed |
| COX5A     | 0.48 | 3.07E-05 | 1.25E-04 | Over-expressed |
| ZCCHC3    | 0.48 | 3.30E-05 | 1.33E-04 | Over-expressed |
| C1ORF50   | 0.48 | 4.81E-05 | 1.84E-04 | Over-expressed |
| PSMB7     | 0.48 | 5.38E-05 | 2.04E-04 | Over-expressed |
| TSR3      | 0.48 | 5.91E-05 | 2.21E-04 | Over-expressed |
| GPX4      | 0.48 | 7.13E-05 | 2.60E-04 | Over-expressed |
| SCRIB     | 0.48 | 7.15E-05 | 2.61E-04 | Over-expressed |
| FANCG     | 0.48 | 1.46E-04 | 4.88E-04 | Over-expressed |
| CCDC61    | 0.48 | 1.53E-04 | 5.06E-04 | Over-expressed |
| BSG       | 0.48 | 2.04E-04 | 6.54E-04 | Over-expressed |
| TTC21A    | 0.48 | 5.47E-04 | 1.54E-03 | Over-expressed |
| MICA      | 0.48 | 5.68E-04 | 1.59E-03 | Over-expressed |
| TSTA3     | 0.48 | 5.94E-04 | 1.65E-03 | Over-expressed |
| ADA       | 0.48 | 7.02E-04 | 1.92E-03 | Over-expressed |
| DTD1      | 0.48 | 9.89E-04 | 2.58E-03 | Over-expressed |
| ACYP1     | 0.48 | 1.10E-03 | 2.82E-03 | Over-expressed |
| KMT2E-AS1 | 0.48 | 1.19E-03 | 3.02E-03 | Over-expressed |
| MANF      | 0.48 | 1.36E-03 | 3.41E-03 | Over-expressed |
| ANKDD1A   | 0.48 | 1.48E-03 | 3.66E-03 | Over-expressed |
| NDUFB1    | 0.48 | 1.53E-03 | 3.77E-03 | Over-expressed |
| DPM3      | 0.48 | 5.21E-03 | 0.011    | Over-expressed |
| UFSP1     | 0.48 | 6.63E-03 | 0.0136   | Over-expressed |
| TK1       | 0.48 | 6.79E-03 | 0.0139   | Over-expressed |
| OTOA      | 0.48 | 0.0124   | 0.0235   | Over-expressed |
| DRC3      | 0.48 | 0.0149   | 0.0277   | Over-expressed |
| MIR600HG  | 0.48 | 0.0149   | 0.0277   | Over-expressed |

|           |      |          |          |                |
|-----------|------|----------|----------|----------------|
| TYMS      | 0.48 | 0.015    | 0.0279   | Over-expressed |
| CCL4      | 0.48 | 0.0269   | 0.0466   | Over-expressed |
| CCDC59    | 0.47 | 6.61E-11 | 1.73E-09 | Over-expressed |
| RPP30     | 0.47 | 1.17E-10 | 2.81E-09 | Over-expressed |
| C14ORF93  | 0.47 | 3.44E-09 | 4.95E-08 | Over-expressed |
| TPRKB     | 0.47 | 3.59E-09 | 5.12E-08 | Over-expressed |
| MED7      | 0.47 | 4.42E-09 | 6.11E-08 | Over-expressed |
| OLA1      | 0.47 | 2.24E-08 | 2.48E-07 | Over-expressed |
| MAVS      | 0.47 | 1.39E-07 | 1.20E-06 | Over-expressed |
| RAC1      | 0.47 | 1.41E-07 | 1.21E-06 | Over-expressed |
| CUTC      | 0.47 | 1.57E-07 | 1.33E-06 | Over-expressed |
| HIKESHI   | 0.47 | 2.12E-07 | 1.70E-06 | Over-expressed |
| TBC1D22A  | 0.47 | 2.83E-07 | 2.17E-06 | Over-expressed |
| ZNF7      | 0.47 | 2.99E-07 | 2.27E-06 | Over-expressed |
| FUNDC2    | 0.47 | 3.12E-07 | 2.36E-06 | Over-expressed |
| ZNF16     | 0.47 | 5.82E-07 | 4.03E-06 | Over-expressed |
| IMP4      | 0.47 | 8.84E-07 | 5.75E-06 | Over-expressed |
| TBC1D7    | 0.47 | 1.24E-06 | 7.66E-06 | Over-expressed |
| SYNGR2    | 0.47 | 1.28E-06 | 7.85E-06 | Over-expressed |
| DRG2      | 0.47 | 1.59E-06 | 9.47E-06 | Over-expressed |
| DHX34     | 0.47 | 1.67E-06 | 9.89E-06 | Over-expressed |
| STOML2    | 0.47 | 2.30E-06 | 1.30E-05 | Over-expressed |
| ATG101    | 0.47 | 2.30E-06 | 1.30E-05 | Over-expressed |
| RWDD1     | 0.47 | 2.39E-06 | 1.35E-05 | Over-expressed |
| DEAF1     | 0.47 | 3.71E-06 | 1.98E-05 | Over-expressed |
| PMF1      | 0.47 | 4.41E-06 | 2.31E-05 | Over-expressed |
| NCAPH2    | 0.47 | 1.13E-05 | 5.25E-05 | Over-expressed |
| B3GAT3    | 0.47 | 1.27E-05 | 5.79E-05 | Over-expressed |
| RAB5IF    | 0.47 | 2.86E-05 | 1.17E-04 | Over-expressed |
| ATP5PO    | 0.47 | 3.88E-05 | 1.53E-04 | Over-expressed |
| ALDH18A1  | 0.47 | 3.95E-05 | 1.56E-04 | Over-expressed |
| DNAJC17   | 0.47 | 4.34E-05 | 1.69E-04 | Over-expressed |
| PRAF2     | 0.47 | 5.43E-05 | 2.05E-04 | Over-expressed |
| MRPS15    | 0.47 | 7.33E-05 | 2.67E-04 | Over-expressed |
| ZNF589    | 0.47 | 8.36E-05 | 3.00E-04 | Over-expressed |
| RPL23AP82 | 0.47 | 1.21E-04 | 4.13E-04 | Over-expressed |
| GLA       | 0.47 | 1.88E-04 | 6.10E-04 | Over-expressed |
| C12ORF45  | 0.47 | 2.09E-04 | 6.68E-04 | Over-expressed |
| COX7A2    | 0.47 | 2.49E-04 | 7.78E-04 | Over-expressed |
| SNHG10    | 0.47 | 3.20E-04 | 9.68E-04 | Over-expressed |
| PMM1      | 0.47 | 4.39E-04 | 1.27E-03 | Over-expressed |
| ZNF385A   | 0.47 | 5.29E-04 | 1.50E-03 | Over-expressed |
| LINC00623 | 0.47 | 5.30E-04 | 1.50E-03 | Over-expressed |
| WDR13     | 0.47 | 1.04E-03 | 2.69E-03 | Over-expressed |
| ZNF547    | 0.47 | 1.08E-03 | 2.79E-03 | Over-expressed |
| TTLL3     | 0.47 | 1.22E-03 | 3.08E-03 | Over-expressed |
| IFI35     | 0.47 | 2.97E-03 | 6.75E-03 | Over-expressed |
| LRRRC75B  | 0.47 | 3.08E-03 | 6.96E-03 | Over-expressed |
| VMO1      | 0.47 | 4.14E-03 | 9.01E-03 | Over-expressed |
| GSTO1     | 0.47 | 4.42E-03 | 9.56E-03 | Over-expressed |
| PIK3CD    | 0.47 | 6.58E-03 | 0.0135   | Over-expressed |
| TMCC2     | 0.47 | 0.0209   | 0.0374   | Over-expressed |
| GPR132    | 0.47 | 0.0213   | 0.0379   | Over-expressed |
| B3GALT4   | 0.47 | 0.0233   | 0.0411   | Over-expressed |
| MEST      | 0.47 | 0.0246   | 0.0431   | Over-expressed |
| SAP30BP   | 0.46 | 2.81E-10 | 5.86E-09 | Over-expressed |
| SYS1      | 0.46 | 1.39E-09 | 2.25E-08 | Over-expressed |

|             |      |          |          |                |
|-------------|------|----------|----------|----------------|
| MEA1        | 0.46 | 6.76E-09 | 8.80E-08 | Over-expressed |
| GTF2F2      | 0.46 | 9.18E-09 | 1.14E-07 | Over-expressed |
| RAE1        | 0.46 | 1.52E-08 | 1.76E-07 | Over-expressed |
| GRK6        | 0.46 | 5.37E-08 | 5.25E-07 | Over-expressed |
| RHOG        | 0.46 | 6.50E-08 | 6.14E-07 | Over-expressed |
| RBMX2       | 0.46 | 7.64E-08 | 7.08E-07 | Over-expressed |
| THADA       | 0.46 | 9.91E-08 | 8.87E-07 | Over-expressed |
| PDCL3       | 0.46 | 1.01E-07 | 9.06E-07 | Over-expressed |
| TMED9       | 0.46 | 1.06E-07 | 9.40E-07 | Over-expressed |
| DGKZ        | 0.46 | 1.30E-07 | 1.13E-06 | Over-expressed |
| GATD1       | 0.46 | 2.87E-07 | 2.20E-06 | Over-expressed |
| DDX51       | 0.46 | 6.84E-07 | 4.63E-06 | Over-expressed |
| PDCD2       | 0.46 | 8.24E-07 | 5.41E-06 | Over-expressed |
| GPATCH3     | 0.46 | 1.81E-06 | 1.06E-05 | Over-expressed |
| C6ORF136    | 0.46 | 2.20E-06 | 1.25E-05 | Over-expressed |
| CLNS1A      | 0.46 | 2.22E-06 | 1.26E-05 | Over-expressed |
| FBXW4       | 0.46 | 2.62E-06 | 1.46E-05 | Over-expressed |
| RPL26L1     | 0.46 | 4.25E-06 | 2.24E-05 | Over-expressed |
| ZNF337      | 0.46 | 4.90E-06 | 2.52E-05 | Over-expressed |
| TMEM189     | 0.46 | 5.57E-06 | 2.81E-05 | Over-expressed |
| MPV17       | 0.46 | 5.60E-06 | 2.83E-05 | Over-expressed |
| NOP2        | 0.46 | 6.64E-06 | 3.29E-05 | Over-expressed |
| CNPY3       | 0.46 | 9.66E-06 | 4.56E-05 | Over-expressed |
| RILPL1      | 0.46 | 1.67E-05 | 7.33E-05 | Over-expressed |
| MRPL38      | 0.46 | 1.89E-05 | 8.15E-05 | Over-expressed |
| THUMPD3-AS1 | 0.46 | 2.06E-05 | 8.81E-05 | Over-expressed |
| CDC34       | 0.46 | 2.43E-05 | 1.02E-04 | Over-expressed |
| PLIN3       | 0.46 | 3.01E-05 | 1.23E-04 | Over-expressed |
| SLC29A3     | 0.46 | 3.91E-05 | 1.54E-04 | Over-expressed |
| COPE        | 0.46 | 5.27E-05 | 2.00E-04 | Over-expressed |
| STK17A      | 0.46 | 6.63E-05 | 2.44E-04 | Over-expressed |
| NUDC        | 0.46 | 1.14E-04 | 3.95E-04 | Over-expressed |
| UNC119      | 0.46 | 1.84E-04 | 6.00E-04 | Over-expressed |
| NDUFA7      | 0.46 | 5.92E-04 | 1.64E-03 | Over-expressed |
| ZNF814      | 0.46 | 6.63E-04 | 1.82E-03 | Over-expressed |
| SPATA2L     | 0.46 | 7.00E-04 | 1.91E-03 | Over-expressed |
| POC1A       | 0.46 | 9.75E-04 | 2.54E-03 | Over-expressed |
| BIN1        | 0.46 | 1.22E-03 | 3.08E-03 | Over-expressed |
| TLE3        | 0.46 | 1.23E-03 | 3.12E-03 | Over-expressed |
| PHF19       | 0.46 | 1.66E-03 | 4.05E-03 | Over-expressed |
| MSH5        | 0.46 | 2.04E-03 | 4.85E-03 | Over-expressed |
| TRAF5       | 0.46 | 2.06E-03 | 4.89E-03 | Over-expressed |
| DNAH14      | 0.46 | 2.26E-03 | 5.31E-03 | Over-expressed |
| UBE3D       | 0.46 | 2.80E-03 | 6.42E-03 | Over-expressed |
| ZNF530      | 0.46 | 3.03E-03 | 6.87E-03 | Over-expressed |
| GINS2       | 0.46 | 3.19E-03 | 7.19E-03 | Over-expressed |
| JOSD2       | 0.46 | 3.27E-03 | 7.34E-03 | Over-expressed |
| AURKA       | 0.46 | 3.57E-03 | 7.90E-03 | Over-expressed |
| GUCA1B      | 0.46 | 6.13E-03 | 0.0127   | Over-expressed |
| STX3        | 0.46 | 6.19E-03 | 0.0128   | Over-expressed |
| MPST        | 0.46 | 7.19E-03 | 0.0146   | Over-expressed |
| EFNA1       | 0.46 | 8.42E-03 | 0.0168   | Over-expressed |
| SYK         | 0.46 | 0.0103   | 0.0201   | Over-expressed |
| TRPV2       | 0.46 | 0.0105   | 0.0204   | Over-expressed |
| RNF144A     | 0.46 | 0.0123   | 0.0235   | Over-expressed |
| GRAMD1A     | 0.46 | 0.0162   | 0.0298   | Over-expressed |
| SLAMF8      | 0.46 | 0.017    | 0.0311   | Over-expressed |

|           |      |          |          |                |
|-----------|------|----------|----------|----------------|
| RARS      | 0.45 | 1.89E-10 | 4.15E-09 | Over-expressed |
| EIF2B4    | 0.45 | 2.18E-09 | 3.32E-08 | Over-expressed |
| SLC25A3   | 0.45 | 1.90E-08 | 2.15E-07 | Over-expressed |
| EIF4E2    | 0.45 | 1.92E-08 | 2.16E-07 | Over-expressed |
| AATF      | 0.45 | 3.68E-08 | 3.81E-07 | Over-expressed |
| MRPL9     | 0.45 | 5.40E-08 | 5.26E-07 | Over-expressed |
| GTF3C5    | 0.45 | 8.96E-08 | 8.15E-07 | Over-expressed |
| SNX5      | 0.45 | 9.15E-08 | 8.30E-07 | Over-expressed |
| ZNF394    | 0.45 | 1.12E-07 | 9.83E-07 | Over-expressed |
| OTUB1     | 0.45 | 1.14E-07 | 1.00E-06 | Over-expressed |
| IDH3B     | 0.45 | 1.67E-07 | 1.40E-06 | Over-expressed |
| SSBP1     | 0.45 | 1.75E-07 | 1.45E-06 | Over-expressed |
| LETMD1    | 0.45 | 2.75E-07 | 2.12E-06 | Over-expressed |
| MRPL48    | 0.45 | 2.98E-07 | 2.27E-06 | Over-expressed |
| CCT4      | 0.45 | 3.77E-07 | 2.76E-06 | Over-expressed |
| DRG1      | 0.45 | 3.98E-07 | 2.90E-06 | Over-expressed |
| KARS      | 0.45 | 9.13E-07 | 5.90E-06 | Over-expressed |
| PNKP      | 0.45 | 1.89E-06 | 1.10E-05 | Over-expressed |
| ZNF133    | 0.45 | 1.97E-06 | 1.14E-05 | Over-expressed |
| PSMA7     | 0.45 | 2.69E-06 | 1.49E-05 | Over-expressed |
| RNF113A   | 0.45 | 2.86E-06 | 1.58E-05 | Over-expressed |
| TPT1      | 0.45 | 4.69E-06 | 2.43E-05 | Over-expressed |
| CNIH4     | 0.45 | 5.42E-06 | 2.75E-05 | Over-expressed |
| NDUFB8    | 0.45 | 5.67E-06 | 2.86E-05 | Over-expressed |
| CHST12    | 0.45 | 1.07E-05 | 4.98E-05 | Over-expressed |
| COPS6     | 0.45 | 1.14E-05 | 5.25E-05 | Over-expressed |
| WDR18     | 0.45 | 1.20E-05 | 5.50E-05 | Over-expressed |
| NPEPL1    | 0.45 | 1.28E-05 | 5.84E-05 | Over-expressed |
| ZNF251    | 0.45 | 1.73E-05 | 7.55E-05 | Over-expressed |
| MIDN      | 0.45 | 2.38E-05 | 9.98E-05 | Over-expressed |
| NOL12     | 0.45 | 2.76E-05 | 1.14E-04 | Over-expressed |
| CIDECP1   | 0.45 | 3.45E-05 | 1.39E-04 | Over-expressed |
| MTX1      | 0.45 | 3.63E-05 | 1.45E-04 | Over-expressed |
| JTB       | 0.45 | 3.79E-05 | 1.50E-04 | Over-expressed |
| NPC2      | 0.45 | 6.99E-05 | 2.55E-04 | Over-expressed |
| SERPINB1  | 0.45 | 8.08E-05 | 2.91E-04 | Over-expressed |
| PSMD4     | 0.45 | 1.33E-04 | 4.52E-04 | Over-expressed |
| CNTD1     | 0.45 | 2.16E-04 | 6.88E-04 | Over-expressed |
| CBX8      | 0.45 | 2.18E-04 | 6.92E-04 | Over-expressed |
| RAVER1    | 0.45 | 2.57E-04 | 7.99E-04 | Over-expressed |
| SPATA33   | 0.45 | 2.91E-04 | 8.90E-04 | Over-expressed |
| EXT1      | 0.45 | 3.74E-04 | 1.11E-03 | Over-expressed |
| C19ORF25  | 0.45 | 4.32E-04 | 1.26E-03 | Over-expressed |
| TSSC2     | 0.45 | 7.98E-04 | 2.14E-03 | Over-expressed |
| LOC642846 | 0.45 | 8.29E-04 | 2.21E-03 | Over-expressed |
| MYBBP1A   | 0.45 | 9.59E-04 | 2.51E-03 | Over-expressed |
| MRPL24    | 0.45 | 1.63E-03 | 3.98E-03 | Over-expressed |
| TMEM219   | 0.45 | 1.83E-03 | 4.40E-03 | Over-expressed |
| DOK3      | 0.45 | 1.87E-03 | 4.47E-03 | Over-expressed |
| PPT2      | 0.45 | 2.29E-03 | 5.36E-03 | Over-expressed |
| TRIP6     | 0.45 | 2.67E-03 | 6.15E-03 | Over-expressed |
| HSD11B1L  | 0.45 | 3.18E-03 | 7.17E-03 | Over-expressed |
| CSPP1     | 0.45 | 3.56E-03 | 7.88E-03 | Over-expressed |
| MAN1B1-DT | 0.45 | 4.74E-03 | 0.0102   | Over-expressed |
| GMDS      | 0.45 | 5.90E-03 | 0.0123   | Over-expressed |
| ATOX1     | 0.45 | 7.13E-03 | 0.0145   | Over-expressed |
| ENDOG     | 0.45 | 8.73E-03 | 0.0174   | Over-expressed |

|          |      |          |          |                |
|----------|------|----------|----------|----------------|
| TMEM198  | 0.45 | 0.012    | 0.0229   | Over-expressed |
| MINDY4   | 0.45 | 0.0148   | 0.0275   | Over-expressed |
| CCDC102A | 0.45 | 0.0196   | 0.0352   | Over-expressed |
| EXO1     | 0.45 | 0.0255   | 0.0445   | Over-expressed |
| UBE2V1   | 0.44 | 5.82E-11 | 1.56E-09 | Over-expressed |
| NFU1     | 0.44 | 1.18E-09 | 1.98E-08 | Over-expressed |
| CWF19L1  | 0.44 | 1.29E-09 | 2.13E-08 | Over-expressed |
| SRSF9    | 0.44 | 5.90E-09 | 7.82E-08 | Over-expressed |
| HTRA2    | 0.44 | 2.69E-08 | 2.90E-07 | Over-expressed |
| DCTN2    | 0.44 | 3.08E-08 | 3.26E-07 | Over-expressed |
| NEDD8    | 0.44 | 3.85E-08 | 3.96E-07 | Over-expressed |
| LAMTOR5  | 0.44 | 1.23E-07 | 1.07E-06 | Over-expressed |
| RTRAF    | 0.44 | 1.44E-07 | 1.23E-06 | Over-expressed |
| PPIE     | 0.44 | 2.05E-07 | 1.65E-06 | Over-expressed |
| HDGFL2   | 0.44 | 3.34E-07 | 2.49E-06 | Over-expressed |
| USF1     | 0.44 | 4.92E-07 | 3.48E-06 | Over-expressed |
| BRD9     | 0.44 | 5.99E-07 | 4.13E-06 | Over-expressed |
| GLRX3    | 0.44 | 1.36E-06 | 8.29E-06 | Over-expressed |
| DNAJC2   | 0.44 | 1.80E-06 | 1.05E-05 | Over-expressed |
| MOB3A    | 0.44 | 6.91E-06 | 3.40E-05 | Over-expressed |
| C1ORF159 | 0.44 | 7.24E-06 | 3.54E-05 | Over-expressed |
| THG1L    | 0.44 | 8.95E-06 | 4.26E-05 | Over-expressed |
| PFDN2    | 0.44 | 1.14E-05 | 5.28E-05 | Over-expressed |
| ZSCAN16  | 0.44 | 5.39E-05 | 2.04E-04 | Over-expressed |
| GPATCH4  | 0.44 | 6.07E-05 | 2.26E-04 | Over-expressed |
| PRRT3    | 0.44 | 1.03E-04 | 3.61E-04 | Over-expressed |
| PIN4     | 0.44 | 1.04E-04 | 3.64E-04 | Over-expressed |
| PHETA1   | 0.44 | 1.16E-04 | 4.00E-04 | Over-expressed |
| LMNA     | 0.44 | 1.23E-04 | 4.22E-04 | Over-expressed |
| COX6A1   | 0.44 | 1.53E-04 | 5.07E-04 | Over-expressed |
| TUBB4B   | 0.44 | 4.05E-04 | 1.19E-03 | Over-expressed |
| MSRB2    | 0.44 | 8.85E-04 | 2.34E-03 | Over-expressed |
| CCDC134  | 0.44 | 9.56E-04 | 2.51E-03 | Over-expressed |
| CTDSPL   | 0.44 | 1.17E-03 | 2.98E-03 | Over-expressed |
| SULT1A3  | 0.44 | 2.40E-03 | 5.61E-03 | Over-expressed |
| CCDC34   | 0.44 | 2.42E-03 | 5.65E-03 | Over-expressed |
| FERMT3   | 0.44 | 4.11E-03 | 8.95E-03 | Over-expressed |
| CDC42EP1 | 0.44 | 4.11E-03 | 8.96E-03 | Over-expressed |
| ATP1B3   | 0.44 | 4.71E-03 | 0.0101   | Over-expressed |
| MRPL55   | 0.44 | 5.15E-03 | 0.0109   | Over-expressed |
| LY6G5C   | 0.44 | 7.35E-03 | 0.0149   | Over-expressed |
| UBE2E2   | 0.44 | 7.70E-03 | 0.0155   | Over-expressed |
| CYTH4    | 0.44 | 8.93E-03 | 0.0177   | Over-expressed |
| ANXA2R   | 0.44 | 0.0112   | 0.0215   | Over-expressed |
| ABHD11   | 0.44 | 0.0114   | 0.0218   | Over-expressed |
| HSD17B1  | 0.44 | 0.0147   | 0.0273   | Over-expressed |
| TP53     | 0.44 | 0.0207   | 0.0369   | Over-expressed |
| POU2F2   | 0.44 | 0.0241   | 0.0423   | Over-expressed |
| LAT2     | 0.44 | 0.0247   | 0.0432   | Over-expressed |
| ZNF526   | 0.43 | 8.22E-09 | 1.04E-07 | Over-expressed |
| KXD1     | 0.43 | 3.33E-08 | 3.49E-07 | Over-expressed |
| PRKRIP1  | 0.43 | 8.31E-08 | 7.62E-07 | Over-expressed |
| YWHAE    | 0.43 | 9.30E-08 | 8.42E-07 | Over-expressed |
| ZNF511   | 0.43 | 1.37E-07 | 1.18E-06 | Over-expressed |
| SDHAF2   | 0.43 | 1.67E-07 | 1.40E-06 | Over-expressed |
| VPS72    | 0.43 | 4.42E-07 | 3.17E-06 | Over-expressed |
| PBDC1    | 0.43 | 4.99E-07 | 3.52E-06 | Over-expressed |

|           |      |          |          |                |
|-----------|------|----------|----------|----------------|
| GRWD1     | 0.43 | 8.97E-07 | 5.81E-06 | Over-expressed |
| PSMA4     | 0.43 | 1.17E-06 | 7.30E-06 | Over-expressed |
| CAMLG     | 0.43 | 1.18E-06 | 7.31E-06 | Over-expressed |
| EIPR1     | 0.43 | 2.45E-06 | 1.38E-05 | Over-expressed |
| DHX37     | 0.43 | 2.70E-06 | 1.49E-05 | Over-expressed |
| CUEDC2    | 0.43 | 3.05E-06 | 1.67E-05 | Over-expressed |
| SENP3     | 0.43 | 3.13E-06 | 1.70E-05 | Over-expressed |
| ARF5      | 0.43 | 3.88E-06 | 2.06E-05 | Over-expressed |
| ZFPL1     | 0.43 | 5.02E-06 | 2.58E-05 | Over-expressed |
| SERF1A    | 0.43 | 8.33E-06 | 4.00E-05 | Over-expressed |
| YBX1      | 0.43 | 9.87E-06 | 4.64E-05 | Over-expressed |
| POLR2K    | 0.43 | 1.55E-05 | 6.84E-05 | Over-expressed |
| CLASRP    | 0.43 | 1.73E-05 | 7.55E-05 | Over-expressed |
| FUNDC1    | 0.43 | 1.88E-05 | 8.10E-05 | Over-expressed |
| SAAL1     | 0.43 | 2.40E-05 | 1.01E-04 | Over-expressed |
| XPO5      | 0.43 | 3.12E-05 | 1.27E-04 | Over-expressed |
| VAR5      | 0.43 | 4.53E-05 | 1.75E-04 | Over-expressed |
| ARL3      | 0.43 | 4.92E-05 | 1.88E-04 | Over-expressed |
| MALSU1    | 0.43 | 5.01E-05 | 1.91E-04 | Over-expressed |
| GEMIN4    | 0.43 | 6.04E-05 | 2.25E-04 | Over-expressed |
| CD276     | 0.43 | 6.15E-05 | 2.29E-04 | Over-expressed |
| AKT1S1    | 0.43 | 8.55E-05 | 3.06E-04 | Over-expressed |
| PPIL1     | 0.43 | 1.62E-04 | 5.34E-04 | Over-expressed |
| MORN2     | 0.43 | 1.83E-04 | 5.97E-04 | Over-expressed |
| LYAR      | 0.43 | 1.96E-04 | 6.32E-04 | Over-expressed |
| PACS1     | 0.43 | 1.99E-04 | 6.42E-04 | Over-expressed |
| CHCHD6    | 0.43 | 2.31E-04 | 7.26E-04 | Over-expressed |
| NAXE      | 0.43 | 2.52E-04 | 7.84E-04 | Over-expressed |
| AIFM2     | 0.43 | 3.18E-04 | 9.64E-04 | Over-expressed |
| EGLN2     | 0.43 | 3.35E-04 | 1.01E-03 | Over-expressed |
| DNAJC4    | 0.43 | 3.88E-04 | 1.14E-03 | Over-expressed |
| CACFD1    | 0.43 | 5.40E-04 | 1.52E-03 | Over-expressed |
| SHLD1     | 0.43 | 5.51E-04 | 1.55E-03 | Over-expressed |
| VAT1      | 0.43 | 6.89E-04 | 1.88E-03 | Over-expressed |
| FAM49B    | 0.43 | 1.06E-03 | 2.74E-03 | Over-expressed |
| P2RY11    | 0.43 | 1.52E-03 | 3.73E-03 | Over-expressed |
| ABHD16B   | 0.43 | 1.57E-03 | 3.84E-03 | Over-expressed |
| TSPAN4    | 0.43 | 2.37E-03 | 5.53E-03 | Over-expressed |
| PDE7A     | 0.43 | 2.48E-03 | 5.77E-03 | Over-expressed |
| PSME2     | 0.43 | 3.72E-03 | 8.18E-03 | Over-expressed |
| C17ORF100 | 0.43 | 3.79E-03 | 8.32E-03 | Over-expressed |
| GPD1L     | 0.43 | 7.09E-03 | 0.0144   | Over-expressed |
| SLC26A6   | 0.43 | 0.0171   | 0.0312   | Over-expressed |
| PPARG     | 0.43 | 0.0199   | 0.0357   | Over-expressed |
| MATK      | 0.43 | 0.0226   | 0.0399   | Over-expressed |
| ATP2A3    | 0.43 | 0.0268   | 0.0465   | Over-expressed |
| RBM22     | 0.42 | 1.02E-10 | 2.51E-09 | Over-expressed |
| PABPN1    | 0.42 | 1.44E-10 | 3.34E-09 | Over-expressed |
| SLC35C2   | 0.42 | 1.48E-09 | 2.37E-08 | Over-expressed |
| SUMO2     | 0.42 | 2.45E-09 | 3.67E-08 | Over-expressed |
| CBX3      | 0.42 | 3.79E-09 | 5.36E-08 | Over-expressed |
| DIABLO    | 0.42 | 5.52E-08 | 5.35E-07 | Over-expressed |
| MRPS30    | 0.42 | 2.84E-07 | 2.17E-06 | Over-expressed |
| ADPRHL2   | 0.42 | 3.74E-07 | 2.74E-06 | Over-expressed |
| SEC11A    | 0.42 | 5.21E-07 | 3.65E-06 | Over-expressed |
| DUSP12    | 0.42 | 5.42E-07 | 3.78E-06 | Over-expressed |
| IMP3      | 0.42 | 9.41E-07 | 6.06E-06 | Over-expressed |

|           |      |          |          |                |
|-----------|------|----------|----------|----------------|
| MRPS23    | 0.42 | 9.63E-07 | 6.18E-06 | Over-expressed |
| MED10     | 0.42 | 1.36E-06 | 8.26E-06 | Over-expressed |
| TMEM9     | 0.42 | 1.76E-06 | 1.04E-05 | Over-expressed |
| CCT7      | 0.42 | 1.99E-06 | 1.15E-05 | Over-expressed |
| ING5      | 0.42 | 2.33E-06 | 1.32E-05 | Over-expressed |
| DOHH      | 0.42 | 2.48E-06 | 1.39E-05 | Over-expressed |
| GARS      | 0.42 | 2.80E-06 | 1.55E-05 | Over-expressed |
| PSMB4     | 0.42 | 4.85E-06 | 2.50E-05 | Over-expressed |
| COA4      | 0.42 | 6.22E-06 | 3.10E-05 | Over-expressed |
| RAD9A     | 0.42 | 7.57E-06 | 3.68E-05 | Over-expressed |
| DCTN5     | 0.42 | 8.43E-06 | 4.05E-05 | Over-expressed |
| MRPL2     | 0.42 | 1.01E-05 | 4.73E-05 | Over-expressed |
| BLOC1S3   | 0.42 | 1.16E-05 | 5.34E-05 | Over-expressed |
| PSMC5     | 0.42 | 1.19E-05 | 5.47E-05 | Over-expressed |
| IRGQ      | 0.42 | 1.21E-05 | 5.56E-05 | Over-expressed |
| PPIAL4C   | 0.42 | 1.85E-05 | 8.02E-05 | Over-expressed |
| EXOSC6    | 0.42 | 2.45E-05 | 1.02E-04 | Over-expressed |
| NUP37     | 0.42 | 3.30E-05 | 1.33E-04 | Over-expressed |
| MYPOP     | 0.42 | 3.40E-05 | 1.37E-04 | Over-expressed |
| MLST8     | 0.42 | 4.35E-05 | 1.69E-04 | Over-expressed |
| EIF3CL    | 0.42 | 4.48E-05 | 1.73E-04 | Over-expressed |
| CDK16     | 0.42 | 4.62E-05 | 1.78E-04 | Over-expressed |
| DDX49     | 0.42 | 7.31E-05 | 2.66E-04 | Over-expressed |
| SYMPK     | 0.42 | 1.05E-04 | 3.65E-04 | Over-expressed |
| MFNG      | 0.42 | 1.90E-04 | 6.16E-04 | Over-expressed |
| METTL9    | 0.42 | 1.99E-04 | 6.41E-04 | Over-expressed |
| MAPRE1    | 0.42 | 2.21E-04 | 7.00E-04 | Over-expressed |
| RFC4      | 0.42 | 3.24E-04 | 9.77E-04 | Over-expressed |
| FTH1P3    | 0.42 | 5.48E-04 | 1.54E-03 | Over-expressed |
| PMS2P3    | 0.42 | 5.76E-04 | 1.61E-03 | Over-expressed |
| LIPT2     | 0.42 | 5.78E-04 | 1.61E-03 | Over-expressed |
| TAGLN2    | 0.42 | 7.76E-04 | 2.09E-03 | Over-expressed |
| ABCA11P   | 0.42 | 8.65E-04 | 2.30E-03 | Over-expressed |
| SMDT1     | 0.42 | 1.35E-03 | 3.37E-03 | Over-expressed |
| ARHGAP45  | 0.42 | 1.41E-03 | 3.51E-03 | Over-expressed |
| SMIM29    | 0.42 | 1.43E-03 | 3.54E-03 | Over-expressed |
| RBPMS     | 0.42 | 1.44E-03 | 3.56E-03 | Over-expressed |
| MTMR2     | 0.42 | 1.71E-03 | 4.15E-03 | Over-expressed |
| ASH1L-AS1 | 0.42 | 1.90E-03 | 4.54E-03 | Over-expressed |
| CLBA1     | 0.42 | 2.37E-03 | 5.53E-03 | Over-expressed |
| BTG1      | 0.42 | 2.86E-03 | 6.54E-03 | Over-expressed |
| REEP4     | 0.42 | 2.95E-03 | 6.72E-03 | Over-expressed |
| TXN       | 0.42 | 3.42E-03 | 7.64E-03 | Over-expressed |
| SEC11C    | 0.42 | 4.68E-03 | 0.0101   | Over-expressed |
| MYL5      | 0.42 | 7.07E-03 | 0.0144   | Over-expressed |
| NTHL1     | 0.42 | 8.99E-03 | 0.0178   | Over-expressed |
| L3MBTL1   | 0.42 | 9.01E-03 | 0.0178   | Over-expressed |
| GLIPR2    | 0.42 | 9.25E-03 | 0.0182   | Over-expressed |
| S1PR5     | 0.42 | 9.87E-03 | 0.0193   | Over-expressed |
| PERP      | 0.42 | 0.0136   | 0.0255   | Over-expressed |
| ZNF600    | 0.42 | 0.0196   | 0.0353   | Over-expressed |
| DUSP8     | 0.42 | 0.0216   | 0.0384   | Over-expressed |
| CDC6      | 0.42 | 0.0219   | 0.0389   | Over-expressed |
| MAD2L1    | 0.42 | 0.0285   | 0.0492   | Over-expressed |
| PDCD6     | 0.41 | 1.42E-10 | 3.31E-09 | Over-expressed |
| BCCIP     | 0.41 | 2.00E-09 | 3.07E-08 | Over-expressed |
| C14ORF119 | 0.41 | 9.38E-09 | 1.16E-07 | Over-expressed |

|           |      |          |          |                |
|-----------|------|----------|----------|----------------|
| LOC643387 | 0.41 | 4.06E-08 | 4.14E-07 | Over-expressed |
| SUPV3L1   | 0.41 | 7.79E-08 | 7.19E-07 | Over-expressed |
| EIF5B     | 0.41 | 1.72E-07 | 1.43E-06 | Over-expressed |
| SUB1      | 0.41 | 6.85E-07 | 4.63E-06 | Over-expressed |
| CBY1      | 0.41 | 6.89E-07 | 4.66E-06 | Over-expressed |
| LTA4H     | 0.41 | 7.15E-07 | 4.81E-06 | Over-expressed |
| EIF3I     | 0.41 | 7.90E-07 | 5.22E-06 | Over-expressed |
| PDAP1     | 0.41 | 9.43E-07 | 6.07E-06 | Over-expressed |
| COPS3     | 0.41 | 1.09E-06 | 6.84E-06 | Over-expressed |
| ALKBH4    | 0.41 | 1.64E-06 | 9.75E-06 | Over-expressed |
| PHF23     | 0.41 | 2.15E-06 | 1.23E-05 | Over-expressed |
| RNF216P1  | 0.41 | 2.24E-06 | 1.27E-05 | Over-expressed |
| ZNF408    | 0.41 | 3.28E-06 | 1.77E-05 | Over-expressed |
| CSNK2A2   | 0.41 | 3.72E-06 | 1.98E-05 | Over-expressed |
| GYG1      | 0.41 | 4.32E-06 | 2.26E-05 | Over-expressed |
| FRA10AC1  | 0.41 | 4.97E-06 | 2.55E-05 | Over-expressed |
| CCT2      | 0.41 | 6.15E-06 | 3.07E-05 | Over-expressed |
| PAF1      | 0.41 | 1.02E-05 | 4.79E-05 | Over-expressed |
| NDUFB3    | 0.41 | 1.24E-05 | 5.68E-05 | Over-expressed |
| NDUFC1    | 0.41 | 1.38E-05 | 6.22E-05 | Over-expressed |
| TMED1     | 0.41 | 1.43E-05 | 6.42E-05 | Over-expressed |
| MRPL36    | 0.41 | 1.46E-05 | 6.51E-05 | Over-expressed |
| PPP4C     | 0.41 | 2.01E-05 | 8.63E-05 | Over-expressed |
| TRNAU1AP  | 0.41 | 2.06E-05 | 8.81E-05 | Over-expressed |
| ZFAND1    | 0.41 | 3.10E-05 | 1.26E-04 | Over-expressed |
| BUD23     | 0.41 | 3.19E-05 | 1.29E-04 | Over-expressed |
| SUGT1     | 0.41 | 4.32E-05 | 1.68E-04 | Over-expressed |
| MTA3      | 0.41 | 4.80E-05 | 1.84E-04 | Over-expressed |
| RFC2      | 0.41 | 5.06E-05 | 1.93E-04 | Over-expressed |
| ZNRF1     | 0.41 | 5.85E-05 | 2.19E-04 | Over-expressed |
| MRPL15    | 0.41 | 7.44E-05 | 2.70E-04 | Over-expressed |
| ATP6V0E1  | 0.41 | 1.41E-04 | 4.71E-04 | Over-expressed |
| C1ORF216  | 0.41 | 2.20E-04 | 6.98E-04 | Over-expressed |
| CLPP      | 0.41 | 2.39E-04 | 7.50E-04 | Over-expressed |
| RPUSD1    | 0.41 | 2.67E-04 | 8.24E-04 | Over-expressed |
| NUDT16L1  | 0.41 | 3.23E-04 | 9.75E-04 | Over-expressed |
| SLC7A6    | 0.41 | 3.76E-04 | 1.11E-03 | Over-expressed |
| RHOC      | 0.41 | 5.25E-04 | 1.49E-03 | Over-expressed |
| TMEM120A  | 0.41 | 7.52E-04 | 2.03E-03 | Over-expressed |
| NR2F6     | 0.41 | 8.56E-04 | 2.28E-03 | Over-expressed |
| MIS18A    | 0.41 | 8.84E-04 | 2.34E-03 | Over-expressed |
| GIPC1     | 0.41 | 1.28E-03 | 3.23E-03 | Over-expressed |
| CEP131    | 0.41 | 1.35E-03 | 3.37E-03 | Over-expressed |
| DSE       | 0.41 | 1.41E-03 | 3.51E-03 | Over-expressed |
| ARVCF     | 0.41 | 1.43E-03 | 3.54E-03 | Over-expressed |
| CLSTN1    | 0.41 | 3.19E-03 | 7.19E-03 | Over-expressed |
| RSKR      | 0.41 | 3.24E-03 | 7.28E-03 | Over-expressed |
| PARVG     | 0.41 | 8.07E-03 | 0.0162   | Over-expressed |
| IL27RA    | 0.41 | 9.16E-03 | 0.0181   | Over-expressed |
| KIZ       | 0.41 | 0.0157   | 0.0289   | Over-expressed |
| C5ORF34   | 0.41 | 0.017    | 0.031    | Over-expressed |
| MMD       | 0.41 | 0.0173   | 0.0314   | Over-expressed |
| ZWINT     | 0.41 | 0.0185   | 0.0334   | Over-expressed |
| PRNP      | 0.41 | 0.02     | 0.0358   | Over-expressed |
| PRKAR1B   | 0.41 | 0.0224   | 0.0396   | Over-expressed |
| PARL      | 0.4  | 1.56E-10 | 3.57E-09 | Over-expressed |
| CCDC127   | 0.4  | 2.78E-09 | 4.11E-08 | Over-expressed |



|            |      |          |          |                |
|------------|------|----------|----------|----------------|
| ZNHIT3     | 0.4  | 2.67E-08 | 2.88E-07 | Over-expressed |
| DDX54      | 0.4  | 3.12E-08 | 3.30E-07 | Over-expressed |
| ANXA11     | 0.4  | 1.49E-07 | 1.27E-06 | Over-expressed |
| UBE2L3     | 0.4  | 3.71E-07 | 2.73E-06 | Over-expressed |
| SCAND2P    | 0.4  | 5.72E-07 | 3.96E-06 | Over-expressed |
| RASSF1     | 0.4  | 8.82E-07 | 5.74E-06 | Over-expressed |
| XRCC6      | 0.4  | 1.12E-06 | 7.04E-06 | Over-expressed |
| THAP4      | 0.4  | 1.54E-06 | 9.19E-06 | Over-expressed |
| PPP1CA     | 0.4  | 1.85E-06 | 1.08E-05 | Over-expressed |
| MRPL45     | 0.4  | 3.39E-06 | 1.82E-05 | Over-expressed |
| UBAC2      | 0.4  | 1.21E-05 | 5.56E-05 | Over-expressed |
| MED11      | 0.4  | 6.67E-05 | 2.45E-04 | Over-expressed |
| GGCT       | 0.4  | 6.81E-05 | 2.50E-04 | Over-expressed |
| SH3GLB2    | 0.4  | 7.04E-05 | 2.57E-04 | Over-expressed |
| FAM86DP    | 0.4  | 1.08E-04 | 3.75E-04 | Over-expressed |
| TRABD      | 0.4  | 2.22E-04 | 7.02E-04 | Over-expressed |
| ZFYVE19    | 0.4  | 2.62E-04 | 8.13E-04 | Over-expressed |
| SS18L2     | 0.4  | 3.83E-04 | 1.13E-03 | Over-expressed |
| PPM1M      | 0.4  | 3.88E-04 | 1.14E-03 | Over-expressed |
| PPT1       | 0.4  | 4.25E-04 | 1.24E-03 | Over-expressed |
| ZC3H3      | 0.4  | 4.71E-04 | 1.35E-03 | Over-expressed |
| STXBP2     | 0.4  | 6.09E-04 | 1.69E-03 | Over-expressed |
| NDOR1      | 0.4  | 6.85E-04 | 1.87E-03 | Over-expressed |
| TMEM161A   | 0.4  | 7.01E-04 | 1.91E-03 | Over-expressed |
| KIFC3      | 0.4  | 9.75E-04 | 2.54E-03 | Over-expressed |
| CASP4      | 0.4  | 1.13E-03 | 2.90E-03 | Over-expressed |
| LINC01011  | 0.4  | 1.22E-03 | 3.10E-03 | Over-expressed |
| TMEM106C   | 0.4  | 1.44E-03 | 3.57E-03 | Over-expressed |
| IFT22      | 0.4  | 1.72E-03 | 4.18E-03 | Over-expressed |
| EEF2KMT    | 0.4  | 1.74E-03 | 4.22E-03 | Over-expressed |
| PM20D2     | 0.4  | 9.87E-03 | 0.0193   | Over-expressed |
| ST20       | 0.4  | 0.0128   | 0.0243   | Over-expressed |
| SELPLG     | 0.4  | 0.0171   | 0.0311   | Over-expressed |
| MOK        | 0.4  | 0.0177   | 0.0321   | Over-expressed |
| SDF2L1     | 0.4  | 0.0177   | 0.0322   | Over-expressed |
| BAIAP2L1   | 0.4  | 0.0244   | 0.0429   | Over-expressed |
| SF3B6      | 0.39 | 9.09E-10 | 1.57E-08 | Over-expressed |
| CPSF3      | 0.39 | 2.23E-07 | 1.77E-06 | Over-expressed |
| DMAC2      | 0.39 | 3.28E-07 | 2.46E-06 | Over-expressed |
| CRNKL1     | 0.39 | 3.85E-07 | 2.81E-06 | Over-expressed |
| ANAPC7     | 0.39 | 5.94E-07 | 4.10E-06 | Over-expressed |
| MMS19      | 0.39 | 8.36E-07 | 5.47E-06 | Over-expressed |
| MAZ        | 0.39 | 9.28E-07 | 5.98E-06 | Over-expressed |
| PSMD9      | 0.39 | 9.46E-07 | 6.08E-06 | Over-expressed |
| ATP5F1C    | 0.39 | 2.13E-06 | 1.22E-05 | Over-expressed |
| MRPL1      | 0.39 | 2.58E-06 | 1.44E-05 | Over-expressed |
| BRK1       | 0.39 | 4.14E-06 | 2.18E-05 | Over-expressed |
| ATG7       | 0.39 | 4.98E-06 | 2.56E-05 | Over-expressed |
| NDUFA9     | 0.39 | 8.91E-06 | 4.25E-05 | Over-expressed |
| ARPC1A     | 0.39 | 1.43E-05 | 6.39E-05 | Over-expressed |
| CFDP1      | 0.39 | 1.72E-05 | 7.51E-05 | Over-expressed |
| WDR83      | 0.39 | 1.83E-05 | 7.93E-05 | Over-expressed |
| VPS51      | 0.39 | 2.97E-05 | 1.21E-04 | Over-expressed |
| DTX2       | 0.39 | 3.53E-05 | 1.41E-04 | Over-expressed |
| FAM104B    | 0.39 | 3.86E-05 | 1.53E-04 | Over-expressed |
| ZBTB11-AS1 | 0.39 | 3.90E-05 | 1.54E-04 | Over-expressed |
| SMIM11A    | 0.39 | 5.26E-05 | 2.00E-04 | Over-expressed |

|           |      |          |          |                |
|-----------|------|----------|----------|----------------|
| HSP90AB1  | 0.39 | 9.26E-05 | 3.28E-04 | Over-expressed |
| ZNF780A   | 0.39 | 1.14E-04 | 3.95E-04 | Over-expressed |
| GMPPA     | 0.39 | 1.34E-04 | 4.53E-04 | Over-expressed |
| TDP2      | 0.39 | 1.43E-04 | 4.78E-04 | Over-expressed |
| MIEN1     | 0.39 | 1.63E-04 | 5.37E-04 | Over-expressed |
| POP4      | 0.39 | 2.34E-04 | 7.37E-04 | Over-expressed |
| ARMC7     | 0.39 | 2.61E-04 | 8.09E-04 | Over-expressed |
| CISD1     | 0.39 | 4.46E-04 | 1.29E-03 | Over-expressed |
| NEU1      | 0.39 | 5.20E-04 | 1.48E-03 | Over-expressed |
| POMP      | 0.39 | 6.62E-04 | 1.82E-03 | Over-expressed |
| PLD2      | 0.39 | 6.85E-04 | 1.87E-03 | Over-expressed |
| PTDSS1    | 0.39 | 7.38E-04 | 2.00E-03 | Over-expressed |
| TVP23C    | 0.39 | 8.09E-04 | 2.17E-03 | Over-expressed |
| ATAD3A    | 0.39 | 1.00E-03 | 2.61E-03 | Over-expressed |
| AGO2      | 0.39 | 1.91E-03 | 4.57E-03 | Over-expressed |
| RRAS      | 0.39 | 2.28E-03 | 5.35E-03 | Over-expressed |
| PRDX1     | 0.39 | 2.75E-03 | 6.31E-03 | Over-expressed |
| SPI1      | 0.39 | 7.49E-03 | 0.0152   | Over-expressed |
| SIL1      | 0.39 | 7.61E-03 | 0.0154   | Over-expressed |
| CEP72     | 0.39 | 0.0106   | 0.0206   | Over-expressed |
| CXCL16    | 0.39 | 0.013    | 0.0245   | Over-expressed |
| SAT2      | 0.39 | 0.0144   | 0.0269   | Over-expressed |
| SCN1B     | 0.39 | 0.0146   | 0.0272   | Over-expressed |
| GSN       | 0.39 | 0.0212   | 0.0377   | Over-expressed |
| SRRM2-AS1 | 0.39 | 0.0251   | 0.0438   | Over-expressed |
| PARPBP    | 0.39 | 0.0267   | 0.0463   | Over-expressed |
| NRGN      | 0.39 | 0.0278   | 0.0481   | Over-expressed |
| KHDRBS1   | 0.38 | 1.16E-10 | 2.77E-09 | Over-expressed |
| SRSF3     | 0.38 | 8.80E-10 | 1.54E-08 | Over-expressed |
| LEMD2     | 0.38 | 2.73E-08 | 2.94E-07 | Over-expressed |
| AUP1      | 0.38 | 7.14E-08 | 6.68E-07 | Over-expressed |
| MRPS9     | 0.38 | 2.26E-07 | 1.79E-06 | Over-expressed |
| BCS1L     | 0.38 | 4.12E-07 | 2.99E-06 | Over-expressed |
| SDF2      | 0.38 | 7.24E-07 | 4.85E-06 | Over-expressed |
| PTMA      | 0.38 | 1.05E-06 | 6.69E-06 | Over-expressed |
| SUPT5H    | 0.38 | 3.08E-06 | 1.68E-05 | Over-expressed |
| FKBP3     | 0.38 | 4.74E-06 | 2.45E-05 | Over-expressed |
| FAM89B    | 0.38 | 5.68E-06 | 2.86E-05 | Over-expressed |
| WDR77     | 0.38 | 9.90E-06 | 4.65E-05 | Over-expressed |
| MRPS7     | 0.38 | 1.32E-05 | 5.97E-05 | Over-expressed |
| UBL7      | 0.38 | 2.23E-05 | 9.43E-05 | Over-expressed |
| INPP5K    | 0.38 | 3.02E-05 | 1.23E-04 | Over-expressed |
| COPS5     | 0.38 | 3.09E-05 | 1.26E-04 | Over-expressed |
| PRPSAP2   | 0.38 | 3.51E-05 | 1.41E-04 | Over-expressed |
| SLC35B2   | 0.38 | 3.90E-05 | 1.54E-04 | Over-expressed |
| ERI3      | 0.38 | 4.50E-05 | 1.74E-04 | Over-expressed |
| FRG1      | 0.38 | 6.18E-05 | 2.29E-04 | Over-expressed |
| SIPA1     | 0.38 | 7.22E-05 | 2.63E-04 | Over-expressed |
| WDR73     | 0.38 | 1.03E-04 | 3.60E-04 | Over-expressed |
| MAGEF1    | 0.38 | 1.17E-04 | 4.03E-04 | Over-expressed |
| THYN1     | 0.38 | 1.34E-04 | 4.55E-04 | Over-expressed |
| CREB3     | 0.38 | 1.49E-04 | 4.95E-04 | Over-expressed |
| GIT1      | 0.38 | 1.49E-04 | 4.96E-04 | Over-expressed |
| SEC61B    | 0.38 | 1.63E-04 | 5.38E-04 | Over-expressed |
| MMP19     | 0.38 | 1.91E-04 | 6.21E-04 | Over-expressed |
| GNPDA1    | 0.38 | 2.04E-04 | 6.55E-04 | Over-expressed |
| ATP5PD    | 0.38 | 2.55E-04 | 7.92E-04 | Over-expressed |

|              |      |          |          |                |
|--------------|------|----------|----------|----------------|
| NDUFV3       | 0.38 | 2.65E-04 | 8.20E-04 | Over-expressed |
| CDK10        | 0.38 | 2.99E-04 | 9.11E-04 | Over-expressed |
| RNF126       | 0.38 | 2.99E-04 | 9.12E-04 | Over-expressed |
| DUS2         | 0.38 | 3.16E-04 | 9.58E-04 | Over-expressed |
| COX8A        | 0.38 | 5.02E-04 | 1.43E-03 | Over-expressed |
| MRPL40       | 0.38 | 5.05E-04 | 1.44E-03 | Over-expressed |
| PDLIM1       | 0.38 | 5.33E-04 | 1.51E-03 | Over-expressed |
| SLC12A9      | 0.38 | 5.40E-04 | 1.52E-03 | Over-expressed |
| THAP7        | 0.38 | 5.50E-04 | 1.55E-03 | Over-expressed |
| ATRIP        | 0.38 | 6.17E-04 | 1.71E-03 | Over-expressed |
| ITGB3BP      | 0.38 | 8.84E-04 | 2.34E-03 | Over-expressed |
| TMEM186      | 0.38 | 9.52E-04 | 2.50E-03 | Over-expressed |
| ZNF784       | 0.38 | 1.73E-03 | 4.20E-03 | Over-expressed |
| TMEM208      | 0.38 | 1.95E-03 | 4.66E-03 | Over-expressed |
| KIF22        | 0.38 | 2.03E-03 | 4.82E-03 | Over-expressed |
| NDUFAF6      | 0.38 | 2.21E-03 | 5.22E-03 | Over-expressed |
| CCT6P1       | 0.38 | 2.85E-03 | 6.51E-03 | Over-expressed |
| PIK3R2       | 0.38 | 2.91E-03 | 6.64E-03 | Over-expressed |
| MAD1L1       | 0.38 | 2.96E-03 | 6.73E-03 | Over-expressed |
| NDUFA1       | 0.38 | 3.14E-03 | 7.10E-03 | Over-expressed |
| PDCD4-AS1    | 0.38 | 3.37E-03 | 7.55E-03 | Over-expressed |
| RTKN         | 0.38 | 3.55E-03 | 7.87E-03 | Over-expressed |
| RBM38        | 0.38 | 3.67E-03 | 8.09E-03 | Over-expressed |
| SLC25A29     | 0.38 | 4.49E-03 | 9.68E-03 | Over-expressed |
| LOC100128288 | 0.38 | 6.79E-03 | 0.0139   | Over-expressed |
| EZH2         | 0.38 | 9.17E-03 | 0.0181   | Over-expressed |
| FLJ44635     | 0.38 | 0.0104   | 0.0202   | Over-expressed |
| AAMDC        | 0.38 | 0.0123   | 0.0235   | Over-expressed |
| GUSBP11      | 0.38 | 0.0163   | 0.03     | Over-expressed |
| TFEB         | 0.38 | 0.0177   | 0.0321   | Over-expressed |
| GRASP        | 0.38 | 0.0228   | 0.0402   | Over-expressed |
| RAB37        | 0.38 | 0.0236   | 0.0416   | Over-expressed |
| UBE2D2       | 0.37 | 4.46E-10 | 8.76E-09 | Over-expressed |
| HDAC3        | 0.37 | 6.78E-08 | 6.38E-07 | Over-expressed |
| CDK5RAP1     | 0.37 | 2.64E-07 | 2.04E-06 | Over-expressed |
| PYM1         | 0.37 | 2.96E-07 | 2.25E-06 | Over-expressed |
| THOC7        | 0.37 | 1.11E-06 | 6.98E-06 | Over-expressed |
| GID8         | 0.37 | 1.72E-06 | 1.01E-05 | Over-expressed |
| B4GALT3      | 0.37 | 3.44E-06 | 1.85E-05 | Over-expressed |
| TMEM120B     | 0.37 | 4.06E-06 | 2.15E-05 | Over-expressed |
| COPS7B       | 0.37 | 4.30E-06 | 2.26E-05 | Over-expressed |
| UBE2J2       | 0.37 | 8.00E-06 | 3.86E-05 | Over-expressed |
| ASXL1        | 0.37 | 1.41E-05 | 6.32E-05 | Over-expressed |
| WDR6         | 0.37 | 1.42E-05 | 6.39E-05 | Over-expressed |
| ILF2         | 0.37 | 1.44E-05 | 6.44E-05 | Over-expressed |
| ACBD6        | 0.37 | 2.06E-05 | 8.79E-05 | Over-expressed |
| VPS25        | 0.37 | 2.08E-05 | 8.89E-05 | Over-expressed |
| DAD1         | 0.37 | 2.21E-05 | 9.38E-05 | Over-expressed |
| CACYBP       | 0.37 | 2.70E-05 | 1.12E-04 | Over-expressed |
| TMEM42       | 0.37 | 2.84E-05 | 1.17E-04 | Over-expressed |
| HDAC1        | 0.37 | 3.69E-05 | 1.47E-04 | Over-expressed |
| DBNL         | 0.37 | 3.96E-05 | 1.56E-04 | Over-expressed |
| ERP29        | 0.37 | 4.61E-05 | 1.78E-04 | Over-expressed |
| SLC25A39     | 0.37 | 4.95E-05 | 1.89E-04 | Over-expressed |
| EXOSC2       | 0.37 | 5.02E-05 | 1.92E-04 | Over-expressed |
| ALG3         | 0.37 | 5.49E-05 | 2.07E-04 | Over-expressed |
| POLRMT       | 0.37 | 1.15E-04 | 3.96E-04 | Over-expressed |

|          |      |          |          |                |
|----------|------|----------|----------|----------------|
| CTNBNB1  | 0.37 | 1.23E-04 | 4.21E-04 | Over-expressed |
| BORCS8   | 0.37 | 1.37E-04 | 4.62E-04 | Over-expressed |
| DXO      | 0.37 | 1.43E-04 | 4.79E-04 | Over-expressed |
| RIOK1    | 0.37 | 1.62E-04 | 5.34E-04 | Over-expressed |
| RPIA     | 0.37 | 1.68E-04 | 5.53E-04 | Over-expressed |
| CARS2    | 0.37 | 1.70E-04 | 5.57E-04 | Over-expressed |
| PLSCR3   | 0.37 | 1.77E-04 | 5.78E-04 | Over-expressed |
| SMG5     | 0.37 | 1.81E-04 | 5.89E-04 | Over-expressed |
| DNAL4    | 0.37 | 1.94E-04 | 6.27E-04 | Over-expressed |
| PDXK     | 0.37 | 2.15E-04 | 6.84E-04 | Over-expressed |
| SAYS1    | 0.37 | 2.26E-04 | 7.14E-04 | Over-expressed |
| SIX5     | 0.37 | 2.28E-04 | 7.18E-04 | Over-expressed |
| SIRT7    | 0.37 | 2.61E-04 | 8.10E-04 | Over-expressed |
| CCDC77   | 0.37 | 2.78E-04 | 8.55E-04 | Over-expressed |
| NDUFA8   | 0.37 | 2.83E-04 | 8.67E-04 | Over-expressed |
| TMEM177  | 0.37 | 2.97E-04 | 9.07E-04 | Over-expressed |
| GNL3     | 0.37 | 3.51E-04 | 1.05E-03 | Over-expressed |
| SLC66A1  | 0.37 | 3.52E-04 | 1.05E-03 | Over-expressed |
| MUTYH    | 0.37 | 3.52E-04 | 1.05E-03 | Over-expressed |
| CCDC86   | 0.37 | 3.85E-04 | 1.14E-03 | Over-expressed |
| GYS1     | 0.37 | 4.77E-04 | 1.37E-03 | Over-expressed |
| COX17    | 0.37 | 4.79E-04 | 1.37E-03 | Over-expressed |
| RNASEH2B | 0.37 | 4.82E-04 | 1.38E-03 | Over-expressed |
| ABRAXAS1 | 0.37 | 5.10E-04 | 1.45E-03 | Over-expressed |
| ATP6V1C1 | 0.37 | 5.17E-04 | 1.47E-03 | Over-expressed |
| THAP8    | 0.37 | 5.47E-04 | 1.54E-03 | Over-expressed |
| CCNQ     | 0.37 | 8.61E-04 | 2.29E-03 | Over-expressed |
| MPZL1    | 0.37 | 1.17E-03 | 2.97E-03 | Over-expressed |
| NSMAF    | 0.37 | 1.44E-03 | 3.58E-03 | Over-expressed |
| TSPAN3   | 0.37 | 1.64E-03 | 3.99E-03 | Over-expressed |
| BRI3BP   | 0.37 | 2.26E-03 | 5.32E-03 | Over-expressed |
| NDUFAB1  | 0.37 | 2.41E-03 | 5.62E-03 | Over-expressed |
| LOC93622 | 0.37 | 4.07E-03 | 8.87E-03 | Over-expressed |
| RPP25L   | 0.37 | 4.99E-03 | 0.0106   | Over-expressed |
| IFT52    | 0.37 | 5.56E-03 | 0.0116   | Over-expressed |
| FAM86HP  | 0.37 | 6.17E-03 | 0.0128   | Over-expressed |
| FLT3LG   | 0.37 | 6.62E-03 | 0.0136   | Over-expressed |
| ILVBL    | 0.37 | 8.28E-03 | 0.0166   | Over-expressed |
| CISD3    | 0.37 | 0.0106   | 0.0206   | Over-expressed |
| EFHC1    | 0.37 | 0.0113   | 0.0216   | Over-expressed |
| CHD7     | 0.37 | 0.0117   | 0.0224   | Over-expressed |
| CHTF18   | 0.37 | 0.0144   | 0.0268   | Over-expressed |
| PPP1R15A | 0.37 | 0.0153   | 0.0283   | Over-expressed |
| LAMB2P1  | 0.37 | 0.0165   | 0.0302   | Over-expressed |
| ETV5     | 0.37 | 0.0209   | 0.0373   | Over-expressed |
| HLA-A    | 0.37 | 0.0242   | 0.0425   | Over-expressed |
| RNF7     | 0.36 | 3.14E-09 | 4.56E-08 | Over-expressed |
| PPM1G    | 0.36 | 2.87E-07 | 2.19E-06 | Over-expressed |
| TTC27    | 0.36 | 3.21E-07 | 2.42E-06 | Over-expressed |
| PPP1CC   | 0.36 | 3.53E-07 | 2.62E-06 | Over-expressed |
| TMEM18   | 0.36 | 1.01E-06 | 6.44E-06 | Over-expressed |
| PSMB5    | 0.36 | 1.48E-06 | 8.92E-06 | Over-expressed |
| SPPL3    | 0.36 | 1.82E-06 | 1.07E-05 | Over-expressed |
| ATRAID   | 0.36 | 1.89E-06 | 1.10E-05 | Over-expressed |
| SART1    | 0.36 | 3.06E-06 | 1.67E-05 | Over-expressed |
| ZNF628   | 0.36 | 7.52E-06 | 3.66E-05 | Over-expressed |
| MED19    | 0.36 | 1.11E-05 | 5.16E-05 | Over-expressed |

|           |      |          |          |                |
|-----------|------|----------|----------|----------------|
| SSB       | 0.36 | 1.25E-05 | 5.68E-05 | Over-expressed |
| C2ORF68   | 0.36 | 1.85E-05 | 8.00E-05 | Over-expressed |
| POLR2D    | 0.36 | 3.30E-05 | 1.33E-04 | Over-expressed |
| DALRD3    | 0.36 | 4.24E-05 | 1.66E-04 | Over-expressed |
| TOMM20    | 0.36 | 4.29E-05 | 1.67E-04 | Over-expressed |
| SELENOS   | 0.36 | 4.54E-05 | 1.75E-04 | Over-expressed |
| DLGAP4    | 0.36 | 4.82E-05 | 1.85E-04 | Over-expressed |
| METTTL23  | 0.36 | 5.05E-05 | 1.92E-04 | Over-expressed |
| E2F6      | 0.36 | 5.39E-05 | 2.04E-04 | Over-expressed |
| STIP1     | 0.36 | 1.02E-04 | 3.58E-04 | Over-expressed |
| ZNF605    | 0.36 | 1.30E-04 | 4.42E-04 | Over-expressed |
| PMM2      | 0.36 | 1.33E-04 | 4.52E-04 | Over-expressed |
| ZNF544    | 0.36 | 2.27E-04 | 7.16E-04 | Over-expressed |
| FAM189B   | 0.36 | 3.67E-04 | 1.09E-03 | Over-expressed |
| NOP14-AS1 | 0.36 | 4.03E-04 | 1.18E-03 | Over-expressed |
| OGFR      | 0.36 | 4.14E-04 | 1.21E-03 | Over-expressed |
| PDCL3P4   | 0.36 | 4.26E-04 | 1.24E-03 | Over-expressed |
| SCAMP3    | 0.36 | 5.09E-04 | 1.45E-03 | Over-expressed |
| HEXD      | 0.36 | 5.62E-04 | 1.58E-03 | Over-expressed |
| NOC2L     | 0.36 | 5.90E-04 | 1.64E-03 | Over-expressed |
| NFKB2     | 0.36 | 6.16E-04 | 1.70E-03 | Over-expressed |
| CS        | 0.36 | 7.29E-04 | 1.98E-03 | Over-expressed |
| ZNF586    | 0.36 | 7.40E-04 | 2.01E-03 | Over-expressed |
| SRPRB     | 0.36 | 8.02E-04 | 2.15E-03 | Over-expressed |
| RUVBL1    | 0.36 | 8.84E-04 | 2.34E-03 | Over-expressed |
| TRMT12    | 0.36 | 9.48E-04 | 2.49E-03 | Over-expressed |
| TMEM201   | 0.36 | 1.00E-03 | 2.61E-03 | Over-expressed |
| GTPBP6    | 0.36 | 1.06E-03 | 2.73E-03 | Over-expressed |
| IQCC      | 0.36 | 1.35E-03 | 3.37E-03 | Over-expressed |
| ADPRM     | 0.36 | 2.24E-03 | 5.27E-03 | Over-expressed |
| SGSM2     | 0.36 | 2.33E-03 | 5.45E-03 | Over-expressed |
| ECE2      | 0.36 | 2.57E-03 | 5.95E-03 | Over-expressed |
| NECTIN2   | 0.36 | 4.78E-03 | 0.0102   | Over-expressed |
| ZNF419    | 0.36 | 8.27E-03 | 0.0166   | Over-expressed |
| HEXIM2    | 0.36 | 8.80E-03 | 0.0175   | Over-expressed |
| KPNA2     | 0.36 | 9.71E-03 | 0.019    | Over-expressed |
| CXCR4     | 0.36 | 0.0152   | 0.0282   | Over-expressed |
| LYL1      | 0.36 | 0.0155   | 0.0286   | Over-expressed |
| LIMK1     | 0.36 | 0.0217   | 0.0386   | Over-expressed |
| CACNB1    | 0.36 | 0.0268   | 0.0465   | Over-expressed |
| BMS1      | 0.35 | 6.20E-10 | 1.14E-08 | Over-expressed |
| SMARCAL1  | 0.35 | 5.94E-06 | 2.98E-05 | Over-expressed |
| CCT6A     | 0.35 | 6.88E-06 | 3.39E-05 | Over-expressed |
| FAM219B   | 0.35 | 1.22E-05 | 5.58E-05 | Over-expressed |
| NAGK      | 0.35 | 1.32E-05 | 5.99E-05 | Over-expressed |
| UBE2F     | 0.35 | 1.53E-05 | 6.77E-05 | Over-expressed |
| RNF25     | 0.35 | 2.75E-05 | 1.14E-04 | Over-expressed |
| OSTC      | 0.35 | 2.97E-05 | 1.21E-04 | Over-expressed |
| ENSA      | 0.35 | 6.33E-05 | 2.34E-04 | Over-expressed |
| ZSCAN2    | 0.35 | 6.87E-05 | 2.52E-04 | Over-expressed |
| BABAM1    | 0.35 | 8.30E-05 | 2.98E-04 | Over-expressed |
| TRMT2A    | 0.35 | 9.23E-05 | 3.27E-04 | Over-expressed |
| ZRSR2     | 0.35 | 1.17E-04 | 4.02E-04 | Over-expressed |
| ADRM1     | 0.35 | 1.22E-04 | 4.18E-04 | Over-expressed |
| NCLN      | 0.35 | 1.32E-04 | 4.46E-04 | Over-expressed |
| TADA3     | 0.35 | 1.35E-04 | 4.57E-04 | Over-expressed |
| ELOF1     | 0.35 | 1.70E-04 | 5.59E-04 | Over-expressed |

|           |      |          |          |                |
|-----------|------|----------|----------|----------------|
| UFD1      | 0.35 | 1.86E-04 | 6.05E-04 | Over-expressed |
| PLEKHA8P1 | 0.35 | 2.23E-04 | 7.05E-04 | Over-expressed |
| TUBD1     | 0.35 | 2.63E-04 | 8.14E-04 | Over-expressed |
| HMG2N1    | 0.35 | 3.74E-04 | 1.11E-03 | Over-expressed |
| TRMT6     | 0.35 | 3.88E-04 | 1.15E-03 | Over-expressed |
| PUM3      | 0.35 | 4.36E-04 | 1.27E-03 | Over-expressed |
| SAE1      | 0.35 | 4.42E-04 | 1.28E-03 | Over-expressed |
| CORO7     | 0.35 | 4.45E-04 | 1.29E-03 | Over-expressed |
| UBQLN4    | 0.35 | 4.89E-04 | 1.40E-03 | Over-expressed |
| PARK7     | 0.35 | 7.23E-04 | 1.96E-03 | Over-expressed |
| LMAN2     | 0.35 | 7.75E-04 | 2.09E-03 | Over-expressed |
| GTF2H5    | 0.35 | 8.15E-04 | 2.18E-03 | Over-expressed |
| TBC1D13   | 0.35 | 9.96E-04 | 2.59E-03 | Over-expressed |
| HMG2N3    | 0.35 | 1.16E-03 | 2.95E-03 | Over-expressed |
| UBE2V2    | 0.35 | 1.23E-03 | 3.12E-03 | Over-expressed |
| NDUFA6    | 0.35 | 1.24E-03 | 3.12E-03 | Over-expressed |
| TRPT1     | 0.35 | 1.33E-03 | 3.33E-03 | Over-expressed |
| HDAC2     | 0.35 | 1.35E-03 | 3.38E-03 | Over-expressed |
| P3H1      | 0.35 | 1.44E-03 | 3.57E-03 | Over-expressed |
| PTPN2     | 0.35 | 1.61E-03 | 3.94E-03 | Over-expressed |
| JADE2     | 0.35 | 2.22E-03 | 5.23E-03 | Over-expressed |
| CFAP36    | 0.35 | 2.26E-03 | 5.31E-03 | Over-expressed |
| ZDHHC24   | 0.35 | 3.27E-03 | 7.34E-03 | Over-expressed |
| GUSBP4    | 0.35 | 3.37E-03 | 7.53E-03 | Over-expressed |
| PLD6      | 0.35 | 3.46E-03 | 7.70E-03 | Over-expressed |
| DLEU1     | 0.35 | 3.75E-03 | 8.24E-03 | Over-expressed |
| HNRNPA1L2 | 0.35 | 5.43E-03 | 0.0114   | Over-expressed |
| RGS14     | 0.35 | 8.71E-03 | 0.0173   | Over-expressed |
| SERTAD1   | 0.35 | 0.0104   | 0.0202   | Over-expressed |
| TXNRD2    | 0.35 | 0.0138   | 0.0259   | Over-expressed |
| UBE2Q2    | 0.35 | 0.0193   | 0.0348   | Over-expressed |
| CENPX     | 0.35 | 0.0275   | 0.0476   | Over-expressed |
| PWP1      | 0.34 | 1.02E-08 | 1.25E-07 | Over-expressed |
| RBM10     | 0.34 | 2.05E-08 | 2.28E-07 | Over-expressed |
| GRPEL2    | 0.34 | 1.14E-06 | 7.13E-06 | Over-expressed |
| SRRT      | 0.34 | 1.80E-06 | 1.06E-05 | Over-expressed |
| DPY30     | 0.34 | 2.28E-06 | 1.29E-05 | Over-expressed |
| PANK2     | 0.34 | 4.56E-06 | 2.37E-05 | Over-expressed |
| RALA      | 0.34 | 5.09E-06 | 2.61E-05 | Over-expressed |
| STK25     | 0.34 | 5.99E-06 | 3.00E-05 | Over-expressed |
| FIZ1      | 0.34 | 6.00E-06 | 3.01E-05 | Over-expressed |
| PHB2      | 0.34 | 7.63E-06 | 3.71E-05 | Over-expressed |
| PYGO2     | 0.34 | 9.23E-06 | 4.38E-05 | Over-expressed |
| VPS16     | 0.34 | 1.26E-05 | 5.75E-05 | Over-expressed |
| COX7A2L   | 0.34 | 1.72E-05 | 7.51E-05 | Over-expressed |
| PFDN1     | 0.34 | 2.31E-05 | 9.71E-05 | Over-expressed |
| C11ORF68  | 0.34 | 2.52E-05 | 1.05E-04 | Over-expressed |
| DNAJC5    | 0.34 | 3.83E-05 | 1.51E-04 | Over-expressed |
| GGA1      | 0.34 | 7.41E-05 | 2.69E-04 | Over-expressed |
| ACTB      | 0.34 | 1.04E-04 | 3.62E-04 | Over-expressed |
| PPP1R7    | 0.34 | 1.25E-04 | 4.27E-04 | Over-expressed |
| COA1      | 0.34 | 1.28E-04 | 4.38E-04 | Over-expressed |
| LAMTOR1   | 0.34 | 1.37E-04 | 4.62E-04 | Over-expressed |
| FUS       | 0.34 | 1.40E-04 | 4.69E-04 | Over-expressed |
| TMEM126A  | 0.34 | 1.42E-04 | 4.76E-04 | Over-expressed |
| MCTS1     | 0.34 | 1.94E-04 | 6.29E-04 | Over-expressed |
| XAB2      | 0.34 | 1.98E-04 | 6.38E-04 | Over-expressed |

|          |      |          |          |                |
|----------|------|----------|----------|----------------|
| CYREN    | 0.34 | 2.04E-04 | 6.54E-04 | Over-expressed |
| OGFOD2   | 0.34 | 2.04E-04 | 6.55E-04 | Over-expressed |
| HSPD1    | 0.34 | 2.08E-04 | 6.64E-04 | Over-expressed |
| YKT6     | 0.34 | 2.43E-04 | 7.60E-04 | Over-expressed |
| RPUSD3   | 0.34 | 4.43E-04 | 1.28E-03 | Over-expressed |
| MAN1B1   | 0.34 | 4.75E-04 | 1.36E-03 | Over-expressed |
| ZNF707   | 0.34 | 6.03E-04 | 1.67E-03 | Over-expressed |
| EFHD2    | 0.34 | 6.19E-04 | 1.71E-03 | Over-expressed |
| SLC25A26 | 0.34 | 6.27E-04 | 1.73E-03 | Over-expressed |
| MRPS33   | 0.34 | 8.34E-04 | 2.23E-03 | Over-expressed |
| ZNF576   | 0.34 | 9.12E-04 | 2.40E-03 | Over-expressed |
| STARD3NL | 0.34 | 1.15E-03 | 2.93E-03 | Over-expressed |
| CAMK1    | 0.34 | 1.43E-03 | 3.55E-03 | Over-expressed |
| TMEM150A | 0.34 | 1.54E-03 | 3.78E-03 | Over-expressed |
| UROS     | 0.34 | 1.60E-03 | 3.92E-03 | Over-expressed |
| NAPB     | 0.34 | 2.93E-03 | 6.67E-03 | Over-expressed |
| MDH2     | 0.34 | 3.82E-03 | 8.39E-03 | Over-expressed |
| NUP93    | 0.34 | 4.00E-03 | 8.74E-03 | Over-expressed |
| MROH1    | 0.34 | 5.73E-03 | 0.012    | Over-expressed |
| PTRH1    | 0.34 | 9.82E-03 | 0.0192   | Over-expressed |
| FLJ42627 | 0.34 | 0.0137   | 0.0257   | Over-expressed |
| TNFSF12  | 0.34 | 0.0147   | 0.0273   | Over-expressed |
| XRCC4    | 0.34 | 0.021    | 0.0374   | Over-expressed |
| CCDC149  | 0.34 | 0.0223   | 0.0395   | Over-expressed |
| KSR1     | 0.34 | 0.0227   | 0.04     | Over-expressed |
| PILRA    | 0.34 | 0.0251   | 0.0438   | Over-expressed |
| DENR     | 0.33 | 2.42E-07 | 1.89E-06 | Over-expressed |
| DUSP28   | 0.33 | 6.19E-07 | 4.24E-06 | Over-expressed |
| LLPH     | 0.33 | 1.30E-06 | 7.95E-06 | Over-expressed |
| NGRN     | 0.33 | 2.51E-06 | 1.40E-05 | Over-expressed |
| RBMX     | 0.33 | 3.39E-06 | 1.82E-05 | Over-expressed |
| KCTD2    | 0.33 | 4.65E-06 | 2.41E-05 | Over-expressed |
| SYF2     | 0.33 | 5.26E-06 | 2.68E-05 | Over-expressed |
| GPN2     | 0.33 | 6.64E-06 | 3.28E-05 | Over-expressed |
| POLR3F   | 0.33 | 7.35E-06 | 3.59E-05 | Over-expressed |
| EFTUD2   | 0.33 | 7.35E-06 | 3.59E-05 | Over-expressed |
| NRF1     | 0.33 | 8.05E-06 | 3.88E-05 | Over-expressed |
| TMEM183A | 0.33 | 1.26E-05 | 5.75E-05 | Over-expressed |
| TIMM29   | 0.33 | 1.54E-05 | 6.83E-05 | Over-expressed |
| NVL      | 0.33 | 2.99E-05 | 1.22E-04 | Over-expressed |
| CWC27    | 0.33 | 3.39E-05 | 1.36E-04 | Over-expressed |
| NEURL4   | 0.33 | 3.88E-05 | 1.53E-04 | Over-expressed |
| LMBR1L   | 0.33 | 4.02E-05 | 1.58E-04 | Over-expressed |
| CENPB    | 0.33 | 5.16E-05 | 1.96E-04 | Over-expressed |
| GNG5     | 0.33 | 6.47E-05 | 2.39E-04 | Over-expressed |
| STN1     | 0.33 | 9.51E-05 | 3.35E-04 | Over-expressed |
| MOV10    | 0.33 | 1.55E-04 | 5.14E-04 | Over-expressed |
| HIF1AN   | 0.33 | 1.56E-04 | 5.16E-04 | Over-expressed |
| NOA1     | 0.33 | 1.81E-04 | 5.90E-04 | Over-expressed |
| TMEM203  | 0.33 | 2.69E-04 | 8.30E-04 | Over-expressed |
| LOC90784 | 0.33 | 4.38E-04 | 1.27E-03 | Over-expressed |
| ZNF34    | 0.33 | 4.63E-04 | 1.34E-03 | Over-expressed |
| RNF5     | 0.33 | 4.93E-04 | 1.41E-03 | Over-expressed |
| TTC1     | 0.33 | 4.99E-04 | 1.42E-03 | Over-expressed |
| SLC39A7  | 0.33 | 5.12E-04 | 1.46E-03 | Over-expressed |
| EPN2     | 0.33 | 6.71E-04 | 1.84E-03 | Over-expressed |
| MYCBP    | 0.33 | 6.77E-04 | 1.86E-03 | Over-expressed |

|              |      |          |          |                |
|--------------|------|----------|----------|----------------|
| PSMA5        | 0.33 | 7.42E-04 | 2.01E-03 | Over-expressed |
| CIAPIN1      | 0.33 | 7.86E-04 | 2.12E-03 | Over-expressed |
| MRPS11       | 0.33 | 8.12E-04 | 2.17E-03 | Over-expressed |
| SPIDR        | 0.33 | 1.16E-03 | 2.95E-03 | Over-expressed |
| CALM3        | 0.33 | 1.25E-03 | 3.16E-03 | Over-expressed |
| PTK2         | 0.33 | 1.34E-03 | 3.35E-03 | Over-expressed |
| CETN2        | 0.33 | 1.37E-03 | 3.41E-03 | Over-expressed |
| LIG1         | 0.33 | 1.78E-03 | 4.30E-03 | Over-expressed |
| ZNF517       | 0.33 | 1.81E-03 | 4.36E-03 | Over-expressed |
| C19ORF44     | 0.33 | 2.25E-03 | 5.30E-03 | Over-expressed |
| SLC25A11     | 0.33 | 2.68E-03 | 6.18E-03 | Over-expressed |
| YIF1A        | 0.33 | 3.48E-03 | 7.75E-03 | Over-expressed |
| MRPL4        | 0.33 | 4.22E-03 | 9.17E-03 | Over-expressed |
| RABEP2       | 0.33 | 4.56E-03 | 9.82E-03 | Over-expressed |
| BAG1         | 0.33 | 5.72E-03 | 0.012    | Over-expressed |
| UQCRFS1      | 0.33 | 5.90E-03 | 0.0123   | Over-expressed |
| FEN1         | 0.33 | 6.08E-03 | 0.0126   | Over-expressed |
| CD99         | 0.33 | 6.38E-03 | 0.0132   | Over-expressed |
| MRPS28       | 0.33 | 6.52E-03 | 0.0134   | Over-expressed |
| PRDX4        | 0.33 | 8.50E-03 | 0.017    | Over-expressed |
| PAK4         | 0.33 | 0.0102   | 0.0199   | Over-expressed |
| POMZP3       | 0.33 | 0.0105   | 0.0204   | Over-expressed |
| IRF2BP1      | 0.33 | 0.0106   | 0.0205   | Over-expressed |
| NT5DC3       | 0.33 | 0.0111   | 0.0214   | Over-expressed |
| RPA3         | 0.33 | 0.0111   | 0.0215   | Over-expressed |
| KIAA0753     | 0.33 | 0.021    | 0.0375   | Over-expressed |
| GMIP         | 0.33 | 0.0213   | 0.0379   | Over-expressed |
| FBXO24       | 0.33 | 0.0259   | 0.0451   | Over-expressed |
| TALDO1       | 0.33 | 0.0273   | 0.0473   | Over-expressed |
| AAAS         | 0.32 | 1.95E-06 | 1.13E-05 | Over-expressed |
| SUGP1        | 0.32 | 2.52E-06 | 1.41E-05 | Over-expressed |
| GS1-124K5.11 | 0.32 | 6.73E-06 | 3.32E-05 | Over-expressed |
| GLTP         | 0.32 | 8.01E-06 | 3.86E-05 | Over-expressed |
| RNF114       | 0.32 | 9.12E-06 | 4.34E-05 | Over-expressed |
| UBE2Z        | 0.32 | 1.09E-05 | 5.06E-05 | Over-expressed |
| RPN2         | 0.32 | 1.67E-05 | 7.35E-05 | Over-expressed |
| RNPS1        | 0.32 | 2.99E-05 | 1.22E-04 | Over-expressed |
| DPH5         | 0.32 | 3.97E-05 | 1.56E-04 | Over-expressed |
| FARSA        | 0.32 | 5.87E-05 | 2.20E-04 | Over-expressed |
| SKIV2L       | 0.32 | 7.63E-05 | 2.76E-04 | Over-expressed |
| NDUFA12      | 0.32 | 8.08E-05 | 2.91E-04 | Over-expressed |
| XPA          | 0.32 | 8.49E-05 | 3.04E-04 | Over-expressed |
| INTS11       | 0.32 | 8.89E-05 | 3.16E-04 | Over-expressed |
| SUMO1P3      | 0.32 | 1.17E-04 | 4.03E-04 | Over-expressed |
| DDA1         | 0.32 | 1.35E-04 | 4.57E-04 | Over-expressed |
| CXXC1        | 0.32 | 2.03E-04 | 6.51E-04 | Over-expressed |
| NELFB        | 0.32 | 2.38E-04 | 7.47E-04 | Over-expressed |
| ITPKC        | 0.32 | 2.41E-04 | 7.54E-04 | Over-expressed |
| CHMP1A       | 0.32 | 4.14E-04 | 1.21E-03 | Over-expressed |
| PSMC4        | 0.32 | 4.51E-04 | 1.31E-03 | Over-expressed |
| MRPS18B      | 0.32 | 4.75E-04 | 1.36E-03 | Over-expressed |
| TOMM34       | 0.32 | 5.80E-04 | 1.62E-03 | Over-expressed |
| YIPF2        | 0.32 | 7.09E-04 | 1.93E-03 | Over-expressed |
| MED31        | 0.32 | 7.45E-04 | 2.02E-03 | Over-expressed |
| PIN1         | 0.32 | 8.02E-04 | 2.15E-03 | Over-expressed |
| JPT2         | 0.32 | 8.07E-04 | 2.17E-03 | Over-expressed |
| MYL12B       | 0.32 | 9.07E-04 | 2.39E-03 | Over-expressed |



|            |      |          |          |                |
|------------|------|----------|----------|----------------|
| ATP5MC3    | 0.32 | 9.39E-04 | 2.47E-03 | Over-expressed |
| MED16      | 0.32 | 1.14E-03 | 2.92E-03 | Over-expressed |
| AP5Z1      | 0.32 | 1.41E-03 | 3.51E-03 | Over-expressed |
| FUCA2      | 0.32 | 1.45E-03 | 3.58E-03 | Over-expressed |
| RAB13      | 0.32 | 1.80E-03 | 4.33E-03 | Over-expressed |
| PBX2       | 0.32 | 1.93E-03 | 4.62E-03 | Over-expressed |
| NAGPA      | 0.32 | 2.04E-03 | 4.86E-03 | Over-expressed |
| TRAP1      | 0.32 | 2.16E-03 | 5.11E-03 | Over-expressed |
| ZDHHC12    | 0.32 | 2.48E-03 | 5.76E-03 | Over-expressed |
| ARRDC1-AS1 | 0.32 | 2.51E-03 | 5.83E-03 | Over-expressed |
| MRM1       | 0.32 | 3.02E-03 | 6.85E-03 | Over-expressed |
| C11ORF74   | 0.32 | 3.08E-03 | 6.96E-03 | Over-expressed |
| DKC1       | 0.32 | 3.64E-03 | 8.04E-03 | Over-expressed |
| COQ4       | 0.32 | 4.90E-03 | 0.0105   | Over-expressed |
| CINP       | 0.32 | 5.04E-03 | 0.0107   | Over-expressed |
| FBXL18     | 0.32 | 5.50E-03 | 0.0115   | Over-expressed |
| GLMP       | 0.32 | 6.45E-03 | 0.0133   | Over-expressed |
| PLEKHB2    | 0.32 | 7.34E-03 | 0.0149   | Over-expressed |
| LINC01089  | 0.32 | 7.84E-03 | 0.0158   | Over-expressed |
| NIPSNAP2   | 0.32 | 7.88E-03 | 0.0159   | Over-expressed |
| IFT43      | 0.32 | 9.87E-03 | 0.0193   | Over-expressed |
| PLXNB1     | 0.32 | 0.0101   | 0.0196   | Over-expressed |
| MAD2L2     | 0.32 | 0.0116   | 0.0222   | Over-expressed |
| YIF1B      | 0.32 | 0.012    | 0.023    | Over-expressed |
| ATG4D      | 0.32 | 0.0123   | 0.0233   | Over-expressed |
| NECAB3     | 0.32 | 0.0137   | 0.0257   | Over-expressed |
| PGPEP1     | 0.32 | 0.0139   | 0.026    | Over-expressed |
| MCM3       | 0.32 | 0.0141   | 0.0263   | Over-expressed |
| EZR        | 0.32 | 0.0156   | 0.0287   | Over-expressed |
| ZSCAN5A    | 0.32 | 0.0163   | 0.03     | Over-expressed |
| POLR3D     | 0.32 | 0.0184   | 0.0333   | Over-expressed |
| RNF145     | 0.32 | 0.0196   | 0.0352   | Over-expressed |
| GCNA       | 0.32 | 0.0205   | 0.0367   | Over-expressed |
| IFFO2      | 0.32 | 0.0217   | 0.0386   | Over-expressed |
| ANXA5      | 0.32 | 0.0243   | 0.0427   | Over-expressed |
| RBMS1      | 0.32 | 0.0281   | 0.0485   | Over-expressed |
| NAP1L4     | 0.31 | 1.52E-06 | 9.09E-06 | Over-expressed |
| ABCF1      | 0.31 | 6.28E-06 | 3.13E-05 | Over-expressed |
| CWC15      | 0.31 | 9.33E-06 | 4.42E-05 | Over-expressed |
| PRCC       | 0.31 | 2.30E-05 | 9.70E-05 | Over-expressed |
| PCGF1      | 0.31 | 4.11E-05 | 1.61E-04 | Over-expressed |
| CARM1      | 0.31 | 6.21E-05 | 2.31E-04 | Over-expressed |
| NUP85      | 0.31 | 6.55E-05 | 2.41E-04 | Over-expressed |
| ILK        | 0.31 | 7.13E-05 | 2.60E-04 | Over-expressed |
| RNPEPL1    | 0.31 | 7.44E-05 | 2.70E-04 | Over-expressed |
| ARFIP2     | 0.31 | 8.21E-05 | 2.95E-04 | Over-expressed |
| NSFL1C     | 0.31 | 1.14E-04 | 3.94E-04 | Over-expressed |
| PRKD2      | 0.31 | 1.16E-04 | 4.00E-04 | Over-expressed |
| CNOT10     | 0.31 | 1.27E-04 | 4.34E-04 | Over-expressed |
| PSMD8      | 0.31 | 2.56E-04 | 7.96E-04 | Over-expressed |
| USF2       | 0.31 | 3.70E-04 | 1.10E-03 | Over-expressed |
| THOC3      | 0.31 | 3.71E-04 | 1.10E-03 | Over-expressed |
| INO80E     | 0.31 | 4.39E-04 | 1.27E-03 | Over-expressed |
| CCDC9      | 0.31 | 4.58E-04 | 1.32E-03 | Over-expressed |
| PA2G4P4    | 0.31 | 5.04E-04 | 1.44E-03 | Over-expressed |
| HSPA4      | 0.31 | 5.39E-04 | 1.52E-03 | Over-expressed |
| TCP1       | 0.31 | 7.59E-04 | 2.05E-03 | Over-expressed |

|         |      |          |          |                |
|---------|------|----------|----------|----------------|
| PTPN6   | 0.31 | 9.94E-04 | 2.59E-03 | Over-expressed |
| USP22   | 0.31 | 1.11E-03 | 2.85E-03 | Over-expressed |
| FKBP8   | 0.31 | 1.42E-03 | 3.53E-03 | Over-expressed |
| RGL2    | 0.31 | 2.11E-03 | 5.01E-03 | Over-expressed |
| SLC3A2  | 0.31 | 2.48E-03 | 5.76E-03 | Over-expressed |
| TMUB1   | 0.31 | 2.64E-03 | 6.10E-03 | Over-expressed |
| LRRC27  | 0.31 | 3.41E-03 | 7.62E-03 | Over-expressed |
| CDK2AP2 | 0.31 | 3.45E-03 | 7.69E-03 | Over-expressed |
| UNC93B1 | 0.31 | 4.62E-03 | 9.94E-03 | Over-expressed |
| TIPIN   | 0.31 | 4.75E-03 | 0.0102   | Over-expressed |
| SNAPC4  | 0.31 | 4.85E-03 | 0.0104   | Over-expressed |
| RBFA    | 0.31 | 4.97E-03 | 0.0106   | Over-expressed |
| IDH3G   | 0.31 | 5.09E-03 | 0.0108   | Over-expressed |
| EMC10   | 0.31 | 5.18E-03 | 0.011    | Over-expressed |
| CNOT6   | 0.31 | 6.06E-03 | 0.0126   | Over-expressed |
| NTPCR   | 0.31 | 6.26E-03 | 0.0129   | Over-expressed |
| MPG     | 0.31 | 6.94E-03 | 0.0142   | Over-expressed |
| MZT1    | 0.31 | 7.08E-03 | 0.0144   | Over-expressed |
| TLE5    | 0.31 | 7.48E-03 | 0.0151   | Over-expressed |
| TRADD   | 0.31 | 7.94E-03 | 0.016    | Over-expressed |
| CDKN2D  | 0.31 | 8.08E-03 | 0.0162   | Over-expressed |
| RHNO1   | 0.31 | 8.15E-03 | 0.0163   | Over-expressed |
| COMMD1  | 0.31 | 9.11E-03 | 0.018    | Over-expressed |
| SMARCA4 | 0.31 | 9.12E-03 | 0.018    | Over-expressed |
| ABHD17A | 0.31 | 9.36E-03 | 0.0184   | Over-expressed |
| BORCS5  | 0.31 | 0.01     | 0.0196   | Over-expressed |
| FBXL19  | 0.31 | 0.0107   | 0.0207   | Over-expressed |
| ZNF226  | 0.31 | 0.0128   | 0.0242   | Over-expressed |
| YPEL3   | 0.31 | 0.0129   | 0.0243   | Over-expressed |
| AMDHD2  | 0.31 | 0.0136   | 0.0256   | Over-expressed |
| FAM86JP | 0.31 | 0.0188   | 0.0339   | Over-expressed |
| MCMDC2  | 0.31 | 0.0205   | 0.0367   | Over-expressed |
| SDC3    | 0.31 | 0.0215   | 0.0381   | Over-expressed |
| TUFT1   | 0.31 | 0.0241   | 0.0423   | Over-expressed |
| ZNF771  | 0.31 | 0.025    | 0.0436   | Over-expressed |
| PMVK    | 0.31 | 0.0288   | 0.0496   | Over-expressed |
| EIF1AD  | 0.3  | 9.43E-07 | 6.07E-06 | Over-expressed |
| HDGF    | 0.3  | 5.35E-06 | 2.72E-05 | Over-expressed |
| PTPMT1  | 0.3  | 7.55E-06 | 3.68E-05 | Over-expressed |
| RBM17   | 0.3  | 1.96E-05 | 8.42E-05 | Over-expressed |
| EXOSC9  | 0.3  | 2.63E-05 | 1.09E-04 | Over-expressed |
| TUBGCP2 | 0.3  | 3.07E-05 | 1.25E-04 | Over-expressed |
| UTP14A  | 0.3  | 3.74E-05 | 1.48E-04 | Over-expressed |
| ERAL1   | 0.3  | 7.64E-05 | 2.77E-04 | Over-expressed |
| DDX41   | 0.3  | 8.00E-05 | 2.89E-04 | Over-expressed |
| SF3A3   | 0.3  | 8.69E-05 | 3.10E-04 | Over-expressed |
| YARS2   | 0.3  | 8.94E-05 | 3.18E-04 | Over-expressed |
| WDR75   | 0.3  | 1.06E-04 | 3.68E-04 | Over-expressed |
| ZNF346  | 0.3  | 1.37E-04 | 4.61E-04 | Over-expressed |
| PHF1    | 0.3  | 2.01E-04 | 6.48E-04 | Over-expressed |
| ELAC2   | 0.3  | 2.04E-04 | 6.54E-04 | Over-expressed |
| COASY   | 0.3  | 2.20E-04 | 6.97E-04 | Over-expressed |
| SUMO3   | 0.3  | 2.68E-04 | 8.27E-04 | Over-expressed |
| ANKLE2  | 0.3  | 3.38E-04 | 1.02E-03 | Over-expressed |
| FAM193B | 0.3  | 3.54E-04 | 1.06E-03 | Over-expressed |
| TAF7    | 0.3  | 8.19E-04 | 2.19E-03 | Over-expressed |
| NCOA5   | 0.3  | 1.08E-03 | 2.79E-03 | Over-expressed |

|          |      |          |          |                |
|----------|------|----------|----------|----------------|
| PRMT7    | 0.3  | 1.17E-03 | 2.98E-03 | Over-expressed |
| ANKRD54  | 0.3  | 1.21E-03 | 3.06E-03 | Over-expressed |
| NHEJ1    | 0.3  | 1.30E-03 | 3.27E-03 | Over-expressed |
| POLR2J4  | 0.3  | 1.38E-03 | 3.44E-03 | Over-expressed |
| HNRNPA0  | 0.3  | 1.52E-03 | 3.75E-03 | Over-expressed |
| TSEN2    | 0.3  | 1.63E-03 | 3.97E-03 | Over-expressed |
| AVEN     | 0.3  | 2.43E-03 | 5.66E-03 | Over-expressed |
| FOXP1    | 0.3  | 2.75E-03 | 6.31E-03 | Over-expressed |
| LGALS1   | 0.3  | 3.95E-03 | 8.65E-03 | Over-expressed |
| FANCL    | 0.3  | 4.15E-03 | 9.03E-03 | Over-expressed |
| MTIF3    | 0.3  | 4.25E-03 | 9.22E-03 | Over-expressed |
| SNX8     | 0.3  | 4.36E-03 | 9.43E-03 | Over-expressed |
| DUS3L    | 0.3  | 4.38E-03 | 9.48E-03 | Over-expressed |
| IPO5     | 0.3  | 4.69E-03 | 0.0101   | Over-expressed |
| ZNF629   | 0.3  | 4.94E-03 | 0.0105   | Over-expressed |
| PIDD1    | 0.3  | 5.03E-03 | 0.0107   | Over-expressed |
| PIN4P1   | 0.3  | 5.06E-03 | 0.0107   | Over-expressed |
| AGBL5    | 0.3  | 6.52E-03 | 0.0134   | Over-expressed |
| SMARCB1  | 0.3  | 7.24E-03 | 0.0147   | Over-expressed |
| ORAI1    | 0.3  | 8.52E-03 | 0.017    | Over-expressed |
| BID      | 0.3  | 8.53E-03 | 0.017    | Over-expressed |
| SPATS2   | 0.3  | 0.0106   | 0.0206   | Over-expressed |
| DMWD     | 0.3  | 0.0109   | 0.021    | Over-expressed |
| ALDH16A1 | 0.3  | 0.0135   | 0.0254   | Over-expressed |
| SIRT4    | 0.3  | 0.0167   | 0.0305   | Over-expressed |
| COMT     | 0.3  | 0.0192   | 0.0346   | Over-expressed |
| SLC10A3  | 0.3  | 0.02     | 0.0358   | Over-expressed |
| PON2     | 0.3  | 0.0224   | 0.0397   | Over-expressed |
| ADO      | 0.29 | 1.22E-05 | 5.59E-05 | Over-expressed |
| HNRNPA3  | 0.29 | 1.45E-05 | 6.49E-05 | Over-expressed |
| MRPL10   | 0.29 | 2.91E-05 | 1.19E-04 | Over-expressed |
| C12ORF65 | 0.29 | 2.99E-05 | 1.22E-04 | Over-expressed |
| COMMD9   | 0.29 | 4.33E-05 | 1.69E-04 | Over-expressed |
| HNRNPM   | 0.29 | 5.91E-05 | 2.21E-04 | Over-expressed |
| OXA1L    | 0.29 | 8.00E-05 | 2.89E-04 | Over-expressed |
| ASB6     | 0.29 | 1.05E-04 | 3.65E-04 | Over-expressed |
| THAP11   | 0.29 | 1.30E-04 | 4.42E-04 | Over-expressed |
| VDAC1    | 0.29 | 1.52E-04 | 5.06E-04 | Over-expressed |
| CDC123   | 0.29 | 1.90E-04 | 6.18E-04 | Over-expressed |
| TBC1D10B | 0.29 | 2.18E-04 | 6.91E-04 | Over-expressed |
| BTF3L4   | 0.29 | 2.44E-04 | 7.63E-04 | Over-expressed |
| KAT14    | 0.29 | 3.50E-04 | 1.05E-03 | Over-expressed |
| RCCD1    | 0.29 | 3.58E-04 | 1.07E-03 | Over-expressed |
| NELFCD   | 0.29 | 3.72E-04 | 1.11E-03 | Over-expressed |
| NCBP2    | 0.29 | 4.27E-04 | 1.24E-03 | Over-expressed |
| MNAT1    | 0.29 | 4.64E-04 | 1.34E-03 | Over-expressed |
| GEMIN8   | 0.29 | 4.65E-04 | 1.34E-03 | Over-expressed |
| PAGR1    | 0.29 | 4.77E-04 | 1.37E-03 | Over-expressed |
| ATP6AP1  | 0.29 | 6.78E-04 | 1.86E-03 | Over-expressed |
| SSU72    | 0.29 | 6.85E-04 | 1.87E-03 | Over-expressed |
| FIBP     | 0.29 | 8.62E-04 | 2.29E-03 | Over-expressed |
| NCL      | 0.29 | 9.31E-04 | 2.45E-03 | Over-expressed |
| EMC8     | 0.29 | 9.65E-04 | 2.52E-03 | Over-expressed |
| TMEM179B | 0.29 | 9.81E-04 | 2.56E-03 | Over-expressed |
| TAF9     | 0.29 | 1.00E-03 | 2.61E-03 | Over-expressed |
| ATP6V0C  | 0.29 | 1.13E-03 | 2.89E-03 | Over-expressed |
| SEPTIN9  | 0.29 | 1.19E-03 | 3.02E-03 | Over-expressed |

|           |      |          |          |                |
|-----------|------|----------|----------|----------------|
| MRPL37    | 0.29 | 1.27E-03 | 3.20E-03 | Over-expressed |
| ZNF668    | 0.29 | 1.48E-03 | 3.65E-03 | Over-expressed |
| SNAPC2    | 0.29 | 1.61E-03 | 3.93E-03 | Over-expressed |
| GTPBP4    | 0.29 | 1.63E-03 | 3.98E-03 | Over-expressed |
| TAMM41    | 0.29 | 1.65E-03 | 4.02E-03 | Over-expressed |
| THOC1     | 0.29 | 1.71E-03 | 4.16E-03 | Over-expressed |
| EBNA1BP2  | 0.29 | 1.83E-03 | 4.40E-03 | Over-expressed |
| CYBC1     | 0.29 | 1.89E-03 | 4.52E-03 | Over-expressed |
| SNRNP40   | 0.29 | 2.47E-03 | 5.74E-03 | Over-expressed |
| FASTK     | 0.29 | 2.58E-03 | 5.98E-03 | Over-expressed |
| NPRL2     | 0.29 | 2.67E-03 | 6.15E-03 | Over-expressed |
| TXN2      | 0.29 | 2.67E-03 | 6.16E-03 | Over-expressed |
| COX16     | 0.29 | 2.74E-03 | 6.29E-03 | Over-expressed |
| GNB2      | 0.29 | 2.77E-03 | 6.35E-03 | Over-expressed |
| PSMG1     | 0.29 | 2.77E-03 | 6.37E-03 | Over-expressed |
| TSR1      | 0.29 | 3.67E-03 | 8.10E-03 | Over-expressed |
| STK3      | 0.29 | 3.98E-03 | 8.70E-03 | Over-expressed |
| INO80B    | 0.29 | 4.03E-03 | 8.79E-03 | Over-expressed |
| CHMP6     | 0.29 | 4.92E-03 | 0.0105   | Over-expressed |
| CROCC     | 0.29 | 4.92E-03 | 0.0105   | Over-expressed |
| TBC1D22B  | 0.29 | 5.36E-03 | 0.0113   | Over-expressed |
| CMSS1     | 0.29 | 5.37E-03 | 0.0113   | Over-expressed |
| LINC00847 | 0.29 | 6.95E-03 | 0.0142   | Over-expressed |
| ATXN7L2   | 0.29 | 9.42E-03 | 0.0185   | Over-expressed |
| LOC150776 | 0.29 | 9.53E-03 | 0.0187   | Over-expressed |
| TMEM81    | 0.29 | 0.0106   | 0.0206   | Over-expressed |
| H1FX      | 0.29 | 0.0108   | 0.0209   | Over-expressed |
| POLR3K    | 0.29 | 0.0111   | 0.0214   | Over-expressed |
| SRA1      | 0.29 | 0.0122   | 0.0233   | Over-expressed |
| PMPCA     | 0.29 | 0.0132   | 0.0249   | Over-expressed |
| PTCHD3P1  | 0.29 | 0.0137   | 0.0257   | Over-expressed |
| COX7B     | 0.29 | 0.0177   | 0.0321   | Over-expressed |
| RPP40     | 0.29 | 0.0288   | 0.0496   | Over-expressed |
| EIF2B5    | 0.28 | 4.56E-07 | 3.26E-06 | Over-expressed |
| RPP38     | 0.28 | 1.22E-06 | 7.55E-06 | Over-expressed |
| SRP14     | 0.28 | 4.15E-06 | 2.19E-05 | Over-expressed |
| PTGES3    | 0.28 | 1.13E-05 | 5.22E-05 | Over-expressed |
| DDX39B    | 0.28 | 5.11E-05 | 1.94E-04 | Over-expressed |
| MAD2L1BP  | 0.28 | 5.14E-05 | 1.96E-04 | Over-expressed |
| CHCHD4    | 0.28 | 6.29E-05 | 2.33E-04 | Over-expressed |
| GCN1      | 0.28 | 7.11E-05 | 2.60E-04 | Over-expressed |
| DDX47     | 0.28 | 9.45E-05 | 3.34E-04 | Over-expressed |
| CBWD2     | 0.28 | 2.26E-04 | 7.15E-04 | Over-expressed |
| YAE1      | 0.28 | 3.63E-04 | 1.08E-03 | Over-expressed |
| IP6K2     | 0.28 | 4.20E-04 | 1.23E-03 | Over-expressed |
| AGPAT1    | 0.28 | 5.03E-04 | 1.43E-03 | Over-expressed |
| ARAP1     | 0.28 | 5.32E-04 | 1.51E-03 | Over-expressed |
| MRPS18C   | 0.28 | 5.82E-04 | 1.62E-03 | Over-expressed |
| RNF166    | 0.28 | 8.56E-04 | 2.28E-03 | Over-expressed |
| SET       | 0.28 | 9.59E-04 | 2.51E-03 | Over-expressed |
| ZNF473    | 0.28 | 9.62E-04 | 2.52E-03 | Over-expressed |
| MARS      | 0.28 | 1.05E-03 | 2.72E-03 | Over-expressed |
| ZNF691    | 0.28 | 1.09E-03 | 2.79E-03 | Over-expressed |
| STX5      | 0.28 | 1.15E-03 | 2.93E-03 | Over-expressed |
| BABAM2    | 0.28 | 1.21E-03 | 3.07E-03 | Over-expressed |
| HSPB11    | 0.28 | 1.31E-03 | 3.30E-03 | Over-expressed |
| SMARCD1   | 0.28 | 1.71E-03 | 4.15E-03 | Over-expressed |

|          |      |          |          |                |
|----------|------|----------|----------|----------------|
| FAM53B   | 0.28 | 2.21E-03 | 5.23E-03 | Over-expressed |
| URI1     | 0.28 | 2.41E-03 | 5.62E-03 | Over-expressed |
| ZBTB45   | 0.28 | 2.59E-03 | 6.00E-03 | Over-expressed |
| SCAMP4   | 0.28 | 3.38E-03 | 7.55E-03 | Over-expressed |
| TAZ      | 0.28 | 3.87E-03 | 8.48E-03 | Over-expressed |
| CIRBP    | 0.28 | 4.38E-03 | 9.48E-03 | Over-expressed |
| LSM10    | 0.28 | 5.47E-03 | 0.0115   | Over-expressed |
| ECSIT    | 0.28 | 6.08E-03 | 0.0126   | Over-expressed |
| JUP      | 0.28 | 7.52E-03 | 0.0152   | Over-expressed |
| RWDD2A   | 0.28 | 8.02E-03 | 0.0161   | Over-expressed |
| SPOUT1   | 0.28 | 8.34E-03 | 0.0167   | Over-expressed |
| C16ORF91 | 0.28 | 0.0106   | 0.0205   | Over-expressed |
| IKBIP    | 0.28 | 0.0113   | 0.0217   | Over-expressed |
| SPIN2B   | 0.28 | 0.0114   | 0.0218   | Over-expressed |
| PRDX2    | 0.28 | 0.0123   | 0.0234   | Over-expressed |
| PHF21A   | 0.28 | 0.0125   | 0.0237   | Over-expressed |
| NDUFA4   | 0.28 | 0.0153   | 0.0283   | Over-expressed |
| FOXK1    | 0.28 | 0.0184   | 0.0333   | Over-expressed |
| UCHL3    | 0.28 | 0.0191   | 0.0344   | Over-expressed |
| ATP6V1C2 | 0.28 | 0.0214   | 0.0381   | Over-expressed |
| HEBP2    | 0.28 | 0.0239   | 0.0421   | Over-expressed |
| HNRNPD   | 0.27 | 2.89E-05 | 1.18E-04 | Over-expressed |
| GSK3A    | 0.27 | 6.71E-05 | 2.46E-04 | Over-expressed |
| PRPF19   | 0.27 | 8.02E-05 | 2.89E-04 | Over-expressed |
| NDUFB4   | 0.27 | 9.77E-05 | 3.44E-04 | Over-expressed |
| NECAP2   | 0.27 | 1.11E-04 | 3.84E-04 | Over-expressed |
| SUPT4H1  | 0.27 | 1.26E-04 | 4.30E-04 | Over-expressed |
| RUFY1    | 0.27 | 2.34E-04 | 7.35E-04 | Over-expressed |
| MAGOH    | 0.27 | 2.51E-04 | 7.82E-04 | Over-expressed |
| MTCH1    | 0.27 | 2.52E-04 | 7.85E-04 | Over-expressed |
| YIPF3    | 0.27 | 2.63E-04 | 8.14E-04 | Over-expressed |
| APEX1    | 0.27 | 2.86E-04 | 8.76E-04 | Over-expressed |
| MFF      | 0.27 | 3.93E-04 | 1.16E-03 | Over-expressed |
| ARPC2    | 0.27 | 4.30E-04 | 1.25E-03 | Over-expressed |
| H2AFY    | 0.27 | 4.46E-04 | 1.29E-03 | Over-expressed |
| LMAN2L   | 0.27 | 5.09E-04 | 1.45E-03 | Over-expressed |
| MRPS14   | 0.27 | 6.85E-04 | 1.87E-03 | Over-expressed |
| EXOC3    | 0.27 | 7.84E-04 | 2.11E-03 | Over-expressed |
| CCDC97   | 0.27 | 8.75E-04 | 2.32E-03 | Over-expressed |
| STARD3   | 0.27 | 9.33E-04 | 2.45E-03 | Over-expressed |
| CEP95    | 0.27 | 1.10E-03 | 2.83E-03 | Over-expressed |
| DEF8     | 0.27 | 1.25E-03 | 3.16E-03 | Over-expressed |
| BRAT1    | 0.27 | 1.58E-03 | 3.88E-03 | Over-expressed |
| ZSWIM3   | 0.27 | 2.17E-03 | 5.13E-03 | Over-expressed |
| TOE1     | 0.27 | 2.22E-03 | 5.24E-03 | Over-expressed |
| POLR3H   | 0.27 | 2.26E-03 | 5.32E-03 | Over-expressed |
| CFAP298  | 0.27 | 2.88E-03 | 6.57E-03 | Over-expressed |
| SLC39A1  | 0.27 | 3.00E-03 | 6.81E-03 | Over-expressed |
| STX10    | 0.27 | 3.05E-03 | 6.91E-03 | Over-expressed |
| HHEX     | 0.27 | 3.09E-03 | 6.99E-03 | Over-expressed |
| CIZ1     | 0.27 | 3.24E-03 | 7.29E-03 | Over-expressed |
| ZNF205   | 0.27 | 4.47E-03 | 9.65E-03 | Over-expressed |
| METTL22  | 0.27 | 4.65E-03 | 9.99E-03 | Over-expressed |
| RTN4IP1  | 0.27 | 4.87E-03 | 0.0104   | Over-expressed |
| DSN1     | 0.27 | 4.93E-03 | 0.0105   | Over-expressed |
| ABCC5    | 0.27 | 6.32E-03 | 0.0131   | Over-expressed |
| POP1     | 0.27 | 7.67E-03 | 0.0155   | Over-expressed |

|          |      |          |          |                |
|----------|------|----------|----------|----------------|
| HAUS5    | 0.27 | 8.36E-03 | 0.0167   | Over-expressed |
| UCK1     | 0.27 | 8.84E-03 | 0.0175   | Over-expressed |
| MTERF3   | 0.27 | 9.03E-03 | 0.0179   | Over-expressed |
| KBTBD3   | 0.27 | 9.20E-03 | 0.0182   | Over-expressed |
| COX10    | 0.27 | 9.48E-03 | 0.0186   | Over-expressed |
| NEK6     | 0.27 | 0.011    | 0.0212   | Over-expressed |
| CSNK2A1  | 0.27 | 0.011    | 0.0212   | Over-expressed |
| TNIP1    | 0.27 | 0.0114   | 0.0219   | Over-expressed |
| SLC20A1  | 0.27 | 0.0122   | 0.0232   | Over-expressed |
| IPO4     | 0.27 | 0.0141   | 0.0264   | Over-expressed |
| TOMM40L  | 0.27 | 0.0177   | 0.0321   | Over-expressed |
| POLR1E   | 0.27 | 0.018    | 0.0327   | Over-expressed |
| NASP     | 0.27 | 0.0181   | 0.0328   | Over-expressed |
| CSNK1E   | 0.27 | 0.0184   | 0.0333   | Over-expressed |
| ZNF8     | 0.27 | 0.0195   | 0.0351   | Over-expressed |
| CCDC130  | 0.27 | 0.02     | 0.0358   | Over-expressed |
| CD27-AS1 | 0.27 | 0.0201   | 0.036    | Over-expressed |
| MSTO1    | 0.27 | 0.0205   | 0.0366   | Over-expressed |
| DHRS7B   | 0.27 | 0.0222   | 0.0393   | Over-expressed |
| CAMKMT   | 0.27 | 0.025    | 0.0437   | Over-expressed |
| PNP      | 0.27 | 0.027    | 0.0468   | Over-expressed |
| GPI      | 0.27 | 0.0277   | 0.048    | Over-expressed |
| ACTR1A   | 0.26 | 4.81E-06 | 2.48E-05 | Over-expressed |
| FAM204A  | 0.26 | 5.95E-06 | 2.99E-05 | Over-expressed |
| HINFP    | 0.26 | 4.75E-05 | 1.83E-04 | Over-expressed |
| HARS2    | 0.26 | 1.38E-04 | 4.66E-04 | Over-expressed |
| TRIT1    | 0.26 | 1.39E-04 | 4.66E-04 | Over-expressed |
| TMEM115  | 0.26 | 1.69E-04 | 5.55E-04 | Over-expressed |
| IER3IP1  | 0.26 | 2.49E-04 | 7.76E-04 | Over-expressed |
| SMPD4    | 0.26 | 2.56E-04 | 7.96E-04 | Over-expressed |
| HPS6     | 0.26 | 2.77E-04 | 8.53E-04 | Over-expressed |
| GOLGA3   | 0.26 | 3.12E-04 | 9.48E-04 | Over-expressed |
| ABT1     | 0.26 | 3.81E-04 | 1.13E-03 | Over-expressed |
| SRF      | 0.26 | 6.23E-04 | 1.72E-03 | Over-expressed |
| RAB11A   | 0.26 | 7.04E-04 | 1.92E-03 | Over-expressed |
| PGAM1    | 0.26 | 9.17E-04 | 2.42E-03 | Over-expressed |
| TMEM199  | 0.26 | 9.23E-04 | 2.43E-03 | Over-expressed |
| PNPLA6   | 0.26 | 9.61E-04 | 2.52E-03 | Over-expressed |
| NSMCE4A  | 0.26 | 1.05E-03 | 2.71E-03 | Over-expressed |
| EDEM2    | 0.26 | 1.06E-03 | 2.73E-03 | Over-expressed |
| SRP19    | 0.26 | 1.10E-03 | 2.82E-03 | Over-expressed |
| TBL2     | 0.26 | 1.18E-03 | 2.99E-03 | Over-expressed |
| SGTA     | 0.26 | 1.18E-03 | 3.00E-03 | Over-expressed |
| RAD23A   | 0.26 | 1.23E-03 | 3.10E-03 | Over-expressed |
| TRIAP1   | 0.26 | 1.34E-03 | 3.35E-03 | Over-expressed |
| ERH      | 0.26 | 1.35E-03 | 3.38E-03 | Over-expressed |
| DRAM2    | 0.26 | 1.41E-03 | 3.51E-03 | Over-expressed |
| CCDC22   | 0.26 | 1.81E-03 | 4.37E-03 | Over-expressed |
| ILF3     | 0.26 | 1.85E-03 | 4.44E-03 | Over-expressed |
| TMEM41A  | 0.26 | 2.07E-03 | 4.90E-03 | Over-expressed |
| DHPS     | 0.26 | 2.28E-03 | 5.35E-03 | Over-expressed |
| CCT8     | 0.26 | 2.60E-03 | 6.01E-03 | Over-expressed |
| ZMAT2    | 0.26 | 2.92E-03 | 6.64E-03 | Over-expressed |
| NDUFAF3  | 0.26 | 3.10E-03 | 7.01E-03 | Over-expressed |
| NOLC1    | 0.26 | 3.37E-03 | 7.55E-03 | Over-expressed |
| MED28    | 0.26 | 3.52E-03 | 7.83E-03 | Over-expressed |
| SH3GL1   | 0.26 | 3.68E-03 | 8.12E-03 | Over-expressed |

|          |      |          |          |                |
|----------|------|----------|----------|----------------|
| ZNF250   | 0.26 | 3.80E-03 | 8.34E-03 | Over-expressed |
| RETREG3  | 0.26 | 4.83E-03 | 0.0103   | Over-expressed |
| LTBR     | 0.26 | 4.86E-03 | 0.0104   | Over-expressed |
| FAM222B  | 0.26 | 5.92E-03 | 0.0123   | Over-expressed |
| MRPL58   | 0.26 | 6.15E-03 | 0.0128   | Over-expressed |
| WDR12    | 0.26 | 6.34E-03 | 0.0131   | Over-expressed |
| BIN3     | 0.26 | 7.54E-03 | 0.0153   | Over-expressed |
| ZBTB48   | 0.26 | 8.27E-03 | 0.0166   | Over-expressed |
| ARRDC1   | 0.26 | 8.42E-03 | 0.0168   | Over-expressed |
| TEX10    | 0.26 | 0.0108   | 0.0209   | Over-expressed |
| FBRSL1   | 0.26 | 0.0112   | 0.0215   | Over-expressed |
| SMN2     | 0.26 | 0.0125   | 0.0237   | Over-expressed |
| CYB561D2 | 0.26 | 0.0134   | 0.0253   | Over-expressed |
| NDUFV1   | 0.26 | 0.0136   | 0.0256   | Over-expressed |
| TRAM1    | 0.26 | 0.0147   | 0.0273   | Over-expressed |
| FAM98C   | 0.26 | 0.0148   | 0.0275   | Over-expressed |
| NFKBIB   | 0.26 | 0.0189   | 0.0341   | Over-expressed |
| NR1H3    | 0.26 | 0.0195   | 0.035    | Over-expressed |
| SRD5A3   | 0.26 | 0.0196   | 0.0352   | Over-expressed |
| SRPK1    | 0.26 | 0.0197   | 0.0353   | Over-expressed |
| ZNF74    | 0.26 | 0.0208   | 0.0372   | Over-expressed |
| DBI      | 0.26 | 0.0212   | 0.0377   | Over-expressed |
| MAGED2   | 0.26 | 0.0223   | 0.0395   | Over-expressed |
| ILF3-DT  | 0.26 | 0.0254   | 0.0443   | Over-expressed |
| CD83     | 0.26 | 0.0258   | 0.0449   | Over-expressed |
| SCMH1    | 0.26 | 0.0284   | 0.049    | Over-expressed |
| VRK1     | 0.26 | 0.0288   | 0.0495   | Over-expressed |
| SAR1A    | 0.25 | 9.57E-06 | 4.53E-05 | Over-expressed |
| ATG13    | 0.25 | 1.13E-05 | 5.22E-05 | Over-expressed |
| EDC3     | 0.25 | 2.19E-05 | 9.27E-05 | Over-expressed |
| OTUD5    | 0.25 | 5.56E-05 | 2.10E-04 | Over-expressed |
| BAG6     | 0.25 | 7.04E-05 | 2.57E-04 | Over-expressed |
| EWSR1    | 0.25 | 1.13E-04 | 3.91E-04 | Over-expressed |
| GPN1     | 0.25 | 1.94E-04 | 6.28E-04 | Over-expressed |
| CENPT    | 0.25 | 2.09E-04 | 6.67E-04 | Over-expressed |
| COP1     | 0.25 | 2.73E-04 | 8.42E-04 | Over-expressed |
| TAF11    | 0.25 | 2.86E-04 | 8.75E-04 | Over-expressed |
| LARS     | 0.25 | 3.10E-04 | 9.41E-04 | Over-expressed |
| R3HCC1L  | 0.25 | 3.56E-04 | 1.06E-03 | Over-expressed |
| ELOVL1   | 0.25 | 3.60E-04 | 1.07E-03 | Over-expressed |
| MED8     | 0.25 | 8.95E-04 | 2.36E-03 | Over-expressed |
| SFPQ     | 0.25 | 9.64E-04 | 2.52E-03 | Over-expressed |
| ZNF271P  | 0.25 | 9.73E-04 | 2.54E-03 | Over-expressed |
| TMEM14C  | 0.25 | 9.73E-04 | 2.54E-03 | Over-expressed |
| CALM2    | 0.25 | 1.08E-03 | 2.78E-03 | Over-expressed |
| MRPS35   | 0.25 | 1.15E-03 | 2.94E-03 | Over-expressed |
| KMT5A    | 0.25 | 1.24E-03 | 3.13E-03 | Over-expressed |
| TRAPPC12 | 0.25 | 1.28E-03 | 3.22E-03 | Over-expressed |
| ATP6V1E1 | 0.25 | 1.35E-03 | 3.37E-03 | Over-expressed |
| PYCR2    | 0.25 | 1.40E-03 | 3.48E-03 | Over-expressed |
| SEC13    | 0.25 | 1.59E-03 | 3.90E-03 | Over-expressed |
| CLN6     | 0.25 | 1.63E-03 | 3.97E-03 | Over-expressed |
| UTP18    | 0.25 | 1.68E-03 | 4.08E-03 | Over-expressed |
| TMEM222  | 0.25 | 1.93E-03 | 4.62E-03 | Over-expressed |
| SFT2D3   | 0.25 | 1.95E-03 | 4.66E-03 | Over-expressed |
| ZBTB9    | 0.25 | 2.02E-03 | 4.81E-03 | Over-expressed |
| PHC2     | 0.25 | 2.17E-03 | 5.13E-03 | Over-expressed |

|         |      |          |          |                |
|---------|------|----------|----------|----------------|
| TMEM250 | 0.25 | 2.28E-03 | 5.35E-03 | Over-expressed |
| COG2    | 0.25 | 2.94E-03 | 6.69E-03 | Over-expressed |
| DDX50   | 0.25 | 3.14E-03 | 7.09E-03 | Over-expressed |
| ERGIC2  | 0.25 | 3.88E-03 | 8.51E-03 | Over-expressed |
| RPUSD4  | 0.25 | 4.17E-03 | 9.07E-03 | Over-expressed |
| E2F4    | 0.25 | 4.42E-03 | 9.55E-03 | Over-expressed |
| YJU2    | 0.25 | 5.01E-03 | 0.0106   | Over-expressed |
| PISD    | 0.25 | 5.50E-03 | 0.0115   | Over-expressed |
| PHF5A   | 0.25 | 5.68E-03 | 0.0119   | Over-expressed |
| TSPAN17 | 0.25 | 6.32E-03 | 0.0131   | Over-expressed |
| PTPA    | 0.25 | 6.52E-03 | 0.0134   | Over-expressed |
| PMS2P1  | 0.25 | 6.99E-03 | 0.0143   | Over-expressed |
| STK24   | 0.25 | 8.37E-03 | 0.0167   | Over-expressed |
| AMD1    | 0.25 | 8.54E-03 | 0.017    | Over-expressed |
| HMBS    | 0.25 | 9.24E-03 | 0.0182   | Over-expressed |
| DCP2    | 0.25 | 9.31E-03 | 0.0183   | Over-expressed |
| SFR1    | 0.25 | 0.0102   | 0.0198   | Over-expressed |
| DTNB    | 0.25 | 0.0108   | 0.021    | Over-expressed |
| PWP2    | 0.25 | 0.0121   | 0.0231   | Over-expressed |
| PIM3    | 0.25 | 0.0128   | 0.0242   | Over-expressed |
| OFD1    | 0.25 | 0.0129   | 0.0244   | Over-expressed |
| SUV39H1 | 0.25 | 0.0136   | 0.0255   | Over-expressed |
| HDAC5   | 0.25 | 0.0141   | 0.0264   | Over-expressed |
| TMEM68  | 0.25 | 0.0169   | 0.0309   | Over-expressed |
| TOM1    | 0.25 | 0.0189   | 0.0341   | Over-expressed |
| PHIP    | 0.25 | 0.0212   | 0.0378   | Over-expressed |
| SLC50A1 | 0.25 | 0.023    | 0.0406   | Over-expressed |
| DNAJC30 | 0.25 | 0.0247   | 0.0433   | Over-expressed |
| HNRNPL  | 0.24 | 4.10E-05 | 1.61E-04 | Over-expressed |
| COMMD3  | 0.24 | 6.41E-05 | 2.37E-04 | Over-expressed |
| NAT10   | 0.24 | 2.26E-04 | 7.14E-04 | Over-expressed |
| CHTOP   | 0.24 | 2.29E-04 | 7.22E-04 | Over-expressed |
| GTF2A2  | 0.24 | 2.43E-04 | 7.62E-04 | Over-expressed |
| UBE2R2  | 0.24 | 2.55E-04 | 7.92E-04 | Over-expressed |
| FAM32A  | 0.24 | 2.67E-04 | 8.24E-04 | Over-expressed |
| ACTR8   | 0.24 | 3.77E-04 | 1.12E-03 | Over-expressed |
| GPKOW   | 0.24 | 5.72E-04 | 1.60E-03 | Over-expressed |
| HARS    | 0.24 | 6.80E-04 | 1.87E-03 | Over-expressed |
| ELP6    | 0.24 | 1.07E-03 | 2.75E-03 | Over-expressed |
| SKP1    | 0.24 | 1.27E-03 | 3.19E-03 | Over-expressed |
| CRIP1   | 0.24 | 1.39E-03 | 3.47E-03 | Over-expressed |
| NUDT3   | 0.24 | 1.49E-03 | 3.67E-03 | Over-expressed |
| TEPSIN  | 0.24 | 1.59E-03 | 3.90E-03 | Over-expressed |
| GNL2    | 0.24 | 1.91E-03 | 4.56E-03 | Over-expressed |
| FTSJ3   | 0.24 | 1.91E-03 | 4.57E-03 | Over-expressed |
| EXOSC3  | 0.24 | 2.38E-03 | 5.55E-03 | Over-expressed |
| WBP1    | 0.24 | 2.52E-03 | 5.84E-03 | Over-expressed |
| TSFM    | 0.24 | 2.54E-03 | 5.88E-03 | Over-expressed |
| MORC2   | 0.24 | 2.67E-03 | 6.15E-03 | Over-expressed |
| ZCCHC17 | 0.24 | 2.85E-03 | 6.53E-03 | Over-expressed |
| TELO2   | 0.24 | 3.24E-03 | 7.29E-03 | Over-expressed |
| INPP5A  | 0.24 | 3.93E-03 | 8.61E-03 | Over-expressed |
| SARS    | 0.24 | 4.33E-03 | 9.39E-03 | Over-expressed |
| ZCCHC10 | 0.24 | 4.75E-03 | 0.0102   | Over-expressed |
| HNRNPAB | 0.24 | 5.00E-03 | 0.0106   | Over-expressed |
| POLG2   | 0.24 | 5.18E-03 | 0.011    | Over-expressed |
| GNPAT   | 0.24 | 6.27E-03 | 0.013    | Over-expressed |



|          |      |          |          |                |
|----------|------|----------|----------|----------------|
| ZNF766   | 0.24 | 6.48E-03 | 0.0133   | Over-expressed |
| SLC41A3  | 0.24 | 6.83E-03 | 0.014    | Over-expressed |
| LIAS     | 0.24 | 6.85E-03 | 0.014    | Over-expressed |
| PSPC1    | 0.24 | 8.58E-03 | 0.0171   | Over-expressed |
| MGME1    | 0.24 | 9.24E-03 | 0.0182   | Over-expressed |
| SPNS1    | 0.24 | 9.68E-03 | 0.019    | Over-expressed |
| DYNC2LI1 | 0.24 | 9.80E-03 | 0.0192   | Over-expressed |
| ADCK2    | 0.24 | 0.0103   | 0.0201   | Over-expressed |
| ING4     | 0.24 | 0.0105   | 0.0204   | Over-expressed |
| UTP4     | 0.24 | 0.0105   | 0.0204   | Over-expressed |
| CEP250   | 0.24 | 0.0107   | 0.0206   | Over-expressed |
| METTL18  | 0.24 | 0.0117   | 0.0224   | Over-expressed |
| ATP13A1  | 0.24 | 0.0118   | 0.0225   | Over-expressed |
| RMDN1    | 0.24 | 0.0138   | 0.0258   | Over-expressed |
| TIMM44   | 0.24 | 0.0143   | 0.0266   | Over-expressed |
| GLO1     | 0.24 | 0.0155   | 0.0287   | Over-expressed |
| RTL10    | 0.24 | 0.0165   | 0.0303   | Over-expressed |
| UROD     | 0.24 | 0.0205   | 0.0366   | Over-expressed |
| CHMP3    | 0.24 | 0.0209   | 0.0373   | Over-expressed |
| LDHA     | 0.24 | 0.0218   | 0.0387   | Over-expressed |
| ZNF26    | 0.24 | 0.0223   | 0.0395   | Over-expressed |
| STUB1    | 0.24 | 0.0239   | 0.042    | Over-expressed |
| HNRNPC   | 0.23 | 1.26E-05 | 5.74E-05 | Over-expressed |
| IK       | 0.23 | 4.53E-05 | 1.75E-04 | Over-expressed |
| STRADA   | 0.23 | 5.19E-05 | 1.97E-04 | Over-expressed |
| UTP6     | 0.23 | 1.04E-03 | 2.69E-03 | Over-expressed |
| MORF4L1  | 0.23 | 1.24E-03 | 3.14E-03 | Over-expressed |
| RAMAC    | 0.23 | 1.28E-03 | 3.22E-03 | Over-expressed |
| RBM8A    | 0.23 | 1.51E-03 | 3.72E-03 | Over-expressed |
| GTF2F1   | 0.23 | 1.92E-03 | 4.60E-03 | Over-expressed |
| RANBP3   | 0.23 | 2.18E-03 | 5.16E-03 | Over-expressed |
| TRIM27   | 0.23 | 2.45E-03 | 5.70E-03 | Over-expressed |
| USP5     | 0.23 | 2.51E-03 | 5.83E-03 | Over-expressed |
| KRI1     | 0.23 | 2.66E-03 | 6.15E-03 | Over-expressed |
| DDX55    | 0.23 | 2.76E-03 | 6.34E-03 | Over-expressed |
| LAS1L    | 0.23 | 3.40E-03 | 7.59E-03 | Over-expressed |
| MTHFSD   | 0.23 | 3.51E-03 | 7.81E-03 | Over-expressed |
| ESS2     | 0.23 | 3.75E-03 | 8.25E-03 | Over-expressed |
| PPP6R1   | 0.23 | 4.37E-03 | 9.46E-03 | Over-expressed |
| STX4     | 0.23 | 5.15E-03 | 0.0109   | Over-expressed |
| FO XK2   | 0.23 | 5.16E-03 | 0.0109   | Over-expressed |
| GNRHR2   | 0.23 | 5.21E-03 | 0.011    | Over-expressed |
| CCZ1     | 0.23 | 5.43E-03 | 0.0114   | Over-expressed |
| EPN1     | 0.23 | 5.61E-03 | 0.0117   | Over-expressed |
| CDK5RAP3 | 0.23 | 7.40E-03 | 0.015    | Over-expressed |
| CMC1     | 0.23 | 7.69E-03 | 0.0155   | Over-expressed |
| TMEM69   | 0.23 | 7.75E-03 | 0.0156   | Over-expressed |
| PIGH     | 0.23 | 7.92E-03 | 0.0159   | Over-expressed |
| AHSA1    | 0.23 | 0.0107   | 0.0206   | Over-expressed |
| SETD4    | 0.23 | 0.0108   | 0.0208   | Over-expressed |
| TMEM60   | 0.23 | 0.0113   | 0.0216   | Over-expressed |
| PPOX     | 0.23 | 0.0113   | 0.0217   | Over-expressed |
| CEP164   | 0.23 | 0.0142   | 0.0265   | Over-expressed |
| HNRNPH1  | 0.23 | 0.0144   | 0.0269   | Over-expressed |
| CAMTA1   | 0.23 | 0.0184   | 0.0333   | Over-expressed |
| WARS2    | 0.23 | 0.0196   | 0.0352   | Over-expressed |
| PELO     | 0.23 | 0.02     | 0.0359   | Over-expressed |

|          |      |          |          |                |
|----------|------|----------|----------|----------------|
| ENTR1    | 0.23 | 0.0203   | 0.0364   | Over-expressed |
| ATPAF2   | 0.23 | 0.0234   | 0.0412   | Over-expressed |
| POLR2J3  | 0.23 | 0.0253   | 0.0442   | Over-expressed |
| EEF2     | 0.23 | 0.0255   | 0.0444   | Over-expressed |
| ZNF767P  | 0.23 | 0.0285   | 0.0491   | Over-expressed |
| DNAJB12  | 0.22 | 2.14E-05 | 9.12E-05 | Over-expressed |
| PTBP1    | 0.22 | 1.11E-04 | 3.83E-04 | Over-expressed |
| MRPL30   | 0.22 | 2.02E-04 | 6.49E-04 | Over-expressed |
| RNF220   | 0.22 | 3.44E-04 | 1.03E-03 | Over-expressed |
| DNTTIP2  | 0.22 | 9.72E-04 | 2.54E-03 | Over-expressed |
| XPNPEP1  | 0.22 | 1.01E-03 | 2.62E-03 | Over-expressed |
| CDC16    | 0.22 | 1.15E-03 | 2.93E-03 | Over-expressed |
| TSN      | 0.22 | 2.45E-03 | 5.69E-03 | Over-expressed |
| STMP1    | 0.22 | 3.65E-03 | 8.05E-03 | Over-expressed |
| WIP12    | 0.22 | 3.86E-03 | 8.46E-03 | Over-expressed |
| SIRT3    | 0.22 | 4.56E-03 | 9.82E-03 | Over-expressed |
| MAN2B1   | 0.22 | 5.51E-03 | 0.0116   | Over-expressed |
| PIGC     | 0.22 | 5.52E-03 | 0.0116   | Over-expressed |
| STX6     | 0.22 | 5.53E-03 | 0.0116   | Over-expressed |
| AP2M1    | 0.22 | 5.53E-03 | 0.0116   | Over-expressed |
| CANT1    | 0.22 | 6.09E-03 | 0.0126   | Over-expressed |
| KNOP1    | 0.22 | 6.50E-03 | 0.0134   | Over-expressed |
| CNOT3    | 0.22 | 6.79E-03 | 0.0139   | Over-expressed |
| RPS6KB2  | 0.22 | 6.92E-03 | 0.0142   | Over-expressed |
| HNRNPDL  | 0.22 | 7.05E-03 | 0.0144   | Over-expressed |
| SMIM7    | 0.22 | 7.33E-03 | 0.0149   | Over-expressed |
| ZNF75A   | 0.22 | 8.00E-03 | 0.0161   | Over-expressed |
| SNUPN    | 0.22 | 8.08E-03 | 0.0162   | Over-expressed |
| FTSJ1    | 0.22 | 8.58E-03 | 0.0171   | Over-expressed |
| SLC39A13 | 0.22 | 9.12E-03 | 0.018    | Over-expressed |
| EHD1     | 0.22 | 9.16E-03 | 0.0181   | Over-expressed |
| TXNDC12  | 0.22 | 9.49E-03 | 0.0186   | Over-expressed |
| NIP7     | 0.22 | 0.0104   | 0.0202   | Over-expressed |
| MEPCE    | 0.22 | 0.0106   | 0.0206   | Over-expressed |
| COG4     | 0.22 | 0.011    | 0.0212   | Over-expressed |
| DCAF4    | 0.22 | 0.0113   | 0.0216   | Over-expressed |
| WDR5     | 0.22 | 0.0127   | 0.0241   | Over-expressed |
| CZIB     | 0.22 | 0.0128   | 0.0242   | Over-expressed |
| C10ORF88 | 0.22 | 0.0144   | 0.0269   | Over-expressed |
| PSMB2    | 0.22 | 0.0145   | 0.027    | Over-expressed |
| MED15    | 0.22 | 0.0151   | 0.0279   | Over-expressed |
| GPS1     | 0.22 | 0.0153   | 0.0283   | Over-expressed |
| C22ORF39 | 0.22 | 0.0157   | 0.029    | Over-expressed |
| ALG5     | 0.22 | 0.0167   | 0.0306   | Over-expressed |
| NUP43    | 0.22 | 0.0175   | 0.0318   | Over-expressed |
| ZNF565   | 0.22 | 0.0179   | 0.0324   | Over-expressed |
| ZNF764   | 0.22 | 0.0184   | 0.0333   | Over-expressed |
| NUP88    | 0.22 | 0.019    | 0.0343   | Over-expressed |
| METTL21A | 0.22 | 0.0236   | 0.0415   | Over-expressed |
| ZNF84    | 0.22 | 0.025    | 0.0437   | Over-expressed |
| AP1S1    | 0.22 | 0.0253   | 0.0441   | Over-expressed |
| TAPBP    | 0.22 | 0.026    | 0.0453   | Over-expressed |
| SLC26A11 | 0.22 | 0.0281   | 0.0486   | Over-expressed |
| TARDBP   | 0.21 | 6.49E-07 | 4.43E-06 | Over-expressed |
| YTHDF1   | 0.21 | 9.38E-05 | 3.32E-04 | Over-expressed |
| SUMO1    | 0.21 | 1.44E-04 | 4.80E-04 | Over-expressed |
| TLK2     | 0.21 | 1.58E-04 | 5.24E-04 | Over-expressed |

|           |      |          |          |                |
|-----------|------|----------|----------|----------------|
| BUD13     | 0.21 | 1.88E-04 | 6.10E-04 | Over-expressed |
| METTL17   | 0.21 | 3.75E-04 | 1.11E-03 | Over-expressed |
| CNPPD1    | 0.21 | 4.48E-04 | 1.30E-03 | Over-expressed |
| CNOT2     | 0.21 | 5.71E-04 | 1.60E-03 | Over-expressed |
| AKAP8     | 0.21 | 6.50E-04 | 1.79E-03 | Over-expressed |
| TRPC4AP   | 0.21 | 9.19E-04 | 2.42E-03 | Over-expressed |
| SMARCE1   | 0.21 | 1.06E-03 | 2.73E-03 | Over-expressed |
| TXNDC9    | 0.21 | 1.34E-03 | 3.37E-03 | Over-expressed |
| C12ORF4   | 0.21 | 1.40E-03 | 3.49E-03 | Over-expressed |
| CIR1      | 0.21 | 1.41E-03 | 3.51E-03 | Over-expressed |
| TRAPPC3   | 0.21 | 2.02E-03 | 4.80E-03 | Over-expressed |
| EXOC4     | 0.21 | 2.23E-03 | 5.26E-03 | Over-expressed |
| TEFM      | 0.21 | 2.52E-03 | 5.85E-03 | Over-expressed |
| GMEB2     | 0.21 | 3.07E-03 | 6.94E-03 | Over-expressed |
| U2AF2     | 0.21 | 3.67E-03 | 8.10E-03 | Over-expressed |
| SMAP1     | 0.21 | 3.93E-03 | 8.61E-03 | Over-expressed |
| EIF2D     | 0.21 | 4.15E-03 | 9.03E-03 | Over-expressed |
| UBAC1     | 0.21 | 4.19E-03 | 9.10E-03 | Over-expressed |
| C1ORF52   | 0.21 | 4.40E-03 | 9.51E-03 | Over-expressed |
| FAM53C    | 0.21 | 4.84E-03 | 0.0103   | Over-expressed |
| RABIF     | 0.21 | 5.18E-03 | 0.011    | Over-expressed |
| XRRA1     | 0.21 | 5.51E-03 | 0.0116   | Over-expressed |
| TNIP2     | 0.21 | 5.80E-03 | 0.0121   | Over-expressed |
| RABGGTA   | 0.21 | 6.26E-03 | 0.0129   | Over-expressed |
| HNRNPA3P1 | 0.21 | 7.00E-03 | 0.0143   | Over-expressed |
| CCDC43    | 0.21 | 7.17E-03 | 0.0146   | Over-expressed |
| SGSM3     | 0.21 | 8.34E-03 | 0.0167   | Over-expressed |
| VPS4A     | 0.21 | 0.0127   | 0.0241   | Over-expressed |
| NDUFB5    | 0.21 | 0.0128   | 0.0242   | Over-expressed |
| MRPL18    | 0.21 | 0.0138   | 0.0258   | Over-expressed |
| GDI1      | 0.21 | 0.0143   | 0.0266   | Over-expressed |
| GSS       | 0.21 | 0.0154   | 0.0284   | Over-expressed |
| UBL4A     | 0.21 | 0.0193   | 0.0348   | Over-expressed |
| RHOT2     | 0.21 | 0.0211   | 0.0376   | Over-expressed |
| ZDHHC18   | 0.21 | 0.0222   | 0.0393   | Over-expressed |
| YWHAQ     | 0.21 | 0.0242   | 0.0425   | Over-expressed |
| TDG       | 0.21 | 0.0252   | 0.0439   | Over-expressed |
| CIAO1     | 0.2  | 4.93E-05 | 1.89E-04 | Over-expressed |
| TIAL1     | 0.2  | 4.80E-04 | 1.38E-03 | Over-expressed |
| BRAP      | 0.2  | 5.59E-04 | 1.57E-03 | Over-expressed |
| MAPKAPK5  | 0.2  | 7.59E-04 | 2.05E-03 | Over-expressed |
| ORMDL1    | 0.2  | 1.23E-03 | 3.10E-03 | Over-expressed |
| PRR14     | 0.2  | 1.23E-03 | 3.12E-03 | Over-expressed |
| SRSF6     | 0.2  | 1.34E-03 | 3.35E-03 | Over-expressed |
| SAFB      | 0.2  | 1.69E-03 | 4.10E-03 | Over-expressed |
| DYNC1LI1  | 0.2  | 3.06E-03 | 6.94E-03 | Over-expressed |
| ZNF335    | 0.2  | 3.77E-03 | 8.28E-03 | Over-expressed |
| MTMR14    | 0.2  | 4.78E-03 | 0.0102   | Over-expressed |
| ZFYVE27   | 0.2  | 4.92E-03 | 0.0105   | Over-expressed |
| RBM6      | 0.2  | 4.98E-03 | 0.0106   | Over-expressed |
| TBC1D25   | 0.2  | 5.11E-03 | 0.0108   | Over-expressed |
| RFT1      | 0.2  | 5.42E-03 | 0.0114   | Over-expressed |
| RPL7L1    | 0.2  | 5.53E-03 | 0.0116   | Over-expressed |
| PRKAB1    | 0.2  | 5.90E-03 | 0.0123   | Over-expressed |
| HGS       | 0.2  | 7.14E-03 | 0.0145   | Over-expressed |
| CRTC2     | 0.2  | 7.67E-03 | 0.0155   | Over-expressed |
| PSMF1     | 0.2  | 8.63E-03 | 0.0172   | Over-expressed |

|          |      |          |          |                |
|----------|------|----------|----------|----------------|
| EIF4A3   | 0.2  | 8.72E-03 | 0.0173   | Over-expressed |
| RCC1L    | 0.2  | 9.55E-03 | 0.0188   | Over-expressed |
| C7ORF26  | 0.2  | 9.86E-03 | 0.0193   | Over-expressed |
| PRKRA    | 0.2  | 0.0105   | 0.0205   | Over-expressed |
| UBE2E1   | 0.2  | 0.0129   | 0.0244   | Over-expressed |
| SFSWAP   | 0.2  | 0.0138   | 0.0259   | Over-expressed |
| TMA16    | 0.2  | 0.0154   | 0.0284   | Over-expressed |
| GTPBP3   | 0.2  | 0.0155   | 0.0286   | Over-expressed |
| WDR43    | 0.2  | 0.0157   | 0.029    | Over-expressed |
| NKAP     | 0.2  | 0.0174   | 0.0317   | Over-expressed |
| AIDA     | 0.2  | 0.0179   | 0.0326   | Over-expressed |
| TSPAN31  | 0.2  | 0.0182   | 0.0329   | Over-expressed |
| SSRP1    | 0.2  | 0.019    | 0.0343   | Over-expressed |
| LSM6     | 0.2  | 0.0264   | 0.0459   | Over-expressed |
| POMT1    | 0.2  | 0.0291   | 0.05     | Over-expressed |
| ISY1     | 0.19 | 9.57E-04 | 2.51E-03 | Over-expressed |
| UTP11    | 0.19 | 3.23E-03 | 7.26E-03 | Over-expressed |
| ANAPC5   | 0.19 | 3.53E-03 | 7.83E-03 | Over-expressed |
| NGDN     | 0.19 | 4.14E-03 | 9.02E-03 | Over-expressed |
| METTL6   | 0.19 | 4.91E-03 | 0.0105   | Over-expressed |
| ARFGAP2  | 0.19 | 5.69E-03 | 0.0119   | Over-expressed |
| OSER1    | 0.19 | 7.64E-03 | 0.0154   | Over-expressed |
| AAMP     | 0.19 | 7.91E-03 | 0.0159   | Over-expressed |
| APTX     | 0.19 | 8.95E-03 | 0.0177   | Over-expressed |
| RABGEF1  | 0.19 | 0.0108   | 0.0209   | Over-expressed |
| KTI12    | 0.19 | 0.011    | 0.0212   | Over-expressed |
| RXYLT1   | 0.19 | 0.0116   | 0.0222   | Over-expressed |
| EDC4     | 0.19 | 0.0117   | 0.0223   | Over-expressed |
| RECQL5   | 0.19 | 0.013    | 0.0245   | Over-expressed |
| SCAF1    | 0.19 | 0.0133   | 0.0251   | Over-expressed |
| UBC      | 0.19 | 0.0137   | 0.0256   | Over-expressed |
| LYPLA2P1 | 0.19 | 0.0169   | 0.0309   | Over-expressed |
| TARS     | 0.19 | 0.0178   | 0.0324   | Over-expressed |
| SGSH     | 0.19 | 0.0183   | 0.0332   | Over-expressed |
| TOR2A    | 0.19 | 0.021    | 0.0374   | Over-expressed |
| PKIG     | 0.19 | 0.0211   | 0.0376   | Over-expressed |
| PSMA6    | 0.19 | 0.0218   | 0.0386   | Over-expressed |
| MRPS27   | 0.19 | 0.0224   | 0.0396   | Over-expressed |
| WDR45    | 0.19 | 0.0262   | 0.0456   | Over-expressed |
| PSMC3    | 0.19 | 0.0274   | 0.0475   | Over-expressed |
| METTL8   | 0.19 | 0.0287   | 0.0494   | Over-expressed |
| PPP2R3C  | 0.19 | 0.0289   | 0.0498   | Over-expressed |
| ARMH3    | 0.18 | 3.61E-04 | 1.08E-03 | Over-expressed |
| VPS33B   | 0.18 | 2.68E-03 | 6.17E-03 | Over-expressed |
| SETD6    | 0.18 | 2.86E-03 | 6.53E-03 | Over-expressed |
| RAB1B    | 0.18 | 4.45E-03 | 9.62E-03 | Over-expressed |
| BLOC1S2  | 0.18 | 4.78E-03 | 0.0102   | Over-expressed |
| SRSF7    | 0.18 | 5.00E-03 | 0.0106   | Over-expressed |
| RBM19    | 0.18 | 0.0114   | 0.0219   | Over-expressed |
| GRSF1    | 0.18 | 0.0117   | 0.0224   | Over-expressed |
| CDC37    | 0.18 | 0.0118   | 0.0226   | Over-expressed |
| ZNF282   | 0.18 | 0.0124   | 0.0235   | Over-expressed |
| SPCS2    | 0.18 | 0.013    | 0.0245   | Over-expressed |
| IST1     | 0.18 | 0.0148   | 0.0275   | Over-expressed |
| PRKCSH   | 0.18 | 0.0165   | 0.0303   | Over-expressed |
| PSMG2    | 0.18 | 0.0171   | 0.0312   | Over-expressed |
| DDX31    | 0.18 | 0.0189   | 0.034    | Over-expressed |

|          |       |          |          |                 |
|----------|-------|----------|----------|-----------------|
| PSMD7    | 0.18  | 0.0209   | 0.0373   | Over-expressed  |
| MLF2     | 0.18  | 0.0217   | 0.0385   | Over-expressed  |
| SLC35B1  | 0.18  | 0.022    | 0.039    | Over-expressed  |
| HMG20B   | 0.18  | 0.022    | 0.0391   | Over-expressed  |
| KCMF1    | 0.17  | 4.63E-04 | 1.34E-03 | Over-expressed  |
| CCDC174  | 0.17  | 2.15E-03 | 5.08E-03 | Over-expressed  |
| GTF2H4   | 0.17  | 7.89E-03 | 0.0159   | Over-expressed  |
| RBM39    | 0.17  | 0.0111   | 0.0213   | Over-expressed  |
| ZNF263   | 0.17  | 0.0136   | 0.0255   | Over-expressed  |
| MTRF1L   | 0.17  | 0.0145   | 0.0269   | Over-expressed  |
| OSGEP    | 0.17  | 0.0145   | 0.027    | Over-expressed  |
| NOL11    | 0.17  | 0.0162   | 0.0298   | Over-expressed  |
| ZBTB17   | 0.17  | 0.0211   | 0.0376   | Over-expressed  |
| DROSHA   | 0.17  | 0.0227   | 0.04     | Over-expressed  |
| NAE1     | 0.17  | 0.0235   | 0.0414   | Over-expressed  |
| ARHGDI1A | 0.17  | 0.0245   | 0.0429   | Over-expressed  |
| PTPN18   | 0.17  | 0.0248   | 0.0434   | Over-expressed  |
| PKNOX1   | 0.16  | 4.18E-03 | 9.08E-03 | Over-expressed  |
| DAXX     | 0.16  | 5.02E-03 | 0.0107   | Over-expressed  |
| GPBP1    | 0.16  | 5.79E-03 | 0.0121   | Over-expressed  |
| GDI2     | 0.16  | 6.71E-03 | 0.0138   | Over-expressed  |
| PSMA1    | 0.16  | 7.06E-03 | 0.0144   | Over-expressed  |
| CLK3     | 0.16  | 0.01     | 0.0196   | Over-expressed  |
| NKIRAS2  | 0.16  | 0.0152   | 0.0281   | Over-expressed  |
| TPM3     | 0.16  | 0.0159   | 0.0292   | Over-expressed  |
| CSTF1    | 0.16  | 0.017    | 0.031    | Over-expressed  |
| SPATA2   | 0.16  | 0.0204   | 0.0365   | Over-expressed  |
| HMGXB3   | 0.16  | 0.0207   | 0.037    | Over-expressed  |
| CSK      | 0.16  | 0.0224   | 0.0397   | Over-expressed  |
| WDR89    | 0.16  | 0.0247   | 0.0433   | Over-expressed  |
| DPH3     | 0.16  | 0.0254   | 0.0444   | Over-expressed  |
| EXOC6    | 0.16  | 0.0271   | 0.047    | Over-expressed  |
| ZNF3     | 0.16  | 0.0278   | 0.0481   | Over-expressed  |
| C2ORF49  | 0.16  | 0.028    | 0.0484   | Over-expressed  |
| MRPL42   | 0.16  | 0.0288   | 0.0496   | Over-expressed  |
| RBM45    | 0.15  | 6.20E-03 | 0.0128   | Over-expressed  |
| MUS81    | 0.15  | 8.41E-03 | 0.0168   | Over-expressed  |
| NOL10    | 0.15  | 8.90E-03 | 0.0176   | Over-expressed  |
| AP2A2    | 0.15  | 0.0116   | 0.0222   | Over-expressed  |
| HNRNPU   | 0.15  | 0.014    | 0.0262   | Over-expressed  |
| NAIF1    | 0.15  | 0.0182   | 0.033    | Over-expressed  |
| AAR2     | 0.15  | 0.02     | 0.0358   | Over-expressed  |
| BUB3     | 0.15  | 0.021    | 0.0375   | Over-expressed  |
| NSUN4    | 0.15  | 0.0244   | 0.0428   | Over-expressed  |
| COA5     | 0.15  | 0.0286   | 0.0493   | Over-expressed  |
| BET1L    | 0.14  | 0.014    | 0.0262   | Over-expressed  |
| TRIP4    | 0.14  | 0.0142   | 0.0266   | Over-expressed  |
| VPS29    | 0.14  | 0.0156   | 0.0288   | Over-expressed  |
| ANAPC16  | 0.14  | 0.0225   | 0.0397   | Over-expressed  |
| METTTL2A | 0.14  | 0.0285   | 0.0491   | Over-expressed  |
| EIF2B1   | 0.13  | 0.0223   | 0.0395   | Over-expressed  |
| XRCC5    | 0.13  | 0.0238   | 0.0418   | Over-expressed  |
| LSM12    | 0.13  | 0.0276   | 0.0478   | Over-expressed  |
| RBM14    | 0.12  | 0.0125   | 0.0238   | Over-expressed  |
| CEP63    | -0.12 | 0.0254   | 0.0444   | Under-expressed |
| CUL3     | -0.13 | 0.0278   | 0.0481   | Under-expressed |
| HNRNPK   | -0.14 | 0.0185   | 0.0335   | Under-expressed |

|          |       |          |          |                 |
|----------|-------|----------|----------|-----------------|
| PPID     | -0.14 | 0.0197   | 0.0354   | Under-expressed |
| TOMM70   | -0.14 | 0.026    | 0.0452   | Under-expressed |
| TBC1D15  | -0.14 | 0.0268   | 0.0465   | Under-expressed |
| PSMD11   | -0.14 | 0.0271   | 0.047    | Under-expressed |
| QRICH1   | -0.14 | 0.0284   | 0.049    | Under-expressed |
| SLC25A17 | -0.15 | 0.0134   | 0.0253   | Under-expressed |
| GSPT1    | -0.15 | 0.0168   | 0.0308   | Under-expressed |
| SYNRG    | -0.15 | 0.0237   | 0.0417   | Under-expressed |
| C16ORF72 | -0.16 | 7.87E-03 | 0.0158   | Under-expressed |
| TFG      | -0.16 | 0.0127   | 0.024    | Under-expressed |
| ARL8B    | -0.16 | 0.0148   | 0.0274   | Under-expressed |
| C2ORF42  | -0.16 | 0.0165   | 0.0302   | Under-expressed |
| VPS39    | -0.16 | 0.0219   | 0.0389   | Under-expressed |
| MIEF1    | -0.16 | 0.0252   | 0.0439   | Under-expressed |
| ZNF592   | -0.16 | 0.0252   | 0.044    | Under-expressed |
| SENP5    | -0.17 | 7.22E-03 | 0.0147   | Under-expressed |
| ZFAND6   | -0.17 | 7.37E-03 | 0.0149   | Under-expressed |
| TINF2    | -0.17 | 0.0119   | 0.0228   | Under-expressed |
| COPG1    | -0.17 | 0.0123   | 0.0235   | Under-expressed |
| NSUN2    | -0.17 | 0.0129   | 0.0244   | Under-expressed |
| MAIP1    | -0.17 | 0.0145   | 0.0269   | Under-expressed |
| ATG16L1  | -0.17 | 0.0149   | 0.0276   | Under-expressed |
| PAK2     | -0.17 | 0.0152   | 0.0281   | Under-expressed |
| DNAJC21  | -0.17 | 0.018    | 0.0327   | Under-expressed |
| CHTF8    | -0.17 | 0.0212   | 0.0377   | Under-expressed |
| IPO8     | -0.17 | 0.0215   | 0.0382   | Under-expressed |
| ARF6     | -0.17 | 0.0224   | 0.0397   | Under-expressed |
| DHDDS    | -0.17 | 0.0241   | 0.0423   | Under-expressed |
| SBDS     | -0.17 | 0.025    | 0.0438   | Under-expressed |
| N4BP1    | -0.18 | 1.54E-03 | 3.79E-03 | Under-expressed |
| PPP6C    | -0.18 | 2.23E-03 | 5.26E-03 | Under-expressed |
| BCL2L13  | -0.18 | 3.32E-03 | 7.44E-03 | Under-expressed |
| DHX8     | -0.18 | 3.47E-03 | 7.73E-03 | Under-expressed |
| CNOT4    | -0.18 | 3.52E-03 | 7.81E-03 | Under-expressed |
| ANKRD40  | -0.18 | 7.85E-03 | 0.0158   | Under-expressed |
| BCAS2    | -0.18 | 9.67E-03 | 0.019    | Under-expressed |
| ARHGAP17 | -0.18 | 0.011    | 0.0212   | Under-expressed |
| EML3     | -0.18 | 0.0119   | 0.0226   | Under-expressed |
| CYB561A3 | -0.18 | 0.013    | 0.0245   | Under-expressed |
| GUF1     | -0.18 | 0.0134   | 0.0253   | Under-expressed |
| USP10    | -0.18 | 0.014    | 0.0262   | Under-expressed |
| HUS1     | -0.18 | 0.0142   | 0.0265   | Under-expressed |
| CAMK2G   | -0.18 | 0.0147   | 0.0274   | Under-expressed |
| ABCB7    | -0.18 | 0.0171   | 0.0312   | Under-expressed |
| C12ORF29 | -0.18 | 0.0179   | 0.0325   | Under-expressed |
| SIAH1    | -0.18 | 0.0191   | 0.0345   | Under-expressed |
| ZNF324   | -0.18 | 0.0238   | 0.0418   | Under-expressed |
| BCAP29   | -0.18 | 0.0239   | 0.0421   | Under-expressed |
| NUP42    | -0.18 | 0.0262   | 0.0455   | Under-expressed |
| MKRN2    | -0.18 | 0.0267   | 0.0464   | Under-expressed |
| TSC2     | -0.18 | 0.0286   | 0.0493   | Under-expressed |
| RAB7A    | -0.19 | 1.04E-04 | 3.64E-04 | Under-expressed |
| THRAP3   | -0.19 | 1.13E-03 | 2.89E-03 | Under-expressed |
| UBA5     | -0.19 | 1.97E-03 | 4.69E-03 | Under-expressed |
| PSEN1    | -0.19 | 5.30E-03 | 0.0112   | Under-expressed |
| ZBTB3    | -0.19 | 6.79E-03 | 0.0139   | Under-expressed |
| ZNF24    | -0.19 | 6.95E-03 | 0.0142   | Under-expressed |

|          |       |          |          |                 |
|----------|-------|----------|----------|-----------------|
| CTCF     | -0.19 | 7.07E-03 | 0.0144   | Under-expressed |
| CSDE1    | -0.19 | 0.0103   | 0.0201   | Under-expressed |
| FGFR1OP2 | -0.19 | 0.0108   | 0.0208   | Under-expressed |
| C7ORF25  | -0.19 | 0.012    | 0.0228   | Under-expressed |
| RPTOR    | -0.19 | 0.0126   | 0.024    | Under-expressed |
| EAPP     | -0.19 | 0.0127   | 0.024    | Under-expressed |
| INTS7    | -0.19 | 0.0131   | 0.0247   | Under-expressed |
| UBA3     | -0.19 | 0.014    | 0.0262   | Under-expressed |
| BZW1     | -0.19 | 0.0156   | 0.0287   | Under-expressed |
| SAP30L   | -0.19 | 0.0164   | 0.03     | Under-expressed |
| EI24     | -0.19 | 0.0164   | 0.0302   | Under-expressed |
| RAB22A   | -0.19 | 0.0175   | 0.0319   | Under-expressed |
| SLC35B3  | -0.19 | 0.0182   | 0.0329   | Under-expressed |
| RMC1     | -0.19 | 0.0199   | 0.0357   | Under-expressed |
| TBRG1    | -0.19 | 0.0207   | 0.0369   | Under-expressed |
| SHOC2    | -0.19 | 0.0208   | 0.0372   | Under-expressed |
| ZFYVE16  | -0.19 | 0.0258   | 0.0449   | Under-expressed |
| HS2ST1   | -0.19 | 0.0276   | 0.0477   | Under-expressed |
| LYRM7    | -0.19 | 0.0278   | 0.0481   | Under-expressed |
| ZDHHHC5  | -0.2  | 6.96E-04 | 1.90E-03 | Under-expressed |
| RAB5B    | -0.2  | 2.71E-03 | 6.24E-03 | Under-expressed |
| TM9SF1   | -0.2  | 2.78E-03 | 6.38E-03 | Under-expressed |
| C3ORF38  | -0.2  | 3.42E-03 | 7.63E-03 | Under-expressed |
| NFX1     | -0.2  | 4.34E-03 | 9.41E-03 | Under-expressed |
| KLHL12   | -0.2  | 4.88E-03 | 0.0104   | Under-expressed |
| MMADHC   | -0.2  | 5.47E-03 | 0.0115   | Under-expressed |
| SMAD4    | -0.2  | 7.31E-03 | 0.0148   | Under-expressed |
| RO60     | -0.2  | 7.78E-03 | 0.0157   | Under-expressed |
| EZH1     | -0.2  | 8.05E-03 | 0.0162   | Under-expressed |
| WWP2     | -0.2  | 9.57E-03 | 0.0188   | Under-expressed |
| DPP9     | -0.2  | 0.0141   | 0.0264   | Under-expressed |
| USP24    | -0.2  | 0.0146   | 0.0271   | Under-expressed |
| KDM5A    | -0.2  | 0.0148   | 0.0274   | Under-expressed |
| PPP1CB   | -0.2  | 0.0148   | 0.0275   | Under-expressed |
| MAPKAPK2 | -0.2  | 0.0169   | 0.0309   | Under-expressed |
| RAB10    | -0.2  | 0.0247   | 0.0433   | Under-expressed |
| SPG21    | -0.21 | 6.17E-04 | 1.71E-03 | Under-expressed |
| BAG5     | -0.21 | 1.74E-03 | 4.21E-03 | Under-expressed |
| NMT1     | -0.21 | 1.84E-03 | 4.42E-03 | Under-expressed |
| TMEM167B | -0.21 | 2.25E-03 | 5.30E-03 | Under-expressed |
| PPP1R10  | -0.21 | 2.86E-03 | 6.53E-03 | Under-expressed |
| WDR5B    | -0.21 | 2.87E-03 | 6.56E-03 | Under-expressed |
| ZNF79    | -0.21 | 3.17E-03 | 7.15E-03 | Under-expressed |
| PSMD12   | -0.21 | 4.10E-03 | 8.94E-03 | Under-expressed |
| WBP4     | -0.21 | 4.29E-03 | 9.30E-03 | Under-expressed |
| PUM2     | -0.21 | 4.67E-03 | 0.01     | Under-expressed |
| SETD1B   | -0.21 | 4.78E-03 | 0.0102   | Under-expressed |
| CDC27    | -0.21 | 4.82E-03 | 0.0103   | Under-expressed |
| RNF40    | -0.21 | 6.15E-03 | 0.0128   | Under-expressed |
| CYFIP1   | -0.21 | 6.37E-03 | 0.0131   | Under-expressed |
| FAM20B   | -0.21 | 7.17E-03 | 0.0146   | Under-expressed |
| KDSR     | -0.21 | 7.19E-03 | 0.0146   | Under-expressed |
| TNPO1    | -0.21 | 8.65E-03 | 0.0172   | Under-expressed |
| SYAP1    | -0.21 | 0.0109   | 0.021    | Under-expressed |
| ALG2     | -0.21 | 0.0111   | 0.0214   | Under-expressed |
| AMBRA1   | -0.21 | 0.0112   | 0.0215   | Under-expressed |
| PPP1R2   | -0.21 | 0.0118   | 0.0225   | Under-expressed |

|          |       |          |          |                 |
|----------|-------|----------|----------|-----------------|
| ATP6V1B2 | -0.21 | 0.0135   | 0.0253   | Under-expressed |
| CPSF7    | -0.21 | 0.0155   | 0.0287   | Under-expressed |
| YIPF5    | -0.21 | 0.0161   | 0.0296   | Under-expressed |
| RAB3GAP2 | -0.21 | 0.0186   | 0.0336   | Under-expressed |
| PTGR2    | -0.21 | 0.0196   | 0.0352   | Under-expressed |
| PEX11B   | -0.21 | 0.0204   | 0.0366   | Under-expressed |
| ALKBH8   | -0.21 | 0.0215   | 0.0382   | Under-expressed |
| PIAS1    | -0.21 | 0.0258   | 0.0449   | Under-expressed |
| EHD4     | -0.21 | 0.0268   | 0.0465   | Under-expressed |
| SERTAD2  | -0.21 | 0.0276   | 0.0478   | Under-expressed |
| VPS8     | -0.22 | 7.21E-04 | 1.96E-03 | Under-expressed |
| RTF1     | -0.22 | 1.14E-03 | 2.92E-03 | Under-expressed |
| METTL15  | -0.22 | 1.68E-03 | 4.09E-03 | Under-expressed |
| HDHD2    | -0.22 | 1.79E-03 | 4.32E-03 | Under-expressed |
| PIIG     | -0.22 | 1.85E-03 | 4.45E-03 | Under-expressed |
| CPSF2    | -0.22 | 2.86E-03 | 6.53E-03 | Under-expressed |
| TMED2    | -0.22 | 3.11E-03 | 7.04E-03 | Under-expressed |
| MLX      | -0.22 | 3.22E-03 | 7.25E-03 | Under-expressed |
| SAP130   | -0.22 | 4.21E-03 | 9.14E-03 | Under-expressed |
| CFAP20   | -0.22 | 6.05E-03 | 0.0126   | Under-expressed |
| SLC9A8   | -0.22 | 6.07E-03 | 0.0126   | Under-expressed |
| PAPOLA   | -0.22 | 6.19E-03 | 0.0128   | Under-expressed |
| LUC7L2   | -0.22 | 6.21E-03 | 0.0129   | Under-expressed |
| GIGYF2   | -0.22 | 7.20E-03 | 0.0146   | Under-expressed |
| KIAA1191 | -0.22 | 9.44E-03 | 0.0186   | Under-expressed |
| PSMD10   | -0.22 | 0.0102   | 0.0199   | Under-expressed |
| SMIM13   | -0.22 | 0.0105   | 0.0203   | Under-expressed |
| CHMP5    | -0.22 | 0.0113   | 0.0218   | Under-expressed |
| GMFB     | -0.22 | 0.0118   | 0.0226   | Under-expressed |
| REEP3    | -0.22 | 0.0122   | 0.0232   | Under-expressed |
| PGBD2    | -0.22 | 0.0141   | 0.0264   | Under-expressed |
| CBLL1    | -0.22 | 0.0154   | 0.0285   | Under-expressed |
| VIPAS39  | -0.22 | 0.0155   | 0.0287   | Under-expressed |
| BCKDK    | -0.22 | 0.0161   | 0.0297   | Under-expressed |
| USP34    | -0.22 | 0.0164   | 0.0301   | Under-expressed |
| PNPT1    | -0.22 | 0.0177   | 0.0322   | Under-expressed |
| SPCS3    | -0.22 | 0.0204   | 0.0365   | Under-expressed |
| TNKS1BP1 | -0.22 | 0.0212   | 0.0378   | Under-expressed |
| BPGM     | -0.22 | 0.0218   | 0.0386   | Under-expressed |
| PRRC2C   | -0.22 | 0.0244   | 0.0427   | Under-expressed |
| CAMK2D   | -0.22 | 0.0251   | 0.0439   | Under-expressed |
| GOSR1    | -0.23 | 9.19E-05 | 3.26E-04 | Under-expressed |
| C6ORF89  | -0.23 | 4.11E-04 | 1.20E-03 | Under-expressed |
| SELENOT  | -0.23 | 5.74E-04 | 1.60E-03 | Under-expressed |
| RAB14    | -0.23 | 7.88E-04 | 2.12E-03 | Under-expressed |
| GANAB    | -0.23 | 1.70E-03 | 4.13E-03 | Under-expressed |
| GNS      | -0.23 | 2.05E-03 | 4.87E-03 | Under-expressed |
| SNAP23   | -0.23 | 2.20E-03 | 5.19E-03 | Under-expressed |
| TYW1     | -0.23 | 2.96E-03 | 6.73E-03 | Under-expressed |
| UTP15    | -0.23 | 3.34E-03 | 7.48E-03 | Under-expressed |
| SCFD2    | -0.23 | 3.41E-03 | 7.62E-03 | Under-expressed |
| TCHP     | -0.23 | 3.65E-03 | 8.06E-03 | Under-expressed |
| AP2A1    | -0.23 | 3.86E-03 | 8.48E-03 | Under-expressed |
| CDK12    | -0.23 | 4.16E-03 | 9.04E-03 | Under-expressed |
| HAUS2    | -0.23 | 4.38E-03 | 9.48E-03 | Under-expressed |
| SPECC1L  | -0.23 | 4.69E-03 | 0.0101   | Under-expressed |
| ZNF646   | -0.23 | 5.47E-03 | 0.0115   | Under-expressed |



|          |       |          |          |                 |
|----------|-------|----------|----------|-----------------|
| DNAJA2   | -0.23 | 6.25E-03 | 0.0129   | Under-expressed |
| GATAD2B  | -0.23 | 8.54E-03 | 0.017    | Under-expressed |
| TRMT61B  | -0.23 | 8.75E-03 | 0.0174   | Under-expressed |
| ARL2BP   | -0.23 | 0.0114   | 0.0219   | Under-expressed |
| JKAMP    | -0.23 | 0.013    | 0.0246   | Under-expressed |
| CTIF     | -0.23 | 0.0136   | 0.0256   | Under-expressed |
| TRIM33   | -0.23 | 0.0157   | 0.029    | Under-expressed |
| SELENON  | -0.23 | 0.0168   | 0.0308   | Under-expressed |
| FLCN     | -0.23 | 0.017    | 0.031    | Under-expressed |
| ATF1     | -0.23 | 0.0181   | 0.0328   | Under-expressed |
| ZZEF1    | -0.23 | 0.0192   | 0.0345   | Under-expressed |
| INVS     | -0.23 | 0.0206   | 0.0369   | Under-expressed |
| FLYWCH1  | -0.23 | 0.0239   | 0.0421   | Under-expressed |
| CMIP     | -0.23 | 0.0246   | 0.0431   | Under-expressed |
| CCNDBP1  | -0.23 | 0.0251   | 0.0439   | Under-expressed |
| MFSD4B   | -0.23 | 0.0259   | 0.0451   | Under-expressed |
| PEX14    | -0.23 | 0.0264   | 0.0459   | Under-expressed |
| RIPK1    | -0.24 | 3.97E-05 | 1.56E-04 | Under-expressed |
| SETD3    | -0.24 | 5.89E-04 | 1.64E-03 | Under-expressed |
| RAB8A    | -0.24 | 7.50E-04 | 2.03E-03 | Under-expressed |
| ABRAXAS2 | -0.24 | 8.01E-04 | 2.15E-03 | Under-expressed |
| DELE1    | -0.24 | 8.75E-04 | 2.32E-03 | Under-expressed |
| ASB8     | -0.24 | 8.87E-04 | 2.35E-03 | Under-expressed |
| VPS26B   | -0.24 | 9.62E-04 | 2.52E-03 | Under-expressed |
| MUL1     | -0.24 | 1.11E-03 | 2.83E-03 | Under-expressed |
| PPP2R5C  | -0.24 | 1.63E-03 | 3.97E-03 | Under-expressed |
| ELOA     | -0.24 | 1.76E-03 | 4.26E-03 | Under-expressed |
| FOPNL    | -0.24 | 1.85E-03 | 4.44E-03 | Under-expressed |
| ASB7     | -0.24 | 2.22E-03 | 5.24E-03 | Under-expressed |
| MEF2D    | -0.24 | 3.51E-03 | 7.80E-03 | Under-expressed |
| ZNF200   | -0.24 | 3.56E-03 | 7.88E-03 | Under-expressed |
| ARCN1    | -0.24 | 3.58E-03 | 7.92E-03 | Under-expressed |
| FAM193A  | -0.24 | 3.83E-03 | 8.41E-03 | Under-expressed |
| TENT4A   | -0.24 | 4.13E-03 | 8.99E-03 | Under-expressed |
| ZNF786   | -0.24 | 4.49E-03 | 9.68E-03 | Under-expressed |
| NSL1     | -0.24 | 5.20E-03 | 0.011    | Under-expressed |
| CLN5     | -0.24 | 5.79E-03 | 0.0121   | Under-expressed |
| BAZ1B    | -0.24 | 5.88E-03 | 0.0123   | Under-expressed |
| PARP16   | -0.24 | 6.90E-03 | 0.0141   | Under-expressed |
| SEC16A   | -0.24 | 7.93E-03 | 0.0159   | Under-expressed |
| WDR36    | -0.24 | 8.20E-03 | 0.0164   | Under-expressed |
| PPP1R13B | -0.24 | 8.34E-03 | 0.0167   | Under-expressed |
| RAB28    | -0.24 | 9.35E-03 | 0.0184   | Under-expressed |
| TMEM104  | -0.24 | 0.0105   | 0.0204   | Under-expressed |
| EGLN1    | -0.24 | 0.0108   | 0.0208   | Under-expressed |
| KMT5B    | -0.24 | 0.0133   | 0.025    | Under-expressed |
| ABI1     | -0.24 | 0.0152   | 0.0281   | Under-expressed |
| GID4     | -0.24 | 0.0213   | 0.0379   | Under-expressed |
| FBXW11   | -0.24 | 0.022    | 0.0391   | Under-expressed |
| ZNF182   | -0.24 | 0.0241   | 0.0423   | Under-expressed |
| ZNF267   | -0.24 | 0.0248   | 0.0435   | Under-expressed |
| SUGP2    | -0.24 | 0.0251   | 0.0438   | Under-expressed |
| USP7     | -0.25 | 8.87E-05 | 3.16E-04 | Under-expressed |
| SECISBP2 | -0.25 | 2.54E-04 | 7.90E-04 | Under-expressed |
| ATMIN    | -0.25 | 3.74E-04 | 1.11E-03 | Under-expressed |
| CAB39    | -0.25 | 3.88E-04 | 1.14E-03 | Under-expressed |
| CWC25    | -0.25 | 4.13E-04 | 1.21E-03 | Under-expressed |

|          |       |          |          |                 |
|----------|-------|----------|----------|-----------------|
| THAP12   | -0.25 | 4.79E-04 | 1.37E-03 | Under-expressed |
| CUL1     | -0.25 | 6.83E-04 | 1.87E-03 | Under-expressed |
| RNF20    | -0.25 | 9.89E-04 | 2.58E-03 | Under-expressed |
| SCFD1    | -0.25 | 9.90E-04 | 2.58E-03 | Under-expressed |
| CMTR1    | -0.25 | 1.01E-03 | 2.62E-03 | Under-expressed |
| NCBP1    | -0.25 | 1.09E-03 | 2.81E-03 | Under-expressed |
| TMEM131  | -0.25 | 1.21E-03 | 3.06E-03 | Under-expressed |
| SF3A1    | -0.25 | 1.37E-03 | 3.42E-03 | Under-expressed |
| UBN1     | -0.25 | 1.46E-03 | 3.61E-03 | Under-expressed |
| BLOC1S6  | -0.25 | 1.59E-03 | 3.90E-03 | Under-expressed |
| ZSCAN21  | -0.25 | 1.68E-03 | 4.09E-03 | Under-expressed |
| MICU1    | -0.25 | 1.81E-03 | 4.35E-03 | Under-expressed |
| ARPP19   | -0.25 | 2.25E-03 | 5.30E-03 | Under-expressed |
| DCAF12   | -0.25 | 2.59E-03 | 6.00E-03 | Under-expressed |
| USPL1    | -0.25 | 2.88E-03 | 6.57E-03 | Under-expressed |
| ANGEL2   | -0.25 | 3.17E-03 | 7.15E-03 | Under-expressed |
| MON1B    | -0.25 | 3.32E-03 | 7.44E-03 | Under-expressed |
| DNAJC11  | -0.25 | 3.39E-03 | 7.58E-03 | Under-expressed |
| MORF4L2  | -0.25 | 3.44E-03 | 7.67E-03 | Under-expressed |
| HERC4    | -0.25 | 3.51E-03 | 7.80E-03 | Under-expressed |
| STYX     | -0.25 | 3.63E-03 | 8.03E-03 | Under-expressed |
| SLC30A5  | -0.25 | 3.71E-03 | 8.17E-03 | Under-expressed |
| CEP120   | -0.25 | 4.20E-03 | 9.12E-03 | Under-expressed |
| CAPN7    | -0.25 | 4.25E-03 | 9.21E-03 | Under-expressed |
| NDFIP1   | -0.25 | 4.67E-03 | 0.01     | Under-expressed |
| FAM219A  | -0.25 | 4.84E-03 | 0.0103   | Under-expressed |
| OTUD7B   | -0.25 | 5.02E-03 | 0.0107   | Under-expressed |
| SF3B1    | -0.25 | 6.18E-03 | 0.0128   | Under-expressed |
| CNDP2    | -0.25 | 6.22E-03 | 0.0129   | Under-expressed |
| USP14    | -0.25 | 6.66E-03 | 0.0137   | Under-expressed |
| SIN3A    | -0.25 | 7.60E-03 | 0.0154   | Under-expressed |
| FAM111A  | -0.25 | 8.20E-03 | 0.0164   | Under-expressed |
| FBXO9    | -0.25 | 8.48E-03 | 0.0169   | Under-expressed |
| GRB10    | -0.25 | 8.52E-03 | 0.017    | Under-expressed |
| UBA6     | -0.25 | 9.53E-03 | 0.0187   | Under-expressed |
| ACAD10   | -0.25 | 0.0108   | 0.0209   | Under-expressed |
| HIRA     | -0.25 | 0.0109   | 0.0211   | Under-expressed |
| ZNF326   | -0.25 | 0.0109   | 0.0211   | Under-expressed |
| SMG8     | -0.25 | 0.0122   | 0.0232   | Under-expressed |
| ZNF655   | -0.25 | 0.0124   | 0.0236   | Under-expressed |
| TTC7A    | -0.25 | 0.013    | 0.0246   | Under-expressed |
| CLPB     | -0.25 | 0.0142   | 0.0264   | Under-expressed |
| FOXJ3    | -0.25 | 0.0143   | 0.0267   | Under-expressed |
| CEP57    | -0.25 | 0.0143   | 0.0268   | Under-expressed |
| APPL2    | -0.25 | 0.0154   | 0.0284   | Under-expressed |
| QTRT2    | -0.25 | 0.017    | 0.031    | Under-expressed |
| CNOT7    | -0.25 | 0.0184   | 0.0333   | Under-expressed |
| PLA2G12A | -0.25 | 0.021    | 0.0374   | Under-expressed |
| KIF1BP   | -0.25 | 0.0222   | 0.0393   | Under-expressed |
| MBTD1    | -0.25 | 0.0283   | 0.0489   | Under-expressed |
| UBE4A    | -0.26 | 1.05E-04 | 3.65E-04 | Under-expressed |
| ZW10     | -0.26 | 2.09E-04 | 6.67E-04 | Under-expressed |
| MRFAP1L1 | -0.26 | 2.68E-04 | 8.27E-04 | Under-expressed |
| GRIPAP1  | -0.26 | 3.00E-04 | 9.13E-04 | Under-expressed |
| UBAP1    | -0.26 | 4.21E-04 | 1.23E-03 | Under-expressed |
| OCIAD1   | -0.26 | 6.91E-04 | 1.89E-03 | Under-expressed |
| GHITM    | -0.26 | 7.50E-04 | 2.03E-03 | Under-expressed |

|          |       |          |          |                 |
|----------|-------|----------|----------|-----------------|
| MFSD11   | -0.26 | 7.86E-04 | 2.12E-03 | Under-expressed |
| UBE3A    | -0.26 | 9.31E-04 | 2.45E-03 | Under-expressed |
| KPNA6    | -0.26 | 1.07E-03 | 2.75E-03 | Under-expressed |
| TRAPPC13 | -0.26 | 1.41E-03 | 3.50E-03 | Under-expressed |
| COQ10B   | -0.26 | 1.48E-03 | 3.66E-03 | Under-expressed |
| ARHGEF7  | -0.26 | 1.68E-03 | 4.09E-03 | Under-expressed |
| MSL2     | -0.26 | 1.70E-03 | 4.13E-03 | Under-expressed |
| ZNF639   | -0.26 | 1.74E-03 | 4.22E-03 | Under-expressed |
| PDE6D    | -0.26 | 1.82E-03 | 4.38E-03 | Under-expressed |
| DNAJC24  | -0.26 | 2.32E-03 | 5.43E-03 | Under-expressed |
| TLK1     | -0.26 | 2.84E-03 | 6.51E-03 | Under-expressed |
| MFSD8    | -0.26 | 2.92E-03 | 6.66E-03 | Under-expressed |
| NIPBL    | -0.26 | 2.96E-03 | 6.72E-03 | Under-expressed |
| SEC63    | -0.26 | 2.97E-03 | 6.74E-03 | Under-expressed |
| HMG20A   | -0.26 | 3.63E-03 | 8.01E-03 | Under-expressed |
| POMGNT2  | -0.26 | 3.71E-03 | 8.17E-03 | Under-expressed |
| BACE1    | -0.26 | 4.37E-03 | 9.45E-03 | Under-expressed |
| ATG2A    | -0.26 | 5.07E-03 | 0.0108   | Under-expressed |
| CLPTM1   | -0.26 | 5.15E-03 | 0.0109   | Under-expressed |
| ENOX2    | -0.26 | 5.25E-03 | 0.0111   | Under-expressed |
| FAM172A  | -0.26 | 5.57E-03 | 0.0117   | Under-expressed |
| MBNL1    | -0.26 | 6.01E-03 | 0.0125   | Under-expressed |
| CUL4A    | -0.26 | 6.15E-03 | 0.0128   | Under-expressed |
| DARS2    | -0.26 | 6.80E-03 | 0.0139   | Under-expressed |
| ZC3H11A  | -0.26 | 7.00E-03 | 0.0143   | Under-expressed |
| SNN      | -0.26 | 7.37E-03 | 0.0149   | Under-expressed |
| ODR4     | -0.26 | 7.57E-03 | 0.0153   | Under-expressed |
| NIT1     | -0.26 | 7.76E-03 | 0.0156   | Under-expressed |
| REV1     | -0.26 | 8.51E-03 | 0.017    | Under-expressed |
| SCAI     | -0.26 | 9.08E-03 | 0.018    | Under-expressed |
| GFPT1    | -0.26 | 9.57E-03 | 0.0188   | Under-expressed |
| GDPGP1   | -0.26 | 0.011    | 0.0212   | Under-expressed |
| HIRIP3   | -0.26 | 0.0112   | 0.0216   | Under-expressed |
| BCL2L2   | -0.26 | 0.0123   | 0.0233   | Under-expressed |
| MTMR3    | -0.26 | 0.0126   | 0.0239   | Under-expressed |
| BTBD7    | -0.26 | 0.0128   | 0.0243   | Under-expressed |
| UBN2     | -0.26 | 0.0128   | 0.0243   | Under-expressed |
| TMEM128  | -0.26 | 0.0132   | 0.0248   | Under-expressed |
| ORC3     | -0.26 | 0.014    | 0.0262   | Under-expressed |
| NUDT16   | -0.26 | 0.0147   | 0.0274   | Under-expressed |
| GRK5     | -0.26 | 0.0149   | 0.0277   | Under-expressed |
| NDEL1    | -0.26 | 0.0155   | 0.0286   | Under-expressed |
| SDHB     | -0.26 | 0.0156   | 0.0287   | Under-expressed |
| NAB1     | -0.26 | 0.0157   | 0.029    | Under-expressed |
| MTRF1    | -0.26 | 0.0175   | 0.0319   | Under-expressed |
| KDM1B    | -0.26 | 0.0193   | 0.0348   | Under-expressed |
| OCRL     | -0.26 | 0.0194   | 0.035    | Under-expressed |
| AHDC1    | -0.26 | 0.0221   | 0.0391   | Under-expressed |
| TTC5     | -0.26 | 0.0268   | 0.0465   | Under-expressed |
| ITPKB    | -0.26 | 0.0274   | 0.0474   | Under-expressed |
| DIP2A    | -0.26 | 0.0276   | 0.0477   | Under-expressed |
| TGFBR1   | -0.26 | 0.0279   | 0.0482   | Under-expressed |
| LSG1     | -0.27 | 2.04E-06 | 1.18E-05 | Under-expressed |
| FAM120A  | -0.27 | 1.67E-05 | 7.32E-05 | Under-expressed |
| CLTC     | -0.27 | 1.85E-05 | 7.99E-05 | Under-expressed |
| UBR4     | -0.27 | 1.12E-04 | 3.87E-04 | Under-expressed |
| PDHX     | -0.27 | 2.26E-04 | 7.14E-04 | Under-expressed |

|           |       |          |          |                 |
|-----------|-------|----------|----------|-----------------|
| CGGBP1    | -0.27 | 2.77E-04 | 8.53E-04 | Under-expressed |
| TYK2      | -0.27 | 3.23E-04 | 9.75E-04 | Under-expressed |
| CYTH1     | -0.27 | 7.69E-04 | 2.07E-03 | Under-expressed |
| DCAKD     | -0.27 | 9.27E-04 | 2.44E-03 | Under-expressed |
| KDM4B     | -0.27 | 1.07E-03 | 2.75E-03 | Under-expressed |
| GNA13     | -0.27 | 1.08E-03 | 2.77E-03 | Under-expressed |
| RAB1A     | -0.27 | 1.14E-03 | 2.92E-03 | Under-expressed |
| ARIH1     | -0.27 | 1.29E-03 | 3.23E-03 | Under-expressed |
| HBS1L     | -0.27 | 1.48E-03 | 3.65E-03 | Under-expressed |
| ATPAF1    | -0.27 | 1.50E-03 | 3.70E-03 | Under-expressed |
| TOLLIP    | -0.27 | 1.65E-03 | 4.02E-03 | Under-expressed |
| TMX1      | -0.27 | 1.83E-03 | 4.39E-03 | Under-expressed |
| LUZP6     | -0.27 | 2.20E-03 | 5.20E-03 | Under-expressed |
| DNAJC14   | -0.27 | 2.26E-03 | 5.30E-03 | Under-expressed |
| DCAF6     | -0.27 | 2.54E-03 | 5.88E-03 | Under-expressed |
| LINC01278 | -0.27 | 2.65E-03 | 6.12E-03 | Under-expressed |
| DIAPH1    | -0.27 | 2.73E-03 | 6.28E-03 | Under-expressed |
| CD164     | -0.27 | 2.90E-03 | 6.61E-03 | Under-expressed |
| PRKAA1    | -0.27 | 3.05E-03 | 6.90E-03 | Under-expressed |
| SDAD1     | -0.27 | 3.44E-03 | 7.66E-03 | Under-expressed |
| FBXW7     | -0.27 | 3.59E-03 | 7.95E-03 | Under-expressed |
| RAP1A     | -0.27 | 3.96E-03 | 8.67E-03 | Under-expressed |
| TMEM170A  | -0.27 | 4.01E-03 | 8.75E-03 | Under-expressed |
| TIMM21    | -0.27 | 4.42E-03 | 9.55E-03 | Under-expressed |
| ZNF562    | -0.27 | 4.69E-03 | 0.0101   | Under-expressed |
| PTPN9     | -0.27 | 5.29E-03 | 0.0112   | Under-expressed |
| PDS5A     | -0.27 | 5.89E-03 | 0.0123   | Under-expressed |
| NAA35     | -0.27 | 5.95E-03 | 0.0124   | Under-expressed |
| TMEM209   | -0.27 | 6.50E-03 | 0.0134   | Under-expressed |
| ASF1A     | -0.27 | 6.95E-03 | 0.0142   | Under-expressed |
| ACBD3     | -0.27 | 7.02E-03 | 0.0143   | Under-expressed |
| CHD2      | -0.27 | 7.25E-03 | 0.0147   | Under-expressed |
| WDFY1     | -0.27 | 7.48E-03 | 0.0151   | Under-expressed |
| LUZP1     | -0.27 | 8.18E-03 | 0.0164   | Under-expressed |
| SNX27     | -0.27 | 9.04E-03 | 0.0179   | Under-expressed |
| ACER3     | -0.27 | 9.56E-03 | 0.0188   | Under-expressed |
| CHD1      | -0.27 | 9.82E-03 | 0.0192   | Under-expressed |
| RPRD2     | -0.27 | 0.0105   | 0.0204   | Under-expressed |
| RPS6KC1   | -0.27 | 0.0108   | 0.0209   | Under-expressed |
| RBM7      | -0.27 | 0.015    | 0.0278   | Under-expressed |
| FOXO3     | -0.27 | 0.0155   | 0.0286   | Under-expressed |
| FAM3C     | -0.27 | 0.0163   | 0.03     | Under-expressed |
| GPCPD1    | -0.27 | 0.0165   | 0.0302   | Under-expressed |
| CSRNP1    | -0.27 | 0.0173   | 0.0315   | Under-expressed |
| SLC46A1   | -0.27 | 0.0173   | 0.0315   | Under-expressed |
| KLHL9     | -0.27 | 0.0177   | 0.0322   | Under-expressed |
| TMEM129   | -0.27 | 0.0185   | 0.0334   | Under-expressed |
| SHPK      | -0.27 | 0.0186   | 0.0336   | Under-expressed |
| NEDD1     | -0.27 | 0.0222   | 0.0393   | Under-expressed |
| ARHGAP12  | -0.27 | 0.023    | 0.0406   | Under-expressed |
| ZNF189    | -0.27 | 0.0239   | 0.0421   | Under-expressed |
| C2CD3     | -0.27 | 0.0246   | 0.0432   | Under-expressed |
| POLR1A    | -0.27 | 0.0248   | 0.0433   | Under-expressed |
| PPFIBP2   | -0.27 | 0.0257   | 0.0447   | Under-expressed |
| SSBP3     | -0.27 | 0.0262   | 0.0455   | Under-expressed |
| AFAP1L1   | -0.27 | 0.0269   | 0.0467   | Under-expressed |
| GNAI2     | -0.28 | 8.65E-05 | 3.09E-04 | Under-expressed |

|            |       |          |          |                 |
|------------|-------|----------|----------|-----------------|
| USP15      | -0.28 | 1.55E-04 | 5.14E-04 | Under-expressed |
| RNF141     | -0.28 | 2.22E-04 | 7.02E-04 | Under-expressed |
| ADAR       | -0.28 | 3.45E-04 | 1.03E-03 | Under-expressed |
| PCGF5      | -0.28 | 4.10E-04 | 1.20E-03 | Under-expressed |
| MARF1      | -0.28 | 5.45E-04 | 1.53E-03 | Under-expressed |
| ERI2       | -0.28 | 6.82E-04 | 1.87E-03 | Under-expressed |
| DUSP3      | -0.28 | 8.74E-04 | 2.32E-03 | Under-expressed |
| PHF12      | -0.28 | 1.10E-03 | 2.81E-03 | Under-expressed |
| MED1       | -0.28 | 1.12E-03 | 2.85E-03 | Under-expressed |
| CWF19L2    | -0.28 | 1.18E-03 | 3.00E-03 | Under-expressed |
| MBTPS1     | -0.28 | 1.29E-03 | 3.25E-03 | Under-expressed |
| C5ORF22    | -0.28 | 1.31E-03 | 3.29E-03 | Under-expressed |
| CDC5L      | -0.28 | 1.37E-03 | 3.41E-03 | Under-expressed |
| DIS3       | -0.28 | 1.52E-03 | 3.75E-03 | Under-expressed |
| CDKN1B     | -0.28 | 1.93E-03 | 4.61E-03 | Under-expressed |
| GOLGA2     | -0.28 | 1.95E-03 | 4.65E-03 | Under-expressed |
| CLDN12     | -0.28 | 2.14E-03 | 5.07E-03 | Under-expressed |
| STRIP1     | -0.28 | 2.31E-03 | 5.40E-03 | Under-expressed |
| FCHSD2     | -0.28 | 2.36E-03 | 5.51E-03 | Under-expressed |
| ANKRD13C   | -0.28 | 2.60E-03 | 6.02E-03 | Under-expressed |
| MACO1      | -0.28 | 2.84E-03 | 6.51E-03 | Under-expressed |
| EIF4G2     | -0.28 | 3.36E-03 | 7.52E-03 | Under-expressed |
| LRRC37A16P | -0.28 | 3.45E-03 | 7.70E-03 | Under-expressed |
| ZFAND3     | -0.28 | 3.63E-03 | 8.02E-03 | Under-expressed |
| PRRC1      | -0.28 | 3.69E-03 | 8.12E-03 | Under-expressed |
| RNF213     | -0.28 | 3.88E-03 | 8.50E-03 | Under-expressed |
| HARBI1     | -0.28 | 3.92E-03 | 8.58E-03 | Under-expressed |
| NBR1       | -0.28 | 4.08E-03 | 8.89E-03 | Under-expressed |
| PPP2R5A    | -0.28 | 5.22E-03 | 0.011    | Under-expressed |
| RABGAP1    | -0.28 | 5.26E-03 | 0.0111   | Under-expressed |
| PIGB       | -0.28 | 5.66E-03 | 0.0118   | Under-expressed |
| SENP6      | -0.28 | 7.91E-03 | 0.0159   | Under-expressed |
| PANK4      | -0.28 | 8.42E-03 | 0.0168   | Under-expressed |
| BNIP3L     | -0.28 | 9.18E-03 | 0.0181   | Under-expressed |
| SGPP1      | -0.28 | 9.23E-03 | 0.0182   | Under-expressed |
| CHP1       | -0.28 | 9.50E-03 | 0.0187   | Under-expressed |
| ZNF546     | -0.28 | 0.0101   | 0.0197   | Under-expressed |
| ZNF181     | -0.28 | 0.0109   | 0.0211   | Under-expressed |
| UNKL       | -0.28 | 0.0113   | 0.0217   | Under-expressed |
| ATF6B      | -0.28 | 0.0123   | 0.0235   | Under-expressed |
| PDIA4      | -0.28 | 0.0127   | 0.024    | Under-expressed |
| IKZF5      | -0.28 | 0.0137   | 0.0256   | Under-expressed |
| C16ORF70   | -0.28 | 0.0157   | 0.0289   | Under-expressed |
| SEPTIN11   | -0.28 | 0.0166   | 0.0304   | Under-expressed |
| ABHD4      | -0.28 | 0.0168   | 0.0307   | Under-expressed |
| PMS2CL     | -0.28 | 0.0173   | 0.0314   | Under-expressed |
| VPS13B     | -0.28 | 0.0181   | 0.0329   | Under-expressed |
| KIAA0513   | -0.28 | 0.0191   | 0.0345   | Under-expressed |
| DOP1A      | -0.28 | 0.0197   | 0.0354   | Under-expressed |
| NCOA6      | -0.28 | 0.0199   | 0.0357   | Under-expressed |
| ZNF184     | -0.28 | 0.0229   | 0.0405   | Under-expressed |
| IMPAD1     | -0.28 | 0.0268   | 0.0466   | Under-expressed |
| ZNF785     | -0.28 | 0.0279   | 0.0482   | Under-expressed |
| CPTP       | -0.28 | 0.0284   | 0.049    | Under-expressed |
| GORASP1    | -0.29 | 2.72E-08 | 2.93E-07 | Under-expressed |
| DDX5       | -0.29 | 3.24E-05 | 1.31E-04 | Under-expressed |
| DNAJC16    | -0.29 | 6.58E-05 | 2.42E-04 | Under-expressed |

|            |       |          |          |                 |
|------------|-------|----------|----------|-----------------|
| UBE3B      | -0.29 | 1.06E-04 | 3.70E-04 | Under-expressed |
| BSDC1      | -0.29 | 1.50E-04 | 5.00E-04 | Under-expressed |
| SEC22C     | -0.29 | 2.23E-04 | 7.06E-04 | Under-expressed |
| PURA       | -0.29 | 2.80E-04 | 8.59E-04 | Under-expressed |
| MYNN       | -0.29 | 3.02E-04 | 9.21E-04 | Under-expressed |
| OSTF1      | -0.29 | 3.81E-04 | 1.13E-03 | Under-expressed |
| PGGT1B     | -0.29 | 3.85E-04 | 1.14E-03 | Under-expressed |
| RBM18      | -0.29 | 4.77E-04 | 1.37E-03 | Under-expressed |
| INO80      | -0.29 | 5.39E-04 | 1.52E-03 | Under-expressed |
| MTMR12     | -0.29 | 5.78E-04 | 1.61E-03 | Under-expressed |
| RNF4       | -0.29 | 9.01E-04 | 2.38E-03 | Under-expressed |
| COL4A3BP   | -0.29 | 1.04E-03 | 2.69E-03 | Under-expressed |
| PIGO       | -0.29 | 1.35E-03 | 3.38E-03 | Under-expressed |
| SEC31A     | -0.29 | 1.52E-03 | 3.74E-03 | Under-expressed |
| DHX29      | -0.29 | 1.63E-03 | 3.97E-03 | Under-expressed |
| ZBTB7A     | -0.29 | 1.88E-03 | 4.51E-03 | Under-expressed |
| ANKFY1     | -0.29 | 2.06E-03 | 4.90E-03 | Under-expressed |
| ERGIC1     | -0.29 | 2.60E-03 | 6.01E-03 | Under-expressed |
| CHMP1B     | -0.29 | 2.63E-03 | 6.07E-03 | Under-expressed |
| RPRD1B     | -0.29 | 2.66E-03 | 6.14E-03 | Under-expressed |
| KRR1       | -0.29 | 2.86E-03 | 6.54E-03 | Under-expressed |
| G3BP2      | -0.29 | 2.88E-03 | 6.58E-03 | Under-expressed |
| GRAMD2B    | -0.29 | 3.28E-03 | 7.37E-03 | Under-expressed |
| CNOT6L     | -0.29 | 3.29E-03 | 7.37E-03 | Under-expressed |
| RCHY1      | -0.29 | 3.63E-03 | 8.03E-03 | Under-expressed |
| SMC5       | -0.29 | 3.89E-03 | 8.53E-03 | Under-expressed |
| COQ6       | -0.29 | 4.23E-03 | 9.19E-03 | Under-expressed |
| TRIM32     | -0.29 | 5.56E-03 | 0.0116   | Under-expressed |
| CATSPER2P1 | -0.29 | 5.77E-03 | 0.012    | Under-expressed |
| CNEP1R1    | -0.29 | 7.90E-03 | 0.0159   | Under-expressed |
| SCAF8      | -0.29 | 8.58E-03 | 0.0171   | Under-expressed |
| CPNE3      | -0.29 | 8.79E-03 | 0.0175   | Under-expressed |
| BCAS3      | -0.29 | 9.04E-03 | 0.0179   | Under-expressed |
| USP46      | -0.29 | 9.08E-03 | 0.018    | Under-expressed |
| SP100      | -0.29 | 9.41E-03 | 0.0185   | Under-expressed |
| FASTKD5    | -0.29 | 0.0108   | 0.0209   | Under-expressed |
| FAM122B    | -0.29 | 0.0146   | 0.0272   | Under-expressed |
| SBF1       | -0.29 | 0.0148   | 0.0275   | Under-expressed |
| ZDHHC17    | -0.29 | 0.0175   | 0.0319   | Under-expressed |
| FAM117A    | -0.29 | 0.0181   | 0.0328   | Under-expressed |
| DLL4       | -0.29 | 0.0183   | 0.0331   | Under-expressed |
| ZNF180     | -0.29 | 0.0211   | 0.0376   | Under-expressed |
| API5       | -0.3  | 4.29E-07 | 3.09E-06 | Under-expressed |
| MRPL49     | -0.3  | 5.08E-06 | 2.60E-05 | Under-expressed |
| USP19      | -0.3  | 1.12E-05 | 5.18E-05 | Under-expressed |
| THAP6      | -0.3  | 2.61E-05 | 1.09E-04 | Under-expressed |
| SLTM       | -0.3  | 5.94E-05 | 2.22E-04 | Under-expressed |
| FAM160A2   | -0.3  | 6.80E-05 | 2.49E-04 | Under-expressed |
| RC3H1      | -0.3  | 1.70E-04 | 5.57E-04 | Under-expressed |
| CRBN       | -0.3  | 1.95E-04 | 6.30E-04 | Under-expressed |
| RIOK3      | -0.3  | 2.67E-04 | 8.24E-04 | Under-expressed |
| WDR20      | -0.3  | 2.85E-04 | 8.74E-04 | Under-expressed |
| CEPT1      | -0.3  | 3.93E-04 | 1.16E-03 | Under-expressed |
| GPBP1L1    | -0.3  | 4.27E-04 | 1.24E-03 | Under-expressed |
| SYPL1      | -0.3  | 4.68E-04 | 1.35E-03 | Under-expressed |
| CUL2       | -0.3  | 4.98E-04 | 1.42E-03 | Under-expressed |
| SEPTIN7    | -0.3  | 5.84E-04 | 1.62E-03 | Under-expressed |

|          |       |          |          |                 |
|----------|-------|----------|----------|-----------------|
| APPL1    | -0.3  | 6.68E-04 | 1.84E-03 | Under-expressed |
| MICU2    | -0.3  | 7.03E-04 | 1.92E-03 | Under-expressed |
| TMED10   | -0.3  | 9.52E-04 | 2.50E-03 | Under-expressed |
| EID1     | -0.3  | 1.16E-03 | 2.96E-03 | Under-expressed |
| DTD2     | -0.3  | 1.27E-03 | 3.19E-03 | Under-expressed |
| PKD1     | -0.3  | 1.39E-03 | 3.46E-03 | Under-expressed |
| MAPKBP1  | -0.3  | 1.89E-03 | 4.53E-03 | Under-expressed |
| CYB5RL   | -0.3  | 2.13E-03 | 5.04E-03 | Under-expressed |
| PSMD5    | -0.3  | 2.60E-03 | 6.02E-03 | Under-expressed |
| LRRC57   | -0.3  | 2.63E-03 | 6.08E-03 | Under-expressed |
| HACD3    | -0.3  | 3.16E-03 | 7.13E-03 | Under-expressed |
| PNKD     | -0.3  | 3.23E-03 | 7.27E-03 | Under-expressed |
| FAM45A   | -0.3  | 3.28E-03 | 7.36E-03 | Under-expressed |
| GTF2E1   | -0.3  | 3.32E-03 | 7.44E-03 | Under-expressed |
| OXSRI    | -0.3  | 3.55E-03 | 7.87E-03 | Under-expressed |
| SLC35A1  | -0.3  | 3.62E-03 | 8.00E-03 | Under-expressed |
| AKTIP    | -0.3  | 3.62E-03 | 8.01E-03 | Under-expressed |
| STAM     | -0.3  | 4.03E-03 | 8.80E-03 | Under-expressed |
| TRAK1    | -0.3  | 4.47E-03 | 9.66E-03 | Under-expressed |
| AKT2     | -0.3  | 4.77E-03 | 0.0102   | Under-expressed |
| ICE1     | -0.3  | 4.98E-03 | 0.0106   | Under-expressed |
| GBA      | -0.3  | 5.10E-03 | 0.0108   | Under-expressed |
| MED21    | -0.3  | 5.22E-03 | 0.011    | Under-expressed |
| GXYLT1   | -0.3  | 5.23E-03 | 0.011    | Under-expressed |
| FBXO4    | -0.3  | 5.31E-03 | 0.0112   | Under-expressed |
| CLCN6    | -0.3  | 5.51E-03 | 0.0116   | Under-expressed |
| PSIP1    | -0.3  | 7.41E-03 | 0.015    | Under-expressed |
| PDIA5    | -0.3  | 7.72E-03 | 0.0156   | Under-expressed |
| KIAA0556 | -0.3  | 9.24E-03 | 0.0182   | Under-expressed |
| ATXN7L3B | -0.3  | 9.39E-03 | 0.0185   | Under-expressed |
| SPOPL    | -0.3  | 9.80E-03 | 0.0192   | Under-expressed |
| DENND5A  | -0.3  | 9.90E-03 | 0.0193   | Under-expressed |
| MDM2     | -0.3  | 9.90E-03 | 0.0193   | Under-expressed |
| IFT88    | -0.3  | 0.0111   | 0.0213   | Under-expressed |
| ITGB1    | -0.3  | 0.0132   | 0.0248   | Under-expressed |
| HACL1    | -0.3  | 0.0146   | 0.0272   | Under-expressed |
| ZBTB33   | -0.3  | 0.0156   | 0.0288   | Under-expressed |
| TICAM1   | -0.3  | 0.0163   | 0.03     | Under-expressed |
| POLR3GL  | -0.3  | 0.0166   | 0.0305   | Under-expressed |
| CREB3L2  | -0.3  | 0.0177   | 0.0322   | Under-expressed |
| ECI2     | -0.3  | 0.024    | 0.0421   | Under-expressed |
| SLC17A5  | -0.3  | 0.0249   | 0.0436   | Under-expressed |
| TAF1B    | -0.3  | 0.0282   | 0.0487   | Under-expressed |
| STAT6    | -0.3  | 0.029    | 0.0499   | Under-expressed |
| STX12    | -0.31 | 6.64E-06 | 3.29E-05 | Under-expressed |
| PEX13    | -0.31 | 1.54E-05 | 6.80E-05 | Under-expressed |
| RAB21    | -0.31 | 2.28E-05 | 9.63E-05 | Under-expressed |
| WDR92    | -0.31 | 2.43E-05 | 1.02E-04 | Under-expressed |
| CMPK1    | -0.31 | 3.85E-05 | 1.52E-04 | Under-expressed |
| TXNDC11  | -0.31 | 3.90E-05 | 1.54E-04 | Under-expressed |
| ESYT1    | -0.31 | 4.50E-05 | 1.74E-04 | Under-expressed |
| TAX1BP1  | -0.31 | 1.35E-04 | 4.56E-04 | Under-expressed |
| FBXO7    | -0.31 | 1.37E-04 | 4.63E-04 | Under-expressed |
| ELK1     | -0.31 | 1.70E-04 | 5.58E-04 | Under-expressed |
| RAB6A    | -0.31 | 2.07E-04 | 6.62E-04 | Under-expressed |
| ZFYVE26  | -0.31 | 2.89E-04 | 8.85E-04 | Under-expressed |
| UBP1     | -0.31 | 3.03E-04 | 9.22E-04 | Under-expressed |

|          |       |          |          |                 |
|----------|-------|----------|----------|-----------------|
| ZMYM6    | -0.31 | 3.09E-04 | 9.39E-04 | Under-expressed |
| ING1     | -0.31 | 3.72E-04 | 1.11E-03 | Under-expressed |
| PRDM2    | -0.31 | 4.32E-04 | 1.26E-03 | Under-expressed |
| COPB2    | -0.31 | 4.56E-04 | 1.32E-03 | Under-expressed |
| FAM149B1 | -0.31 | 4.70E-04 | 1.35E-03 | Under-expressed |
| FBXO11   | -0.31 | 5.04E-04 | 1.44E-03 | Under-expressed |
| PHRF1    | -0.31 | 5.83E-04 | 1.62E-03 | Under-expressed |
| DNAJA3   | -0.31 | 5.88E-04 | 1.63E-03 | Under-expressed |
| RHOT1    | -0.31 | 7.92E-04 | 2.13E-03 | Under-expressed |
| USP42    | -0.31 | 8.18E-04 | 2.19E-03 | Under-expressed |
| STAT3    | -0.31 | 8.63E-04 | 2.29E-03 | Under-expressed |
| ZNF746   | -0.31 | 9.31E-04 | 2.45E-03 | Under-expressed |
| AKAP1    | -0.31 | 1.04E-03 | 2.68E-03 | Under-expressed |
| ARMC8    | -0.31 | 1.06E-03 | 2.74E-03 | Under-expressed |
| SOC55    | -0.31 | 1.52E-03 | 3.74E-03 | Under-expressed |
| NAXD     | -0.31 | 1.60E-03 | 3.91E-03 | Under-expressed |
| ELF2     | -0.31 | 2.28E-03 | 5.36E-03 | Under-expressed |
| CEP44    | -0.31 | 2.78E-03 | 6.38E-03 | Under-expressed |
| ENOSF1   | -0.31 | 3.14E-03 | 7.09E-03 | Under-expressed |
| C11ORF71 | -0.31 | 3.70E-03 | 8.14E-03 | Under-expressed |
| TCF20    | -0.31 | 3.83E-03 | 8.40E-03 | Under-expressed |
| B3GLCT   | -0.31 | 5.19E-03 | 0.011    | Under-expressed |
| RFX5     | -0.31 | 5.50E-03 | 0.0115   | Under-expressed |
| PPP1R21  | -0.31 | 5.75E-03 | 0.012    | Under-expressed |
| MAP4K2   | -0.31 | 6.60E-03 | 0.0136   | Under-expressed |
| FGFR1OP  | -0.31 | 6.75E-03 | 0.0139   | Under-expressed |
| GSKIP    | -0.31 | 7.43E-03 | 0.0151   | Under-expressed |
| DBR1     | -0.31 | 9.36E-03 | 0.0184   | Under-expressed |
| NIN      | -0.31 | 0.0112   | 0.0215   | Under-expressed |
| URB2     | -0.31 | 0.0131   | 0.0247   | Under-expressed |
| PPP1R12A | -0.31 | 0.0136   | 0.0256   | Under-expressed |
| FIGNL1   | -0.31 | 0.0163   | 0.03     | Under-expressed |
| SLF1     | -0.31 | 0.0204   | 0.0365   | Under-expressed |
| RGMB     | -0.31 | 0.0206   | 0.0368   | Under-expressed |
| SLC25A10 | -0.31 | 0.0253   | 0.0442   | Under-expressed |
| SLC37A4  | -0.31 | 0.0276   | 0.0478   | Under-expressed |
| C16ORF58 | -0.32 | 2.98E-05 | 1.22E-04 | Under-expressed |
| AGGF1    | -0.32 | 4.13E-05 | 1.62E-04 | Under-expressed |
| ADD1     | -0.32 | 4.55E-05 | 1.76E-04 | Under-expressed |
| TENT4B   | -0.32 | 5.84E-05 | 2.19E-04 | Under-expressed |
| PCF11    | -0.32 | 9.11E-05 | 3.23E-04 | Under-expressed |
| ADIPOR1  | -0.32 | 9.91E-05 | 3.48E-04 | Under-expressed |
| PICALM   | -0.32 | 1.39E-04 | 4.66E-04 | Under-expressed |
| PDSS2    | -0.32 | 1.40E-04 | 4.71E-04 | Under-expressed |
| MSH3     | -0.32 | 1.54E-04 | 5.12E-04 | Under-expressed |
| FKBP15   | -0.32 | 2.16E-04 | 6.88E-04 | Under-expressed |
| PDS5B    | -0.32 | 2.28E-04 | 7.18E-04 | Under-expressed |
| KDM2A    | -0.32 | 2.29E-04 | 7.22E-04 | Under-expressed |
| NRBF2    | -0.32 | 2.33E-04 | 7.33E-04 | Under-expressed |
| MOAP1    | -0.32 | 2.76E-04 | 8.50E-04 | Under-expressed |
| GPALPP1  | -0.32 | 2.82E-04 | 8.65E-04 | Under-expressed |
| WASL     | -0.32 | 3.57E-04 | 1.07E-03 | Under-expressed |
| BBS4     | -0.32 | 3.97E-04 | 1.17E-03 | Under-expressed |
| MTO1     | -0.32 | 4.07E-04 | 1.19E-03 | Under-expressed |
| EXOC2    | -0.32 | 4.18E-04 | 1.22E-03 | Under-expressed |
| ZFHX3    | -0.32 | 4.66E-04 | 1.34E-03 | Under-expressed |
| ETFA     | -0.32 | 4.70E-04 | 1.35E-03 | Under-expressed |



|           |       |          |          |                 |
|-----------|-------|----------|----------|-----------------|
| COG8      | -0.32 | 5.75E-04 | 1.61E-03 | Under-expressed |
| SIDT2     | -0.32 | 6.67E-04 | 1.83E-03 | Under-expressed |
| KPNA3     | -0.32 | 6.79E-04 | 1.86E-03 | Under-expressed |
| UFM1      | -0.32 | 9.66E-04 | 2.52E-03 | Under-expressed |
| THAP1     | -0.32 | 9.68E-04 | 2.53E-03 | Under-expressed |
| MLH1      | -0.32 | 1.10E-03 | 2.82E-03 | Under-expressed |
| TASOR     | -0.32 | 1.31E-03 | 3.29E-03 | Under-expressed |
| XPR1      | -0.32 | 1.42E-03 | 3.52E-03 | Under-expressed |
| CERS2     | -0.32 | 1.42E-03 | 3.53E-03 | Under-expressed |
| PDCD10    | -0.32 | 1.47E-03 | 3.64E-03 | Under-expressed |
| NDUFAF1   | -0.32 | 1.55E-03 | 3.81E-03 | Under-expressed |
| CDADC1    | -0.32 | 1.75E-03 | 4.24E-03 | Under-expressed |
| MIER3     | -0.32 | 1.88E-03 | 4.51E-03 | Under-expressed |
| UQCRC2    | -0.32 | 1.92E-03 | 4.59E-03 | Under-expressed |
| ZNF12     | -0.32 | 2.38E-03 | 5.55E-03 | Under-expressed |
| ANO10     | -0.32 | 2.46E-03 | 5.73E-03 | Under-expressed |
| NDST1     | -0.32 | 2.90E-03 | 6.60E-03 | Under-expressed |
| ATR       | -0.32 | 3.38E-03 | 7.57E-03 | Under-expressed |
| AASDHPPT  | -0.32 | 3.49E-03 | 7.77E-03 | Under-expressed |
| ARFGAP3   | -0.32 | 3.94E-03 | 8.64E-03 | Under-expressed |
| CASP8     | -0.32 | 3.98E-03 | 8.70E-03 | Under-expressed |
| ISG20L2   | -0.32 | 4.46E-03 | 9.62E-03 | Under-expressed |
| RLIM      | -0.32 | 4.52E-03 | 9.74E-03 | Under-expressed |
| NUP160    | -0.32 | 4.67E-03 | 0.01     | Under-expressed |
| LOC220729 | -0.32 | 5.40E-03 | 0.0114   | Under-expressed |
| TUBGCP6   | -0.32 | 6.16E-03 | 0.0128   | Under-expressed |
| PNPLA4    | -0.32 | 6.23E-03 | 0.0129   | Under-expressed |
| ATF7      | -0.32 | 6.26E-03 | 0.0129   | Under-expressed |
| TACC2     | -0.32 | 6.35E-03 | 0.0131   | Under-expressed |
| PTPRF     | -0.32 | 7.29E-03 | 0.0148   | Under-expressed |
| SEC14L1   | -0.32 | 8.61E-03 | 0.0171   | Under-expressed |
| ARMC1     | -0.32 | 8.79E-03 | 0.0175   | Under-expressed |
| RTTN      | -0.32 | 0.0125   | 0.0237   | Under-expressed |
| DGLUCY    | -0.32 | 0.013    | 0.0245   | Under-expressed |
| MAP3K9    | -0.32 | 0.0169   | 0.0308   | Under-expressed |
| PXDC1     | -0.32 | 0.0206   | 0.0368   | Under-expressed |
| CALHM2    | -0.32 | 0.0243   | 0.0427   | Under-expressed |
| SPICE1    | -0.32 | 0.0286   | 0.0493   | Under-expressed |
| RABL3     | -0.33 | 2.03E-07 | 1.64E-06 | Under-expressed |
| RPP14     | -0.33 | 2.67E-06 | 1.48E-05 | Under-expressed |
| GOLGB1    | -0.33 | 1.24E-05 | 5.68E-05 | Under-expressed |
| HP1BP3    | -0.33 | 3.38E-05 | 1.36E-04 | Under-expressed |
| USP47     | -0.33 | 3.89E-05 | 1.54E-04 | Under-expressed |
| TOR1A     | -0.33 | 4.07E-05 | 1.60E-04 | Under-expressed |
| ILRUN     | -0.33 | 4.27E-05 | 1.67E-04 | Under-expressed |
| RBBP6     | -0.33 | 4.80E-05 | 1.84E-04 | Under-expressed |
| TTC31     | -0.33 | 6.54E-05 | 2.41E-04 | Under-expressed |
| BNIP2     | -0.33 | 1.02E-04 | 3.58E-04 | Under-expressed |
| RNF130    | -0.33 | 1.15E-04 | 3.97E-04 | Under-expressed |
| EIF4H     | -0.33 | 1.19E-04 | 4.09E-04 | Under-expressed |
| TRAF3IP1  | -0.33 | 1.25E-04 | 4.26E-04 | Under-expressed |
| ZBTB6     | -0.33 | 1.80E-04 | 5.88E-04 | Under-expressed |
| CMAS      | -0.33 | 3.64E-04 | 1.08E-03 | Under-expressed |
| RNF146    | -0.33 | 3.99E-04 | 1.17E-03 | Under-expressed |
| SMAP2     | -0.33 | 5.39E-04 | 1.52E-03 | Under-expressed |
| ALG13     | -0.33 | 5.42E-04 | 1.53E-03 | Under-expressed |
| RYBP      | -0.33 | 5.74E-04 | 1.60E-03 | Under-expressed |

|          |       |          |          |                 |
|----------|-------|----------|----------|-----------------|
| RFK      | -0.33 | 8.24E-04 | 2.20E-03 | Under-expressed |
| ARL6IP5  | -0.33 | 8.60E-04 | 2.29E-03 | Under-expressed |
| FAM126B  | -0.33 | 9.67E-04 | 2.53E-03 | Under-expressed |
| RSBN1    | -0.33 | 1.04E-03 | 2.69E-03 | Under-expressed |
| SFMBT1   | -0.33 | 1.05E-03 | 2.71E-03 | Under-expressed |
| WDR37    | -0.33 | 1.15E-03 | 2.92E-03 | Under-expressed |
| LEMD3    | -0.33 | 1.46E-03 | 3.60E-03 | Under-expressed |
| TCTA     | -0.33 | 1.46E-03 | 3.61E-03 | Under-expressed |
| LGALS8   | -0.33 | 1.58E-03 | 3.87E-03 | Under-expressed |
| PIP4K2C  | -0.33 | 1.66E-03 | 4.04E-03 | Under-expressed |
| YLPM1    | -0.33 | 1.69E-03 | 4.11E-03 | Under-expressed |
| PRICKLE3 | -0.33 | 1.89E-03 | 4.52E-03 | Under-expressed |
| DR1      | -0.33 | 1.91E-03 | 4.58E-03 | Under-expressed |
| CNIH1    | -0.33 | 1.96E-03 | 4.67E-03 | Under-expressed |
| CTNNB1   | -0.33 | 2.45E-03 | 5.70E-03 | Under-expressed |
| TRIM21   | -0.33 | 2.89E-03 | 6.59E-03 | Under-expressed |
| FCF1     | -0.33 | 3.09E-03 | 7.00E-03 | Under-expressed |
| AIFM1    | -0.33 | 3.36E-03 | 7.53E-03 | Under-expressed |
| ARID4B   | -0.33 | 3.46E-03 | 7.71E-03 | Under-expressed |
| CRKL     | -0.33 | 3.66E-03 | 8.07E-03 | Under-expressed |
| ELMO2    | -0.33 | 3.74E-03 | 8.23E-03 | Under-expressed |
| PTPN1    | -0.33 | 3.97E-03 | 8.69E-03 | Under-expressed |
| SMARCA5  | -0.33 | 4.12E-03 | 8.98E-03 | Under-expressed |
| AMMECR1  | -0.33 | 4.78E-03 | 0.0102   | Under-expressed |
| CCNG1    | -0.33 | 4.91E-03 | 0.0105   | Under-expressed |
| ZMYM2    | -0.33 | 4.97E-03 | 0.0106   | Under-expressed |
| MXI1     | -0.33 | 5.48E-03 | 0.0115   | Under-expressed |
| SPRYD4   | -0.33 | 5.52E-03 | 0.0116   | Under-expressed |
| DEXI     | -0.33 | 6.45E-03 | 0.0133   | Under-expressed |
| DDHD1    | -0.33 | 6.51E-03 | 0.0134   | Under-expressed |
| YPEL1    | -0.33 | 6.53E-03 | 0.0134   | Under-expressed |
| TRAM2    | -0.33 | 6.87E-03 | 0.0141   | Under-expressed |
| KIFAP3   | -0.33 | 9.99E-03 | 0.0195   | Under-expressed |
| RBM12B   | -0.33 | 0.0126   | 0.0239   | Under-expressed |
| SLC35E3  | -0.33 | 0.0127   | 0.0241   | Under-expressed |
| NUAK1    | -0.33 | 0.0139   | 0.026    | Under-expressed |
| IKZF4    | -0.33 | 0.0146   | 0.0272   | Under-expressed |
| BCLAF3   | -0.33 | 0.0161   | 0.0296   | Under-expressed |
| ZNF10    | -0.33 | 0.0169   | 0.0309   | Under-expressed |
| SESTD1   | -0.33 | 0.0185   | 0.0334   | Under-expressed |
| MCF2L    | -0.33 | 0.0196   | 0.0352   | Under-expressed |
| LIMA1    | -0.33 | 0.0226   | 0.0399   | Under-expressed |
| ZMIZ1    | -0.33 | 0.0235   | 0.0414   | Under-expressed |
| CEP19    | -0.33 | 0.0281   | 0.0486   | Under-expressed |
| CUL5     | -0.34 | 4.51E-05 | 1.74E-04 | Under-expressed |
| NUP98    | -0.34 | 5.74E-05 | 2.15E-04 | Under-expressed |
| TRIM4    | -0.34 | 8.28E-05 | 2.97E-04 | Under-expressed |
| LIN54    | -0.34 | 1.10E-04 | 3.80E-04 | Under-expressed |
| FBXO33   | -0.34 | 1.21E-04 | 4.13E-04 | Under-expressed |
| THUMPD1  | -0.34 | 1.62E-04 | 5.34E-04 | Under-expressed |
| TRMT10A  | -0.34 | 1.84E-04 | 5.97E-04 | Under-expressed |
| FAM185A  | -0.34 | 1.92E-04 | 6.24E-04 | Under-expressed |
| ZFR      | -0.34 | 2.02E-04 | 6.48E-04 | Under-expressed |
| ZNFX1    | -0.34 | 2.72E-04 | 8.37E-04 | Under-expressed |
| SCAF4    | -0.34 | 2.89E-04 | 8.85E-04 | Under-expressed |
| FAM177A1 | -0.34 | 3.12E-04 | 9.48E-04 | Under-expressed |
| ZZZ3     | -0.34 | 3.36E-04 | 1.01E-03 | Under-expressed |

|           |       |          |          |                 |
|-----------|-------|----------|----------|-----------------|
| SLC30A9   | -0.34 | 3.91E-04 | 1.15E-03 | Under-expressed |
| NECAP1    | -0.34 | 3.93E-04 | 1.16E-03 | Under-expressed |
| RSU1      | -0.34 | 3.95E-04 | 1.16E-03 | Under-expressed |
| LOC646214 | -0.34 | 5.09E-04 | 1.45E-03 | Under-expressed |
| RBM27     | -0.34 | 5.40E-04 | 1.52E-03 | Under-expressed |
| CASP9     | -0.34 | 5.86E-04 | 1.63E-03 | Under-expressed |
| ZNF319    | -0.34 | 9.37E-04 | 2.46E-03 | Under-expressed |
| KTN1      | -0.34 | 1.05E-03 | 2.70E-03 | Under-expressed |
| UBQLN2    | -0.34 | 1.15E-03 | 2.93E-03 | Under-expressed |
| RELCH     | -0.34 | 1.15E-03 | 2.94E-03 | Under-expressed |
| SGPL1     | -0.34 | 1.16E-03 | 2.96E-03 | Under-expressed |
| CEP57L1   | -0.34 | 1.79E-03 | 4.33E-03 | Under-expressed |
| EIF3A     | -0.34 | 2.12E-03 | 5.02E-03 | Under-expressed |
| CASP7     | -0.34 | 2.63E-03 | 6.08E-03 | Under-expressed |
| ACOX3     | -0.34 | 2.67E-03 | 6.15E-03 | Under-expressed |
| CREBZF    | -0.34 | 3.54E-03 | 7.85E-03 | Under-expressed |
| DCTN6     | -0.34 | 4.08E-03 | 8.89E-03 | Under-expressed |
| GOLGA7    | -0.34 | 4.14E-03 | 9.01E-03 | Under-expressed |
| WASHC3    | -0.34 | 4.19E-03 | 9.10E-03 | Under-expressed |
| NARS2     | -0.34 | 4.30E-03 | 9.33E-03 | Under-expressed |
| TOPBP1    | -0.34 | 4.51E-03 | 9.73E-03 | Under-expressed |
| AHCTF1    | -0.34 | 4.67E-03 | 0.01     | Under-expressed |
| NADK      | -0.34 | 5.71E-03 | 0.0119   | Under-expressed |
| BBS2      | -0.34 | 7.05E-03 | 0.0144   | Under-expressed |
| RBFOX2    | -0.34 | 7.26E-03 | 0.0147   | Under-expressed |
| RFLNB     | -0.34 | 8.13E-03 | 0.0163   | Under-expressed |
| MED12     | -0.34 | 8.65E-03 | 0.0172   | Under-expressed |
| FOXRED2   | -0.34 | 8.88E-03 | 0.0176   | Under-expressed |
| ZNF45     | -0.34 | 8.88E-03 | 0.0176   | Under-expressed |
| TBC1D12   | -0.34 | 9.17E-03 | 0.0181   | Under-expressed |
| NCOR1     | -0.34 | 9.29E-03 | 0.0183   | Under-expressed |
| RAI14     | -0.34 | 9.74E-03 | 0.0191   | Under-expressed |
| SOWAHC    | -0.34 | 0.0104   | 0.0203   | Under-expressed |
| ZNF518A   | -0.34 | 0.0112   | 0.0216   | Under-expressed |
| SMURF2    | -0.34 | 0.0116   | 0.0222   | Under-expressed |
| TMEM245   | -0.34 | 0.014    | 0.0262   | Under-expressed |
| NR1D1     | -0.34 | 0.0141   | 0.0264   | Under-expressed |
| AFDN      | -0.34 | 0.0143   | 0.0266   | Under-expressed |
| PHF3      | -0.34 | 0.016    | 0.0294   | Under-expressed |
| PEX11A    | -0.34 | 0.0163   | 0.03     | Under-expressed |
| ZNF264    | -0.34 | 0.0169   | 0.0308   | Under-expressed |
| GIMAP4    | -0.34 | 0.0241   | 0.0423   | Under-expressed |
| MRPL19    | -0.35 | 5.43E-08 | 5.28E-07 | Under-expressed |
| TRAPPC6B  | -0.35 | 6.79E-07 | 4.60E-06 | Under-expressed |
| DCAF10    | -0.35 | 2.82E-06 | 1.55E-05 | Under-expressed |
| EIF5      | -0.35 | 6.49E-06 | 3.22E-05 | Under-expressed |
| PPP4R3A   | -0.35 | 2.33E-05 | 9.80E-05 | Under-expressed |
| RAF1      | -0.35 | 3.29E-05 | 1.33E-04 | Under-expressed |
| FAM76A    | -0.35 | 6.98E-05 | 2.55E-04 | Under-expressed |
| HINT3     | -0.35 | 1.01E-04 | 3.54E-04 | Under-expressed |
| ZC3H14    | -0.35 | 1.52E-04 | 5.06E-04 | Under-expressed |
| THAP5     | -0.35 | 1.79E-04 | 5.85E-04 | Under-expressed |
| AREL1     | -0.35 | 2.23E-04 | 7.06E-04 | Under-expressed |
| RBMXL1    | -0.35 | 3.13E-04 | 9.51E-04 | Under-expressed |
| ZNF747    | -0.35 | 3.42E-04 | 1.03E-03 | Under-expressed |
| PTCD2     | -0.35 | 3.47E-04 | 1.04E-03 | Under-expressed |
| PRR14L    | -0.35 | 4.03E-04 | 1.18E-03 | Under-expressed |

|           |       |          |          |                 |
|-----------|-------|----------|----------|-----------------|
| CAAP1     | -0.35 | 4.04E-04 | 1.18E-03 | Under-expressed |
| FBXL17    | -0.35 | 4.58E-04 | 1.32E-03 | Under-expressed |
| DLD       | -0.35 | 6.46E-04 | 1.78E-03 | Under-expressed |
| ALMS1     | -0.35 | 8.08E-04 | 2.17E-03 | Under-expressed |
| POGLUT1   | -0.35 | 8.20E-04 | 2.19E-03 | Under-expressed |
| JMY       | -0.35 | 8.81E-04 | 2.33E-03 | Under-expressed |
| B4GALT1   | -0.35 | 9.64E-04 | 2.52E-03 | Under-expressed |
| BRMS1L    | -0.35 | 9.77E-04 | 2.55E-03 | Under-expressed |
| FGFRL1    | -0.35 | 9.96E-04 | 2.59E-03 | Under-expressed |
| IGIP      | -0.35 | 1.20E-03 | 3.04E-03 | Under-expressed |
| UBE4B     | -0.35 | 1.55E-03 | 3.80E-03 | Under-expressed |
| AKIRIN1   | -0.35 | 1.55E-03 | 3.81E-03 | Under-expressed |
| PAN2      | -0.35 | 1.61E-03 | 3.93E-03 | Under-expressed |
| KIAA1671  | -0.35 | 2.39E-03 | 5.58E-03 | Under-expressed |
| ANKRD42   | -0.35 | 2.62E-03 | 6.05E-03 | Under-expressed |
| ARSA      | -0.35 | 3.97E-03 | 8.69E-03 | Under-expressed |
| KIAA1217  | -0.35 | 4.38E-03 | 9.48E-03 | Under-expressed |
| ARMCX5    | -0.35 | 4.85E-03 | 0.0104   | Under-expressed |
| DUSP7     | -0.35 | 4.98E-03 | 0.0106   | Under-expressed |
| PLXNB2    | -0.35 | 6.11E-03 | 0.0127   | Under-expressed |
| PRKD3     | -0.35 | 6.80E-03 | 0.0139   | Under-expressed |
| LINC00174 | -0.35 | 7.68E-03 | 0.0155   | Under-expressed |
| ZNF516    | -0.35 | 7.72E-03 | 0.0156   | Under-expressed |
| DNAJC27   | -0.35 | 7.90E-03 | 0.0159   | Under-expressed |
| HYLS1     | -0.35 | 8.22E-03 | 0.0165   | Under-expressed |
| MAP3K14   | -0.35 | 8.67E-03 | 0.0172   | Under-expressed |
| EXD2      | -0.35 | 9.44E-03 | 0.0186   | Under-expressed |
| FN3K      | -0.35 | 0.013    | 0.0245   | Under-expressed |
| RHOU      | -0.35 | 0.0134   | 0.0251   | Under-expressed |
| CCDC14    | -0.35 | 0.014    | 0.0262   | Under-expressed |
| KDM6A     | -0.35 | 0.0164   | 0.0301   | Under-expressed |
| MRPL39    | -0.35 | 0.0171   | 0.0311   | Under-expressed |
| ZNF92     | -0.35 | 0.0186   | 0.0336   | Under-expressed |
| NEMP1     | -0.35 | 0.0199   | 0.0357   | Under-expressed |
| LTB4R     | -0.35 | 0.0208   | 0.0371   | Under-expressed |
| LACTB2    | -0.35 | 0.0213   | 0.0378   | Under-expressed |
| ADNP      | -0.35 | 0.0262   | 0.0455   | Under-expressed |
| MBD4      | -0.36 | 8.44E-08 | 7.72E-07 | Under-expressed |
| SETX      | -0.36 | 1.54E-06 | 9.20E-06 | Under-expressed |
| ZMPSTE24  | -0.36 | 1.63E-06 | 9.68E-06 | Under-expressed |
| GCC1      | -0.36 | 2.18E-06 | 1.24E-05 | Under-expressed |
| TMBIM6    | -0.36 | 3.18E-06 | 1.72E-05 | Under-expressed |
| EPS15     | -0.36 | 5.67E-06 | 2.86E-05 | Under-expressed |
| CLCC1     | -0.36 | 7.99E-06 | 3.85E-05 | Under-expressed |
| USP8      | -0.36 | 8.25E-06 | 3.97E-05 | Under-expressed |
| PLEKHM1   | -0.36 | 8.91E-06 | 4.25E-05 | Under-expressed |
| TBC1D5    | -0.36 | 1.06E-05 | 4.94E-05 | Under-expressed |
| TMEM254   | -0.36 | 1.68E-05 | 7.37E-05 | Under-expressed |
| CEP350    | -0.36 | 4.41E-05 | 1.71E-04 | Under-expressed |
| RAB5A     | -0.36 | 4.97E-05 | 1.90E-04 | Under-expressed |
| SCYL3     | -0.36 | 5.93E-05 | 2.21E-04 | Under-expressed |
| RNF13     | -0.36 | 6.57E-05 | 2.42E-04 | Under-expressed |
| ARHGAP35  | -0.36 | 9.12E-05 | 3.23E-04 | Under-expressed |
| SIPA1L1   | -0.36 | 1.11E-04 | 3.84E-04 | Under-expressed |
| TBCCD1    | -0.36 | 1.39E-04 | 4.66E-04 | Under-expressed |
| CCDC50    | -0.36 | 1.43E-04 | 4.79E-04 | Under-expressed |
| KAT7      | -0.36 | 1.44E-04 | 4.82E-04 | Under-expressed |

|              |       |          |          |                 |
|--------------|-------|----------|----------|-----------------|
| SNX1         | -0.36 | 1.75E-04 | 5.74E-04 | Under-expressed |
| YME1L1       | -0.36 | 1.92E-04 | 6.22E-04 | Under-expressed |
| PLEKHA3      | -0.36 | 2.04E-04 | 6.55E-04 | Under-expressed |
| PPP2R5B      | -0.36 | 2.50E-04 | 7.80E-04 | Under-expressed |
| SUZ12        | -0.36 | 3.19E-04 | 9.65E-04 | Under-expressed |
| LOC100129034 | -0.36 | 3.34E-04 | 1.01E-03 | Under-expressed |
| LAMP1        | -0.36 | 3.58E-04 | 1.07E-03 | Under-expressed |
| WDR82        | -0.36 | 5.01E-04 | 1.43E-03 | Under-expressed |
| NPTN         | -0.36 | 5.19E-04 | 1.47E-03 | Under-expressed |
| RAB12        | -0.36 | 5.32E-04 | 1.50E-03 | Under-expressed |
| BRD2         | -0.36 | 6.12E-04 | 1.69E-03 | Under-expressed |
| CTNND1       | -0.36 | 6.52E-04 | 1.80E-03 | Under-expressed |
| ZNF823       | -0.36 | 7.93E-04 | 2.13E-03 | Under-expressed |
| LANCL1       | -0.36 | 8.27E-04 | 2.21E-03 | Under-expressed |
| NMRK1        | -0.36 | 8.50E-04 | 2.26E-03 | Under-expressed |
| TWF1         | -0.36 | 8.83E-04 | 2.34E-03 | Under-expressed |
| ARV1         | -0.36 | 9.07E-04 | 2.39E-03 | Under-expressed |
| GEN1         | -0.36 | 9.13E-04 | 2.41E-03 | Under-expressed |
| UPF2         | -0.36 | 9.53E-04 | 2.50E-03 | Under-expressed |
| PAFAH2       | -0.36 | 1.07E-03 | 2.75E-03 | Under-expressed |
| MAP3K7       | -0.36 | 1.78E-03 | 4.31E-03 | Under-expressed |
| PALB2        | -0.36 | 1.79E-03 | 4.32E-03 | Under-expressed |
| TASOR2       | -0.36 | 1.84E-03 | 4.42E-03 | Under-expressed |
| AGK          | -0.36 | 2.01E-03 | 4.78E-03 | Under-expressed |
| SIAH2        | -0.36 | 2.10E-03 | 4.99E-03 | Under-expressed |
| TRIM23       | -0.36 | 2.22E-03 | 5.23E-03 | Under-expressed |
| NXT2         | -0.36 | 2.57E-03 | 5.96E-03 | Under-expressed |
| ERI1         | -0.36 | 2.82E-03 | 6.46E-03 | Under-expressed |
| APMAP        | -0.36 | 2.85E-03 | 6.51E-03 | Under-expressed |
| SLC49A4      | -0.36 | 2.92E-03 | 6.65E-03 | Under-expressed |
| CTPS1        | -0.36 | 3.25E-03 | 7.31E-03 | Under-expressed |
| ABL1         | -0.36 | 3.77E-03 | 8.28E-03 | Under-expressed |
| HSPA13       | -0.36 | 4.07E-03 | 8.89E-03 | Under-expressed |
| TBC1D16      | -0.36 | 5.14E-03 | 0.0109   | Under-expressed |
| BAZ2B        | -0.36 | 5.67E-03 | 0.0119   | Under-expressed |
| GNB5         | -0.36 | 6.60E-03 | 0.0136   | Under-expressed |
| ACVR1B       | -0.36 | 7.58E-03 | 0.0153   | Under-expressed |
| SPIN3        | -0.36 | 7.73E-03 | 0.0156   | Under-expressed |
| BRPF3        | -0.36 | 7.98E-03 | 0.016    | Under-expressed |
| RAB6C        | -0.36 | 9.65E-03 | 0.0189   | Under-expressed |
| STK38L       | -0.36 | 0.0104   | 0.0202   | Under-expressed |
| KLHL21       | -0.36 | 0.011    | 0.0212   | Under-expressed |
| MAGI3        | -0.36 | 0.0111   | 0.0215   | Under-expressed |
| KIAA0040     | -0.36 | 0.0112   | 0.0216   | Under-expressed |
| BCDIN3D-AS1  | -0.36 | 0.0116   | 0.0222   | Under-expressed |
| TJP2         | -0.36 | 0.0125   | 0.0238   | Under-expressed |
| MAP4K5       | -0.36 | 0.0164   | 0.03     | Under-expressed |
| SMIM19       | -0.36 | 0.0213   | 0.038    | Under-expressed |
| IFNGR1       | -0.36 | 0.0247   | 0.0433   | Under-expressed |
| SLC35G1      | -0.36 | 0.0253   | 0.0441   | Under-expressed |
| BTBD6        | -0.36 | 0.0279   | 0.0482   | Under-expressed |
| NAPEPLD      | -0.37 | 1.16E-06 | 7.24E-06 | Under-expressed |
| DCUN1D4      | -0.37 | 1.52E-05 | 6.75E-05 | Under-expressed |
| LARP7        | -0.37 | 2.16E-05 | 9.19E-05 | Under-expressed |
| PHKB         | -0.37 | 2.61E-05 | 1.09E-04 | Under-expressed |
| NMD3         | -0.37 | 3.14E-05 | 1.27E-04 | Under-expressed |
| SPTY2D1      | -0.37 | 3.65E-05 | 1.45E-04 | Under-expressed |

|          |       |          |          |                 |
|----------|-------|----------|----------|-----------------|
| LIN7C    | -0.37 | 4.94E-05 | 1.89E-04 | Under-expressed |
| TRAPPC10 | -0.37 | 5.91E-05 | 2.21E-04 | Under-expressed |
| POFUT1   | -0.37 | 6.62E-05 | 2.44E-04 | Under-expressed |
| CLDND1   | -0.37 | 8.17E-05 | 2.94E-04 | Under-expressed |
| CAST     | -0.37 | 8.71E-05 | 3.11E-04 | Under-expressed |
| STIM2    | -0.37 | 9.02E-05 | 3.20E-04 | Under-expressed |
| OMA1     | -0.37 | 1.23E-04 | 4.22E-04 | Under-expressed |
| ALS2     | -0.37 | 1.37E-04 | 4.62E-04 | Under-expressed |
| MFN1     | -0.37 | 1.46E-04 | 4.88E-04 | Under-expressed |
| RNF115   | -0.37 | 1.76E-04 | 5.77E-04 | Under-expressed |
| GDAP2    | -0.37 | 2.41E-04 | 7.56E-04 | Under-expressed |
| CDK13    | -0.37 | 2.77E-04 | 8.52E-04 | Under-expressed |
| NUP58    | -0.37 | 2.96E-04 | 9.04E-04 | Under-expressed |
| SUCLA2   | -0.37 | 3.97E-04 | 1.17E-03 | Under-expressed |
| TUBGCP3  | -0.37 | 4.06E-04 | 1.19E-03 | Under-expressed |
| LRRC8D   | -0.37 | 4.61E-04 | 1.33E-03 | Under-expressed |
| ZNF500   | -0.37 | 6.53E-04 | 1.80E-03 | Under-expressed |
| ZCCHC4   | -0.37 | 6.82E-04 | 1.87E-03 | Under-expressed |
| PRDX3    | -0.37 | 7.23E-04 | 1.96E-03 | Under-expressed |
| COPA     | -0.37 | 7.49E-04 | 2.03E-03 | Under-expressed |
| PER2     | -0.37 | 9.45E-04 | 2.48E-03 | Under-expressed |
| GON4L    | -0.37 | 9.61E-04 | 2.52E-03 | Under-expressed |
| CRADD    | -0.37 | 9.89E-04 | 2.58E-03 | Under-expressed |
| TOP1     | -0.37 | 1.08E-03 | 2.78E-03 | Under-expressed |
| PLPP6    | -0.37 | 1.52E-03 | 3.75E-03 | Under-expressed |
| PDLIM2   | -0.37 | 1.53E-03 | 3.77E-03 | Under-expressed |
| TPCN2    | -0.37 | 1.60E-03 | 3.92E-03 | Under-expressed |
| ZNF782   | -0.37 | 1.61E-03 | 3.93E-03 | Under-expressed |
| ATL3     | -0.37 | 1.76E-03 | 4.26E-03 | Under-expressed |
| PPIL4    | -0.37 | 1.81E-03 | 4.37E-03 | Under-expressed |
| CBLB     | -0.37 | 1.87E-03 | 4.48E-03 | Under-expressed |
| ZBTB49   | -0.37 | 1.89E-03 | 4.54E-03 | Under-expressed |
| ZC3H7A   | -0.37 | 1.97E-03 | 4.70E-03 | Under-expressed |
| SMPD1    | -0.37 | 2.32E-03 | 5.44E-03 | Under-expressed |
| SRPK2    | -0.37 | 2.39E-03 | 5.57E-03 | Under-expressed |
| COPB1    | -0.37 | 2.42E-03 | 5.63E-03 | Under-expressed |
| SRGAP2   | -0.37 | 2.55E-03 | 5.90E-03 | Under-expressed |
| BPTF     | -0.37 | 2.71E-03 | 6.23E-03 | Under-expressed |
| TPST2    | -0.37 | 3.18E-03 | 7.16E-03 | Under-expressed |
| OSBPL9   | -0.37 | 3.43E-03 | 7.65E-03 | Under-expressed |
| PGAM5    | -0.37 | 4.88E-03 | 0.0104   | Under-expressed |
| SCLT1    | -0.37 | 6.43E-03 | 0.0133   | Under-expressed |
| ADAM15   | -0.37 | 6.85E-03 | 0.014    | Under-expressed |
| SEC61A2  | -0.37 | 6.98E-03 | 0.0143   | Under-expressed |
| STAG3L3  | -0.37 | 0.0102   | 0.0198   | Under-expressed |
| ZBTB8A   | -0.37 | 0.0118   | 0.0225   | Under-expressed |
| B2M      | -0.37 | 0.0127   | 0.0241   | Under-expressed |
| IGSF8    | -0.37 | 0.016    | 0.0294   | Under-expressed |
| MCAM     | -0.37 | 0.0164   | 0.0301   | Under-expressed |
| PPP1R3D  | -0.37 | 0.0185   | 0.0334   | Under-expressed |
| KLF6     | -0.37 | 0.0244   | 0.0429   | Under-expressed |
| SPARC    | -0.37 | 0.0258   | 0.0449   | Under-expressed |
| IDI1     | -0.37 | 0.0272   | 0.0472   | Under-expressed |
| NEAT1    | -0.37 | 0.0286   | 0.0493   | Under-expressed |
| UBQLN1   | -0.38 | 8.27E-09 | 1.04E-07 | Under-expressed |
| TAOK2    | -0.38 | 1.06E-06 | 6.71E-06 | Under-expressed |
| TSPYL1   | -0.38 | 5.95E-06 | 2.99E-05 | Under-expressed |

|           |       |          |          |                 |
|-----------|-------|----------|----------|-----------------|
| FAN1      | -0.38 | 6.04E-06 | 3.02E-05 | Under-expressed |
| TBC1D9B   | -0.38 | 1.85E-05 | 8.02E-05 | Under-expressed |
| CDC40     | -0.38 | 2.50E-05 | 1.05E-04 | Under-expressed |
| SON       | -0.38 | 2.78E-05 | 1.14E-04 | Under-expressed |
| SDHC      | -0.38 | 3.02E-05 | 1.23E-04 | Under-expressed |
| FBXO28    | -0.38 | 3.49E-05 | 1.40E-04 | Under-expressed |
| OXNAD1    | -0.38 | 3.57E-05 | 1.43E-04 | Under-expressed |
| PHACTR4   | -0.38 | 5.41E-05 | 2.05E-04 | Under-expressed |
| UACA      | -0.38 | 6.16E-05 | 2.29E-04 | Under-expressed |
| SRRM2     | -0.38 | 8.81E-05 | 3.14E-04 | Under-expressed |
| DDX3X     | -0.38 | 1.15E-04 | 3.97E-04 | Under-expressed |
| MTMR10    | -0.38 | 1.42E-04 | 4.76E-04 | Under-expressed |
| ZNF407    | -0.38 | 1.46E-04 | 4.88E-04 | Under-expressed |
| FBXL4     | -0.38 | 1.83E-04 | 5.97E-04 | Under-expressed |
| EHMT1     | -0.38 | 2.03E-04 | 6.53E-04 | Under-expressed |
| MOCS2     | -0.38 | 2.56E-04 | 7.97E-04 | Under-expressed |
| MCEE      | -0.38 | 2.65E-04 | 8.20E-04 | Under-expressed |
| GOPC      | -0.38 | 3.11E-04 | 9.45E-04 | Under-expressed |
| ACTR2     | -0.38 | 3.19E-04 | 9.65E-04 | Under-expressed |
| IARS2     | -0.38 | 3.20E-04 | 9.69E-04 | Under-expressed |
| AGPAT3    | -0.38 | 3.27E-04 | 9.87E-04 | Under-expressed |
| PI4KA     | -0.38 | 3.47E-04 | 1.04E-03 | Under-expressed |
| STRN3     | -0.38 | 3.83E-04 | 1.13E-03 | Under-expressed |
| KDM4C     | -0.38 | 4.62E-04 | 1.33E-03 | Under-expressed |
| HTATSF1   | -0.38 | 5.18E-04 | 1.47E-03 | Under-expressed |
| DGKQ      | -0.38 | 6.34E-04 | 1.75E-03 | Under-expressed |
| DNAJC28   | -0.38 | 1.07E-03 | 2.76E-03 | Under-expressed |
| DIPK2B    | -0.38 | 1.11E-03 | 2.85E-03 | Under-expressed |
| ADARB1    | -0.38 | 1.39E-03 | 3.47E-03 | Under-expressed |
| ZNF17     | -0.38 | 1.58E-03 | 3.88E-03 | Under-expressed |
| LRBA      | -0.38 | 2.97E-03 | 6.75E-03 | Under-expressed |
| KIF21A    | -0.38 | 3.22E-03 | 7.25E-03 | Under-expressed |
| ITPK1     | -0.38 | 3.43E-03 | 7.64E-03 | Under-expressed |
| CTDSPL2   | -0.38 | 3.88E-03 | 8.50E-03 | Under-expressed |
| CRAMP1    | -0.38 | 4.08E-03 | 8.90E-03 | Under-expressed |
| SIGMAR1   | -0.38 | 4.19E-03 | 9.10E-03 | Under-expressed |
| FH        | -0.38 | 4.67E-03 | 0.01     | Under-expressed |
| TIGAR     | -0.38 | 5.89E-03 | 0.0123   | Under-expressed |
| TNFRSF10B | -0.38 | 6.60E-03 | 0.0136   | Under-expressed |
| EXOC3L1   | -0.38 | 7.00E-03 | 0.0143   | Under-expressed |
| EEPD1     | -0.38 | 7.10E-03 | 0.0145   | Under-expressed |
| RFC3      | -0.38 | 9.12E-03 | 0.018    | Under-expressed |
| CRLF3     | -0.38 | 9.71E-03 | 0.019    | Under-expressed |
| ANXA6     | -0.38 | 9.93E-03 | 0.0194   | Under-expressed |
| SPRY4     | -0.38 | 0.0107   | 0.0206   | Under-expressed |
| TPK1      | -0.38 | 0.0115   | 0.0221   | Under-expressed |
| SMPDL3A   | -0.38 | 0.0133   | 0.0251   | Under-expressed |
| TFCP2     | -0.38 | 0.0171   | 0.0312   | Under-expressed |
| CASK      | -0.38 | 0.0188   | 0.034    | Under-expressed |
| TREX1     | -0.38 | 0.0269   | 0.0467   | Under-expressed |
| RNF123    | -0.39 | 6.30E-08 | 5.98E-07 | Under-expressed |
| SEC62     | -0.39 | 1.04E-07 | 9.23E-07 | Under-expressed |
| ZBTB14    | -0.39 | 6.03E-07 | 4.15E-06 | Under-expressed |
| TRIM26    | -0.39 | 4.52E-06 | 2.35E-05 | Under-expressed |
| ITCH      | -0.39 | 7.19E-06 | 3.52E-05 | Under-expressed |
| ZSWIM8    | -0.39 | 7.91E-06 | 3.82E-05 | Under-expressed |
| HNRNP2    | -0.39 | 8.86E-06 | 4.23E-05 | Under-expressed |

|           |       |          |          |                 |
|-----------|-------|----------|----------|-----------------|
| COX18     | -0.39 | 9.47E-06 | 4.48E-05 | Under-expressed |
| PIGN      | -0.39 | 1.06E-05 | 4.94E-05 | Under-expressed |
| NSUN3     | -0.39 | 1.14E-05 | 5.28E-05 | Under-expressed |
| SRRM1     | -0.39 | 1.62E-05 | 7.16E-05 | Under-expressed |
| TOP1P1    | -0.39 | 1.63E-05 | 7.17E-05 | Under-expressed |
| SLC30A7   | -0.39 | 1.64E-05 | 7.23E-05 | Under-expressed |
| STAM2     | -0.39 | 1.78E-05 | 7.73E-05 | Under-expressed |
| USP9X     | -0.39 | 2.05E-05 | 8.77E-05 | Under-expressed |
| YY1       | -0.39 | 2.16E-05 | 9.18E-05 | Under-expressed |
| MAGT1     | -0.39 | 2.46E-05 | 1.03E-04 | Under-expressed |
| FAM114A2  | -0.39 | 3.98E-05 | 1.57E-04 | Under-expressed |
| RAB18     | -0.39 | 4.08E-05 | 1.60E-04 | Under-expressed |
| PTPRJ     | -0.39 | 5.03E-05 | 1.92E-04 | Under-expressed |
| PLBD2     | -0.39 | 5.33E-05 | 2.02E-04 | Under-expressed |
| LRRFIP1   | -0.39 | 6.27E-05 | 2.33E-04 | Under-expressed |
| PRKAR1A   | -0.39 | 7.49E-05 | 2.72E-04 | Under-expressed |
| RWDD2B    | -0.39 | 1.10E-04 | 3.82E-04 | Under-expressed |
| FNIP1     | -0.39 | 1.20E-04 | 4.11E-04 | Under-expressed |
| SLX4      | -0.39 | 1.74E-04 | 5.70E-04 | Under-expressed |
| ERCC6     | -0.39 | 1.98E-04 | 6.37E-04 | Under-expressed |
| MTRR      | -0.39 | 1.98E-04 | 6.40E-04 | Under-expressed |
| MTF1      | -0.39 | 2.68E-04 | 8.27E-04 | Under-expressed |
| USP13     | -0.39 | 3.94E-04 | 1.16E-03 | Under-expressed |
| TRIM14    | -0.39 | 4.04E-04 | 1.18E-03 | Under-expressed |
| UAP1      | -0.39 | 5.19E-04 | 1.47E-03 | Under-expressed |
| SCAF11    | -0.39 | 7.14E-04 | 1.94E-03 | Under-expressed |
| KIAA0355  | -0.39 | 1.04E-03 | 2.70E-03 | Under-expressed |
| CDK17     | -0.39 | 1.14E-03 | 2.91E-03 | Under-expressed |
| USP45     | -0.39 | 1.41E-03 | 3.51E-03 | Under-expressed |
| RAD50     | -0.39 | 1.52E-03 | 3.75E-03 | Under-expressed |
| RAB8B     | -0.39 | 1.60E-03 | 3.92E-03 | Under-expressed |
| LRRC8C    | -0.39 | 1.82E-03 | 4.37E-03 | Under-expressed |
| NFKBIA    | -0.39 | 1.97E-03 | 4.70E-03 | Under-expressed |
| PLEKHH3   | -0.39 | 1.98E-03 | 4.72E-03 | Under-expressed |
| JADE3     | -0.39 | 1.98E-03 | 4.72E-03 | Under-expressed |
| ZMYM5     | -0.39 | 2.86E-03 | 6.54E-03 | Under-expressed |
| ING3      | -0.39 | 2.87E-03 | 6.56E-03 | Under-expressed |
| ESAM      | -0.39 | 2.97E-03 | 6.74E-03 | Under-expressed |
| ASAH1     | -0.39 | 3.07E-03 | 6.94E-03 | Under-expressed |
| PCTP      | -0.39 | 3.87E-03 | 8.48E-03 | Under-expressed |
| STIMATE   | -0.39 | 4.30E-03 | 9.33E-03 | Under-expressed |
| PFKFB2    | -0.39 | 4.31E-03 | 9.34E-03 | Under-expressed |
| DNHD1     | -0.39 | 4.90E-03 | 0.0105   | Under-expressed |
| CEP85     | -0.39 | 5.25E-03 | 0.0111   | Under-expressed |
| ERAP1     | -0.39 | 6.44E-03 | 0.0133   | Under-expressed |
| TEF       | -0.39 | 7.24E-03 | 0.0147   | Under-expressed |
| LMNTD2    | -0.39 | 7.71E-03 | 0.0156   | Under-expressed |
| LINC01000 | -0.39 | 8.75E-03 | 0.0174   | Under-expressed |
| NRROS     | -0.39 | 9.76E-03 | 0.0191   | Under-expressed |
| HERC2P2   | -0.39 | 0.0116   | 0.0223   | Under-expressed |
| ZNF615    | -0.39 | 0.0121   | 0.0231   | Under-expressed |
| TTC30A    | -0.39 | 0.0125   | 0.0237   | Under-expressed |
| ZNF304    | -0.39 | 0.0125   | 0.0237   | Under-expressed |
| MYO6      | -0.39 | 0.0132   | 0.0248   | Under-expressed |
| MAP3K10   | -0.39 | 0.0152   | 0.0281   | Under-expressed |
| RBBP8     | -0.39 | 0.0161   | 0.0296   | Under-expressed |
| PRPS2     | -0.39 | 0.0165   | 0.0302   | Under-expressed |



|          |       |          |          |                 |
|----------|-------|----------|----------|-----------------|
| CHST15   | -0.39 | 0.0166   | 0.0304   | Under-expressed |
| INPP1    | -0.39 | 0.0181   | 0.0328   | Under-expressed |
| ELL2     | -0.39 | 0.0215   | 0.0382   | Under-expressed |
| NHLRC1   | -0.39 | 0.0238   | 0.0419   | Under-expressed |
| SLC4A7   | -0.39 | 0.0259   | 0.0451   | Under-expressed |
| FPR3     | -0.39 | 0.0276   | 0.0477   | Under-expressed |
| FBF1     | -0.39 | 0.0283   | 0.0488   | Under-expressed |
| RMDN3    | -0.4  | 7.37E-09 | 9.48E-08 | Under-expressed |
| ZSCAN32  | -0.4  | 2.14E-07 | 1.71E-06 | Under-expressed |
| DCAF8    | -0.4  | 4.20E-07 | 3.04E-06 | Under-expressed |
| DCAF1    | -0.4  | 1.56E-06 | 9.34E-06 | Under-expressed |
| UBR7     | -0.4  | 1.89E-06 | 1.10E-05 | Under-expressed |
| STAT5B   | -0.4  | 4.39E-06 | 2.30E-05 | Under-expressed |
| MED13    | -0.4  | 4.52E-06 | 2.35E-05 | Under-expressed |
| SERINC3  | -0.4  | 4.59E-06 | 2.38E-05 | Under-expressed |
| AKT1     | -0.4  | 8.59E-06 | 4.12E-05 | Under-expressed |
| TMEM30A  | -0.4  | 1.38E-05 | 6.20E-05 | Under-expressed |
| DLST     | -0.4  | 2.46E-05 | 1.03E-04 | Under-expressed |
| USP33    | -0.4  | 2.75E-05 | 1.14E-04 | Under-expressed |
| TMTC3    | -0.4  | 2.76E-05 | 1.14E-04 | Under-expressed |
| AFG3L2   | -0.4  | 2.88E-05 | 1.18E-04 | Under-expressed |
| ATXN3    | -0.4  | 4.25E-05 | 1.66E-04 | Under-expressed |
| HBP1     | -0.4  | 4.88E-05 | 1.87E-04 | Under-expressed |
| ANKRD28  | -0.4  | 6.78E-05 | 2.49E-04 | Under-expressed |
| PRPS1    | -0.4  | 9.66E-05 | 3.40E-04 | Under-expressed |
| ZNF721   | -0.4  | 1.03E-04 | 3.61E-04 | Under-expressed |
| TMEM19   | -0.4  | 1.31E-04 | 4.46E-04 | Under-expressed |
| RAB2B    | -0.4  | 1.38E-04 | 4.65E-04 | Under-expressed |
| TUBGCP4  | -0.4  | 3.05E-04 | 9.29E-04 | Under-expressed |
| LBX2-AS1 | -0.4  | 3.22E-04 | 9.73E-04 | Under-expressed |
| MAP2K1   | -0.4  | 3.55E-04 | 1.06E-03 | Under-expressed |
| CLASP1   | -0.4  | 4.06E-04 | 1.19E-03 | Under-expressed |
| ELK4     | -0.4  | 5.58E-04 | 1.57E-03 | Under-expressed |
| PUS7L    | -0.4  | 5.73E-04 | 1.60E-03 | Under-expressed |
| ZBTB44   | -0.4  | 5.98E-04 | 1.66E-03 | Under-expressed |
| APAF1    | -0.4  | 6.39E-04 | 1.76E-03 | Under-expressed |
| ATRX     | -0.4  | 7.32E-04 | 1.99E-03 | Under-expressed |
| FAM13B   | -0.4  | 7.41E-04 | 2.01E-03 | Under-expressed |
| DHX40    | -0.4  | 7.53E-04 | 2.04E-03 | Under-expressed |
| HYOU1    | -0.4  | 8.61E-04 | 2.29E-03 | Under-expressed |
| SGMS1    | -0.4  | 8.81E-04 | 2.33E-03 | Under-expressed |
| EPC2     | -0.4  | 9.29E-04 | 2.44E-03 | Under-expressed |
| SEC23IP  | -0.4  | 1.01E-03 | 2.61E-03 | Under-expressed |
| CFAP97   | -0.4  | 1.27E-03 | 3.19E-03 | Under-expressed |
| SMCHD1   | -0.4  | 1.47E-03 | 3.64E-03 | Under-expressed |
| NCKAP1   | -0.4  | 1.65E-03 | 4.02E-03 | Under-expressed |
| NFKB1    | -0.4  | 1.83E-03 | 4.39E-03 | Under-expressed |
| MTSS2    | -0.4  | 2.16E-03 | 5.12E-03 | Under-expressed |
| ARHGEF40 | -0.4  | 2.19E-03 | 5.17E-03 | Under-expressed |
| KANSL1   | -0.4  | 2.59E-03 | 5.99E-03 | Under-expressed |
| TSC22D1  | -0.4  | 2.60E-03 | 6.02E-03 | Under-expressed |
| ZNF442   | -0.4  | 2.92E-03 | 6.64E-03 | Under-expressed |
| NDE1     | -0.4  | 2.99E-03 | 6.78E-03 | Under-expressed |
| DIAPH2   | -0.4  | 3.06E-03 | 6.92E-03 | Under-expressed |
| RBM23    | -0.4  | 3.33E-03 | 7.46E-03 | Under-expressed |
| PTER     | -0.4  | 3.52E-03 | 7.83E-03 | Under-expressed |
| MFSD14B  | -0.4  | 3.77E-03 | 8.28E-03 | Under-expressed |

|                 |       |          |          |                 |
|-----------------|-------|----------|----------|-----------------|
| PHLDB2          | -0.4  | 4.64E-03 | 9.98E-03 | Under-expressed |
| ZNF253          | -0.4  | 5.09E-03 | 0.0108   | Under-expressed |
| FLI1            | -0.4  | 5.38E-03 | 0.0113   | Under-expressed |
| LRIF1           | -0.4  | 6.22E-03 | 0.0129   | Under-expressed |
| ZNF765          | -0.4  | 8.29E-03 | 0.0166   | Under-expressed |
| WWC3            | -0.4  | 8.92E-03 | 0.0177   | Under-expressed |
| MSRA            | -0.4  | 9.27E-03 | 0.0183   | Under-expressed |
| FLVCR2          | -0.4  | 0.0109   | 0.0211   | Under-expressed |
| VEGFC           | -0.4  | 0.0129   | 0.0243   | Under-expressed |
| FAM98B          | -0.4  | 0.0138   | 0.0259   | Under-expressed |
| ATP11A          | -0.4  | 0.0144   | 0.0268   | Under-expressed |
| TMPPE           | -0.4  | 0.0148   | 0.0275   | Under-expressed |
| AGPAT5          | -0.4  | 0.0168   | 0.0307   | Under-expressed |
| FUT10           | -0.4  | 0.0172   | 0.0313   | Under-expressed |
| KCTD12          | -0.4  | 0.0204   | 0.0365   | Under-expressed |
| PDXDC2P-NPIP14P | -0.4  | 0.0233   | 0.0411   | Under-expressed |
| ANXA7           | -0.41 | 1.52E-08 | 1.76E-07 | Under-expressed |
| EIF4G1          | -0.41 | 1.04E-07 | 9.26E-07 | Under-expressed |
| PDCD6IP         | -0.41 | 1.13E-07 | 9.91E-07 | Under-expressed |
| LARP4           | -0.41 | 2.21E-07 | 1.76E-06 | Under-expressed |
| AP1G1           | -0.41 | 2.82E-07 | 2.17E-06 | Under-expressed |
| NUMB            | -0.41 | 3.66E-07 | 2.69E-06 | Under-expressed |
| AZI2            | -0.41 | 4.12E-07 | 2.99E-06 | Under-expressed |
| RAD23B          | -0.41 | 1.07E-06 | 6.79E-06 | Under-expressed |
| SLC38A10        | -0.41 | 2.13E-06 | 1.22E-05 | Under-expressed |
| SIKE1           | -0.41 | 2.51E-06 | 1.40E-05 | Under-expressed |
| GFM2            | -0.41 | 6.81E-06 | 3.35E-05 | Under-expressed |
| EVI5L           | -0.41 | 8.22E-06 | 3.95E-05 | Under-expressed |
| CASKIN2         | -0.41 | 1.90E-05 | 8.16E-05 | Under-expressed |
| ZBTB11          | -0.41 | 2.83E-05 | 1.16E-04 | Under-expressed |
| NSMCE3          | -0.41 | 3.53E-05 | 1.41E-04 | Under-expressed |
| CLEC16A         | -0.41 | 5.95E-05 | 2.22E-04 | Under-expressed |
| RARA            | -0.41 | 6.47E-05 | 2.39E-04 | Under-expressed |
| TCAIM           | -0.41 | 7.88E-05 | 2.85E-04 | Under-expressed |
| SOS1            | -0.41 | 8.93E-05 | 3.17E-04 | Under-expressed |
| RBM41           | -0.41 | 8.99E-05 | 3.19E-04 | Under-expressed |
| HIBCH           | -0.41 | 9.53E-05 | 3.36E-04 | Under-expressed |
| PARP4           | -0.41 | 9.82E-05 | 3.45E-04 | Under-expressed |
| GNPTAB          | -0.41 | 1.19E-04 | 4.08E-04 | Under-expressed |
| GTF2IRD2        | -0.41 | 1.54E-04 | 5.12E-04 | Under-expressed |
| NDFIP2          | -0.41 | 2.10E-04 | 6.70E-04 | Under-expressed |
| EIF2AK2         | -0.41 | 2.11E-04 | 6.73E-04 | Under-expressed |
| ZNF318          | -0.41 | 2.71E-04 | 8.36E-04 | Under-expressed |
| ZNF616          | -0.41 | 2.92E-04 | 8.92E-04 | Under-expressed |
| FBXO48          | -0.41 | 2.95E-04 | 9.02E-04 | Under-expressed |
| UVSSA           | -0.41 | 3.40E-04 | 1.02E-03 | Under-expressed |
| DCAF17          | -0.41 | 3.79E-04 | 1.12E-03 | Under-expressed |
| BRCC3           | -0.41 | 4.63E-04 | 1.34E-03 | Under-expressed |
| NAF1            | -0.41 | 5.65E-04 | 1.58E-03 | Under-expressed |
| MTMR4           | -0.41 | 7.13E-04 | 1.94E-03 | Under-expressed |
| TRIM66          | -0.41 | 7.44E-04 | 2.02E-03 | Under-expressed |
| GOLPH3          | -0.41 | 1.30E-03 | 3.26E-03 | Under-expressed |
| RGCC            | -0.41 | 1.54E-03 | 3.78E-03 | Under-expressed |
| ZNF280D         | -0.41 | 1.56E-03 | 3.83E-03 | Under-expressed |
| ZNF621          | -0.41 | 1.73E-03 | 4.20E-03 | Under-expressed |
| SH3BP2          | -0.41 | 1.83E-03 | 4.39E-03 | Under-expressed |
| ASPRV1          | -0.41 | 2.68E-03 | 6.17E-03 | Under-expressed |

|                 |       |          |          |                 |
|-----------------|-------|----------|----------|-----------------|
| ZNF697          | -0.41 | 3.19E-03 | 7.19E-03 | Under-expressed |
| SMC2            | -0.41 | 3.85E-03 | 8.45E-03 | Under-expressed |
| LRRC70          | -0.41 | 4.46E-03 | 9.62E-03 | Under-expressed |
| ANKHD1-EIF4EBP3 | -0.41 | 5.04E-03 | 0.0107   | Under-expressed |
| RAPGEF3         | -0.41 | 5.68E-03 | 0.0119   | Under-expressed |
| BBS1            | -0.41 | 7.27E-03 | 0.0148   | Under-expressed |
| JUN             | -0.41 | 7.30E-03 | 0.0148   | Under-expressed |
| SOX17           | -0.41 | 0.014    | 0.0261   | Under-expressed |
| SLC66A3         | -0.41 | 0.0189   | 0.0341   | Under-expressed |
| MAP1B           | -0.41 | 0.025    | 0.0438   | Under-expressed |
| ASAP2           | -0.41 | 0.0251   | 0.0438   | Under-expressed |
| CDKN2B          | -0.41 | 0.0281   | 0.0485   | Under-expressed |
| NAA30           | -0.42 | 9.67E-08 | 8.69E-07 | Under-expressed |
| PLAA            | -0.42 | 1.02E-07 | 9.10E-07 | Under-expressed |
| PPP3R1          | -0.42 | 2.97E-07 | 2.26E-06 | Under-expressed |
| DCAF5           | -0.42 | 4.31E-07 | 3.10E-06 | Under-expressed |
| EEF2K           | -0.42 | 7.19E-07 | 4.83E-06 | Under-expressed |
| GSK3B           | -0.42 | 7.49E-07 | 4.99E-06 | Under-expressed |
| DCUN1D3         | -0.42 | 7.82E-06 | 3.79E-05 | Under-expressed |
| TRIM37          | -0.42 | 1.18E-05 | 5.42E-05 | Under-expressed |
| VPS36           | -0.42 | 5.11E-05 | 1.95E-04 | Under-expressed |
| NUMA1           | -0.42 | 5.48E-05 | 2.07E-04 | Under-expressed |
| SHQ1            | -0.42 | 6.31E-05 | 2.34E-04 | Under-expressed |
| LIPA            | -0.42 | 7.24E-05 | 2.64E-04 | Under-expressed |
| ZNF644          | -0.42 | 7.86E-05 | 2.84E-04 | Under-expressed |
| CEP170B         | -0.42 | 9.29E-05 | 3.29E-04 | Under-expressed |
| EAF1            | -0.42 | 1.19E-04 | 4.07E-04 | Under-expressed |
| FBXO38          | -0.42 | 1.20E-04 | 4.11E-04 | Under-expressed |
| CREBL2          | -0.42 | 1.39E-04 | 4.67E-04 | Under-expressed |
| R3HDM2          | -0.42 | 1.68E-04 | 5.51E-04 | Under-expressed |
| ZNF770          | -0.42 | 1.91E-04 | 6.21E-04 | Under-expressed |
| RAB23           | -0.42 | 2.50E-04 | 7.80E-04 | Under-expressed |
| F8A1            | -0.42 | 3.06E-04 | 9.31E-04 | Under-expressed |
| ZNF484          | -0.42 | 3.16E-04 | 9.59E-04 | Under-expressed |
| TTC33           | -0.42 | 3.46E-04 | 1.04E-03 | Under-expressed |
| STAG2           | -0.42 | 4.34E-04 | 1.26E-03 | Under-expressed |
| MAT2B           | -0.42 | 4.43E-04 | 1.28E-03 | Under-expressed |
| NCSTN           | -0.42 | 4.45E-04 | 1.29E-03 | Under-expressed |
| MMACHC          | -0.42 | 4.78E-04 | 1.37E-03 | Under-expressed |
| GNA12           | -0.42 | 6.77E-04 | 1.86E-03 | Under-expressed |
| LMBRD1          | -0.42 | 7.87E-04 | 2.12E-03 | Under-expressed |
| ZNF37A          | -0.42 | 9.52E-04 | 2.50E-03 | Under-expressed |
| DMXL2           | -0.42 | 1.02E-03 | 2.65E-03 | Under-expressed |
| FOXJ2           | -0.42 | 1.08E-03 | 2.78E-03 | Under-expressed |
| DENND4A         | -0.42 | 1.56E-03 | 3.84E-03 | Under-expressed |
| PREX1           | -0.42 | 1.59E-03 | 3.90E-03 | Under-expressed |
| ATP7A           | -0.42 | 1.69E-03 | 4.11E-03 | Under-expressed |
| MAF             | -0.42 | 1.71E-03 | 4.16E-03 | Under-expressed |
| C16ORF87        | -0.42 | 2.69E-03 | 6.20E-03 | Under-expressed |
| BCL6B           | -0.42 | 3.07E-03 | 6.94E-03 | Under-expressed |
| PRKAB2          | -0.42 | 3.42E-03 | 7.63E-03 | Under-expressed |
| ZNF224          | -0.42 | 3.44E-03 | 7.67E-03 | Under-expressed |
| BMP2K           | -0.42 | 3.68E-03 | 8.11E-03 | Under-expressed |
| DNASE2          | -0.42 | 4.52E-03 | 9.75E-03 | Under-expressed |
| TRIQK           | -0.42 | 4.69E-03 | 0.0101   | Under-expressed |
| QDPR            | -0.42 | 5.47E-03 | 0.0115   | Under-expressed |
| PHACTR2         | -0.42 | 5.69E-03 | 0.0119   | Under-expressed |

|           |       |          |          |                 |
|-----------|-------|----------|----------|-----------------|
| NACC2     | -0.42 | 5.74E-03 | 0.012    | Under-expressed |
| DDHD2     | -0.42 | 5.81E-03 | 0.0121   | Under-expressed |
| LONRF1    | -0.42 | 8.89E-03 | 0.0176   | Under-expressed |
| DUSP6     | -0.42 | 9.14E-03 | 0.0181   | Under-expressed |
| TTC7B     | -0.42 | 0.0101   | 0.0198   | Under-expressed |
| PLK2      | -0.42 | 0.0115   | 0.022    | Under-expressed |
| HIVEP3    | -0.42 | 0.0128   | 0.0242   | Under-expressed |
| FAH       | -0.42 | 0.013    | 0.0245   | Under-expressed |
| ZBED3     | -0.42 | 0.0156   | 0.0288   | Under-expressed |
| CBL       | -0.42 | 0.0161   | 0.0297   | Under-expressed |
| ZNF597    | -0.42 | 0.017    | 0.031    | Under-expressed |
| TRIM52    | -0.42 | 0.0197   | 0.0353   | Under-expressed |
| ABCA7     | -0.42 | 0.0227   | 0.0401   | Under-expressed |
| PRSS36    | -0.42 | 0.0233   | 0.041    | Under-expressed |
| ZNF57     | -0.42 | 0.0246   | 0.0432   | Under-expressed |
| CD9       | -0.42 | 0.0253   | 0.0442   | Under-expressed |
| KPNA1     | -0.43 | 1.95E-10 | 4.27E-09 | Under-expressed |
| TECPR2    | -0.43 | 2.26E-07 | 1.79E-06 | Under-expressed |
| SLC39A9   | -0.43 | 4.61E-07 | 3.29E-06 | Under-expressed |
| HLCS      | -0.43 | 1.76E-06 | 1.03E-05 | Under-expressed |
| RAB5C     | -0.43 | 1.91E-06 | 1.11E-05 | Under-expressed |
| EXOC8     | -0.43 | 3.15E-06 | 1.71E-05 | Under-expressed |
| SYVN1     | -0.43 | 4.47E-06 | 2.34E-05 | Under-expressed |
| HADHB     | -0.43 | 4.96E-06 | 2.55E-05 | Under-expressed |
| POT1      | -0.43 | 6.69E-06 | 3.30E-05 | Under-expressed |
| SCARB2    | -0.43 | 7.03E-06 | 3.45E-05 | Under-expressed |
| AP4E1     | -0.43 | 1.29E-05 | 5.84E-05 | Under-expressed |
| SIK3      | -0.43 | 1.30E-05 | 5.89E-05 | Under-expressed |
| DNAJC3    | -0.43 | 1.46E-05 | 6.51E-05 | Under-expressed |
| ABHD13    | -0.43 | 1.70E-05 | 7.43E-05 | Under-expressed |
| XPC       | -0.43 | 2.16E-05 | 9.19E-05 | Under-expressed |
| PBRM1     | -0.43 | 2.82E-05 | 1.16E-04 | Under-expressed |
| GALNT1    | -0.43 | 2.90E-05 | 1.19E-04 | Under-expressed |
| ARHGEF9   | -0.43 | 3.23E-05 | 1.30E-04 | Under-expressed |
| RCBTB2    | -0.43 | 4.50E-05 | 1.74E-04 | Under-expressed |
| PDE8A     | -0.43 | 6.39E-05 | 2.36E-04 | Under-expressed |
| PPP2CB    | -0.43 | 8.76E-05 | 3.12E-04 | Under-expressed |
| RTN4      | -0.43 | 1.94E-04 | 6.27E-04 | Under-expressed |
| FDX1      | -0.43 | 2.07E-04 | 6.63E-04 | Under-expressed |
| KRIT1     | -0.43 | 2.12E-04 | 6.75E-04 | Under-expressed |
| DOCK4     | -0.43 | 2.69E-04 | 8.31E-04 | Under-expressed |
| CYB5R4    | -0.43 | 3.24E-04 | 9.78E-04 | Under-expressed |
| GALK2     | -0.43 | 4.02E-04 | 1.18E-03 | Under-expressed |
| GSAP      | -0.43 | 4.34E-04 | 1.26E-03 | Under-expressed |
| CSTF2T    | -0.43 | 5.23E-04 | 1.48E-03 | Under-expressed |
| CEP70     | -0.43 | 5.31E-04 | 1.50E-03 | Under-expressed |
| PARP11    | -0.43 | 5.44E-04 | 1.53E-03 | Under-expressed |
| PNPO      | -0.43 | 7.64E-04 | 2.06E-03 | Under-expressed |
| LTB4R2    | -0.43 | 7.99E-04 | 2.14E-03 | Under-expressed |
| TNKS2     | -0.43 | 8.29E-04 | 2.21E-03 | Under-expressed |
| VCL       | -0.43 | 1.37E-03 | 3.42E-03 | Under-expressed |
| APBB3     | -0.43 | 1.79E-03 | 4.32E-03 | Under-expressed |
| LOC652276 | -0.43 | 2.43E-03 | 5.66E-03 | Under-expressed |
| DOCK7     | -0.43 | 2.73E-03 | 6.27E-03 | Under-expressed |
| CEMIP2    | -0.43 | 3.56E-03 | 7.89E-03 | Under-expressed |
| MTR       | -0.43 | 4.79E-03 | 0.0103   | Under-expressed |
| ADCY3     | -0.43 | 5.91E-03 | 0.0123   | Under-expressed |

|           |       |          |          |                 |
|-----------|-------|----------|----------|-----------------|
| RUSC1-AS1 | -0.43 | 6.41E-03 | 0.0132   | Under-expressed |
| NRBP2     | -0.43 | 8.89E-03 | 0.0176   | Under-expressed |
| JCAD      | -0.43 | 9.53E-03 | 0.0187   | Under-expressed |
| IQCG      | -0.43 | 0.0106   | 0.0205   | Under-expressed |
| LRIG2     | -0.43 | 0.0114   | 0.0218   | Under-expressed |
| BCL2      | -0.43 | 0.0147   | 0.0273   | Under-expressed |
| WHRN      | -0.43 | 0.0155   | 0.0286   | Under-expressed |
| SLC43A3   | -0.43 | 0.0161   | 0.0296   | Under-expressed |
| TENT5A    | -0.43 | 0.0162   | 0.0297   | Under-expressed |
| AMER1     | -0.43 | 0.0167   | 0.0306   | Under-expressed |
| ADAMTS7   | -0.43 | 0.0209   | 0.0373   | Under-expressed |
| CPM       | -0.43 | 0.0231   | 0.0408   | Under-expressed |
| TOR1B     | -0.44 | 4.26E-08 | 4.29E-07 | Under-expressed |
| ZNF652    | -0.44 | 1.99E-07 | 1.61E-06 | Under-expressed |
| ZNF106    | -0.44 | 7.42E-07 | 4.95E-06 | Under-expressed |
| TUBGCP5   | -0.44 | 1.07E-06 | 6.74E-06 | Under-expressed |
| TK2       | -0.44 | 1.08E-06 | 6.83E-06 | Under-expressed |
| ZBED1     | -0.44 | 1.51E-06 | 9.04E-06 | Under-expressed |
| ZSCAN29   | -0.44 | 4.38E-06 | 2.30E-05 | Under-expressed |
| C18ORF25  | -0.44 | 5.20E-06 | 2.65E-05 | Under-expressed |
| FRS2      | -0.44 | 8.94E-06 | 4.26E-05 | Under-expressed |
| TMEM135   | -0.44 | 9.51E-06 | 4.50E-05 | Under-expressed |
| MAP3K3    | -0.44 | 1.01E-05 | 4.72E-05 | Under-expressed |
| ZADH2     | -0.44 | 1.29E-05 | 5.84E-05 | Under-expressed |
| USP30     | -0.44 | 1.87E-05 | 8.06E-05 | Under-expressed |
| LCMT2     | -0.44 | 2.44E-05 | 1.02E-04 | Under-expressed |
| ZNF674    | -0.44 | 2.55E-05 | 1.06E-04 | Under-expressed |
| MPP5      | -0.44 | 3.50E-05 | 1.40E-04 | Under-expressed |
| NFYB      | -0.44 | 3.91E-05 | 1.54E-04 | Under-expressed |
| DNAAF2    | -0.44 | 5.64E-05 | 2.13E-04 | Under-expressed |
| ZRANB1    | -0.44 | 5.80E-05 | 2.18E-04 | Under-expressed |
| INTS6     | -0.44 | 6.00E-05 | 2.24E-04 | Under-expressed |
| PREPL     | -0.44 | 7.04E-05 | 2.57E-04 | Under-expressed |
| ARHGEF10L | -0.44 | 8.38E-05 | 3.00E-04 | Under-expressed |
| ICOSLG    | -0.44 | 9.68E-05 | 3.41E-04 | Under-expressed |
| NOP9      | -0.44 | 1.23E-04 | 4.21E-04 | Under-expressed |
| FBXW2     | -0.44 | 1.26E-04 | 4.30E-04 | Under-expressed |
| PCCB      | -0.44 | 1.33E-04 | 4.50E-04 | Under-expressed |
| RAB3GAP1  | -0.44 | 1.37E-04 | 4.62E-04 | Under-expressed |
| EEA1      | -0.44 | 1.61E-04 | 5.31E-04 | Under-expressed |
| QKI       | -0.44 | 2.01E-04 | 6.47E-04 | Under-expressed |
| PEX7      | -0.44 | 2.06E-04 | 6.59E-04 | Under-expressed |
| HECA      | -0.44 | 2.08E-04 | 6.63E-04 | Under-expressed |
| USP31     | -0.44 | 2.30E-04 | 7.23E-04 | Under-expressed |
| HIVEP2    | -0.44 | 2.59E-04 | 8.03E-04 | Under-expressed |
| DUSP16    | -0.44 | 2.65E-04 | 8.19E-04 | Under-expressed |
| ACYP2     | -0.44 | 3.71E-04 | 1.10E-03 | Under-expressed |
| SLC25A13  | -0.44 | 4.21E-04 | 1.23E-03 | Under-expressed |
| TAF9B     | -0.44 | 4.55E-04 | 1.32E-03 | Under-expressed |
| TANK      | -0.44 | 5.91E-04 | 1.64E-03 | Under-expressed |
| SDCBP     | -0.44 | 6.00E-04 | 1.66E-03 | Under-expressed |
| ZNF687    | -0.44 | 7.66E-04 | 2.07E-03 | Under-expressed |
| SNAPC3    | -0.44 | 8.53E-04 | 2.27E-03 | Under-expressed |
| NR2F2     | -0.44 | 9.37E-04 | 2.46E-03 | Under-expressed |
| KAT6A     | -0.44 | 1.11E-03 | 2.83E-03 | Under-expressed |
| DST       | -0.44 | 1.36E-03 | 3.40E-03 | Under-expressed |
| PRRC2B    | -0.44 | 1.39E-03 | 3.47E-03 | Under-expressed |

|                        |       |          |          |                 |
|------------------------|-------|----------|----------|-----------------|
| TAB3                   | -0.44 | 1.41E-03 | 3.51E-03 | Under-expressed |
| FAM234B                | -0.44 | 1.42E-03 | 3.51E-03 | Under-expressed |
| CD34                   | -0.44 | 1.70E-03 | 4.13E-03 | Under-expressed |
| ELMSAN1                | -0.44 | 1.75E-03 | 4.23E-03 | Under-expressed |
| SH2D4A                 | -0.44 | 2.22E-03 | 5.23E-03 | Under-expressed |
| SYNPO                  | -0.44 | 2.50E-03 | 5.80E-03 | Under-expressed |
| NUP153                 | -0.44 | 2.64E-03 | 6.09E-03 | Under-expressed |
| KCTD9                  | -0.44 | 2.71E-03 | 6.24E-03 | Under-expressed |
| INSIG2                 | -0.44 | 2.97E-03 | 6.75E-03 | Under-expressed |
| TMEM173                | -0.44 | 5.21E-03 | 0.011    | Under-expressed |
| DTX2P1-UPK3BP1-PMS2P11 | -0.44 | 5.34E-03 | 0.0113   | Under-expressed |
| TRIM34                 | -0.44 | 5.50E-03 | 0.0115   | Under-expressed |
| IGFBP7                 | -0.44 | 5.71E-03 | 0.0119   | Under-expressed |
| MEIS3P1                | -0.44 | 8.31E-03 | 0.0166   | Under-expressed |
| C2ORF16                | -0.44 | 9.11E-03 | 0.018    | Under-expressed |
| SMAD7                  | -0.44 | 0.0114   | 0.0218   | Under-expressed |
| RECK                   | -0.44 | 0.0157   | 0.029    | Under-expressed |
| DHODH                  | -0.44 | 0.0184   | 0.0333   | Under-expressed |
| TLR5                   | -0.44 | 0.0279   | 0.0483   | Under-expressed |
| AHCYL1                 | -0.45 | 6.66E-09 | 8.69E-08 | Under-expressed |
| PCYT1A                 | -0.45 | 2.11E-08 | 2.35E-07 | Under-expressed |
| CCDC47                 | -0.45 | 9.82E-08 | 8.80E-07 | Under-expressed |
| SYNJ2BP                | -0.45 | 1.45E-07 | 1.24E-06 | Under-expressed |
| ZNF148                 | -0.45 | 2.08E-07 | 1.67E-06 | Under-expressed |
| VPS4B                  | -0.45 | 1.42E-06 | 8.59E-06 | Under-expressed |
| TIRAP                  | -0.45 | 1.74E-06 | 1.03E-05 | Under-expressed |
| CCSER2                 | -0.45 | 2.06E-06 | 1.18E-05 | Under-expressed |
| TBK1                   | -0.45 | 2.57E-06 | 1.43E-05 | Under-expressed |
| VPS26C                 | -0.45 | 3.11E-06 | 1.69E-05 | Under-expressed |
| YES1                   | -0.45 | 3.78E-06 | 2.01E-05 | Under-expressed |
| FPGT                   | -0.45 | 5.17E-06 | 2.64E-05 | Under-expressed |
| OSTM1                  | -0.45 | 5.19E-06 | 2.65E-05 | Under-expressed |
| TPP1                   | -0.45 | 7.38E-06 | 3.60E-05 | Under-expressed |
| FTO                    | -0.45 | 7.59E-06 | 3.69E-05 | Under-expressed |
| ZNF330                 | -0.45 | 1.11E-05 | 5.17E-05 | Under-expressed |
| ALG10                  | -0.45 | 1.39E-05 | 6.24E-05 | Under-expressed |
| ARFIP1                 | -0.45 | 2.14E-05 | 9.12E-05 | Under-expressed |
| MBTPS2                 | -0.45 | 2.70E-05 | 1.12E-04 | Under-expressed |
| HELZ                   | -0.45 | 3.47E-05 | 1.39E-04 | Under-expressed |
| SNTB2                  | -0.45 | 3.71E-05 | 1.47E-04 | Under-expressed |
| MLXIP                  | -0.45 | 3.73E-05 | 1.48E-04 | Under-expressed |
| ZNF91                  | -0.45 | 7.43E-05 | 2.70E-04 | Under-expressed |
| KLHL36                 | -0.45 | 9.28E-05 | 3.28E-04 | Under-expressed |
| LACTB                  | -0.45 | 9.86E-05 | 3.46E-04 | Under-expressed |
| ERC1                   | -0.45 | 1.12E-04 | 3.87E-04 | Under-expressed |
| PSD4                   | -0.45 | 1.17E-04 | 4.04E-04 | Under-expressed |
| WDR19                  | -0.45 | 1.77E-04 | 5.79E-04 | Under-expressed |
| RALGAPA1               | -0.45 | 1.85E-04 | 6.00E-04 | Under-expressed |
| CPPED1                 | -0.45 | 2.00E-04 | 6.45E-04 | Under-expressed |
| IFIT5                  | -0.45 | 2.07E-04 | 6.62E-04 | Under-expressed |
| ZNF609                 | -0.45 | 2.17E-04 | 6.89E-04 | Under-expressed |
| IL17RC                 | -0.45 | 2.25E-04 | 7.13E-04 | Under-expressed |
| TMOD3                  | -0.45 | 2.27E-04 | 7.16E-04 | Under-expressed |
| NUBPL                  | -0.45 | 2.36E-04 | 7.41E-04 | Under-expressed |
| MCCC1                  | -0.45 | 2.36E-04 | 7.41E-04 | Under-expressed |
| DNAJB5                 | -0.45 | 2.44E-04 | 7.63E-04 | Under-expressed |
| MAPK1                  | -0.45 | 2.53E-04 | 7.88E-04 | Under-expressed |

|          |       |          |          |                 |
|----------|-------|----------|----------|-----------------|
| SPTLC2   | -0.45 | 2.84E-04 | 8.71E-04 | Under-expressed |
| C1RL     | -0.45 | 3.34E-04 | 1.01E-03 | Under-expressed |
| AGTPBP1  | -0.45 | 3.86E-04 | 1.14E-03 | Under-expressed |
| CASD1    | -0.45 | 4.00E-04 | 1.17E-03 | Under-expressed |
| TMEM14A  | -0.45 | 4.86E-04 | 1.39E-03 | Under-expressed |
| SESN1    | -0.45 | 5.32E-04 | 1.50E-03 | Under-expressed |
| SLC24A1  | -0.45 | 6.62E-04 | 1.82E-03 | Under-expressed |
| TNKS     | -0.45 | 6.96E-04 | 1.90E-03 | Under-expressed |
| TGDS     | -0.45 | 7.89E-04 | 2.12E-03 | Under-expressed |
| DCBLD2   | -0.45 | 8.11E-04 | 2.17E-03 | Under-expressed |
| RXRA     | -0.45 | 8.67E-04 | 2.30E-03 | Under-expressed |
| ITGA6    | -0.45 | 1.06E-03 | 2.74E-03 | Under-expressed |
| LRP1     | -0.45 | 1.32E-03 | 3.31E-03 | Under-expressed |
| ATXN1    | -0.45 | 1.50E-03 | 3.69E-03 | Under-expressed |
| CHPT1    | -0.45 | 1.64E-03 | 4.00E-03 | Under-expressed |
| PCDH12   | -0.45 | 1.69E-03 | 4.10E-03 | Under-expressed |
| RALGPS2  | -0.45 | 1.78E-03 | 4.30E-03 | Under-expressed |
| RB1      | -0.45 | 2.18E-03 | 5.15E-03 | Under-expressed |
| IDS      | -0.45 | 2.24E-03 | 5.28E-03 | Under-expressed |
| BOC      | -0.45 | 3.49E-03 | 7.77E-03 | Under-expressed |
| DIXDC1   | -0.45 | 4.01E-03 | 8.76E-03 | Under-expressed |
| SLC19A2  | -0.45 | 4.85E-03 | 0.0104   | Under-expressed |
| CROT     | -0.45 | 5.06E-03 | 0.0107   | Under-expressed |
| JRKL     | -0.45 | 5.57E-03 | 0.0117   | Under-expressed |
| MLLT10   | -0.45 | 6.93E-03 | 0.0142   | Under-expressed |
| C19ORF57 | -0.45 | 8.52E-03 | 0.017    | Under-expressed |
| CSRP1    | -0.45 | 0.0131   | 0.0246   | Under-expressed |
| SMC3     | -0.45 | 0.0188   | 0.0339   | Under-expressed |
| ARAP2    | -0.45 | 0.023    | 0.0406   | Under-expressed |
| RNF185   | -0.46 | 1.04E-10 | 2.56E-09 | Under-expressed |
| TADA2B   | -0.46 | 1.83E-10 | 4.04E-09 | Under-expressed |
| CALCOCO2 | -0.46 | 4.15E-09 | 5.78E-08 | Under-expressed |
| TCEANC   | -0.46 | 2.44E-08 | 2.66E-07 | Under-expressed |
| KLF3     | -0.46 | 6.48E-08 | 6.13E-07 | Under-expressed |
| LRRC8A   | -0.46 | 9.95E-08 | 8.89E-07 | Under-expressed |
| KIAA0232 | -0.46 | 1.63E-07 | 1.37E-06 | Under-expressed |
| MKLN1    | -0.46 | 4.72E-07 | 3.35E-06 | Under-expressed |
| EIF2AK4  | -0.46 | 4.98E-07 | 3.52E-06 | Under-expressed |
| FAM160B1 | -0.46 | 7.42E-07 | 4.95E-06 | Under-expressed |
| NFATC2IP | -0.46 | 1.23E-06 | 7.59E-06 | Under-expressed |
| TAF5L    | -0.46 | 1.25E-06 | 7.67E-06 | Under-expressed |
| ATP2C1   | -0.46 | 1.26E-06 | 7.77E-06 | Under-expressed |
| TMEM175  | -0.46 | 1.42E-06 | 8.59E-06 | Under-expressed |
| IBTK     | -0.46 | 2.08E-06 | 1.19E-05 | Under-expressed |
| APPBP2   | -0.46 | 2.55E-06 | 1.43E-05 | Under-expressed |
| PUS10    | -0.46 | 2.91E-06 | 1.60E-05 | Under-expressed |
| SLC25A44 | -0.46 | 3.18E-06 | 1.72E-05 | Under-expressed |
| CDC73    | -0.46 | 3.96E-06 | 2.10E-05 | Under-expressed |
| MFAP3    | -0.46 | 6.27E-06 | 3.12E-05 | Under-expressed |
| RSBN1L   | -0.46 | 6.97E-06 | 3.43E-05 | Under-expressed |
| TRIM68   | -0.46 | 7.26E-06 | 3.55E-05 | Under-expressed |
| TBC1D14  | -0.46 | 9.90E-06 | 4.65E-05 | Under-expressed |
| TMLHE    | -0.46 | 1.04E-05 | 4.88E-05 | Under-expressed |
| SARAF    | -0.46 | 1.06E-05 | 4.93E-05 | Under-expressed |
| ESYT2    | -0.46 | 1.06E-05 | 4.96E-05 | Under-expressed |
| RNF111   | -0.46 | 1.46E-05 | 6.51E-05 | Under-expressed |
| GPR4     | -0.46 | 2.78E-05 | 1.15E-04 | Under-expressed |

|          |       |          |          |                 |
|----------|-------|----------|----------|-----------------|
| MYD88    | -0.46 | 2.98E-05 | 1.22E-04 | Under-expressed |
| VPS50    | -0.46 | 4.17E-05 | 1.63E-04 | Under-expressed |
| MYH9     | -0.46 | 4.26E-05 | 1.66E-04 | Under-expressed |
| 6-Mar    | -0.46 | 5.90E-05 | 2.21E-04 | Under-expressed |
| BRD4     | -0.46 | 6.55E-05 | 2.41E-04 | Under-expressed |
| PPM1D    | -0.46 | 8.04E-05 | 2.90E-04 | Under-expressed |
| MAPK6    | -0.46 | 9.21E-05 | 3.26E-04 | Under-expressed |
| TMF1     | -0.46 | 9.74E-05 | 3.43E-04 | Under-expressed |
| MFSD14A  | -0.46 | 1.00E-04 | 3.50E-04 | Under-expressed |
| KLHL5    | -0.46 | 1.23E-04 | 4.22E-04 | Under-expressed |
| TMED5    | -0.46 | 1.35E-04 | 4.57E-04 | Under-expressed |
| MTMR1    | -0.46 | 1.42E-04 | 4.74E-04 | Under-expressed |
| INIP     | -0.46 | 1.81E-04 | 5.89E-04 | Under-expressed |
| MAN2A2   | -0.46 | 2.31E-04 | 7.26E-04 | Under-expressed |
| RBBP9    | -0.46 | 2.46E-04 | 7.70E-04 | Under-expressed |
| AGO3     | -0.46 | 2.75E-04 | 8.47E-04 | Under-expressed |
| TP53INP2 | -0.46 | 3.49E-04 | 1.04E-03 | Under-expressed |
| ASCC3    | -0.46 | 4.32E-04 | 1.26E-03 | Under-expressed |
| GPATCH8  | -0.46 | 4.49E-04 | 1.30E-03 | Under-expressed |
| PANX1    | -0.46 | 4.53E-04 | 1.31E-03 | Under-expressed |
| ATM      | -0.46 | 5.36E-04 | 1.51E-03 | Under-expressed |
| RFFL     | -0.46 | 6.75E-04 | 1.85E-03 | Under-expressed |
| VPS37A   | -0.46 | 6.84E-04 | 1.87E-03 | Under-expressed |
| ANKIB1   | -0.46 | 8.32E-04 | 2.22E-03 | Under-expressed |
| DHCR24   | -0.46 | 1.61E-03 | 3.94E-03 | Under-expressed |
| TCF12    | -0.46 | 1.76E-03 | 4.26E-03 | Under-expressed |
| DHFR     | -0.46 | 2.11E-03 | 5.01E-03 | Under-expressed |
| LAP3     | -0.46 | 3.23E-03 | 7.26E-03 | Under-expressed |
| TEC      | -0.46 | 3.71E-03 | 8.16E-03 | Under-expressed |
| PGAP1    | -0.46 | 5.47E-03 | 0.0115   | Under-expressed |
| DDTL     | -0.46 | 7.58E-03 | 0.0153   | Under-expressed |
| CCDC88A  | -0.46 | 7.68E-03 | 0.0155   | Under-expressed |
| CFI      | -0.46 | 9.08E-03 | 0.018    | Under-expressed |
| ZNF254   | -0.46 | 0.0109   | 0.0211   | Under-expressed |
| NADK2    | -0.46 | 0.012    | 0.0229   | Under-expressed |
| DDO      | -0.46 | 0.0127   | 0.0241   | Under-expressed |
| IFT80    | -0.46 | 0.0179   | 0.0325   | Under-expressed |
| TLN2     | -0.46 | 0.0198   | 0.0356   | Under-expressed |
| FBXL7    | -0.46 | 0.0222   | 0.0393   | Under-expressed |
| SIK1     | -0.46 | 0.0233   | 0.0411   | Under-expressed |
| ABCC3    | -0.46 | 0.0246   | 0.0431   | Under-expressed |
| NEK9     | -0.47 | 2.06E-07 | 1.66E-06 | Under-expressed |
| DHX36    | -0.47 | 1.16E-06 | 7.23E-06 | Under-expressed |
| TLN1     | -0.47 | 1.43E-06 | 8.61E-06 | Under-expressed |
| IREB2    | -0.47 | 2.13E-06 | 1.22E-05 | Under-expressed |
| YIPF6    | -0.47 | 2.56E-06 | 1.43E-05 | Under-expressed |
| MON2     | -0.47 | 2.76E-06 | 1.52E-05 | Under-expressed |
| TARS2    | -0.47 | 3.61E-06 | 1.93E-05 | Under-expressed |
| GNAQ     | -0.47 | 6.91E-06 | 3.40E-05 | Under-expressed |
| FUBP3    | -0.47 | 7.99E-06 | 3.85E-05 | Under-expressed |
| EIF4G3   | -0.47 | 9.60E-06 | 4.54E-05 | Under-expressed |
| XIAP     | -0.47 | 1.34E-05 | 6.04E-05 | Under-expressed |
| TPP2     | -0.47 | 1.63E-05 | 7.19E-05 | Under-expressed |
| RNF103   | -0.47 | 1.96E-05 | 8.44E-05 | Under-expressed |
| FOXO4    | -0.47 | 2.32E-05 | 9.75E-05 | Under-expressed |
| TOB2     | -0.47 | 2.74E-05 | 1.13E-04 | Under-expressed |
| RBAK     | -0.47 | 2.84E-05 | 1.17E-04 | Under-expressed |



|          |       |          |          |                 |
|----------|-------|----------|----------|-----------------|
| LMBR1    | -0.47 | 3.88E-05 | 1.53E-04 | Under-expressed |
| EPG5     | -0.47 | 4.43E-05 | 1.72E-04 | Under-expressed |
| ZNF417   | -0.47 | 6.17E-05 | 2.29E-04 | Under-expressed |
| SUN1     | -0.47 | 7.16E-05 | 2.61E-04 | Under-expressed |
| BDP1     | -0.47 | 9.84E-05 | 3.46E-04 | Under-expressed |
| TTC14    | -0.47 | 1.31E-04 | 4.44E-04 | Under-expressed |
| ATP9B    | -0.47 | 1.61E-04 | 5.31E-04 | Under-expressed |
| TIPARP   | -0.47 | 1.75E-04 | 5.71E-04 | Under-expressed |
| FBXO34   | -0.47 | 2.30E-04 | 7.25E-04 | Under-expressed |
| ZNF443   | -0.47 | 2.48E-04 | 7.75E-04 | Under-expressed |
| KMT2D    | -0.47 | 2.71E-04 | 8.36E-04 | Under-expressed |
| LPP      | -0.47 | 3.18E-04 | 9.64E-04 | Under-expressed |
| FYN      | -0.47 | 3.45E-04 | 1.04E-03 | Under-expressed |
| ARID1B   | -0.47 | 3.99E-04 | 1.17E-03 | Under-expressed |
| MTHFS    | -0.47 | 5.65E-04 | 1.58E-03 | Under-expressed |
| PDIA3P1  | -0.47 | 5.98E-04 | 1.66E-03 | Under-expressed |
| SPTSSA   | -0.47 | 7.61E-04 | 2.05E-03 | Under-expressed |
| MSN      | -0.47 | 8.55E-04 | 2.28E-03 | Under-expressed |
| RECQL    | -0.47 | 1.06E-03 | 2.74E-03 | Under-expressed |
| MIB1     | -0.47 | 1.37E-03 | 3.41E-03 | Under-expressed |
| NSD3     | -0.47 | 1.40E-03 | 3.48E-03 | Under-expressed |
| CHD6     | -0.47 | 1.42E-03 | 3.53E-03 | Under-expressed |
| NCAPD3   | -0.47 | 2.79E-03 | 6.39E-03 | Under-expressed |
| CEP192   | -0.47 | 3.41E-03 | 7.62E-03 | Under-expressed |
| SERPINB9 | -0.47 | 3.49E-03 | 7.76E-03 | Under-expressed |
| ZNF433   | -0.47 | 3.88E-03 | 8.50E-03 | Under-expressed |
| BAHCC1   | -0.47 | 4.60E-03 | 9.90E-03 | Under-expressed |
| NAV1     | -0.47 | 4.60E-03 | 9.91E-03 | Under-expressed |
| WDFY3    | -0.47 | 5.20E-03 | 0.011    | Under-expressed |
| RND3     | -0.47 | 6.96E-03 | 0.0142   | Under-expressed |
| MRAS     | -0.47 | 8.60E-03 | 0.0171   | Under-expressed |
| TLE4     | -0.47 | 0.0151   | 0.0281   | Under-expressed |
| GUCY1B1  | -0.47 | 0.0215   | 0.0383   | Under-expressed |
| PSTPIP2  | -0.47 | 0.0219   | 0.0389   | Under-expressed |
| C5       | -0.47 | 0.027    | 0.0469   | Under-expressed |
| TNFAIP1  | -0.48 | 1.94E-10 | 4.25E-09 | Under-expressed |
| SACM1L   | -0.48 | 2.10E-10 | 4.55E-09 | Under-expressed |
| GOLGA1   | -0.48 | 5.13E-10 | 9.78E-09 | Under-expressed |
| ARNT     | -0.48 | 1.83E-07 | 1.50E-06 | Under-expressed |
| MFN2     | -0.48 | 3.88E-07 | 2.82E-06 | Under-expressed |
| SPRTN    | -0.48 | 7.29E-07 | 4.88E-06 | Under-expressed |
| PIGV     | -0.48 | 1.06E-06 | 6.70E-06 | Under-expressed |
| FKTN     | -0.48 | 2.26E-06 | 1.28E-05 | Under-expressed |
| KLHL7    | -0.48 | 2.54E-06 | 1.42E-05 | Under-expressed |
| PPM1B    | -0.48 | 4.26E-06 | 2.24E-05 | Under-expressed |
| AASDH    | -0.48 | 4.30E-06 | 2.26E-05 | Under-expressed |
| FRYL     | -0.48 | 6.56E-06 | 3.25E-05 | Under-expressed |
| NKIRAS1  | -0.48 | 8.65E-06 | 4.14E-05 | Under-expressed |
| LDLRAP1  | -0.48 | 9.19E-06 | 4.37E-05 | Under-expressed |
| RAB33B   | -0.48 | 1.88E-05 | 8.10E-05 | Under-expressed |
| FEM1C    | -0.48 | 2.50E-05 | 1.04E-04 | Under-expressed |
| ST20-AS1 | -0.48 | 2.72E-05 | 1.12E-04 | Under-expressed |
| KRCC1    | -0.48 | 2.79E-05 | 1.15E-04 | Under-expressed |
| TMEM123  | -0.48 | 3.02E-05 | 1.23E-04 | Under-expressed |
| FAM120B  | -0.48 | 3.15E-05 | 1.28E-04 | Under-expressed |
| BICRAL   | -0.48 | 3.33E-05 | 1.34E-04 | Under-expressed |
| SFXN1    | -0.48 | 4.75E-05 | 1.83E-04 | Under-expressed |

|          |       |          |          |                 |
|----------|-------|----------|----------|-----------------|
| ZNF799   | -0.48 | 6.64E-05 | 2.44E-04 | Under-expressed |
| MTMR9    | -0.48 | 7.90E-05 | 2.85E-04 | Under-expressed |
| CALCOCO1 | -0.48 | 8.69E-05 | 3.10E-04 | Under-expressed |
| ARSK     | -0.48 | 1.05E-04 | 3.65E-04 | Under-expressed |
| G2E3     | -0.48 | 1.44E-04 | 4.81E-04 | Under-expressed |
| ASMTL    | -0.48 | 1.64E-04 | 5.38E-04 | Under-expressed |
| C16ORF46 | -0.48 | 1.93E-04 | 6.24E-04 | Under-expressed |
| USP35    | -0.48 | 2.03E-04 | 6.53E-04 | Under-expressed |
| CRYZ     | -0.48 | 2.61E-04 | 8.10E-04 | Under-expressed |
| BACH1    | -0.48 | 2.65E-04 | 8.18E-04 | Under-expressed |
| MED14    | -0.48 | 3.91E-04 | 1.15E-03 | Under-expressed |
| ZC3H12C  | -0.48 | 1.11E-03 | 2.85E-03 | Under-expressed |
| PLEKHA5  | -0.48 | 1.14E-03 | 2.90E-03 | Under-expressed |
| NIBAN1   | -0.48 | 1.30E-03 | 3.28E-03 | Under-expressed |
| ANTXR2   | -0.48 | 1.36E-03 | 3.40E-03 | Under-expressed |
| PATJ     | -0.48 | 1.57E-03 | 3.86E-03 | Under-expressed |
| STBD1    | -0.48 | 1.78E-03 | 4.30E-03 | Under-expressed |
| MTURN    | -0.48 | 2.30E-03 | 5.38E-03 | Under-expressed |
| HSPA12B  | -0.48 | 2.49E-03 | 5.77E-03 | Under-expressed |
| GCDH     | -0.48 | 2.49E-03 | 5.78E-03 | Under-expressed |
| GALNT10  | -0.48 | 3.00E-03 | 6.81E-03 | Under-expressed |
| TMOD2    | -0.48 | 3.65E-03 | 8.05E-03 | Under-expressed |
| LRRC34   | -0.48 | 4.65E-03 | 9.99E-03 | Under-expressed |
| ARAP3    | -0.48 | 4.77E-03 | 0.0102   | Under-expressed |
| ATL1     | -0.48 | 6.92E-03 | 0.0142   | Under-expressed |
| GJA1     | -0.48 | 0.0101   | 0.0198   | Under-expressed |
| ZNF563   | -0.48 | 0.0183   | 0.0332   | Under-expressed |
| HEPH     | -0.48 | 0.0221   | 0.0391   | Under-expressed |
| OLFML2A  | -0.48 | 0.0259   | 0.0451   | Under-expressed |
| OSBP     | -0.49 | 8.57E-10 | 1.50E-08 | Under-expressed |
| ZFP91    | -0.49 | 1.39E-07 | 1.19E-06 | Under-expressed |
| STIM1    | -0.49 | 2.31E-07 | 1.82E-06 | Under-expressed |
| CPOX     | -0.49 | 3.39E-07 | 2.53E-06 | Under-expressed |
| PPP4R3B  | -0.49 | 9.88E-07 | 6.31E-06 | Under-expressed |
| RANBP9   | -0.49 | 1.37E-06 | 8.32E-06 | Under-expressed |
| ATL2     | -0.49 | 1.41E-06 | 8.55E-06 | Under-expressed |
| AMFR     | -0.49 | 1.75E-06 | 1.03E-05 | Under-expressed |
| TRAPPC11 | -0.49 | 2.06E-06 | 1.18E-05 | Under-expressed |
| DNAJC13  | -0.49 | 2.54E-06 | 1.42E-05 | Under-expressed |
| SMG1     | -0.49 | 4.49E-06 | 2.34E-05 | Under-expressed |
| DYRK1A   | -0.49 | 4.78E-06 | 2.47E-05 | Under-expressed |
| RCOR1    | -0.49 | 9.41E-06 | 4.46E-05 | Under-expressed |
| BRWD1    | -0.49 | 1.31E-05 | 5.95E-05 | Under-expressed |
| PIAS2    | -0.49 | 1.47E-05 | 6.54E-05 | Under-expressed |
| ARID1A   | -0.49 | 2.27E-05 | 9.57E-05 | Under-expressed |
| SEN8     | -0.49 | 3.48E-05 | 1.40E-04 | Under-expressed |
| WDR24    | -0.49 | 4.70E-05 | 1.81E-04 | Under-expressed |
| SCAPER   | -0.49 | 9.49E-05 | 3.35E-04 | Under-expressed |
| PHLPP1   | -0.49 | 1.14E-04 | 3.93E-04 | Under-expressed |
| USO1     | -0.49 | 1.28E-04 | 4.36E-04 | Under-expressed |
| HMGXB4   | -0.49 | 3.15E-04 | 9.55E-04 | Under-expressed |
| IRF2BPL  | -0.49 | 3.35E-04 | 1.01E-03 | Under-expressed |
| GK5      | -0.49 | 3.76E-04 | 1.11E-03 | Under-expressed |
| SLK      | -0.49 | 3.94E-04 | 1.16E-03 | Under-expressed |
| SPIN1    | -0.49 | 1.75E-03 | 4.23E-03 | Under-expressed |
| RASSF5   | -0.49 | 2.92E-03 | 6.64E-03 | Under-expressed |
| ZNF154   | -0.49 | 6.11E-03 | 0.0127   | Under-expressed |

|          |       |          |          |                 |
|----------|-------|----------|----------|-----------------|
| FAM43A   | -0.49 | 6.46E-03 | 0.0133   | Under-expressed |
| GORAB    | -0.49 | 8.72E-03 | 0.0173   | Under-expressed |
| MIS18BP1 | -0.49 | 0.01     | 0.0196   | Under-expressed |
| TBC1D4   | -0.49 | 0.0105   | 0.0204   | Under-expressed |
| SH3RF1   | -0.49 | 0.0114   | 0.0218   | Under-expressed |
| RADX     | -0.49 | 0.0169   | 0.0309   | Under-expressed |
| PDE12    | -0.5  | 1.24E-09 | 2.06E-08 | Under-expressed |
| TMEM33   | -0.5  | 3.20E-09 | 4.64E-08 | Under-expressed |
| SPAG9    | -0.5  | 1.11E-08 | 1.34E-07 | Under-expressed |
| GOLGA5   | -0.5  | 3.32E-08 | 3.48E-07 | Under-expressed |
| KIF1B    | -0.5  | 8.77E-07 | 5.71E-06 | Under-expressed |
| FAM199X  | -0.5  | 8.82E-07 | 5.74E-06 | Under-expressed |
| TEX2     | -0.5  | 9.98E-07 | 6.37E-06 | Under-expressed |
| ZHX3     | -0.5  | 1.74E-06 | 1.03E-05 | Under-expressed |
| MACF1    | -0.5  | 2.08E-06 | 1.19E-05 | Under-expressed |
| CLASP2   | -0.5  | 6.66E-06 | 3.29E-05 | Under-expressed |
| PEX3     | -0.5  | 1.18E-05 | 5.43E-05 | Under-expressed |
| GGCX     | -0.5  | 1.22E-05 | 5.59E-05 | Under-expressed |
| EPM2AIP1 | -0.5  | 1.97E-05 | 8.47E-05 | Under-expressed |
| PRKACA   | -0.5  | 3.56E-05 | 1.42E-04 | Under-expressed |
| FAM76B   | -0.5  | 6.94E-05 | 2.54E-04 | Under-expressed |
| PLVAP    | -0.5  | 9.21E-05 | 3.26E-04 | Under-expressed |
| AHNAK    | -0.5  | 9.51E-05 | 3.35E-04 | Under-expressed |
| ZNF627   | -0.5  | 1.00E-04 | 3.50E-04 | Under-expressed |
| MEF2C    | -0.5  | 1.19E-04 | 4.10E-04 | Under-expressed |
| PDK2     | -0.5  | 1.27E-04 | 4.34E-04 | Under-expressed |
| EFR3A    | -0.5  | 1.27E-04 | 4.34E-04 | Under-expressed |
| PEAK1    | -0.5  | 1.37E-04 | 4.61E-04 | Under-expressed |
| NEMF     | -0.5  | 1.48E-04 | 4.93E-04 | Under-expressed |
| CMTM6    | -0.5  | 2.02E-04 | 6.48E-04 | Under-expressed |
| UBA7     | -0.5  | 2.44E-04 | 7.64E-04 | Under-expressed |
| ATP2B4   | -0.5  | 2.52E-04 | 7.85E-04 | Under-expressed |
| ZBTB1    | -0.5  | 2.59E-04 | 8.05E-04 | Under-expressed |
| GAB1     | -0.5  | 2.81E-04 | 8.63E-04 | Under-expressed |
| MED13L   | -0.5  | 4.70E-04 | 1.35E-03 | Under-expressed |
| RAB27A   | -0.5  | 5.05E-04 | 1.44E-03 | Under-expressed |
| ZBTB39   | -0.5  | 8.35E-04 | 2.23E-03 | Under-expressed |
| COQ10A   | -0.5  | 9.27E-04 | 2.44E-03 | Under-expressed |
| BAZ1A    | -0.5  | 1.03E-03 | 2.67E-03 | Under-expressed |
| DUSP10   | -0.5  | 1.03E-03 | 2.67E-03 | Under-expressed |
| MAPRE2   | -0.5  | 1.08E-03 | 2.78E-03 | Under-expressed |
| ZNF440   | -0.5  | 1.10E-03 | 2.82E-03 | Under-expressed |
| ZNF354B  | -0.5  | 1.31E-03 | 3.29E-03 | Under-expressed |
| ZNF595   | -0.5  | 1.42E-03 | 3.52E-03 | Under-expressed |
| TYW1B    | -0.5  | 2.78E-03 | 6.38E-03 | Under-expressed |
| RASAL2   | -0.5  | 4.57E-03 | 9.84E-03 | Under-expressed |
| RGPD4    | -0.5  | 4.95E-03 | 0.0105   | Under-expressed |
| CDK11A   | -0.5  | 5.70E-03 | 0.0119   | Under-expressed |
| DNAJB4   | -0.5  | 6.76E-03 | 0.0139   | Under-expressed |
| GALC     | -0.5  | 9.66E-03 | 0.0189   | Under-expressed |
| TOX2     | -0.5  | 9.75E-03 | 0.0191   | Under-expressed |
| APP      | -0.5  | 0.0113   | 0.0218   | Under-expressed |
| ANKRD24  | -0.5  | 0.0128   | 0.0242   | Under-expressed |
| FSTL1    | -0.5  | 0.0146   | 0.0271   | Under-expressed |
| SLC16A1  | -0.5  | 0.0166   | 0.0303   | Under-expressed |
| GPIHBP1  | -0.5  | 0.0176   | 0.032    | Under-expressed |
| PSAT1    | -0.5  | 0.024    | 0.0422   | Under-expressed |

|            |       |          |          |                 |
|------------|-------|----------|----------|-----------------|
| ATP6V1A    | -0.51 | 4.19E-10 | 8.29E-09 | Under-expressed |
| CREBBP     | -0.51 | 1.19E-08 | 1.43E-07 | Under-expressed |
| PPM1A      | -0.51 | 1.68E-08 | 1.93E-07 | Under-expressed |
| SENP2      | -0.51 | 4.75E-08 | 4.70E-07 | Under-expressed |
| RNF11      | -0.51 | 2.30E-07 | 1.81E-06 | Under-expressed |
| SNIP1      | -0.51 | 2.76E-07 | 2.12E-06 | Under-expressed |
| WASHC4     | -0.51 | 2.89E-07 | 2.21E-06 | Under-expressed |
| SOCS4      | -0.51 | 5.94E-07 | 4.10E-06 | Under-expressed |
| UPRT       | -0.51 | 6.94E-07 | 4.68E-06 | Under-expressed |
| SLMAP      | -0.51 | 1.20E-06 | 7.48E-06 | Under-expressed |
| KDM4A      | -0.51 | 1.22E-06 | 7.58E-06 | Under-expressed |
| PDIK1L     | -0.51 | 1.99E-06 | 1.15E-05 | Under-expressed |
| KIAA0586   | -0.51 | 4.00E-06 | 2.12E-05 | Under-expressed |
| PARP14     | -0.51 | 5.60E-06 | 2.83E-05 | Under-expressed |
| PHC3       | -0.51 | 6.08E-06 | 3.04E-05 | Under-expressed |
| NCOA4      | -0.51 | 1.13E-05 | 5.23E-05 | Under-expressed |
| CLINT1     | -0.51 | 1.42E-05 | 6.38E-05 | Under-expressed |
| HECTD4     | -0.51 | 2.40E-05 | 1.01E-04 | Under-expressed |
| PIBF1      | -0.51 | 3.61E-05 | 1.44E-04 | Under-expressed |
| FARP2      | -0.51 | 3.82E-05 | 1.51E-04 | Under-expressed |
| ATAD2B     | -0.51 | 4.87E-05 | 1.87E-04 | Under-expressed |
| CSGALNACT2 | -0.51 | 5.07E-05 | 1.93E-04 | Under-expressed |
| PANK3      | -0.51 | 5.59E-05 | 2.11E-04 | Under-expressed |
| DICER1     | -0.51 | 5.86E-05 | 2.20E-04 | Under-expressed |
| ETFRF1     | -0.51 | 9.62E-05 | 3.39E-04 | Under-expressed |
| SHTN1      | -0.51 | 9.90E-05 | 3.47E-04 | Under-expressed |
| RHOBTB2    | -0.51 | 2.57E-04 | 7.98E-04 | Under-expressed |
| FBXO30     | -0.51 | 3.57E-04 | 1.07E-03 | Under-expressed |
| BPHL       | -0.51 | 4.04E-04 | 1.19E-03 | Under-expressed |
| UNC13B     | -0.51 | 4.69E-04 | 1.35E-03 | Under-expressed |
| ZBTB41     | -0.51 | 4.84E-04 | 1.39E-03 | Under-expressed |
| TADA2A     | -0.51 | 6.91E-04 | 1.89E-03 | Under-expressed |
| NKTR       | -0.51 | 7.22E-04 | 1.96E-03 | Under-expressed |
| BDH2       | -0.51 | 7.55E-04 | 2.04E-03 | Under-expressed |
| SPRY2      | -0.51 | 9.67E-04 | 2.53E-03 | Under-expressed |
| PIP5K1A    | -0.51 | 1.01E-03 | 2.62E-03 | Under-expressed |
| SFXN5      | -0.51 | 1.22E-03 | 3.10E-03 | Under-expressed |
| DPYSL2     | -0.51 | 1.37E-03 | 3.42E-03 | Under-expressed |
| ZNF836     | -0.51 | 2.41E-03 | 5.63E-03 | Under-expressed |
| P2RY8      | -0.51 | 2.83E-03 | 6.48E-03 | Under-expressed |
| SAMD9      | -0.51 | 3.26E-03 | 7.32E-03 | Under-expressed |
| L3MBTL4    | -0.51 | 3.68E-03 | 8.11E-03 | Under-expressed |
| ATF7IP2    | -0.51 | 4.25E-03 | 9.23E-03 | Under-expressed |
| IRS2       | -0.51 | 4.46E-03 | 9.63E-03 | Under-expressed |
| RARB       | -0.51 | 4.59E-03 | 9.88E-03 | Under-expressed |
| GJA4       | -0.51 | 4.70E-03 | 0.0101   | Under-expressed |
| PBX3       | -0.51 | 4.94E-03 | 0.0105   | Under-expressed |
| TCP11L2    | -0.51 | 6.29E-03 | 0.013    | Under-expressed |
| STXBP1     | -0.51 | 7.71E-03 | 0.0156   | Under-expressed |
| ACE        | -0.51 | 9.26E-03 | 0.0183   | Under-expressed |
| IFI16      | -0.51 | 0.0117   | 0.0223   | Under-expressed |
| GNG7       | -0.51 | 0.0165   | 0.0303   | Under-expressed |
| PTPRC      | -0.51 | 0.0289   | 0.0497   | Under-expressed |
| STX17      | -0.52 | 3.07E-10 | 6.30E-09 | Under-expressed |
| ZFYVE1     | -0.52 | 1.36E-08 | 1.61E-07 | Under-expressed |
| TRMT1L     | -0.52 | 3.08E-08 | 3.26E-07 | Under-expressed |
| CDC42BPB   | -0.52 | 4.23E-08 | 4.27E-07 | Under-expressed |

|           |       |          |          |                 |
|-----------|-------|----------|----------|-----------------|
| PCNX1     | -0.52 | 5.33E-08 | 5.22E-07 | Under-expressed |
| SRP54     | -0.52 | 1.08E-07 | 9.50E-07 | Under-expressed |
| DCLRE1A   | -0.52 | 3.32E-07 | 2.48E-06 | Under-expressed |
| MFSD1     | -0.52 | 4.32E-07 | 3.11E-06 | Under-expressed |
| MIER1     | -0.52 | 5.89E-07 | 4.07E-06 | Under-expressed |
| SSH1      | -0.52 | 1.75E-06 | 1.03E-05 | Under-expressed |
| ANKRD12   | -0.52 | 7.83E-06 | 3.79E-05 | Under-expressed |
| UBR2      | -0.52 | 9.81E-06 | 4.62E-05 | Under-expressed |
| GOT2      | -0.52 | 1.15E-05 | 5.32E-05 | Under-expressed |
| AKAP11    | -0.52 | 1.32E-05 | 5.99E-05 | Under-expressed |
| FAM210B   | -0.52 | 1.63E-05 | 7.17E-05 | Under-expressed |
| PCCA      | -0.52 | 2.90E-05 | 1.19E-04 | Under-expressed |
| TADA1     | -0.52 | 3.56E-05 | 1.42E-04 | Under-expressed |
| GAB2      | -0.52 | 4.16E-05 | 1.63E-04 | Under-expressed |
| SS18L1    | -0.52 | 4.27E-05 | 1.67E-04 | Under-expressed |
| VAMP1     | -0.52 | 5.99E-05 | 2.23E-04 | Under-expressed |
| CRAT      | -0.52 | 6.28E-05 | 2.33E-04 | Under-expressed |
| AFF1      | -0.52 | 7.04E-05 | 2.57E-04 | Under-expressed |
| ZNF510    | -0.52 | 7.76E-05 | 2.81E-04 | Under-expressed |
| NPAT      | -0.52 | 8.07E-05 | 2.91E-04 | Under-expressed |
| PLEKHM1P1 | -0.52 | 8.76E-05 | 3.12E-04 | Under-expressed |
| SP3       | -0.52 | 8.99E-05 | 3.19E-04 | Under-expressed |
| TMEM161B  | -0.52 | 1.04E-04 | 3.64E-04 | Under-expressed |
| CCDC121   | -0.52 | 1.62E-04 | 5.34E-04 | Under-expressed |
| FANCM     | -0.52 | 2.44E-04 | 7.64E-04 | Under-expressed |
| TNS2      | -0.52 | 3.95E-04 | 1.16E-03 | Under-expressed |
| USHBP1    | -0.52 | 4.36E-04 | 1.27E-03 | Under-expressed |
| MZF1-AS1  | -0.52 | 4.72E-04 | 1.36E-03 | Under-expressed |
| ALG10B    | -0.52 | 5.71E-04 | 1.60E-03 | Under-expressed |
| TSPYL4    | -0.52 | 8.10E-04 | 2.17E-03 | Under-expressed |
| PRKCH     | -0.52 | 8.11E-04 | 2.17E-03 | Under-expressed |
| MARS2     | -0.52 | 1.42E-03 | 3.52E-03 | Under-expressed |
| CLEC14A   | -0.52 | 1.52E-03 | 3.74E-03 | Under-expressed |
| BCOR      | -0.52 | 1.60E-03 | 3.91E-03 | Under-expressed |
| SLC20A2   | -0.52 | 1.78E-03 | 4.30E-03 | Under-expressed |
| C1ORF226  | -0.52 | 2.30E-03 | 5.39E-03 | Under-expressed |
| LRRC32    | -0.52 | 2.42E-03 | 5.64E-03 | Under-expressed |
| PDGFRB    | -0.52 | 2.96E-03 | 6.73E-03 | Under-expressed |
| MYO5C     | -0.52 | 3.35E-03 | 7.49E-03 | Under-expressed |
| ANKRD26   | -0.52 | 3.45E-03 | 7.69E-03 | Under-expressed |
| ALPK1     | -0.52 | 5.03E-03 | 0.0107   | Under-expressed |
| PCNX4     | -0.52 | 0.0103   | 0.02     | Under-expressed |
| PXMP2     | -0.52 | 0.0103   | 0.02     | Under-expressed |
| TSHZ3     | -0.52 | 0.011    | 0.0211   | Under-expressed |
| GATA6     | -0.52 | 0.0146   | 0.0272   | Under-expressed |
| DGKE      | -0.52 | 0.0149   | 0.0277   | Under-expressed |
| LPCAT2    | -0.52 | 0.0152   | 0.0281   | Under-expressed |
| LURAP1L   | -0.52 | 0.0171   | 0.0311   | Under-expressed |
| SRBD1     | -0.53 | 8.56E-09 | 1.07E-07 | Under-expressed |
| UVRAG     | -0.53 | 3.36E-08 | 3.51E-07 | Under-expressed |
| ANKH      | -0.53 | 2.88E-07 | 2.20E-06 | Under-expressed |
| NFE2L1    | -0.53 | 3.71E-07 | 2.73E-06 | Under-expressed |
| SPPL2A    | -0.53 | 4.61E-07 | 3.29E-06 | Under-expressed |
| APLP2     | -0.53 | 7.32E-07 | 4.90E-06 | Under-expressed |
| EVI5      | -0.53 | 7.98E-07 | 5.25E-06 | Under-expressed |
| SETD2     | -0.53 | 8.07E-07 | 5.31E-06 | Under-expressed |
| SP2       | -0.53 | 1.35E-06 | 8.25E-06 | Under-expressed |

|           |       |          |          |                 |
|-----------|-------|----------|----------|-----------------|
| ABCD3     | -0.53 | 1.52E-06 | 9.09E-06 | Under-expressed |
| DLG1      | -0.53 | 1.85E-06 | 1.08E-05 | Under-expressed |
| GABPA     | -0.53 | 2.23E-06 | 1.27E-05 | Under-expressed |
| C5ORF51   | -0.53 | 2.28E-06 | 1.29E-05 | Under-expressed |
| IL13RA1   | -0.53 | 3.45E-06 | 1.85E-05 | Under-expressed |
| ATF7IP    | -0.53 | 3.72E-06 | 1.98E-05 | Under-expressed |
| TCEANC2   | -0.53 | 4.57E-06 | 2.37E-05 | Under-expressed |
| HDAC6     | -0.53 | 1.55E-05 | 6.87E-05 | Under-expressed |
| TNFAIP8L1 | -0.53 | 2.51E-05 | 1.05E-04 | Under-expressed |
| DNAJB9    | -0.53 | 5.04E-05 | 1.92E-04 | Under-expressed |
| ZMYM1     | -0.53 | 5.62E-05 | 2.12E-04 | Under-expressed |
| DDX59     | -0.53 | 6.13E-05 | 2.28E-04 | Under-expressed |
| RAB11FIP2 | -0.53 | 6.69E-05 | 2.46E-04 | Under-expressed |
| ENTPD7    | -0.53 | 7.96E-05 | 2.87E-04 | Under-expressed |
| ADGRL4    | -0.53 | 1.38E-04 | 4.64E-04 | Under-expressed |
| PINK1     | -0.53 | 1.69E-04 | 5.55E-04 | Under-expressed |
| DENND5B   | -0.53 | 2.32E-04 | 7.31E-04 | Under-expressed |
| SENP7     | -0.53 | 2.36E-04 | 7.41E-04 | Under-expressed |
| GALNT11   | -0.53 | 2.44E-04 | 7.63E-04 | Under-expressed |
| C1ORF109  | -0.53 | 2.69E-04 | 8.30E-04 | Under-expressed |
| EPS8      | -0.53 | 3.78E-04 | 1.12E-03 | Under-expressed |
| PMS2P2    | -0.53 | 4.13E-04 | 1.21E-03 | Under-expressed |
| LARGE1    | -0.53 | 5.41E-04 | 1.52E-03 | Under-expressed |
| DLC1      | -0.53 | 6.95E-04 | 1.90E-03 | Under-expressed |
| ATP8B1    | -0.53 | 7.58E-04 | 2.05E-03 | Under-expressed |
| ZFPM1     | -0.53 | 8.33E-04 | 2.22E-03 | Under-expressed |
| PORCN     | -0.53 | 1.04E-03 | 2.69E-03 | Under-expressed |
| ANXA1     | -0.53 | 1.15E-03 | 2.93E-03 | Under-expressed |
| RGPD1     | -0.53 | 2.11E-03 | 5.01E-03 | Under-expressed |
| RAPGEF5   | -0.53 | 2.32E-03 | 5.44E-03 | Under-expressed |
| ATP8A1    | -0.53 | 3.15E-03 | 7.11E-03 | Under-expressed |
| ASAP3     | -0.53 | 3.48E-03 | 7.74E-03 | Under-expressed |
| LRRC4     | -0.53 | 7.53E-03 | 0.0152   | Under-expressed |
| CLU       | -0.53 | 9.14E-03 | 0.0181   | Under-expressed |
| GABARAPL1 | -0.53 | 9.21E-03 | 0.0182   | Under-expressed |
| PDE4B     | -0.53 | 0.0113   | 0.0218   | Under-expressed |
| ONECUT2   | -0.53 | 0.0179   | 0.0325   | Under-expressed |
| PPP1R3C   | -0.53 | 0.0232   | 0.0409   | Under-expressed |
| PTCH1     | -0.53 | 0.0286   | 0.0493   | Under-expressed |
| SLAIN2    | -0.54 | 2.55E-10 | 5.42E-09 | Under-expressed |
| FEM1B     | -0.54 | 1.50E-08 | 1.75E-07 | Under-expressed |
| ACAD8     | -0.54 | 2.47E-08 | 2.69E-07 | Under-expressed |
| ATG4A     | -0.54 | 3.10E-08 | 3.27E-07 | Under-expressed |
| MCFD2     | -0.54 | 4.09E-08 | 4.17E-07 | Under-expressed |
| GFOD2     | -0.54 | 6.90E-08 | 6.48E-07 | Under-expressed |
| DIS3L     | -0.54 | 2.56E-07 | 1.98E-06 | Under-expressed |
| VAMP4     | -0.54 | 2.58E-07 | 2.00E-06 | Under-expressed |
| SLC35B4   | -0.54 | 3.87E-07 | 2.82E-06 | Under-expressed |
| MPPE1     | -0.54 | 6.39E-07 | 4.37E-06 | Under-expressed |
| DENND4C   | -0.54 | 8.42E-07 | 5.50E-06 | Under-expressed |
| ZMYND11   | -0.54 | 1.14E-06 | 7.12E-06 | Under-expressed |
| JAK1      | -0.54 | 1.22E-06 | 7.53E-06 | Under-expressed |
| NF1       | -0.54 | 1.48E-06 | 8.87E-06 | Under-expressed |
| TMEM106B  | -0.54 | 1.68E-06 | 9.94E-06 | Under-expressed |
| TBC1D23   | -0.54 | 2.27E-06 | 1.28E-05 | Under-expressed |
| SPTBN1    | -0.54 | 2.57E-06 | 1.43E-05 | Under-expressed |
| KAT6B     | -0.54 | 3.84E-06 | 2.04E-05 | Under-expressed |

|          |       |          |          |                 |
|----------|-------|----------|----------|-----------------|
| USP16    | -0.54 | 4.05E-06 | 2.14E-05 | Under-expressed |
| ABCB10   | -0.54 | 4.86E-06 | 2.50E-05 | Under-expressed |
| ZC3H7B   | -0.54 | 4.91E-06 | 2.53E-05 | Under-expressed |
| AKAP13   | -0.54 | 4.96E-06 | 2.55E-05 | Under-expressed |
| RALBP1   | -0.54 | 7.56E-06 | 3.68E-05 | Under-expressed |
| WDR11    | -0.54 | 1.57E-05 | 6.95E-05 | Under-expressed |
| SLC31A2  | -0.54 | 2.93E-05 | 1.20E-04 | Under-expressed |
| CD46     | -0.54 | 3.74E-05 | 1.48E-04 | Under-expressed |
| MFSD9    | -0.54 | 6.11E-05 | 2.27E-04 | Under-expressed |
| MAP3K20  | -0.54 | 9.47E-05 | 3.34E-04 | Under-expressed |
| TET2     | -0.54 | 1.21E-04 | 4.16E-04 | Under-expressed |
| C21ORF91 | -0.54 | 1.61E-04 | 5.31E-04 | Under-expressed |
| USP6NL   | -0.54 | 1.97E-04 | 6.36E-04 | Under-expressed |
| FAM8A1   | -0.54 | 2.35E-04 | 7.39E-04 | Under-expressed |
| LMO2     | -0.54 | 4.00E-04 | 1.17E-03 | Under-expressed |
| CCP110   | -0.54 | 4.63E-04 | 1.33E-03 | Under-expressed |
| C4ORF33  | -0.54 | 5.60E-04 | 1.57E-03 | Under-expressed |
| IPPK     | -0.54 | 5.75E-04 | 1.61E-03 | Under-expressed |
| PLEKHA6  | -0.54 | 5.87E-04 | 1.63E-03 | Under-expressed |
| PER1     | -0.54 | 9.45E-04 | 2.48E-03 | Under-expressed |
| ALDH4A1  | -0.54 | 1.27E-03 | 3.20E-03 | Under-expressed |
| ZFX      | -0.54 | 1.83E-03 | 4.40E-03 | Under-expressed |
| ZNF493   | -0.54 | 2.03E-03 | 4.82E-03 | Under-expressed |
| PCDH1    | -0.54 | 2.28E-03 | 5.35E-03 | Under-expressed |
| SCHIP1   | -0.54 | 2.90E-03 | 6.61E-03 | Under-expressed |
| ELMO1    | -0.54 | 4.92E-03 | 0.0105   | Under-expressed |
| CD40     | -0.54 | 5.65E-03 | 0.0118   | Under-expressed |
| CIDEB    | -0.54 | 6.89E-03 | 0.0141   | Under-expressed |
| ADGRA2   | -0.54 | 7.20E-03 | 0.0146   | Under-expressed |
| DDIT4    | -0.54 | 0.0121   | 0.023    | Under-expressed |
| PC       | -0.54 | 0.0242   | 0.0424   | Under-expressed |
| SRPRA    | -0.55 | 2.83E-10 | 5.89E-09 | Under-expressed |
| VPS13D   | -0.55 | 4.31E-10 | 8.49E-09 | Under-expressed |
| PRORP    | -0.55 | 2.06E-09 | 3.15E-08 | Under-expressed |
| MIA2     | -0.55 | 3.89E-09 | 5.49E-08 | Under-expressed |
| GINM1    | -0.55 | 8.72E-09 | 1.09E-07 | Under-expressed |
| GLYR1    | -0.55 | 1.97E-08 | 2.21E-07 | Under-expressed |
| SNX18    | -0.55 | 3.70E-08 | 3.82E-07 | Under-expressed |
| USP28    | -0.55 | 2.34E-07 | 1.84E-06 | Under-expressed |
| SMC6     | -0.55 | 2.52E-07 | 1.96E-06 | Under-expressed |
| PPP1R15B | -0.55 | 3.29E-07 | 2.47E-06 | Under-expressed |
| C5ORF24  | -0.55 | 4.67E-07 | 3.32E-06 | Under-expressed |
| THNSL1   | -0.55 | 6.30E-07 | 4.31E-06 | Under-expressed |
| CTR9     | -0.55 | 6.89E-07 | 4.66E-06 | Under-expressed |
| FECH     | -0.55 | 1.23E-06 | 7.62E-06 | Under-expressed |
| CCDC25   | -0.55 | 1.24E-06 | 7.64E-06 | Under-expressed |
| SNX9     | -0.55 | 1.29E-06 | 7.93E-06 | Under-expressed |
| LRP6     | -0.55 | 3.20E-06 | 1.73E-05 | Under-expressed |
| LDLR     | -0.55 | 9.39E-06 | 4.45E-05 | Under-expressed |
| TM7SF3   | -0.55 | 1.73E-05 | 7.56E-05 | Under-expressed |
| GANC     | -0.55 | 1.78E-05 | 7.75E-05 | Under-expressed |
| KHNYN    | -0.55 | 1.81E-05 | 7.87E-05 | Under-expressed |
| PHF6     | -0.55 | 2.34E-05 | 9.83E-05 | Under-expressed |
| CD93     | -0.55 | 2.87E-05 | 1.18E-04 | Under-expressed |
| RNF38    | -0.55 | 3.16E-05 | 1.28E-04 | Under-expressed |
| HEATR5B  | -0.55 | 3.69E-05 | 1.47E-04 | Under-expressed |
| TP53BP2  | -0.55 | 4.47E-05 | 1.73E-04 | Under-expressed |

|            |       |          |          |                 |
|------------|-------|----------|----------|-----------------|
| GABPB1-AS1 | -0.55 | 5.71E-05 | 2.14E-04 | Under-expressed |
| PARP3      | -0.55 | 6.23E-05 | 2.31E-04 | Under-expressed |
| ABCA1      | -0.55 | 3.78E-04 | 1.12E-03 | Under-expressed |
| VPS13A     | -0.55 | 7.05E-04 | 1.92E-03 | Under-expressed |
| MYO5B      | -0.55 | 8.60E-04 | 2.29E-03 | Under-expressed |
| SMARCAD1   | -0.55 | 9.61E-04 | 2.52E-03 | Under-expressed |
| FAM241A    | -0.55 | 1.29E-03 | 3.24E-03 | Under-expressed |
| CD200      | -0.55 | 1.62E-03 | 3.96E-03 | Under-expressed |
| SIMC1      | -0.55 | 2.21E-03 | 5.22E-03 | Under-expressed |
| ZDHHC23    | -0.55 | 2.25E-03 | 5.30E-03 | Under-expressed |
| CBR1       | -0.55 | 2.73E-03 | 6.27E-03 | Under-expressed |
| GCH1       | -0.55 | 3.27E-03 | 7.34E-03 | Under-expressed |
| CEP152     | -0.55 | 5.01E-03 | 0.0106   | Under-expressed |
| HIF1A      | -0.55 | 6.21E-03 | 0.0129   | Under-expressed |
| GLYCTK     | -0.55 | 8.05E-03 | 0.0162   | Under-expressed |
| PXDN       | -0.55 | 8.24E-03 | 0.0165   | Under-expressed |
| PRKN       | -0.55 | 0.0119   | 0.0226   | Under-expressed |
| PTPRM      | -0.55 | 0.0132   | 0.0249   | Under-expressed |
| SUN2       | -0.56 | 8.21E-09 | 1.03E-07 | Under-expressed |
| HERC2      | -0.56 | 1.98E-08 | 2.22E-07 | Under-expressed |
| EXOC5      | -0.56 | 2.32E-08 | 2.54E-07 | Under-expressed |
| NAGA       | -0.56 | 7.20E-07 | 4.83E-06 | Under-expressed |
| TRIM38     | -0.56 | 8.86E-07 | 5.75E-06 | Under-expressed |
| ZC3H6      | -0.56 | 1.46E-06 | 8.80E-06 | Under-expressed |
| MINDY3     | -0.56 | 3.08E-06 | 1.68E-05 | Under-expressed |
| FERMT2     | -0.56 | 3.53E-06 | 1.89E-05 | Under-expressed |
| PTPN11     | -0.56 | 5.88E-06 | 2.96E-05 | Under-expressed |
| SHANK3     | -0.56 | 1.69E-05 | 7.40E-05 | Under-expressed |
| ZCCHC24    | -0.56 | 1.82E-05 | 7.91E-05 | Under-expressed |
| GTF2IRD2B  | -0.56 | 1.93E-05 | 8.31E-05 | Under-expressed |
| PPP2R5E    | -0.56 | 2.17E-05 | 9.22E-05 | Under-expressed |
| PLS3       | -0.56 | 3.45E-05 | 1.39E-04 | Under-expressed |
| C11ORF54   | -0.56 | 3.91E-05 | 1.54E-04 | Under-expressed |
| BBS9       | -0.56 | 4.02E-05 | 1.58E-04 | Under-expressed |
| HELZ2      | -0.56 | 4.59E-05 | 1.77E-04 | Under-expressed |
| MAP3K7CL   | -0.56 | 4.74E-05 | 1.82E-04 | Under-expressed |
| ARHGEF11   | -0.56 | 6.38E-05 | 2.36E-04 | Under-expressed |
| PIK3C2B    | -0.56 | 9.35E-05 | 3.31E-04 | Under-expressed |
| MTUS1      | -0.56 | 1.49E-04 | 4.97E-04 | Under-expressed |
| WRN        | -0.56 | 4.48E-04 | 1.30E-03 | Under-expressed |
| DOP1B      | -0.56 | 5.80E-04 | 1.62E-03 | Under-expressed |
| EGFLAM     | -0.56 | 7.99E-04 | 2.15E-03 | Under-expressed |
| TKFC       | -0.56 | 1.05E-03 | 2.71E-03 | Under-expressed |
| LNP1       | -0.56 | 1.42E-03 | 3.53E-03 | Under-expressed |
| CALHM5     | -0.56 | 1.62E-03 | 3.95E-03 | Under-expressed |
| NUDT7      | -0.56 | 1.86E-03 | 4.45E-03 | Under-expressed |
| PPP1R16B   | -0.56 | 2.10E-03 | 4.99E-03 | Under-expressed |
| TIAM1      | -0.56 | 2.40E-03 | 5.60E-03 | Under-expressed |
| NUDT6      | -0.56 | 2.58E-03 | 5.97E-03 | Under-expressed |
| STARD4     | -0.56 | 2.69E-03 | 6.19E-03 | Under-expressed |
| CARD6      | -0.56 | 3.21E-03 | 7.23E-03 | Under-expressed |
| ARHGAP10   | -0.56 | 4.47E-03 | 9.65E-03 | Under-expressed |
| MSRB3      | -0.56 | 0.0107   | 0.0207   | Under-expressed |
| PROSER3    | -0.56 | 0.0114   | 0.0218   | Under-expressed |
| CBS        | -0.56 | 0.0156   | 0.0288   | Under-expressed |
| GPAT3      | -0.56 | 0.0191   | 0.0345   | Under-expressed |
| MYO7A      | -0.56 | 0.0225   | 0.0398   | Under-expressed |



|           |       |          |          |                 |
|-----------|-------|----------|----------|-----------------|
| FYTTD1    | -0.57 | 7.67E-11 | 1.98E-09 | Under-expressed |
| DAG1      | -0.57 | 8.38E-10 | 1.48E-08 | Under-expressed |
| ZNF654    | -0.57 | 8.99E-10 | 1.56E-08 | Under-expressed |
| SEC22B    | -0.57 | 2.62E-09 | 3.89E-08 | Under-expressed |
| SLC33A1   | -0.57 | 4.55E-09 | 6.25E-08 | Under-expressed |
| MGAT2     | -0.57 | 1.20E-08 | 1.43E-07 | Under-expressed |
| RRN3      | -0.57 | 1.58E-08 | 1.83E-07 | Under-expressed |
| SNX13     | -0.57 | 2.24E-08 | 2.48E-07 | Under-expressed |
| NCOA1     | -0.57 | 3.25E-08 | 3.43E-07 | Under-expressed |
| UTP14C    | -0.57 | 3.84E-08 | 3.95E-07 | Under-expressed |
| MICAL3    | -0.57 | 4.24E-08 | 4.28E-07 | Under-expressed |
| CLPX      | -0.57 | 4.36E-08 | 4.37E-07 | Under-expressed |
| SLC9A6    | -0.57 | 5.35E-08 | 5.24E-07 | Under-expressed |
| MPHOSPH8  | -0.57 | 2.14E-07 | 1.71E-06 | Under-expressed |
| FUCA1     | -0.57 | 2.15E-07 | 1.72E-06 | Under-expressed |
| ZFP1      | -0.57 | 2.27E-07 | 1.80E-06 | Under-expressed |
| ADIPOR2   | -0.57 | 3.31E-07 | 2.48E-06 | Under-expressed |
| UBE3C     | -0.57 | 6.67E-07 | 4.54E-06 | Under-expressed |
| KLF11     | -0.57 | 7.92E-07 | 5.23E-06 | Under-expressed |
| UBXN2B    | -0.57 | 9.48E-07 | 6.09E-06 | Under-expressed |
| KIAA1147  | -0.57 | 4.48E-06 | 2.34E-05 | Under-expressed |
| SLC12A6   | -0.57 | 6.48E-06 | 3.22E-05 | Under-expressed |
| ZNF436    | -0.57 | 8.74E-06 | 4.17E-05 | Under-expressed |
| HSD17B12  | -0.57 | 1.07E-05 | 4.99E-05 | Under-expressed |
| PHLPP2    | -0.57 | 1.58E-05 | 6.99E-05 | Under-expressed |
| KIF16B    | -0.57 | 1.74E-05 | 7.58E-05 | Under-expressed |
| EIF2AK3   | -0.57 | 2.57E-05 | 1.07E-04 | Under-expressed |
| RLF       | -0.57 | 3.62E-05 | 1.44E-04 | Under-expressed |
| RPL23AP53 | -0.57 | 4.28E-05 | 1.67E-04 | Under-expressed |
| TRUB1     | -0.57 | 4.39E-05 | 1.70E-04 | Under-expressed |
| ICK       | -0.57 | 8.50E-05 | 3.04E-04 | Under-expressed |
| BBX       | -0.57 | 1.36E-04 | 4.60E-04 | Under-expressed |
| TNS1      | -0.57 | 1.59E-04 | 5.25E-04 | Under-expressed |
| APLF      | -0.57 | 2.04E-04 | 6.55E-04 | Under-expressed |
| BTN3A1    | -0.57 | 2.63E-04 | 8.14E-04 | Under-expressed |
| GSR       | -0.57 | 3.18E-04 | 9.65E-04 | Under-expressed |
| HTR7P1    | -0.57 | 3.22E-04 | 9.73E-04 | Under-expressed |
| HGSNAT    | -0.57 | 4.55E-04 | 1.32E-03 | Under-expressed |
| DENND1B   | -0.57 | 4.94E-04 | 1.41E-03 | Under-expressed |
| AHR       | -0.57 | 7.46E-04 | 2.02E-03 | Under-expressed |
| BTAF1     | -0.57 | 7.66E-04 | 2.07E-03 | Under-expressed |
| KIF17     | -0.57 | 8.11E-04 | 2.17E-03 | Under-expressed |
| FURIN     | -0.57 | 9.46E-04 | 2.48E-03 | Under-expressed |
| HAGH      | -0.57 | 1.26E-03 | 3.17E-03 | Under-expressed |
| PTPRN2    | -0.57 | 1.96E-03 | 4.67E-03 | Under-expressed |
| OSBPL1A   | -0.57 | 2.73E-03 | 6.28E-03 | Under-expressed |
| TTC39C    | -0.57 | 2.88E-03 | 6.57E-03 | Under-expressed |
| CDH2      | -0.57 | 3.53E-03 | 7.83E-03 | Under-expressed |
| NR5A2     | -0.57 | 3.58E-03 | 7.93E-03 | Under-expressed |
| GPR153    | -0.57 | 3.70E-03 | 8.14E-03 | Under-expressed |
| TNXB      | -0.57 | 6.14E-03 | 0.0127   | Under-expressed |
| EIF4E3    | -0.57 | 6.24E-03 | 0.0129   | Under-expressed |
| SLC26A1   | -0.57 | 7.70E-03 | 0.0155   | Under-expressed |
| KRBA2     | -0.57 | 0.0104   | 0.0203   | Under-expressed |
| FITM1     | -0.57 | 0.015    | 0.0278   | Under-expressed |
| ECHDC3    | -0.57 | 0.0275   | 0.0476   | Under-expressed |
| MYOF      | -0.57 | 0.0282   | 0.0487   | Under-expressed |

|              |       |          |          |                 |
|--------------|-------|----------|----------|-----------------|
| ERMAP        | -0.58 | 1.02E-08 | 1.25E-07 | Under-expressed |
| CYLD         | -0.58 | 2.01E-08 | 2.25E-07 | Under-expressed |
| OGDH         | -0.58 | 1.53E-07 | 1.30E-06 | Under-expressed |
| TNRC6B       | -0.58 | 1.81E-07 | 1.49E-06 | Under-expressed |
| TRIM5        | -0.58 | 2.71E-07 | 2.09E-06 | Under-expressed |
| SPEN         | -0.58 | 6.55E-07 | 4.47E-06 | Under-expressed |
| ATP2A2       | -0.58 | 7.86E-07 | 5.19E-06 | Under-expressed |
| ZFP36L1      | -0.58 | 8.98E-07 | 5.81E-06 | Under-expressed |
| KCTD3        | -0.58 | 1.19E-06 | 7.41E-06 | Under-expressed |
| SH2D3C       | -0.58 | 1.66E-06 | 9.85E-06 | Under-expressed |
| DNAJB14      | -0.58 | 1.91E-06 | 1.11E-05 | Under-expressed |
| MRTFB        | -0.58 | 4.07E-06 | 2.15E-05 | Under-expressed |
| ARL6IP1      | -0.58 | 6.03E-06 | 3.02E-05 | Under-expressed |
| MMAA         | -0.58 | 7.62E-06 | 3.71E-05 | Under-expressed |
| CBX7         | -0.58 | 8.99E-06 | 4.28E-05 | Under-expressed |
| LMAN1        | -0.58 | 1.35E-05 | 6.09E-05 | Under-expressed |
| SWAP70       | -0.58 | 1.50E-05 | 6.66E-05 | Under-expressed |
| MAPRE3       | -0.58 | 2.18E-05 | 9.26E-05 | Under-expressed |
| STXBP3       | -0.58 | 2.57E-05 | 1.07E-04 | Under-expressed |
| CLDN23       | -0.58 | 1.20E-04 | 4.11E-04 | Under-expressed |
| PAPOLG       | -0.58 | 1.40E-04 | 4.70E-04 | Under-expressed |
| LGR4         | -0.58 | 1.57E-04 | 5.20E-04 | Under-expressed |
| MOCS1        | -0.58 | 1.64E-04 | 5.38E-04 | Under-expressed |
| AP1AR        | -0.58 | 2.17E-04 | 6.89E-04 | Under-expressed |
| JAZF1        | -0.58 | 3.28E-04 | 9.88E-04 | Under-expressed |
| RNF128       | -0.58 | 3.66E-04 | 1.09E-03 | Under-expressed |
| TESK2        | -0.58 | 4.93E-04 | 1.41E-03 | Under-expressed |
| SERPING1     | -0.58 | 7.80E-04 | 2.10E-03 | Under-expressed |
| ACBD4        | -0.58 | 1.01E-03 | 2.62E-03 | Under-expressed |
| RNLS         | -0.58 | 1.04E-03 | 2.69E-03 | Under-expressed |
| SLC35C1      | -0.58 | 1.10E-03 | 2.81E-03 | Under-expressed |
| C1RL-AS1     | -0.58 | 1.24E-03 | 3.13E-03 | Under-expressed |
| LOC100133331 | -0.58 | 2.99E-03 | 6.79E-03 | Under-expressed |
| NAV2         | -0.58 | 7.94E-03 | 0.016    | Under-expressed |
| CSNK2A3      | -0.58 | 8.12E-03 | 0.0163   | Under-expressed |
| TMEM176B     | -0.58 | 0.0128   | 0.0242   | Under-expressed |
| USP32        | -0.59 | 2.73E-09 | 4.05E-08 | Under-expressed |
| LNX2         | -0.59 | 1.89E-08 | 2.15E-07 | Under-expressed |
| ABHD17B      | -0.59 | 2.49E-08 | 2.71E-07 | Under-expressed |
| SCARF1       | -0.59 | 7.35E-08 | 6.83E-07 | Under-expressed |
| RNF6         | -0.59 | 8.59E-08 | 7.85E-07 | Under-expressed |
| TOGARAM1     | -0.59 | 1.02E-06 | 6.49E-06 | Under-expressed |
| SUCLG2       | -0.59 | 1.89E-06 | 1.10E-05 | Under-expressed |
| PDLIM5       | -0.59 | 2.44E-06 | 1.37E-05 | Under-expressed |
| UFL1         | -0.59 | 2.95E-06 | 1.62E-05 | Under-expressed |
| SMC1A        | -0.59 | 3.18E-06 | 1.72E-05 | Under-expressed |
| PPIP5K2      | -0.59 | 3.31E-06 | 1.78E-05 | Under-expressed |
| ANKRD17      | -0.59 | 4.40E-06 | 2.30E-05 | Under-expressed |
| USP25        | -0.59 | 1.43E-05 | 6.42E-05 | Under-expressed |
| CNN3         | -0.59 | 1.44E-05 | 6.42E-05 | Under-expressed |
| CLCN4        | -0.59 | 1.49E-05 | 6.63E-05 | Under-expressed |
| ITPRIP       | -0.59 | 2.20E-05 | 9.31E-05 | Under-expressed |
| ANKRA2       | -0.59 | 2.59E-05 | 1.08E-04 | Under-expressed |
| FOXN2        | -0.59 | 2.73E-05 | 1.13E-04 | Under-expressed |
| ATXN7L1      | -0.59 | 4.18E-05 | 1.63E-04 | Under-expressed |
| STARD13      | -0.59 | 6.22E-05 | 2.31E-04 | Under-expressed |
| TMEM255B     | -0.59 | 1.29E-04 | 4.39E-04 | Under-expressed |

|          |       |          |          |                 |
|----------|-------|----------|----------|-----------------|
| PYGL     | -0.59 | 1.57E-04 | 5.20E-04 | Under-expressed |
| ZEB2     | -0.59 | 2.16E-04 | 6.88E-04 | Under-expressed |
| ECHDC2   | -0.59 | 2.23E-04 | 7.06E-04 | Under-expressed |
| SORBS1   | -0.59 | 2.36E-04 | 7.40E-04 | Under-expressed |
| NOTCH2   | -0.59 | 3.43E-04 | 1.03E-03 | Under-expressed |
| PPP2R1B  | -0.59 | 4.17E-04 | 1.22E-03 | Under-expressed |
| CTSF     | -0.59 | 5.37E-04 | 1.52E-03 | Under-expressed |
| RCL1     | -0.59 | 7.43E-04 | 2.01E-03 | Under-expressed |
| TSPAN18  | -0.59 | 8.75E-04 | 2.32E-03 | Under-expressed |
| TWSG1    | -0.59 | 8.90E-04 | 2.35E-03 | Under-expressed |
| SCCPDH   | -0.59 | 9.27E-04 | 2.44E-03 | Under-expressed |
| TBC1D19  | -0.59 | 9.67E-04 | 2.53E-03 | Under-expressed |
| ZNF596   | -0.59 | 9.94E-04 | 2.59E-03 | Under-expressed |
| ANKEF1   | -0.59 | 1.14E-03 | 2.91E-03 | Under-expressed |
| ARSG     | -0.59 | 2.71E-03 | 6.24E-03 | Under-expressed |
| TTN      | -0.59 | 5.28E-03 | 0.0111   | Under-expressed |
| C1ORF21  | -0.59 | 0.0113   | 0.0217   | Under-expressed |
| LILRB5   | -0.59 | 0.0116   | 0.0222   | Under-expressed |
| GLDC     | -0.59 | 0.0208   | 0.0371   | Under-expressed |
| ETV1     | -0.59 | 0.0268   | 0.0466   | Under-expressed |
| NPR2     | -0.59 | 0.0285   | 0.0491   | Under-expressed |
| OPA1     | -0.6  | 3.96E-13 | 2.06E-11 | Under-expressed |
| PDXDC1   | -0.6  | 5.47E-10 | 1.03E-08 | Under-expressed |
| TNRC6A   | -0.6  | 1.13E-09 | 1.90E-08 | Under-expressed |
| NR1D2    | -0.6  | 6.60E-09 | 8.63E-08 | Under-expressed |
| IDH1     | -0.6  | 2.93E-08 | 3.12E-07 | Under-expressed |
| LARS2    | -0.6  | 3.39E-08 | 3.54E-07 | Under-expressed |
| FBXL3    | -0.6  | 5.76E-08 | 5.53E-07 | Under-expressed |
| UCHL5    | -0.6  | 6.49E-08 | 6.13E-07 | Under-expressed |
| SNX4     | -0.6  | 9.70E-08 | 8.71E-07 | Under-expressed |
| TGOLN2   | -0.6  | 1.48E-07 | 1.26E-06 | Under-expressed |
| ADCY9    | -0.6  | 2.17E-07 | 1.73E-06 | Under-expressed |
| DCBLD1   | -0.6  | 2.22E-07 | 1.77E-06 | Under-expressed |
| ISOC1    | -0.6  | 9.24E-07 | 5.96E-06 | Under-expressed |
| RC3H2    | -0.6  | 1.42E-06 | 8.56E-06 | Under-expressed |
| ZNF25    | -0.6  | 1.61E-06 | 9.61E-06 | Under-expressed |
| FCHO2    | -0.6  | 1.62E-06 | 9.67E-06 | Under-expressed |
| PATL1    | -0.6  | 1.95E-06 | 1.13E-05 | Under-expressed |
| ZNF397   | -0.6  | 2.05E-06 | 1.18E-05 | Under-expressed |
| ARID4A   | -0.6  | 2.97E-06 | 1.63E-05 | Under-expressed |
| OXR1     | -0.6  | 1.13E-05 | 5.22E-05 | Under-expressed |
| WIPF2    | -0.6  | 1.47E-05 | 6.54E-05 | Under-expressed |
| SLC35F5  | -0.6  | 1.60E-05 | 7.06E-05 | Under-expressed |
| KLLN     | -0.6  | 2.30E-05 | 9.70E-05 | Under-expressed |
| ARHGEF15 | -0.6  | 2.73E-05 | 1.13E-04 | Under-expressed |
| ACOT2    | -0.6  | 9.72E-05 | 3.42E-04 | Under-expressed |
| TEAD1    | -0.6  | 1.10E-04 | 3.80E-04 | Under-expressed |
| HLX      | -0.6  | 2.27E-04 | 7.16E-04 | Under-expressed |
| FAM126A  | -0.6  | 3.00E-04 | 9.14E-04 | Under-expressed |
| PPM1K    | -0.6  | 5.39E-04 | 1.52E-03 | Under-expressed |
| FAM111B  | -0.6  | 6.24E-04 | 1.72E-03 | Under-expressed |
| IL7      | -0.6  | 1.60E-03 | 3.91E-03 | Under-expressed |
| TRMT11   | -0.6  | 1.71E-03 | 4.16E-03 | Under-expressed |
| CPLANE1  | -0.6  | 2.20E-03 | 5.19E-03 | Under-expressed |
| CHN1     | -0.6  | 2.22E-03 | 5.23E-03 | Under-expressed |
| FAM47E   | -0.6  | 5.23E-03 | 0.011    | Under-expressed |
| TRIB2    | -0.6  | 5.53E-03 | 0.0116   | Under-expressed |

|           |       |          |          |                 |
|-----------|-------|----------|----------|-----------------|
| FAXDC2    | -0.6  | 6.34E-03 | 0.0131   | Under-expressed |
| KIF21B    | -0.6  | 6.82E-03 | 0.014    | Under-expressed |
| OCLN      | -0.6  | 7.18E-03 | 0.0146   | Under-expressed |
| PLAT      | -0.6  | 0.0122   | 0.0231   | Under-expressed |
| LTBP4     | -0.6  | 0.0146   | 0.0272   | Under-expressed |
| IFI44L    | -0.6  | 0.0216   | 0.0383   | Under-expressed |
| WDTC1     | -0.61 | 9.67E-10 | 1.66E-08 | Under-expressed |
| FAM122A   | -0.61 | 1.65E-09 | 2.61E-08 | Under-expressed |
| MCCC2     | -0.61 | 3.98E-08 | 4.07E-07 | Under-expressed |
| MTOR      | -0.61 | 3.99E-08 | 4.08E-07 | Under-expressed |
| ITFG1     | -0.61 | 5.10E-07 | 3.59E-06 | Under-expressed |
| BTB       | -0.61 | 1.21E-06 | 7.48E-06 | Under-expressed |
| CEP104    | -0.61 | 1.35E-06 | 8.22E-06 | Under-expressed |
| BMI1      | -0.61 | 1.38E-06 | 8.37E-06 | Under-expressed |
| KDM7A     | -0.61 | 1.64E-06 | 9.76E-06 | Under-expressed |
| CD99L2    | -0.61 | 3.30E-06 | 1.78E-05 | Under-expressed |
| AQR       | -0.61 | 3.44E-06 | 1.85E-05 | Under-expressed |
| HLTF      | -0.61 | 1.34E-05 | 6.04E-05 | Under-expressed |
| PGM1      | -0.61 | 1.77E-05 | 7.71E-05 | Under-expressed |
| CDKN2AIP  | -0.61 | 2.68E-05 | 1.11E-04 | Under-expressed |
| CCNT2     | -0.61 | 4.15E-05 | 1.63E-04 | Under-expressed |
| ETS2      | -0.61 | 8.68E-05 | 3.10E-04 | Under-expressed |
| ZNF268    | -0.61 | 1.26E-04 | 4.30E-04 | Under-expressed |
| EMBP1     | -0.61 | 1.98E-04 | 6.38E-04 | Under-expressed |
| NLN       | -0.61 | 2.99E-04 | 9.12E-04 | Under-expressed |
| FGD5      | -0.61 | 3.07E-04 | 9.35E-04 | Under-expressed |
| NHSL1     | -0.61 | 3.17E-04 | 9.60E-04 | Under-expressed |
| ZNF460    | -0.61 | 4.73E-04 | 1.36E-03 | Under-expressed |
| ABCA2     | -0.61 | 6.09E-04 | 1.69E-03 | Under-expressed |
| SLC8A1    | -0.61 | 1.07E-03 | 2.75E-03 | Under-expressed |
| CDC14A    | -0.61 | 1.09E-03 | 2.79E-03 | Under-expressed |
| ZNF136    | -0.61 | 1.13E-03 | 2.88E-03 | Under-expressed |
| ACOT4     | -0.61 | 1.34E-03 | 3.36E-03 | Under-expressed |
| STS       | -0.61 | 1.37E-03 | 3.42E-03 | Under-expressed |
| ZMAT3     | -0.61 | 1.46E-03 | 3.61E-03 | Under-expressed |
| SAMD9L    | -0.61 | 1.64E-03 | 3.99E-03 | Under-expressed |
| TNFSF10   | -0.61 | 1.84E-03 | 4.42E-03 | Under-expressed |
| HERC6     | -0.61 | 2.28E-03 | 5.35E-03 | Under-expressed |
| ADAM17    | -0.61 | 3.53E-03 | 7.83E-03 | Under-expressed |
| RCAN2     | -0.61 | 5.58E-03 | 0.0117   | Under-expressed |
| HSP90AB2P | -0.61 | 0.0118   | 0.0226   | Under-expressed |
| EFCAB14   | -0.62 | 4.10E-11 | 1.16E-09 | Under-expressed |
| C2ORF69   | -0.62 | 5.79E-10 | 1.08E-08 | Under-expressed |
| MGRN1     | -0.62 | 1.77E-09 | 2.77E-08 | Under-expressed |
| UBR3      | -0.62 | 1.86E-09 | 2.89E-08 | Under-expressed |
| PEX19     | -0.62 | 2.26E-09 | 3.43E-08 | Under-expressed |
| ATG4C     | -0.62 | 1.42E-08 | 1.66E-07 | Under-expressed |
| ZNF800    | -0.62 | 3.32E-08 | 3.48E-07 | Under-expressed |
| CLIP1     | -0.62 | 4.41E-08 | 4.41E-07 | Under-expressed |
| ATF6      | -0.62 | 6.05E-08 | 5.78E-07 | Under-expressed |
| ITSN2     | -0.62 | 9.46E-08 | 8.53E-07 | Under-expressed |
| ZNRF2     | -0.62 | 1.35E-07 | 1.17E-06 | Under-expressed |
| PIGK      | -0.62 | 1.50E-07 | 1.28E-06 | Under-expressed |
| PKN2      | -0.62 | 7.32E-07 | 4.90E-06 | Under-expressed |
| TMED7     | -0.62 | 1.05E-06 | 6.65E-06 | Under-expressed |
| LRP5      | -0.62 | 1.11E-06 | 6.96E-06 | Under-expressed |
| HIGD1A    | -0.62 | 1.13E-06 | 7.06E-06 | Under-expressed |

|          |       |          |          |                 |
|----------|-------|----------|----------|-----------------|
| TMED4    | -0.62 | 1.27E-06 | 7.78E-06 | Under-expressed |
| PLPBP    | -0.62 | 1.43E-06 | 8.62E-06 | Under-expressed |
| EDEM3    | -0.62 | 1.50E-06 | 9.03E-06 | Under-expressed |
| PRCP     | -0.62 | 2.06E-06 | 1.18E-05 | Under-expressed |
| IGF2R    | -0.62 | 2.51E-06 | 1.40E-05 | Under-expressed |
| CENPC    | -0.62 | 4.71E-06 | 2.44E-05 | Under-expressed |
| CHM      | -0.62 | 5.49E-06 | 2.78E-05 | Under-expressed |
| FOXO1    | -0.62 | 7.44E-06 | 3.63E-05 | Under-expressed |
| USP18    | -0.62 | 9.69E-05 | 3.41E-04 | Under-expressed |
| GCLC     | -0.62 | 9.90E-05 | 3.47E-04 | Under-expressed |
| ALDH1B1  | -0.62 | 1.07E-04 | 3.71E-04 | Under-expressed |
| FKBP7    | -0.62 | 1.13E-04 | 3.91E-04 | Under-expressed |
| CISH     | -0.62 | 1.81E-04 | 5.89E-04 | Under-expressed |
| ZFP36    | -0.62 | 5.14E-04 | 1.46E-03 | Under-expressed |
| VHL      | -0.62 | 5.87E-04 | 1.63E-03 | Under-expressed |
| MRVI1    | -0.62 | 7.19E-04 | 1.96E-03 | Under-expressed |
| MTCP1    | -0.62 | 1.03E-03 | 2.67E-03 | Under-expressed |
| SPIN4    | -0.62 | 1.46E-03 | 3.61E-03 | Under-expressed |
| NOTCH3   | -0.62 | 2.06E-03 | 4.89E-03 | Under-expressed |
| GBP4     | -0.62 | 2.52E-03 | 5.85E-03 | Under-expressed |
| RSAD2    | -0.62 | 3.23E-03 | 7.27E-03 | Under-expressed |
| OAS2     | -0.62 | 4.05E-03 | 8.84E-03 | Under-expressed |
| RBL1     | -0.62 | 5.52E-03 | 0.0116   | Under-expressed |
| CRIM1    | -0.62 | 0.0124   | 0.0235   | Under-expressed |
| FOXC1    | -0.62 | 0.0164   | 0.0301   | Under-expressed |
| SLC35A5  | -0.63 | 5.92E-12 | 2.16E-10 | Under-expressed |
| NHLRC3   | -0.63 | 3.11E-09 | 4.53E-08 | Under-expressed |
| RMND5A   | -0.63 | 8.85E-09 | 1.10E-07 | Under-expressed |
| SERINC1  | -0.63 | 1.61E-07 | 1.35E-06 | Under-expressed |
| PEX12    | -0.63 | 1.66E-07 | 1.39E-06 | Under-expressed |
| UBR1     | -0.63 | 1.81E-07 | 1.49E-06 | Under-expressed |
| OSBPL8   | -0.63 | 2.67E-07 | 2.06E-06 | Under-expressed |
| TBC1D2B  | -0.63 | 3.53E-07 | 2.62E-06 | Under-expressed |
| EPB41    | -0.63 | 3.87E-07 | 2.82E-06 | Under-expressed |
| ATG2B    | -0.63 | 4.60E-07 | 3.29E-06 | Under-expressed |
| PTK2B    | -0.63 | 6.98E-07 | 4.70E-06 | Under-expressed |
| ERBIN    | -0.63 | 8.42E-07 | 5.50E-06 | Under-expressed |
| TJP1     | -0.63 | 1.89E-06 | 1.10E-05 | Under-expressed |
| PRKACB   | -0.63 | 1.98E-06 | 1.15E-05 | Under-expressed |
| FBXO3    | -0.63 | 2.66E-06 | 1.48E-05 | Under-expressed |
| FAM107B  | -0.63 | 3.88E-06 | 2.06E-05 | Under-expressed |
| CCM2L    | -0.63 | 2.45E-05 | 1.02E-04 | Under-expressed |
| CEP76    | -0.63 | 3.61E-05 | 1.44E-04 | Under-expressed |
| GRHPR    | -0.63 | 3.82E-05 | 1.51E-04 | Under-expressed |
| TRMT2B   | -0.63 | 6.32E-05 | 2.34E-04 | Under-expressed |
| KMT2E    | -0.63 | 8.24E-05 | 2.96E-04 | Under-expressed |
| GPR155   | -0.63 | 1.24E-04 | 4.25E-04 | Under-expressed |
| SLC23A2  | -0.63 | 1.35E-04 | 4.56E-04 | Under-expressed |
| FKBP14   | -0.63 | 3.11E-04 | 9.44E-04 | Under-expressed |
| KRT222   | -0.63 | 5.92E-04 | 1.64E-03 | Under-expressed |
| B4GALT6  | -0.63 | 1.41E-03 | 3.51E-03 | Under-expressed |
| MOCOS    | -0.63 | 1.83E-03 | 4.40E-03 | Under-expressed |
| KCNMA1   | -0.63 | 2.35E-03 | 5.49E-03 | Under-expressed |
| KCNN3    | -0.63 | 3.36E-03 | 7.53E-03 | Under-expressed |
| ZDHHC2   | -0.63 | 4.38E-03 | 9.48E-03 | Under-expressed |
| SERPINF1 | -0.63 | 0.0104   | 0.0202   | Under-expressed |
| SKIDA1   | -0.63 | 0.0109   | 0.0211   | Under-expressed |

|           |       |          |          |                 |
|-----------|-------|----------|----------|-----------------|
| PIK3CG    | -0.63 | 0.0157   | 0.029    | Under-expressed |
| GFM1      | -0.64 | 4.29E-15 | 3.86E-13 | Under-expressed |
| ABHD5     | -0.64 | 1.72E-10 | 3.87E-09 | Under-expressed |
| EDEM1     | -0.64 | 5.58E-09 | 7.46E-08 | Under-expressed |
| NR3C1     | -0.64 | 7.42E-09 | 9.53E-08 | Under-expressed |
| COG3      | -0.64 | 1.26E-08 | 1.50E-07 | Under-expressed |
| UBL3      | -0.64 | 2.41E-08 | 2.63E-07 | Under-expressed |
| BIRC6     | -0.64 | 5.14E-08 | 5.06E-07 | Under-expressed |
| ROCK1     | -0.64 | 8.89E-08 | 8.09E-07 | Under-expressed |
| NOTCH4    | -0.64 | 9.95E-08 | 8.89E-07 | Under-expressed |
| FMR1      | -0.64 | 1.22E-07 | 1.07E-06 | Under-expressed |
| APBB2     | -0.64 | 1.59E-07 | 1.34E-06 | Under-expressed |
| DMXL1     | -0.64 | 2.52E-07 | 1.96E-06 | Under-expressed |
| ZCCHC14   | -0.64 | 3.22E-07 | 2.42E-06 | Under-expressed |
| TTC17     | -0.64 | 3.93E-07 | 2.86E-06 | Under-expressed |
| FOXN3     | -0.64 | 3.99E-07 | 2.90E-06 | Under-expressed |
| PEPD      | -0.64 | 5.03E-07 | 3.55E-06 | Under-expressed |
| TUBE1     | -0.64 | 5.55E-07 | 3.87E-06 | Under-expressed |
| CCDC82    | -0.64 | 9.08E-07 | 5.87E-06 | Under-expressed |
| IRF2      | -0.64 | 1.08E-06 | 6.82E-06 | Under-expressed |
| CASTOR1   | -0.64 | 3.71E-06 | 1.98E-05 | Under-expressed |
| ZHX1      | -0.64 | 4.30E-06 | 2.26E-05 | Under-expressed |
| LATS2     | -0.64 | 4.94E-06 | 2.54E-05 | Under-expressed |
| SKI       | -0.64 | 5.22E-06 | 2.66E-05 | Under-expressed |
| BBS10     | -0.64 | 8.71E-06 | 4.17E-05 | Under-expressed |
| MTSS1     | -0.64 | 1.15E-05 | 5.29E-05 | Under-expressed |
| COG6      | -0.64 | 1.69E-05 | 7.43E-05 | Under-expressed |
| DISP1     | -0.64 | 1.84E-05 | 7.96E-05 | Under-expressed |
| MBNL2     | -0.64 | 1.88E-05 | 8.10E-05 | Under-expressed |
| PHF8      | -0.64 | 2.38E-05 | 1.00E-04 | Under-expressed |
| JDP2      | -0.64 | 2.53E-05 | 1.05E-04 | Under-expressed |
| KLF12     | -0.64 | 1.31E-04 | 4.45E-04 | Under-expressed |
| SH3BGRL2  | -0.64 | 1.38E-04 | 4.63E-04 | Under-expressed |
| TIGD2     | -0.64 | 1.94E-04 | 6.29E-04 | Under-expressed |
| IL1R1     | -0.64 | 2.99E-04 | 9.12E-04 | Under-expressed |
| SLC25A25  | -0.64 | 3.48E-04 | 1.04E-03 | Under-expressed |
| ZNF396    | -0.64 | 3.57E-04 | 1.07E-03 | Under-expressed |
| TRAF3IP2  | -0.64 | 4.85E-04 | 1.39E-03 | Under-expressed |
| CDKN1A    | -0.64 | 3.53E-03 | 7.84E-03 | Under-expressed |
| WWTR1     | -0.64 | 5.20E-03 | 0.011    | Under-expressed |
| EDN1      | -0.64 | 5.91E-03 | 0.0123   | Under-expressed |
| DTX4      | -0.64 | 9.70E-03 | 0.019    | Under-expressed |
| FRZB      | -0.64 | 0.0104   | 0.0203   | Under-expressed |
| PHKA1     | -0.64 | 0.0198   | 0.0355   | Under-expressed |
| BDKRB2    | -0.64 | 0.0245   | 0.0429   | Under-expressed |
| MTMR6     | -0.65 | 1.03E-09 | 1.77E-08 | Under-expressed |
| LIMD1     | -0.65 | 1.46E-09 | 2.36E-08 | Under-expressed |
| SCRN3     | -0.65 | 1.73E-09 | 2.71E-08 | Under-expressed |
| CNST      | -0.65 | 4.85E-09 | 6.61E-08 | Under-expressed |
| SUOX      | -0.65 | 4.66E-08 | 4.62E-07 | Under-expressed |
| PTAR1     | -0.65 | 5.24E-08 | 5.14E-07 | Under-expressed |
| UHRF1BP1L | -0.65 | 1.92E-07 | 1.56E-06 | Under-expressed |
| ATXN7     | -0.65 | 2.30E-07 | 1.81E-06 | Under-expressed |
| UBXN4     | -0.65 | 3.37E-07 | 2.51E-06 | Under-expressed |
| CDC37L1   | -0.65 | 4.82E-07 | 3.42E-06 | Under-expressed |
| FN1       | -0.65 | 5.61E-07 | 3.90E-06 | Under-expressed |
| YTHDC2    | -0.65 | 9.08E-07 | 5.87E-06 | Under-expressed |

|          |       |          |          |                 |
|----------|-------|----------|----------|-----------------|
| RSF1     | -0.65 | 1.13E-06 | 7.06E-06 | Under-expressed |
| UBE2H    | -0.65 | 1.17E-06 | 7.25E-06 | Under-expressed |
| HSDL2    | -0.65 | 2.97E-06 | 1.63E-05 | Under-expressed |
| ARMT1    | -0.65 | 4.64E-06 | 2.41E-05 | Under-expressed |
| SDC1     | -0.65 | 1.34E-05 | 6.04E-05 | Under-expressed |
| LMO7     | -0.65 | 1.73E-05 | 7.54E-05 | Under-expressed |
| LDLRAD4  | -0.65 | 3.02E-05 | 1.23E-04 | Under-expressed |
| WDR47    | -0.65 | 3.49E-05 | 1.40E-04 | Under-expressed |
| NPHP3    | -0.65 | 4.34E-05 | 1.69E-04 | Under-expressed |
| SUSD6    | -0.65 | 4.38E-05 | 1.70E-04 | Under-expressed |
| SGK3     | -0.65 | 4.65E-05 | 1.79E-04 | Under-expressed |
| SH3BGRL  | -0.65 | 4.69E-05 | 1.80E-04 | Under-expressed |
| POR      | -0.65 | 5.89E-05 | 2.21E-04 | Under-expressed |
| ZNF217   | -0.65 | 2.07E-04 | 6.62E-04 | Under-expressed |
| COL4A1   | -0.65 | 2.88E-04 | 8.81E-04 | Under-expressed |
| TAF2     | -0.65 | 3.23E-04 | 9.75E-04 | Under-expressed |
| A1BG-AS1 | -0.65 | 3.59E-04 | 1.07E-03 | Under-expressed |
| TCAF1    | -0.65 | 7.01E-04 | 1.91E-03 | Under-expressed |
| RNASE4   | -0.65 | 8.71E-04 | 2.31E-03 | Under-expressed |
| SLFN5    | -0.65 | 1.11E-03 | 2.84E-03 | Under-expressed |
| ATP7B    | -0.65 | 1.23E-03 | 3.10E-03 | Under-expressed |
| ADAMTSL4 | -0.65 | 1.32E-03 | 3.30E-03 | Under-expressed |
| PAMR1    | -0.65 | 2.16E-03 | 5.10E-03 | Under-expressed |
| FAAH     | -0.65 | 2.31E-03 | 5.42E-03 | Under-expressed |
| TNFSF13  | -0.65 | 3.85E-03 | 8.44E-03 | Under-expressed |
| FGD1     | -0.65 | 6.22E-03 | 0.0129   | Under-expressed |
| ANTXR1   | -0.65 | 0.0113   | 0.0216   | Under-expressed |
| GADD45G  | -0.65 | 0.0186   | 0.0336   | Under-expressed |
| KCTD21   | -0.66 | 8.79E-10 | 1.53E-08 | Under-expressed |
| TRIP11   | -0.66 | 1.10E-09 | 1.86E-08 | Under-expressed |
| NDUFS1   | -0.66 | 1.60E-09 | 2.53E-08 | Under-expressed |
| BCAR3    | -0.66 | 4.28E-09 | 5.94E-08 | Under-expressed |
| TRIM62   | -0.66 | 7.76E-09 | 9.86E-08 | Under-expressed |
| TOPORS   | -0.66 | 2.42E-08 | 2.64E-07 | Under-expressed |
| PEX26    | -0.66 | 1.63E-07 | 1.37E-06 | Under-expressed |
| PPFIA1   | -0.66 | 2.78E-07 | 2.13E-06 | Under-expressed |
| EPM2A    | -0.66 | 5.19E-07 | 3.64E-06 | Under-expressed |
| ZNF720   | -0.66 | 5.28E-07 | 3.69E-06 | Under-expressed |
| RMI1     | -0.66 | 8.27E-07 | 5.42E-06 | Under-expressed |
| KLHL24   | -0.66 | 1.03E-06 | 6.53E-06 | Under-expressed |
| COL18A1  | -0.66 | 2.07E-06 | 1.19E-05 | Under-expressed |
| TUT7     | -0.66 | 3.37E-06 | 1.81E-05 | Under-expressed |
| GIMAP8   | -0.66 | 4.69E-06 | 2.43E-05 | Under-expressed |
| TGFBR2   | -0.66 | 4.81E-06 | 2.48E-05 | Under-expressed |
| PHF2     | -0.66 | 7.00E-06 | 3.44E-05 | Under-expressed |
| RDX      | -0.66 | 7.18E-06 | 3.52E-05 | Under-expressed |
| TCF4     | -0.66 | 8.12E-06 | 3.91E-05 | Under-expressed |
| CFL2     | -0.66 | 9.25E-06 | 4.39E-05 | Under-expressed |
| ZNF684   | -0.66 | 1.44E-05 | 6.42E-05 | Under-expressed |
| SPRED2   | -0.66 | 2.30E-05 | 9.70E-05 | Under-expressed |
| ENG      | -0.66 | 3.05E-05 | 1.24E-04 | Under-expressed |
| SRFBP1   | -0.66 | 5.69E-05 | 2.14E-04 | Under-expressed |
| PANK1    | -0.66 | 8.01E-05 | 2.89E-04 | Under-expressed |
| CYTH3    | -0.66 | 1.03E-04 | 3.59E-04 | Under-expressed |
| STAG3L2  | -0.66 | 4.78E-04 | 1.37E-03 | Under-expressed |
| COPZ2    | -0.66 | 1.84E-03 | 4.41E-03 | Under-expressed |
| SNRK     | -0.67 | 6.51E-12 | 2.35E-10 | Under-expressed |

|             |       |          |          |                 |
|-------------|-------|----------|----------|-----------------|
| TAOK3       | -0.67 | 1.95E-09 | 3.01E-08 | Under-expressed |
| PPP1R12B    | -0.67 | 3.01E-09 | 4.39E-08 | Under-expressed |
| DNAJC25     | -0.67 | 1.97E-08 | 2.21E-07 | Under-expressed |
| FBXO8       | -0.67 | 3.70E-08 | 3.82E-07 | Under-expressed |
| SPG11       | -0.67 | 4.58E-08 | 4.55E-07 | Under-expressed |
| PJA2        | -0.67 | 6.21E-08 | 5.90E-07 | Under-expressed |
| ZNF75D      | -0.67 | 7.07E-08 | 6.62E-07 | Under-expressed |
| RANBP6      | -0.67 | 1.40E-07 | 1.20E-06 | Under-expressed |
| BMPR2       | -0.67 | 8.79E-07 | 5.72E-06 | Under-expressed |
| NSUN6       | -0.67 | 9.19E-07 | 5.93E-06 | Under-expressed |
| OAF         | -0.67 | 1.43E-06 | 8.62E-06 | Under-expressed |
| B3GNT2      | -0.67 | 1.63E-06 | 9.71E-06 | Under-expressed |
| TNS3        | -0.67 | 1.89E-06 | 1.10E-05 | Under-expressed |
| VPS13C      | -0.67 | 1.99E-06 | 1.15E-05 | Under-expressed |
| THRA        | -0.67 | 3.45E-06 | 1.85E-05 | Under-expressed |
| SAMD8       | -0.67 | 3.71E-06 | 1.98E-05 | Under-expressed |
| BLZF1       | -0.67 | 5.39E-06 | 2.74E-05 | Under-expressed |
| AKAP9       | -0.67 | 9.28E-06 | 4.40E-05 | Under-expressed |
| RGL1        | -0.67 | 9.49E-06 | 4.49E-05 | Under-expressed |
| INTS2       | -0.67 | 9.69E-06 | 4.57E-05 | Under-expressed |
| PTPN21      | -0.67 | 1.05E-05 | 4.90E-05 | Under-expressed |
| MDM1        | -0.67 | 1.28E-05 | 5.83E-05 | Under-expressed |
| ZNF776      | -0.67 | 1.56E-05 | 6.88E-05 | Under-expressed |
| MOB1A       | -0.67 | 1.87E-05 | 8.07E-05 | Under-expressed |
| C3ORF18     | -0.67 | 2.01E-05 | 8.62E-05 | Under-expressed |
| ACAD11      | -0.67 | 2.66E-05 | 1.10E-04 | Under-expressed |
| IFIT3       | -0.67 | 4.36E-05 | 1.69E-04 | Under-expressed |
| DHX58       | -0.67 | 4.41E-05 | 1.71E-04 | Under-expressed |
| CSAD        | -0.67 | 8.45E-05 | 3.03E-04 | Under-expressed |
| IGFBP4      | -0.67 | 1.38E-04 | 4.63E-04 | Under-expressed |
| TMEM170B    | -0.67 | 1.40E-04 | 4.69E-04 | Under-expressed |
| RNF152      | -0.67 | 1.58E-04 | 5.22E-04 | Under-expressed |
| IRAK3       | -0.67 | 4.75E-04 | 1.36E-03 | Under-expressed |
| FRMD6       | -0.67 | 9.07E-04 | 2.39E-03 | Under-expressed |
| PLCXD2      | -0.67 | 1.02E-03 | 2.64E-03 | Under-expressed |
| LNX1        | -0.67 | 1.16E-03 | 2.96E-03 | Under-expressed |
| DUSP1       | -0.67 | 1.50E-03 | 3.69E-03 | Under-expressed |
| CSF1        | -0.67 | 4.25E-03 | 9.21E-03 | Under-expressed |
| GPRIN3      | -0.67 | 4.57E-03 | 9.84E-03 | Under-expressed |
| ALS2CL      | -0.67 | 4.92E-03 | 0.0105   | Under-expressed |
| CIART       | -0.67 | 9.39E-03 | 0.0185   | Under-expressed |
| APC         | -0.68 | 1.46E-09 | 2.35E-08 | Under-expressed |
| TBC1D24     | -0.68 | 2.66E-09 | 3.95E-08 | Under-expressed |
| SOCS6       | -0.68 | 1.26E-08 | 1.50E-07 | Under-expressed |
| PALM2-AKAP2 | -0.68 | 1.91E-08 | 2.16E-07 | Under-expressed |
| SEC23A      | -0.68 | 1.84E-07 | 1.50E-06 | Under-expressed |
| LARP1B      | -0.68 | 1.95E-07 | 1.58E-06 | Under-expressed |
| LNPBK       | -0.68 | 3.39E-07 | 2.53E-06 | Under-expressed |
| ARHGAP5     | -0.68 | 3.98E-07 | 2.90E-06 | Under-expressed |
| ZFAND4      | -0.68 | 4.34E-07 | 3.12E-06 | Under-expressed |
| NCK1        | -0.68 | 1.31E-06 | 8.02E-06 | Under-expressed |
| IFIH1       | -0.68 | 2.42E-06 | 1.36E-05 | Under-expressed |
| IDE         | -0.68 | 2.45E-06 | 1.38E-05 | Under-expressed |
| ADAL        | -0.68 | 2.99E-06 | 1.64E-05 | Under-expressed |
| N4BP2L1     | -0.68 | 4.43E-06 | 2.32E-05 | Under-expressed |
| CASC4       | -0.68 | 4.58E-06 | 2.38E-05 | Under-expressed |
| KATNAL1     | -0.68 | 5.20E-06 | 2.65E-05 | Under-expressed |



|              |       |          |          |                 |
|--------------|-------|----------|----------|-----------------|
| RASGRP3      | -0.68 | 6.72E-06 | 3.32E-05 | Under-expressed |
| TAL1         | -0.68 | 9.86E-06 | 4.64E-05 | Under-expressed |
| MAML3        | -0.68 | 1.04E-05 | 4.84E-05 | Under-expressed |
| LRIG1        | -0.68 | 1.18E-05 | 5.43E-05 | Under-expressed |
| MYO5A        | -0.68 | 1.44E-05 | 6.42E-05 | Under-expressed |
| RHOJ         | -0.68 | 2.65E-05 | 1.10E-04 | Under-expressed |
| GPRASP2      | -0.68 | 2.66E-05 | 1.11E-04 | Under-expressed |
| HEATR3       | -0.68 | 3.02E-05 | 1.23E-04 | Under-expressed |
| SSX2IP       | -0.68 | 4.52E-05 | 1.75E-04 | Under-expressed |
| DHRS1        | -0.68 | 6.39E-05 | 2.36E-04 | Under-expressed |
| ADCY4        | -0.68 | 8.56E-05 | 3.06E-04 | Under-expressed |
| HSPG2        | -0.68 | 1.04E-04 | 3.63E-04 | Under-expressed |
| ENPP4        | -0.68 | 1.05E-04 | 3.65E-04 | Under-expressed |
| EBF1         | -0.68 | 1.42E-04 | 4.76E-04 | Under-expressed |
| DCK          | -0.68 | 3.64E-04 | 1.08E-03 | Under-expressed |
| LIMS2        | -0.68 | 6.06E-04 | 1.68E-03 | Under-expressed |
| ANKRD44      | -0.68 | 8.10E-04 | 2.17E-03 | Under-expressed |
| MSMO1        | -0.68 | 1.19E-03 | 3.02E-03 | Under-expressed |
| AKT3         | -0.68 | 1.74E-03 | 4.22E-03 | Under-expressed |
| GBP1         | -0.68 | 1.79E-03 | 4.32E-03 | Under-expressed |
| LOC100130872 | -0.68 | 3.50E-03 | 7.79E-03 | Under-expressed |
| ANG          | -0.68 | 0.0137   | 0.0257   | Under-expressed |
| CTAGE9       | -0.68 | 0.0281   | 0.0485   | Under-expressed |
| XRN1         | -0.69 | 1.28E-10 | 3.04E-09 | Under-expressed |
| RHBDD1       | -0.69 | 3.21E-10 | 6.56E-09 | Under-expressed |
| SDHD         | -0.69 | 6.45E-10 | 1.18E-08 | Under-expressed |
| ZBTB7B       | -0.69 | 4.98E-09 | 6.76E-08 | Under-expressed |
| RAP2C        | -0.69 | 5.51E-09 | 7.39E-08 | Under-expressed |
| ZFYVE9       | -0.69 | 7.67E-09 | 9.81E-08 | Under-expressed |
| AK3          | -0.69 | 8.38E-09 | 1.05E-07 | Under-expressed |
| IVD          | -0.69 | 1.02E-08 | 1.25E-07 | Under-expressed |
| SLC10A7      | -0.69 | 7.88E-08 | 7.27E-07 | Under-expressed |
| ZBTB21       | -0.69 | 1.55E-07 | 1.31E-06 | Under-expressed |
| SDE2         | -0.69 | 3.84E-07 | 2.81E-06 | Under-expressed |
| NT5DC1       | -0.69 | 4.72E-07 | 3.35E-06 | Under-expressed |
| GTF2IRD2P1   | -0.69 | 5.62E-07 | 3.90E-06 | Under-expressed |
| ATRN         | -0.69 | 6.18E-07 | 4.24E-06 | Under-expressed |
| NFE2L2       | -0.69 | 6.49E-07 | 4.43E-06 | Under-expressed |
| TMEM131L     | -0.69 | 1.24E-06 | 7.64E-06 | Under-expressed |
| TRIL         | -0.69 | 2.23E-06 | 1.26E-05 | Under-expressed |
| SLC25A43     | -0.69 | 7.81E-06 | 3.78E-05 | Under-expressed |
| C1ORF74      | -0.69 | 8.72E-06 | 4.17E-05 | Under-expressed |
| UBXN7        | -0.69 | 1.80E-05 | 7.82E-05 | Under-expressed |
| RHOB         | -0.69 | 2.85E-05 | 1.17E-04 | Under-expressed |
| JMJD1C       | -0.69 | 4.35E-05 | 1.69E-04 | Under-expressed |
| NFIB         | -0.69 | 1.06E-04 | 3.70E-04 | Under-expressed |
| PDZD8        | -0.69 | 3.42E-04 | 1.03E-03 | Under-expressed |
| CRYL1        | -0.69 | 4.33E-04 | 1.26E-03 | Under-expressed |
| SYNM         | -0.69 | 8.54E-04 | 2.27E-03 | Under-expressed |
| CEACAM1      | -0.69 | 9.97E-04 | 2.59E-03 | Under-expressed |
| CAV2         | -0.69 | 0.0111   | 0.0214   | Under-expressed |
| MOSMO        | -0.7  | 5.94E-10 | 1.10E-08 | Under-expressed |
| TTPAL        | -0.7  | 1.13E-09 | 1.90E-08 | Under-expressed |
| SEC24A       | -0.7  | 2.89E-09 | 4.24E-08 | Under-expressed |
| DCAF11       | -0.7  | 7.75E-09 | 9.86E-08 | Under-expressed |
| AGO4         | -0.7  | 1.14E-08 | 1.38E-07 | Under-expressed |
| LAMP2        | -0.7  | 1.99E-08 | 2.23E-07 | Under-expressed |

|          |       |          |          |                 |
|----------|-------|----------|----------|-----------------|
| ACO1     | -0.7  | 3.69E-08 | 3.82E-07 | Under-expressed |
| ANO6     | -0.7  | 4.16E-08 | 4.21E-07 | Under-expressed |
| TRAF6    | -0.7  | 5.93E-08 | 5.68E-07 | Under-expressed |
| MLYCD    | -0.7  | 1.81E-07 | 1.49E-06 | Under-expressed |
| ARSD     | -0.7  | 5.04E-07 | 3.55E-06 | Under-expressed |
| TBC1D2   | -0.7  | 9.71E-07 | 6.22E-06 | Under-expressed |
| KIAA2026 | -0.7  | 3.09E-06 | 1.68E-05 | Under-expressed |
| ENTPD4   | -0.7  | 3.78E-06 | 2.01E-05 | Under-expressed |
| DYNLT3   | -0.7  | 5.40E-06 | 2.74E-05 | Under-expressed |
| DDAH1    | -0.7  | 7.21E-06 | 3.53E-05 | Under-expressed |
| LRRC40   | -0.7  | 8.03E-06 | 3.87E-05 | Under-expressed |
| ZXDB     | -0.7  | 2.25E-05 | 9.51E-05 | Under-expressed |
| SLC39A14 | -0.7  | 3.15E-05 | 1.28E-04 | Under-expressed |
| PTPN3    | -0.7  | 5.83E-05 | 2.19E-04 | Under-expressed |
| SAMD4B   | -0.7  | 5.89E-05 | 2.20E-04 | Under-expressed |
| PODXL    | -0.7  | 1.20E-04 | 4.11E-04 | Under-expressed |
| CDK14    | -0.7  | 1.26E-04 | 4.30E-04 | Under-expressed |
| MR1      | -0.7  | 1.34E-04 | 4.53E-04 | Under-expressed |
| LONRF3   | -0.7  | 3.23E-04 | 9.75E-04 | Under-expressed |
| CPE      | -0.7  | 7.21E-04 | 1.96E-03 | Under-expressed |
| SVIL     | -0.7  | 7.41E-04 | 2.01E-03 | Under-expressed |
| XAF1     | -0.7  | 1.03E-03 | 2.67E-03 | Under-expressed |
| LYVE1    | -0.7  | 1.60E-03 | 3.91E-03 | Under-expressed |
| MBOAT1   | -0.7  | 1.85E-03 | 4.43E-03 | Under-expressed |
| GLT8D2   | -0.7  | 2.27E-03 | 5.33E-03 | Under-expressed |
| CYP2J2   | -0.7  | 0.0157   | 0.029    | Under-expressed |
| GEM      | -0.7  | 0.022    | 0.0391   | Under-expressed |
| TPMT     | -0.71 | 1.74E-10 | 3.88E-09 | Under-expressed |
| RAB43    | -0.71 | 2.12E-10 | 4.58E-09 | Under-expressed |
| MAN2B2   | -0.71 | 2.65E-10 | 5.60E-09 | Under-expressed |
| TAB2     | -0.71 | 6.64E-10 | 1.20E-08 | Under-expressed |
| HADH     | -0.71 | 6.71E-08 | 6.32E-07 | Under-expressed |
| SNX19    | -0.71 | 1.27E-07 | 1.10E-06 | Under-expressed |
| ATXN1L   | -0.71 | 3.45E-07 | 2.57E-06 | Under-expressed |
| SLC25A46 | -0.71 | 4.81E-07 | 3.41E-06 | Under-expressed |
| HMBOX1   | -0.71 | 5.39E-07 | 3.76E-06 | Under-expressed |
| DPY19L1  | -0.71 | 6.28E-07 | 4.30E-06 | Under-expressed |
| CCDC15   | -0.71 | 1.90E-06 | 1.10E-05 | Under-expressed |
| MIGA1    | -0.71 | 2.51E-06 | 1.40E-05 | Under-expressed |
| TTC8     | -0.71 | 2.67E-06 | 1.48E-05 | Under-expressed |
| CDH13    | -0.71 | 3.37E-06 | 1.82E-05 | Under-expressed |
| ZNF367   | -0.71 | 1.44E-05 | 6.45E-05 | Under-expressed |
| SLC30A6  | -0.71 | 2.90E-05 | 1.19E-04 | Under-expressed |
| NLRP1    | -0.71 | 4.82E-05 | 1.85E-04 | Under-expressed |
| LPIN1    | -0.71 | 6.81E-05 | 2.50E-04 | Under-expressed |
| RBBP4    | -0.71 | 1.73E-04 | 5.67E-04 | Under-expressed |
| ZNF236   | -0.71 | 2.21E-04 | 7.00E-04 | Under-expressed |
| SP4      | -0.71 | 2.87E-04 | 8.79E-04 | Under-expressed |
| KIAA1107 | -0.71 | 3.05E-04 | 9.30E-04 | Under-expressed |
| ZBTB26   | -0.71 | 1.53E-03 | 3.76E-03 | Under-expressed |
| NBPF15   | -0.71 | 4.00E-03 | 8.74E-03 | Under-expressed |
| NR1H4    | -0.71 | 9.12E-03 | 0.018    | Under-expressed |
| AGTR1    | -0.71 | 0.0253   | 0.0442   | Under-expressed |
| RANBP10  | -0.72 | 1.09E-13 | 7.13E-12 | Under-expressed |
| TAPT1    | -0.72 | 5.25E-12 | 1.95E-10 | Under-expressed |
| FLT1     | -0.72 | 7.05E-10 | 1.27E-08 | Under-expressed |
| HECTD1   | -0.72 | 1.83E-09 | 2.84E-08 | Under-expressed |

|           |       |          |          |                 |
|-----------|-------|----------|----------|-----------------|
| PNPLA8    | -0.72 | 3.88E-08 | 3.99E-07 | Under-expressed |
| C9ORF64   | -0.72 | 5.39E-08 | 5.26E-07 | Under-expressed |
| ZEB1      | -0.72 | 7.24E-08 | 6.75E-07 | Under-expressed |
| CHAMP1    | -0.72 | 1.45E-07 | 1.24E-06 | Under-expressed |
| ZNF41     | -0.72 | 2.43E-07 | 1.89E-06 | Under-expressed |
| TIFA      | -0.72 | 1.27E-06 | 7.80E-06 | Under-expressed |
| DUSP19    | -0.72 | 3.58E-06 | 1.92E-05 | Under-expressed |
| GCLM      | -0.72 | 6.56E-06 | 3.25E-05 | Under-expressed |
| ZFAND5    | -0.72 | 7.04E-06 | 3.45E-05 | Under-expressed |
| GPATCH2L  | -0.72 | 1.02E-05 | 4.77E-05 | Under-expressed |
| NEK4      | -0.72 | 1.33E-05 | 6.00E-05 | Under-expressed |
| CNTLN     | -0.72 | 1.49E-05 | 6.60E-05 | Under-expressed |
| ZNRF2P1   | -0.72 | 4.40E-05 | 1.71E-04 | Under-expressed |
| SLC5A3    | -0.72 | 7.48E-05 | 2.71E-04 | Under-expressed |
| BHLHB9    | -0.72 | 1.35E-04 | 4.56E-04 | Under-expressed |
| PEX11G    | -0.72 | 2.62E-04 | 8.13E-04 | Under-expressed |
| IKZF2     | -0.72 | 5.63E-04 | 1.58E-03 | Under-expressed |
| PARM1     | -0.72 | 5.71E-04 | 1.60E-03 | Under-expressed |
| EHD3      | -0.72 | 8.38E-04 | 2.24E-03 | Under-expressed |
| SHROOM3   | -0.72 | 1.01E-03 | 2.62E-03 | Under-expressed |
| CHSY3     | -0.72 | 1.42E-03 | 3.52E-03 | Under-expressed |
| GBP3      | -0.72 | 2.29E-03 | 5.37E-03 | Under-expressed |
| KCNAB2    | -0.72 | 3.05E-03 | 6.92E-03 | Under-expressed |
| DLL1      | -0.72 | 7.23E-03 | 0.0147   | Under-expressed |
| CYP27A1   | -0.72 | 9.62E-03 | 0.0189   | Under-expressed |
| CDH11     | -0.72 | 0.0184   | 0.0333   | Under-expressed |
| DEPDC5    | -0.73 | 8.11E-13 | 3.90E-11 | Under-expressed |
| USP38     | -0.73 | 1.82E-10 | 4.04E-09 | Under-expressed |
| RIC1      | -0.73 | 1.35E-09 | 2.20E-08 | Under-expressed |
| ARHGEF12  | -0.73 | 1.94E-08 | 2.18E-07 | Under-expressed |
| PIK3C2A   | -0.73 | 3.18E-08 | 3.35E-07 | Under-expressed |
| ARHGAP21  | -0.73 | 4.28E-08 | 4.31E-07 | Under-expressed |
| LACC1     | -0.73 | 9.00E-08 | 8.18E-07 | Under-expressed |
| CBR4      | -0.73 | 1.46E-07 | 1.25E-06 | Under-expressed |
| SIK2      | -0.73 | 1.72E-07 | 1.43E-06 | Under-expressed |
| CMTR2     | -0.73 | 2.04E-07 | 1.65E-06 | Under-expressed |
| ERLIN2    | -0.73 | 2.06E-07 | 1.66E-06 | Under-expressed |
| ASH1L     | -0.73 | 3.64E-07 | 2.68E-06 | Under-expressed |
| RETSAT    | -0.73 | 5.10E-07 | 3.59E-06 | Under-expressed |
| ROBO4     | -0.73 | 7.64E-07 | 5.07E-06 | Under-expressed |
| ARFGEF2   | -0.73 | 1.12E-06 | 7.05E-06 | Under-expressed |
| OTUD4     | -0.73 | 2.02E-06 | 1.16E-05 | Under-expressed |
| MYCT1     | -0.73 | 3.25E-06 | 1.75E-05 | Under-expressed |
| LINC00667 | -0.73 | 5.35E-06 | 2.72E-05 | Under-expressed |
| CDC42EP3  | -0.73 | 1.87E-05 | 8.09E-05 | Under-expressed |
| DNASE1L1  | -0.73 | 3.49E-05 | 1.40E-04 | Under-expressed |
| FAM122C   | -0.73 | 5.21E-05 | 1.98E-04 | Under-expressed |
| PAPSS2    | -0.73 | 7.99E-05 | 2.88E-04 | Under-expressed |
| ITPR2     | -0.73 | 8.14E-05 | 2.93E-04 | Under-expressed |
| TACC1     | -0.73 | 2.26E-04 | 7.15E-04 | Under-expressed |
| ERRFI1    | -0.73 | 3.75E-04 | 1.11E-03 | Under-expressed |
| ADRA2B    | -0.73 | 4.12E-04 | 1.20E-03 | Under-expressed |
| SIRT1     | -0.73 | 5.27E-04 | 1.49E-03 | Under-expressed |
| C3        | -0.73 | 3.61E-03 | 7.99E-03 | Under-expressed |
| WDR7      | -0.74 | 1.64E-13 | 1.02E-11 | Under-expressed |
| CALD1     | -0.74 | 3.19E-13 | 1.76E-11 | Under-expressed |
| C12ORF66  | -0.74 | 2.89E-12 | 1.16E-10 | Under-expressed |

|          |       |          |          |                 |
|----------|-------|----------|----------|-----------------|
| SEC24B   | -0.74 | 4.94E-10 | 9.48E-09 | Under-expressed |
| NEK1     | -0.74 | 5.47E-10 | 1.03E-08 | Under-expressed |
| SPRY3    | -0.74 | 5.79E-10 | 1.08E-08 | Under-expressed |
| CLIC4    | -0.74 | 1.03E-09 | 1.76E-08 | Under-expressed |
| ACAP2    | -0.74 | 3.57E-09 | 5.10E-08 | Under-expressed |
| KMT2C    | -0.74 | 3.99E-09 | 5.60E-08 | Under-expressed |
| ZNF441   | -0.74 | 1.43E-08 | 1.68E-07 | Under-expressed |
| ZNF275   | -0.74 | 8.04E-08 | 7.40E-07 | Under-expressed |
| TIMP3    | -0.74 | 1.93E-07 | 1.57E-06 | Under-expressed |
| EP300    | -0.74 | 6.76E-07 | 4.58E-06 | Under-expressed |
| PLCG2    | -0.74 | 1.69E-06 | 1.00E-05 | Under-expressed |
| ALDH7A1  | -0.74 | 4.91E-06 | 2.53E-05 | Under-expressed |
| ADAMTS4  | -0.74 | 6.43E-06 | 3.20E-05 | Under-expressed |
| SPRY1    | -0.74 | 6.77E-06 | 3.34E-05 | Under-expressed |
| KCTD18   | -0.74 | 7.09E-06 | 3.48E-05 | Under-expressed |
| PECR     | -0.74 | 2.48E-05 | 1.04E-04 | Under-expressed |
| ARHGAP23 | -0.74 | 2.67E-05 | 1.11E-04 | Under-expressed |
| GNAI1    | -0.74 | 3.84E-05 | 1.52E-04 | Under-expressed |
| TM4SF18  | -0.74 | 4.03E-05 | 1.58E-04 | Under-expressed |
| METTL7A  | -0.74 | 4.36E-05 | 1.70E-04 | Under-expressed |
| ATP10D   | -0.74 | 4.97E-05 | 1.90E-04 | Under-expressed |
| RBPMS2   | -0.74 | 1.67E-03 | 4.06E-03 | Under-expressed |
| CXXC5    | -0.74 | 1.79E-03 | 4.32E-03 | Under-expressed |
| NEXN     | -0.74 | 3.57E-03 | 7.91E-03 | Under-expressed |
| SNAI2    | -0.74 | 6.97E-03 | 0.0142   | Under-expressed |
| FGF13    | -0.74 | 9.65E-03 | 0.0189   | Under-expressed |
| CTBS     | -0.75 | 1.43E-10 | 3.33E-09 | Under-expressed |
| PARP9    | -0.75 | 1.16E-09 | 1.94E-08 | Under-expressed |
| CELF1    | -0.75 | 3.29E-09 | 4.74E-08 | Under-expressed |
| CCDC126  | -0.75 | 8.74E-09 | 1.09E-07 | Under-expressed |
| SOS2     | -0.75 | 1.11E-08 | 1.35E-07 | Under-expressed |
| ACBD5    | -0.75 | 3.03E-08 | 3.22E-07 | Under-expressed |
| CPT1A    | -0.75 | 4.10E-08 | 4.17E-07 | Under-expressed |
| ACOX1    | -0.75 | 4.60E-08 | 4.56E-07 | Under-expressed |
| ZBTB38   | -0.75 | 6.39E-07 | 4.37E-06 | Under-expressed |
| ARHGAP31 | -0.75 | 7.17E-07 | 4.81E-06 | Under-expressed |
| ITPRID2  | -0.75 | 1.61E-06 | 9.59E-06 | Under-expressed |
| GPHN     | -0.75 | 1.88E-06 | 1.10E-05 | Under-expressed |
| DNAH1    | -0.75 | 4.14E-06 | 2.18E-05 | Under-expressed |
| JAK2     | -0.75 | 4.75E-06 | 2.45E-05 | Under-expressed |
| ARHGAP29 | -0.75 | 5.96E-06 | 2.99E-05 | Under-expressed |
| OAS3     | -0.75 | 9.07E-06 | 4.32E-05 | Under-expressed |
| HEG1     | -0.75 | 1.20E-05 | 5.49E-05 | Under-expressed |
| CRPPA    | -0.75 | 1.86E-05 | 8.03E-05 | Under-expressed |
| LHFPL6   | -0.75 | 2.94E-05 | 1.20E-04 | Under-expressed |
| CMPK2    | -0.75 | 9.50E-05 | 3.35E-04 | Under-expressed |
| PNPLA7   | -0.75 | 2.76E-04 | 8.50E-04 | Under-expressed |
| SYTL2    | -0.75 | 3.04E-04 | 9.26E-04 | Under-expressed |
| ENPP1    | -0.75 | 3.22E-04 | 9.73E-04 | Under-expressed |
| IFT81    | -0.75 | 7.37E-04 | 2.00E-03 | Under-expressed |
| TLR1     | -0.75 | 7.69E-04 | 2.07E-03 | Under-expressed |
| ACKR3    | -0.75 | 8.88E-04 | 2.35E-03 | Under-expressed |
| PTGR1    | -0.75 | 8.65E-03 | 0.0172   | Under-expressed |
| ELOVL2   | -0.75 | 9.56E-03 | 0.0188   | Under-expressed |
| FYCO1    | -0.76 | 7.73E-12 | 2.72E-10 | Under-expressed |
| PIK3R4   | -0.76 | 6.47E-11 | 1.70E-09 | Under-expressed |
| FBXL5    | -0.76 | 1.12E-10 | 2.70E-09 | Under-expressed |

|           |       |          |          |                 |
|-----------|-------|----------|----------|-----------------|
| TMEM184C  | -0.76 | 6.16E-10 | 1.13E-08 | Under-expressed |
| TOR1AIP1  | -0.76 | 5.36E-09 | 7.24E-08 | Under-expressed |
| GOLGA4    | -0.76 | 6.15E-09 | 8.11E-08 | Under-expressed |
| ZBTB18    | -0.76 | 1.77E-08 | 2.02E-07 | Under-expressed |
| ZCCHC2    | -0.76 | 4.58E-08 | 4.55E-07 | Under-expressed |
| SH3BP4    | -0.76 | 1.38E-07 | 1.19E-06 | Under-expressed |
| CRY1      | -0.76 | 1.90E-07 | 1.55E-06 | Under-expressed |
| ZBTB43    | -0.76 | 2.20E-07 | 1.75E-06 | Under-expressed |
| ARRDC3    | -0.76 | 3.29E-06 | 1.77E-05 | Under-expressed |
| RGP1      | -0.76 | 6.32E-06 | 3.15E-05 | Under-expressed |
| BDNF-AS   | -0.76 | 1.13E-05 | 5.22E-05 | Under-expressed |
| NEK7      | -0.76 | 1.37E-05 | 6.16E-05 | Under-expressed |
| SEPTIN10  | -0.76 | 1.63E-05 | 7.18E-05 | Under-expressed |
| SLC25A42  | -0.76 | 2.54E-04 | 7.90E-04 | Under-expressed |
| GAS6      | -0.76 | 4.78E-04 | 1.37E-03 | Under-expressed |
| NPIPB5    | -0.76 | 7.41E-04 | 2.01E-03 | Under-expressed |
| AQP11     | -0.76 | 8.57E-04 | 2.28E-03 | Under-expressed |
| CD109     | -0.76 | 2.00E-03 | 4.75E-03 | Under-expressed |
| AMACR     | -0.76 | 2.68E-03 | 6.18E-03 | Under-expressed |
| AGMAT     | -0.76 | 3.66E-03 | 8.08E-03 | Under-expressed |
| APLNR     | -0.76 | 5.44E-03 | 0.0114   | Under-expressed |
| AKR7L     | -0.76 | 8.64E-03 | 0.0172   | Under-expressed |
| SYT7      | -0.76 | 9.37E-03 | 0.0184   | Under-expressed |
| REEP6     | -0.76 | 0.0127   | 0.0241   | Under-expressed |
| SLC25A18  | -0.76 | 0.0233   | 0.0411   | Under-expressed |
| AP5M1     | -0.77 | 5.50E-14 | 3.88E-12 | Under-expressed |
| TANGO6    | -0.77 | 2.12E-10 | 4.58E-09 | Under-expressed |
| LYSMD3    | -0.77 | 1.51E-09 | 2.42E-08 | Under-expressed |
| SYNJ1     | -0.77 | 3.46E-09 | 4.96E-08 | Under-expressed |
| NRIP1     | -0.77 | 1.10E-08 | 1.34E-07 | Under-expressed |
| FNDC3A    | -0.77 | 2.66E-08 | 2.88E-07 | Under-expressed |
| TECPR1    | -0.77 | 4.29E-07 | 3.09E-06 | Under-expressed |
| CHAC2     | -0.77 | 5.56E-07 | 3.87E-06 | Under-expressed |
| KIDINS220 | -0.77 | 1.13E-06 | 7.10E-06 | Under-expressed |
| PRIMPOL   | -0.77 | 1.37E-06 | 8.30E-06 | Under-expressed |
| MBP       | -0.77 | 1.69E-06 | 1.00E-05 | Under-expressed |
| DDX60L    | -0.77 | 2.08E-06 | 1.19E-05 | Under-expressed |
| ATP8B4    | -0.77 | 5.40E-06 | 2.74E-05 | Under-expressed |
| USP53     | -0.77 | 6.09E-06 | 3.04E-05 | Under-expressed |
| ELF1      | -0.77 | 1.12E-05 | 5.21E-05 | Under-expressed |
| TAF1      | -0.77 | 1.77E-05 | 7.69E-05 | Under-expressed |
| PID1      | -0.77 | 5.67E-05 | 2.13E-04 | Under-expressed |
| F2R       | -0.77 | 2.26E-04 | 7.14E-04 | Under-expressed |
| RASA1     | -0.77 | 2.64E-04 | 8.16E-04 | Under-expressed |
| SHISA4    | -0.77 | 6.27E-04 | 1.73E-03 | Under-expressed |
| NID2      | -0.77 | 6.60E-04 | 1.82E-03 | Under-expressed |
| FAM221A   | -0.77 | 2.18E-03 | 5.16E-03 | Under-expressed |
| KHK       | -0.77 | 4.91E-03 | 0.0105   | Under-expressed |
| DISP2     | -0.77 | 5.81E-03 | 0.0121   | Under-expressed |
| DCXR      | -0.77 | 5.97E-03 | 0.0124   | Under-expressed |
| PRMT9     | -0.78 | 3.80E-10 | 7.58E-09 | Under-expressed |
| SEL1L     | -0.78 | 5.39E-10 | 1.02E-08 | Under-expressed |
| HIBADH    | -0.78 | 1.11E-09 | 1.87E-08 | Under-expressed |
| MYCBP2    | -0.78 | 4.27E-09 | 5.93E-08 | Under-expressed |
| CRY2      | -0.78 | 5.23E-09 | 7.08E-08 | Under-expressed |
| LRCH1     | -0.78 | 5.76E-09 | 7.66E-08 | Under-expressed |
| MAGI1     | -0.78 | 1.44E-08 | 1.68E-07 | Under-expressed |

|              |       |          |          |                 |
|--------------|-------|----------|----------|-----------------|
| KLHL15       | -0.78 | 1.61E-08 | 1.86E-07 | Under-expressed |
| DHFR2        | -0.78 | 3.45E-08 | 3.59E-07 | Under-expressed |
| RCBTB1       | -0.78 | 3.47E-08 | 3.61E-07 | Under-expressed |
| NBPF1        | -0.78 | 5.53E-08 | 5.36E-07 | Under-expressed |
| TRIM44       | -0.78 | 6.02E-08 | 5.76E-07 | Under-expressed |
| MBIP         | -0.78 | 1.82E-07 | 1.50E-06 | Under-expressed |
| H6PD         | -0.78 | 1.87E-07 | 1.53E-06 | Under-expressed |
| ACAA2        | -0.78 | 3.49E-07 | 2.60E-06 | Under-expressed |
| PIKFYVE      | -0.78 | 7.63E-07 | 5.07E-06 | Under-expressed |
| KALRN        | -0.78 | 1.66E-06 | 9.84E-06 | Under-expressed |
| LMLN         | -0.78 | 2.69E-06 | 1.49E-05 | Under-expressed |
| GTF2H3       | -0.78 | 2.93E-06 | 1.60E-05 | Under-expressed |
| SLC25A30     | -0.78 | 5.20E-06 | 2.65E-05 | Under-expressed |
| THRB         | -0.78 | 6.27E-06 | 3.13E-05 | Under-expressed |
| SGMS2        | -0.78 | 2.43E-05 | 1.02E-04 | Under-expressed |
| TRIO         | -0.78 | 3.04E-05 | 1.23E-04 | Under-expressed |
| STEAP3       | -0.78 | 5.68E-05 | 2.14E-04 | Under-expressed |
| DIPK2A       | -0.78 | 8.92E-05 | 3.17E-04 | Under-expressed |
| SGK1         | -0.78 | 9.99E-05 | 3.50E-04 | Under-expressed |
| PLEKHA7      | -0.78 | 1.39E-04 | 4.66E-04 | Under-expressed |
| SMO          | -0.78 | 4.62E-04 | 1.33E-03 | Under-expressed |
| FAM20A       | -0.78 | 4.98E-04 | 1.42E-03 | Under-expressed |
| IFI44        | -0.78 | 5.80E-04 | 1.62E-03 | Under-expressed |
| DIP2C        | -0.78 | 1.16E-03 | 2.95E-03 | Under-expressed |
| FADS2        | -0.78 | 9.75E-03 | 0.0191   | Under-expressed |
| EPAS1        | -0.79 | 5.80E-12 | 2.12E-10 | Under-expressed |
| HERC1        | -0.79 | 1.43E-11 | 4.64E-10 | Under-expressed |
| VAMP7        | -0.79 | 1.45E-10 | 3.36E-09 | Under-expressed |
| SH3D19       | -0.79 | 2.38E-09 | 3.59E-08 | Under-expressed |
| IMPACT       | -0.79 | 2.48E-09 | 3.71E-08 | Under-expressed |
| CHD9         | -0.79 | 6.28E-09 | 8.24E-08 | Under-expressed |
| ANKRD50      | -0.79 | 7.00E-08 | 6.57E-07 | Under-expressed |
| CITED2       | -0.79 | 2.32E-07 | 1.82E-06 | Under-expressed |
| TM9SF2       | -0.79 | 3.10E-07 | 2.35E-06 | Under-expressed |
| SMAD1        | -0.79 | 6.50E-07 | 4.44E-06 | Under-expressed |
| ARHGAP32     | -0.79 | 6.92E-07 | 4.67E-06 | Under-expressed |
| NFIX         | -0.79 | 7.48E-07 | 4.98E-06 | Under-expressed |
| MOSPD2       | -0.79 | 7.52E-07 | 5.00E-06 | Under-expressed |
| CAPN5        | -0.79 | 7.83E-07 | 5.18E-06 | Under-expressed |
| SMG1P3       | -0.79 | 2.76E-05 | 1.14E-04 | Under-expressed |
| NID1         | -0.79 | 5.71E-05 | 2.15E-04 | Under-expressed |
| C4ORF19      | -0.79 | 1.16E-04 | 4.01E-04 | Under-expressed |
| MGLL         | -0.79 | 1.46E-04 | 4.87E-04 | Under-expressed |
| APOL3        | -0.79 | 2.11E-04 | 6.72E-04 | Under-expressed |
| RIDA         | -0.79 | 2.22E-04 | 7.03E-04 | Under-expressed |
| RGPD3        | -0.79 | 2.79E-04 | 8.57E-04 | Under-expressed |
| TMTC1        | -0.79 | 9.16E-04 | 2.41E-03 | Under-expressed |
| ITM2A        | -0.79 | 1.58E-03 | 3.87E-03 | Under-expressed |
| SOCS2        | -0.79 | 2.30E-03 | 5.39E-03 | Under-expressed |
| CCL14        | -0.79 | 2.65E-03 | 6.12E-03 | Under-expressed |
| WLS          | -0.79 | 4.15E-03 | 9.03E-03 | Under-expressed |
| NUDT12       | -0.79 | 4.35E-03 | 9.43E-03 | Under-expressed |
| ITIH2        | -0.79 | 0.013    | 0.0245   | Under-expressed |
| PLIN1        | -0.79 | 0.0177   | 0.0322   | Under-expressed |
| LIG4         | -0.8  | 2.44E-09 | 3.67E-08 | Under-expressed |
| SAV1         | -0.8  | 4.12E-09 | 5.75E-08 | Under-expressed |
| LOC100130093 | -0.8  | 4.90E-07 | 3.47E-06 | Under-expressed |

|          |       |          |          |                 |
|----------|-------|----------|----------|-----------------|
| RCAN1    | -0.8  | 5.36E-07 | 3.74E-06 | Under-expressed |
| CLMN     | -0.8  | 7.41E-07 | 4.95E-06 | Under-expressed |
| GPR146   | -0.8  | 2.27E-06 | 1.28E-05 | Under-expressed |
| PRRG1    | -0.8  | 3.23E-06 | 1.75E-05 | Under-expressed |
| POGLUT3  | -0.8  | 5.40E-06 | 2.74E-05 | Under-expressed |
| WWC2     | -0.8  | 1.21E-05 | 5.55E-05 | Under-expressed |
| LRRCC1   | -0.8  | 1.33E-04 | 4.50E-04 | Under-expressed |
| KITLG    | -0.8  | 1.34E-04 | 4.53E-04 | Under-expressed |
| SYNJ2    | -0.8  | 3.33E-04 | 1.00E-03 | Under-expressed |
| HAAO     | -0.8  | 3.63E-04 | 1.08E-03 | Under-expressed |
| STAG3L1  | -0.8  | 4.53E-04 | 1.31E-03 | Under-expressed |
| RTN4RL2  | -0.8  | 1.10E-03 | 2.82E-03 | Under-expressed |
| MOB3B    | -0.8  | 1.81E-03 | 4.37E-03 | Under-expressed |
| NR4A2    | -0.8  | 1.83E-03 | 4.40E-03 | Under-expressed |
| TMEM25   | -0.8  | 2.81E-03 | 6.45E-03 | Under-expressed |
| ATF5     | -0.8  | 0.0103   | 0.0201   | Under-expressed |
| MXRA5    | -0.8  | 0.015    | 0.0278   | Under-expressed |
| ABCB1    | -0.8  | 0.0152   | 0.0282   | Under-expressed |
| ATOH8    | -0.8  | 0.0229   | 0.0404   | Under-expressed |
| CCPG1    | -0.81 | 1.98E-10 | 4.31E-09 | Under-expressed |
| MIA3     | -0.81 | 6.25E-10 | 1.14E-08 | Under-expressed |
| EMSY     | -0.81 | 6.51E-10 | 1.18E-08 | Under-expressed |
| NDRG2    | -0.81 | 1.13E-08 | 1.36E-07 | Under-expressed |
| KLHL2    | -0.81 | 2.79E-08 | 2.99E-07 | Under-expressed |
| PLEKHM3  | -0.81 | 2.83E-08 | 3.02E-07 | Under-expressed |
| APOL6    | -0.81 | 1.66E-07 | 1.39E-06 | Under-expressed |
| MPHOSPH9 | -0.81 | 1.76E-07 | 1.46E-06 | Under-expressed |
| MORC3    | -0.81 | 2.28E-07 | 1.80E-06 | Under-expressed |
| ARL5B    | -0.81 | 2.64E-07 | 2.04E-06 | Under-expressed |
| STARD8   | -0.81 | 3.05E-07 | 2.31E-06 | Under-expressed |
| KLF13    | -0.81 | 3.20E-07 | 2.42E-06 | Under-expressed |
| ALAS1    | -0.81 | 3.56E-07 | 2.64E-06 | Under-expressed |
| GLCC1    | -0.81 | 4.52E-06 | 2.35E-05 | Under-expressed |
| SIAE     | -0.81 | 8.69E-06 | 4.16E-05 | Under-expressed |
| CASP8AP2 | -0.81 | 2.10E-05 | 8.97E-05 | Under-expressed |
| FRK      | -0.81 | 2.77E-05 | 1.14E-04 | Under-expressed |
| CD82     | -0.81 | 4.45E-05 | 1.73E-04 | Under-expressed |
| CPNE8    | -0.81 | 8.71E-05 | 3.11E-04 | Under-expressed |
| MDFIC    | -0.81 | 1.75E-04 | 5.72E-04 | Under-expressed |
| 1-Mar    | -0.81 | 2.38E-04 | 7.47E-04 | Under-expressed |
| PLXDC2   | -0.81 | 5.04E-04 | 1.44E-03 | Under-expressed |
| AMY2B    | -0.81 | 5.63E-04 | 1.58E-03 | Under-expressed |
| DOCK10   | -0.81 | 7.87E-04 | 2.12E-03 | Under-expressed |
| MAOB     | -0.81 | 9.89E-04 | 2.58E-03 | Under-expressed |
| TMPRSS2  | -0.81 | 6.26E-03 | 0.0129   | Under-expressed |
| CIPC     | -0.82 | 1.25E-10 | 2.98E-09 | Under-expressed |
| PIK3R3   | -0.82 | 1.52E-10 | 3.50E-09 | Under-expressed |
| DTWD2    | -0.82 | 3.48E-10 | 7.04E-09 | Under-expressed |
| CARF     | -0.82 | 1.93E-07 | 1.56E-06 | Under-expressed |
| SUGT1P3  | -0.82 | 2.72E-07 | 2.09E-06 | Under-expressed |
| LRRC58   | -0.82 | 3.71E-07 | 2.73E-06 | Under-expressed |
| EFNB2    | -0.82 | 9.17E-07 | 5.92E-06 | Under-expressed |
| SLC25A20 | -0.82 | 1.78E-06 | 1.04E-05 | Under-expressed |
| CD302    | -0.82 | 3.18E-06 | 1.72E-05 | Under-expressed |
| SPDYE3   | -0.82 | 4.49E-06 | 2.34E-05 | Under-expressed |
| RIPOR2   | -0.82 | 8.63E-06 | 4.14E-05 | Under-expressed |
| DNAJC22  | -0.82 | 1.50E-05 | 6.67E-05 | Under-expressed |

|           |       |          |          |                 |
|-----------|-------|----------|----------|-----------------|
| KANK1     | -0.82 | 5.85E-05 | 2.19E-04 | Under-expressed |
| FASN      | -0.82 | 8.48E-05 | 3.04E-04 | Under-expressed |
| CELSR2    | -0.82 | 1.31E-04 | 4.44E-04 | Under-expressed |
| LINC00526 | -0.82 | 2.11E-04 | 6.72E-04 | Under-expressed |
| HSPA4L    | -0.82 | 3.62E-04 | 1.08E-03 | Under-expressed |
| CD55      | -0.82 | 5.49E-04 | 1.54E-03 | Under-expressed |
| SRGAP1    | -0.82 | 1.83E-03 | 4.40E-03 | Under-expressed |
| DBT       | -0.83 | 1.28E-13 | 8.18E-12 | Under-expressed |
| SH2B3     | -0.83 | 2.07E-12 | 8.78E-11 | Under-expressed |
| LTN1      | -0.83 | 4.06E-07 | 2.94E-06 | Under-expressed |
| LPIN2     | -0.83 | 6.68E-07 | 4.54E-06 | Under-expressed |
| RPS6KA2   | -0.83 | 1.71E-06 | 1.01E-05 | Under-expressed |
| LPL       | -0.83 | 2.29E-06 | 1.29E-05 | Under-expressed |
| WNT3      | -0.83 | 2.68E-06 | 1.49E-05 | Under-expressed |
| PHYH      | -0.83 | 1.79E-05 | 7.79E-05 | Under-expressed |
| PDPR      | -0.83 | 2.00E-05 | 8.57E-05 | Under-expressed |
| MINDY2    | -0.83 | 2.83E-05 | 1.16E-04 | Under-expressed |
| CAP2      | -0.83 | 3.40E-05 | 1.37E-04 | Under-expressed |
| MRC1      | -0.83 | 2.71E-04 | 8.36E-04 | Under-expressed |
| CD14      | -0.83 | 3.58E-04 | 1.07E-03 | Under-expressed |
| GK3P      | -0.83 | 5.88E-04 | 1.63E-03 | Under-expressed |
| HERC5     | -0.83 | 9.78E-04 | 2.55E-03 | Under-expressed |
| TMEM30B   | -0.83 | 1.97E-03 | 4.69E-03 | Under-expressed |
| SLC16A11  | -0.83 | 0.0159   | 0.0293   | Under-expressed |
| ZYG11B    | -0.84 | 7.63E-14 | 5.20E-12 | Under-expressed |
| RESF1     | -0.84 | 5.15E-11 | 1.43E-09 | Under-expressed |
| FLT4      | -0.84 | 1.03E-08 | 1.25E-07 | Under-expressed |
| UEVLD     | -0.84 | 3.39E-08 | 3.54E-07 | Under-expressed |
| MEF2A     | -0.84 | 4.45E-08 | 4.45E-07 | Under-expressed |
| DYSF      | -0.84 | 8.14E-08 | 7.48E-07 | Under-expressed |
| SLC2A13   | -0.84 | 1.03E-07 | 9.19E-07 | Under-expressed |
| ABCA5     | -0.84 | 1.91E-07 | 1.56E-06 | Under-expressed |
| IRS1      | -0.84 | 2.93E-07 | 2.23E-06 | Under-expressed |
| KLHL28    | -0.84 | 5.53E-07 | 3.85E-06 | Under-expressed |
| TRANK1    | -0.84 | 7.30E-07 | 4.88E-06 | Under-expressed |
| CLUHP3    | -0.84 | 2.88E-06 | 1.58E-05 | Under-expressed |
| CYB5A     | -0.84 | 4.08E-06 | 2.15E-05 | Under-expressed |
| ZFYVE28   | -0.84 | 4.14E-06 | 2.18E-05 | Under-expressed |
| THBD      | -0.84 | 1.05E-05 | 4.91E-05 | Under-expressed |
| RNASEL    | -0.84 | 2.53E-05 | 1.05E-04 | Under-expressed |
| FILIP1L   | -0.84 | 2.88E-05 | 1.18E-04 | Under-expressed |
| CADM1     | -0.84 | 4.23E-05 | 1.65E-04 | Under-expressed |
| NFASC     | -0.84 | 6.61E-05 | 2.43E-04 | Under-expressed |
| PKD2      | -0.84 | 6.97E-05 | 2.55E-04 | Under-expressed |
| GJA5      | -0.84 | 7.66E-05 | 2.77E-04 | Under-expressed |
| GIMAP2    | -0.84 | 1.38E-04 | 4.64E-04 | Under-expressed |
| NTN4      | -0.84 | 2.79E-04 | 8.58E-04 | Under-expressed |
| CA13      | -0.84 | 3.23E-04 | 9.75E-04 | Under-expressed |
| CLEC3B    | -0.84 | 8.77E-04 | 2.33E-03 | Under-expressed |
| GJB2      | -0.84 | 1.06E-03 | 2.73E-03 | Under-expressed |
| SPTBN2    | -0.84 | 1.84E-03 | 4.41E-03 | Under-expressed |
| COL14A1   | -0.84 | 2.49E-03 | 5.78E-03 | Under-expressed |
| HLF       | -0.84 | 4.00E-03 | 8.75E-03 | Under-expressed |
| DEPDC7    | -0.84 | 4.05E-03 | 8.84E-03 | Under-expressed |
| MGST1     | -0.84 | 8.29E-03 | 0.0166   | Under-expressed |
| FMO5      | -0.84 | 9.79E-03 | 0.0192   | Under-expressed |
| OCIAD2    | -0.84 | 0.0106   | 0.0205   | Under-expressed |



|           |       |          |          |                 |
|-----------|-------|----------|----------|-----------------|
| KANK2     | -0.85 | 1.73E-10 | 3.88E-09 | Under-expressed |
| HIPK1     | -0.85 | 2.75E-10 | 5.78E-09 | Under-expressed |
| EXOC3L2   | -0.85 | 1.11E-08 | 1.35E-07 | Under-expressed |
| SHROOM4   | -0.85 | 9.14E-08 | 8.30E-07 | Under-expressed |
| CDC42BPA  | -0.85 | 1.58E-07 | 1.34E-06 | Under-expressed |
| CLCN3     | -0.85 | 1.77E-07 | 1.47E-06 | Under-expressed |
| KIAA1109  | -0.85 | 2.45E-07 | 1.92E-06 | Under-expressed |
| SRD5A1    | -0.85 | 3.72E-07 | 2.73E-06 | Under-expressed |
| TMCC3     | -0.85 | 4.20E-07 | 3.04E-06 | Under-expressed |
| APOLD1    | -0.85 | 4.57E-07 | 3.27E-06 | Under-expressed |
| BTN3A3    | -0.85 | 7.02E-07 | 4.73E-06 | Under-expressed |
| SKIL      | -0.85 | 1.30E-05 | 5.92E-05 | Under-expressed |
| LOC729603 | -0.85 | 4.16E-05 | 1.63E-04 | Under-expressed |
| CRYBG1    | -0.85 | 1.39E-04 | 4.68E-04 | Under-expressed |
| CMAHP     | -0.85 | 4.18E-04 | 1.22E-03 | Under-expressed |
| PLA1A     | -0.85 | 5.50E-04 | 1.54E-03 | Under-expressed |
| AGL       | -0.86 | 1.61E-12 | 7.20E-11 | Under-expressed |
| CPT2      | -0.86 | 3.17E-11 | 9.36E-10 | Under-expressed |
| ELOVL5    | -0.86 | 1.70E-10 | 3.83E-09 | Under-expressed |
| PDPK1     | -0.86 | 1.14E-08 | 1.38E-07 | Under-expressed |
| PIK3CA    | -0.86 | 4.48E-08 | 4.46E-07 | Under-expressed |
| TMEM38B   | -0.86 | 5.73E-08 | 5.50E-07 | Under-expressed |
| SH3BP5    | -0.86 | 2.37E-07 | 1.86E-06 | Under-expressed |
| RSRC1     | -0.86 | 1.74E-05 | 7.59E-05 | Under-expressed |
| DYRK3     | -0.86 | 3.62E-05 | 1.44E-04 | Under-expressed |
| ADAMTS1   | -0.86 | 5.47E-05 | 2.07E-04 | Under-expressed |
| DDX21     | -0.86 | 6.60E-04 | 1.82E-03 | Under-expressed |
| TFPI      | -0.86 | 4.86E-03 | 0.0104   | Under-expressed |
| LAMC3     | -0.86 | 0.0125   | 0.0237   | Under-expressed |
| NIPSNAP3A | -0.87 | 5.30E-10 | 1.01E-08 | Under-expressed |
| HEATR5A   | -0.87 | 7.13E-10 | 1.28E-08 | Under-expressed |
| PEX1      | -0.87 | 8.25E-10 | 1.46E-08 | Under-expressed |
| ITGA1     | -0.87 | 1.00E-09 | 1.72E-08 | Under-expressed |
| ERG       | -0.87 | 8.07E-09 | 1.02E-07 | Under-expressed |
| TLR4      | -0.87 | 1.84E-08 | 2.09E-07 | Under-expressed |
| HP55      | -0.87 | 9.80E-08 | 8.79E-07 | Under-expressed |
| KLF10     | -0.87 | 2.46E-07 | 1.92E-06 | Under-expressed |
| GIMAP6    | -0.87 | 6.19E-07 | 4.24E-06 | Under-expressed |
| CSRP2     | -0.87 | 2.39E-06 | 1.35E-05 | Under-expressed |
| RNFT1     | -0.87 | 4.57E-06 | 2.37E-05 | Under-expressed |
| ANO8      | -0.87 | 1.69E-05 | 7.41E-05 | Under-expressed |
| CACNA1C   | -0.87 | 2.81E-05 | 1.16E-04 | Under-expressed |
| EYA3      | -0.87 | 1.04E-04 | 3.62E-04 | Under-expressed |
| GUCY1A1   | -0.87 | 1.04E-04 | 3.63E-04 | Under-expressed |
| THSD1     | -0.87 | 1.16E-04 | 4.01E-04 | Under-expressed |
| ABI3BP    | -0.87 | 3.69E-04 | 1.10E-03 | Under-expressed |
| SLC16A14  | -0.87 | 5.42E-04 | 1.53E-03 | Under-expressed |
| GMPR      | -0.87 | 1.98E-03 | 4.73E-03 | Under-expressed |
| GC        | -0.87 | 3.27E-03 | 7.34E-03 | Under-expressed |
| OSGIN1    | -0.87 | 5.47E-03 | 0.0115   | Under-expressed |
| ADH6      | -0.87 | 0.0158   | 0.029    | Under-expressed |
| ERCC4     | -0.88 | 1.62E-12 | 7.20E-11 | Under-expressed |
| AOC3      | -0.88 | 2.04E-08 | 2.28E-07 | Under-expressed |
| TXNDC16   | -0.88 | 2.58E-08 | 2.79E-07 | Under-expressed |
| ARHGEF6   | -0.88 | 1.03E-07 | 9.18E-07 | Under-expressed |
| BOD1L1    | -0.88 | 3.65E-07 | 2.69E-06 | Under-expressed |
| SCPEP1    | -0.88 | 4.37E-06 | 2.29E-05 | Under-expressed |

|            |       |          |          |                 |
|------------|-------|----------|----------|-----------------|
| PDZD2      | -0.88 | 1.39E-05 | 6.25E-05 | Under-expressed |
| CHN2       | -0.88 | 5.10E-05 | 1.94E-04 | Under-expressed |
| VWF        | -0.88 | 1.30E-04 | 4.43E-04 | Under-expressed |
| HCFC2      | -0.89 | 1.80E-13 | 1.12E-11 | Under-expressed |
| SEPSECS    | -0.89 | 3.15E-11 | 9.33E-10 | Under-expressed |
| ATP11B     | -0.89 | 4.78E-10 | 9.23E-09 | Under-expressed |
| TRPM7      | -0.89 | 1.11E-09 | 1.88E-08 | Under-expressed |
| LNPEP      | -0.89 | 1.34E-08 | 1.59E-07 | Under-expressed |
| ITGA7      | -0.89 | 2.26E-08 | 2.49E-07 | Under-expressed |
| PAXIP1-AS2 | -0.89 | 2.96E-08 | 3.16E-07 | Under-expressed |
| TIE1       | -0.89 | 5.52E-08 | 5.35E-07 | Under-expressed |
| FAM107A    | -0.89 | 2.35E-06 | 1.33E-05 | Under-expressed |
| PACSIN2    | -0.89 | 3.07E-06 | 1.67E-05 | Under-expressed |
| KDM8       | -0.89 | 6.81E-06 | 3.35E-05 | Under-expressed |
| PMEL       | -0.89 | 1.14E-05 | 5.25E-05 | Under-expressed |
| SEMA3G     | -0.89 | 2.67E-05 | 1.11E-04 | Under-expressed |
| RAMP3      | -0.89 | 4.30E-04 | 1.25E-03 | Under-expressed |
| GPT2       | -0.89 | 5.41E-04 | 1.53E-03 | Under-expressed |
| ADSSL1     | -0.89 | 5.47E-04 | 1.54E-03 | Under-expressed |
| SYBU       | -0.89 | 1.17E-03 | 2.97E-03 | Under-expressed |
| EPHA1      | -0.89 | 4.57E-03 | 9.84E-03 | Under-expressed |
| RGN        | -0.89 | 5.59E-03 | 0.0117   | Under-expressed |
| PCOLCE2    | -0.89 | 9.00E-03 | 0.0178   | Under-expressed |
| PCYOX1     | -0.9  | 4.66E-13 | 2.40E-11 | Under-expressed |
| IPP        | -0.9  | 4.86E-10 | 9.36E-09 | Under-expressed |
| ZC3H13     | -0.9  | 1.07E-09 | 1.82E-08 | Under-expressed |
| ADGRF5     | -0.9  | 1.33E-09 | 2.18E-08 | Under-expressed |
| CYYR1      | -0.9  | 9.39E-08 | 8.48E-07 | Under-expressed |
| SYNE2      | -0.9  | 1.90E-07 | 1.55E-06 | Under-expressed |
| MAGI2      | -0.9  | 6.68E-07 | 4.54E-06 | Under-expressed |
| NAP1L5     | -0.9  | 6.82E-07 | 4.62E-06 | Under-expressed |
| RAB30      | -0.9  | 7.07E-07 | 4.76E-06 | Under-expressed |
| CCDC146    | -0.9  | 7.16E-07 | 4.81E-06 | Under-expressed |
| CYP4V2     | -0.9  | 1.05E-06 | 6.65E-06 | Under-expressed |
| VPS35L     | -0.9  | 1.65E-06 | 9.77E-06 | Under-expressed |
| RNF169     | -0.9  | 6.19E-06 | 3.09E-05 | Under-expressed |
| STX1B      | -0.9  | 1.32E-05 | 5.99E-05 | Under-expressed |
| ZNF420     | -0.9  | 2.03E-05 | 8.68E-05 | Under-expressed |
| SNX12      | -0.9  | 3.49E-05 | 1.40E-04 | Under-expressed |
| RAI2       | -0.9  | 4.77E-05 | 1.83E-04 | Under-expressed |
| SEPTIN4    | -0.9  | 1.06E-04 | 3.68E-04 | Under-expressed |
| FBN1       | -0.9  | 1.20E-04 | 4.13E-04 | Under-expressed |
| SLIT3      | -0.9  | 2.38E-04 | 7.46E-04 | Under-expressed |
| CTAGE15    | -0.9  | 1.25E-03 | 3.15E-03 | Under-expressed |
| WASF3      | -0.9  | 0.0168   | 0.0308   | Under-expressed |
| APOH       | -0.9  | 0.0172   | 0.0313   | Under-expressed |
| ATP13A3    | -0.91 | 1.68E-11 | 5.34E-10 | Under-expressed |
| SBF2       | -0.91 | 1.29E-07 | 1.12E-06 | Under-expressed |
| HHAT       | -0.91 | 1.78E-07 | 1.47E-06 | Under-expressed |
| CREG1      | -0.91 | 3.76E-07 | 2.76E-06 | Under-expressed |
| EMCN       | -0.91 | 1.42E-06 | 8.57E-06 | Under-expressed |
| NAMPT      | -0.91 | 2.64E-06 | 1.47E-05 | Under-expressed |
| MAOA       | -0.91 | 5.42E-06 | 2.75E-05 | Under-expressed |
| CD1D       | -0.91 | 1.33E-05 | 6.01E-05 | Under-expressed |
| IFIT1      | -0.91 | 4.73E-05 | 1.82E-04 | Under-expressed |
| S1PR3      | -0.91 | 1.78E-04 | 5.81E-04 | Under-expressed |
| LOC730101  | -0.91 | 2.24E-04 | 7.09E-04 | Under-expressed |

|          |       |          |          |                 |
|----------|-------|----------|----------|-----------------|
| OASL     | -0.91 | 3.06E-04 | 9.33E-04 | Under-expressed |
| TMEM220  | -0.91 | 1.05E-03 | 2.72E-03 | Under-expressed |
| ITIH1    | -0.91 | 0.0143   | 0.0266   | Under-expressed |
| SLC31A1  | -0.92 | 8.15E-13 | 3.90E-11 | Under-expressed |
| SMIM14   | -0.92 | 7.46E-10 | 1.33E-08 | Under-expressed |
| NFIA     | -0.92 | 1.37E-09 | 2.23E-08 | Under-expressed |
| FZD4     | -0.92 | 1.45E-09 | 2.34E-08 | Under-expressed |
| POLK     | -0.92 | 3.65E-09 | 5.18E-08 | Under-expressed |
| GBE1     | -0.92 | 3.93E-09 | 5.53E-08 | Under-expressed |
| ALDH5A1  | -0.92 | 2.33E-07 | 1.83E-06 | Under-expressed |
| BHLHE40  | -0.92 | 4.60E-07 | 3.28E-06 | Under-expressed |
| SLC9B2   | -0.92 | 2.44E-05 | 1.02E-04 | Under-expressed |
| RASGRF2  | -0.92 | 3.80E-05 | 1.51E-04 | Under-expressed |
| ABCC6    | -0.92 | 5.19E-05 | 1.97E-04 | Under-expressed |
| GCSH     | -0.92 | 9.03E-05 | 3.20E-04 | Under-expressed |
| TCIM     | -0.92 | 3.21E-04 | 9.73E-04 | Under-expressed |
| STRIP2   | -0.92 | 1.01E-03 | 2.61E-03 | Under-expressed |
| ADAMTSL2 | -0.92 | 0.0104   | 0.0203   | Under-expressed |
| AHCYL2   | -0.93 | 7.14E-12 | 2.55E-10 | Under-expressed |
| MAN1A2   | -0.93 | 1.19E-11 | 3.95E-10 | Under-expressed |
| L2HGDH   | -0.93 | 2.82E-11 | 8.48E-10 | Under-expressed |
| TSHZ1    | -0.93 | 3.46E-11 | 1.01E-09 | Under-expressed |
| SLC40A1  | -0.93 | 6.94E-10 | 1.25E-08 | Under-expressed |
| WDR44    | -0.93 | 1.25E-09 | 2.07E-08 | Under-expressed |
| ETS1     | -0.93 | 2.04E-08 | 2.28E-07 | Under-expressed |
| ACAT1    | -0.93 | 2.73E-07 | 2.10E-06 | Under-expressed |
| PTPRG    | -0.93 | 5.85E-07 | 4.04E-06 | Under-expressed |
| FAT1     | -0.93 | 1.81E-06 | 1.06E-05 | Under-expressed |
| USP2     | -0.93 | 1.71E-05 | 7.48E-05 | Under-expressed |
| PDE7B    | -0.93 | 1.81E-05 | 7.85E-05 | Under-expressed |
| ADHFE1   | -0.93 | 2.53E-04 | 7.88E-04 | Under-expressed |
| SLC2A12  | -0.93 | 3.62E-04 | 1.08E-03 | Under-expressed |
| MYH11    | -0.93 | 7.69E-04 | 2.07E-03 | Under-expressed |
| NIPAL2   | -0.93 | 8.68E-04 | 2.30E-03 | Under-expressed |
| TF       | -0.93 | 0.0241   | 0.0423   | Under-expressed |
| ALDH9A1  | -0.94 | 1.25E-15 | 1.21E-13 | Under-expressed |
| OSBPL11  | -0.94 | 2.47E-15 | 2.27E-13 | Under-expressed |
| USF3     | -0.94 | 5.32E-10 | 1.01E-08 | Under-expressed |
| PLEKHG1  | -0.94 | 2.52E-09 | 3.77E-08 | Under-expressed |
| KLHL26   | -0.94 | 6.10E-08 | 5.82E-07 | Under-expressed |
| FRMD4B   | -0.94 | 1.16E-07 | 1.01E-06 | Under-expressed |
| ERO1B    | -0.94 | 1.58E-07 | 1.33E-06 | Under-expressed |
| HIVEP1   | -0.94 | 4.26E-07 | 3.07E-06 | Under-expressed |
| GNG12    | -0.94 | 5.04E-07 | 3.55E-06 | Under-expressed |
| ZNF425   | -0.94 | 9.55E-07 | 6.13E-06 | Under-expressed |
| ARHGAP24 | -0.94 | 1.45E-05 | 6.45E-05 | Under-expressed |
| MYSM1    | -0.94 | 1.74E-05 | 7.60E-05 | Under-expressed |
| VSTM4    | -0.94 | 1.21E-04 | 4.13E-04 | Under-expressed |
| SH3RF2   | -0.94 | 4.60E-03 | 9.90E-03 | Under-expressed |
| TMEM192  | -0.95 | 3.52E-13 | 1.89E-11 | Under-expressed |
| DCUN1D1  | -0.95 | 3.51E-10 | 7.08E-09 | Under-expressed |
| NBEAL1   | -0.95 | 2.65E-08 | 2.86E-07 | Under-expressed |
| MYCL     | -0.95 | 1.65E-06 | 9.77E-06 | Under-expressed |
| GIMAP7   | -0.95 | 2.00E-06 | 1.15E-05 | Under-expressed |
| SARDH    | -0.95 | 1.24E-03 | 3.13E-03 | Under-expressed |
| RBP5     | -0.95 | 5.53E-03 | 0.0116   | Under-expressed |
| MMRN2    | -0.96 | 1.66E-10 | 3.76E-09 | Under-expressed |

|          |       |          |          |                 |
|----------|-------|----------|----------|-----------------|
| PDE4DIP  | -0.96 | 1.78E-10 | 3.96E-09 | Under-expressed |
| SCYL2    | -0.96 | 1.46E-09 | 2.36E-08 | Under-expressed |
| ETFBKMT  | -0.96 | 5.75E-09 | 7.65E-08 | Under-expressed |
| REV3L    | -0.96 | 2.59E-08 | 2.80E-07 | Under-expressed |
| DPP8     | -0.96 | 9.33E-08 | 8.43E-07 | Under-expressed |
| TSC22D2  | -0.96 | 1.17E-07 | 1.02E-06 | Under-expressed |
| CEP97    | -0.96 | 2.36E-07 | 1.85E-06 | Under-expressed |
| METTTL14 | -0.96 | 2.55E-07 | 1.98E-06 | Under-expressed |
| SYNE3    | -0.96 | 6.79E-07 | 4.60E-06 | Under-expressed |
| PCSK6    | -0.96 | 2.18E-06 | 1.24E-05 | Under-expressed |
| SATB1    | -0.96 | 4.54E-05 | 1.75E-04 | Under-expressed |
| PBLD     | -0.96 | 5.58E-05 | 2.10E-04 | Under-expressed |
| MAST4    | -0.96 | 7.58E-05 | 2.75E-04 | Under-expressed |
| AMOTL1   | -0.96 | 1.77E-04 | 5.79E-04 | Under-expressed |
| CGN      | -0.96 | 2.06E-04 | 6.61E-04 | Under-expressed |
| NOMO2    | -0.96 | 2.60E-04 | 8.08E-04 | Under-expressed |
| DPY19L3  | -0.96 | 2.93E-04 | 8.95E-04 | Under-expressed |
| NAGS     | -0.96 | 2.69E-03 | 6.19E-03 | Under-expressed |
| ITSN1    | -0.97 | 3.17E-13 | 1.76E-11 | Under-expressed |
| PGM2     | -0.97 | 9.72E-11 | 2.41E-09 | Under-expressed |
| TBC1D8B  | -0.97 | 1.36E-09 | 2.23E-08 | Under-expressed |
| NOS3     | -0.97 | 1.16E-07 | 1.01E-06 | Under-expressed |
| SLC39A8  | -0.97 | 1.16E-07 | 1.01E-06 | Under-expressed |
| DPYD     | -0.97 | 4.22E-06 | 2.22E-05 | Under-expressed |
| TGFBR3   | -0.97 | 5.53E-06 | 2.80E-05 | Under-expressed |
| LATS1    | -0.97 | 7.35E-06 | 3.59E-05 | Under-expressed |
| MNS1     | -0.97 | 7.87E-06 | 3.81E-05 | Under-expressed |
| LRCH3    | -0.97 | 1.44E-05 | 6.44E-05 | Under-expressed |
| RIF1     | -0.97 | 2.03E-05 | 8.69E-05 | Under-expressed |
| CAVIN2   | -0.97 | 7.21E-05 | 2.63E-04 | Under-expressed |
| CLIC5    | -0.97 | 9.72E-05 | 3.42E-04 | Under-expressed |
| DGAT2    | -0.97 | 7.05E-04 | 1.92E-03 | Under-expressed |
| KMO      | -0.97 | 3.14E-03 | 7.10E-03 | Under-expressed |
| SLC38A3  | -0.97 | 5.38E-03 | 0.0113   | Under-expressed |
| ITIH3    | -0.97 | 0.0122   | 0.0231   | Under-expressed |
| LYST     | -0.98 | 5.70E-11 | 1.54E-09 | Under-expressed |
| NEURL1B  | -0.98 | 3.94E-10 | 7.84E-09 | Under-expressed |
| TRIM35   | -0.98 | 4.92E-09 | 6.70E-08 | Under-expressed |
| MICAL2   | -0.98 | 1.97E-07 | 1.60E-06 | Under-expressed |
| IFIT2    | -0.98 | 8.42E-07 | 5.50E-06 | Under-expressed |
| FKBP5    | -0.98 | 8.77E-07 | 5.71E-06 | Under-expressed |
| CCDC186  | -0.98 | 1.07E-06 | 6.76E-06 | Under-expressed |
| ST6GAL1  | -0.98 | 2.35E-06 | 1.33E-05 | Under-expressed |
| DOCK1    | -0.98 | 5.34E-05 | 2.02E-04 | Under-expressed |
| COL15A1  | -0.98 | 6.46E-05 | 2.38E-04 | Under-expressed |
| FBXO27   | -0.98 | 3.57E-04 | 1.07E-03 | Under-expressed |
| IGFBP5   | -0.98 | 4.05E-04 | 1.19E-03 | Under-expressed |
| PLIN4    | -0.98 | 6.91E-04 | 1.89E-03 | Under-expressed |
| ABCG2    | -0.98 | 7.46E-04 | 2.02E-03 | Under-expressed |
| UGP2     | -0.99 | 3.38E-13 | 1.83E-11 | Under-expressed |
| MEGF9    | -0.99 | 3.43E-11 | 1.01E-09 | Under-expressed |
| SAR1B    | -0.99 | 1.22E-10 | 2.90E-09 | Under-expressed |
| PPARA    | -0.99 | 4.59E-10 | 8.93E-09 | Under-expressed |
| SYNE1    | -0.99 | 3.60E-09 | 5.12E-08 | Under-expressed |
| KIF13A   | -0.99 | 1.68E-07 | 1.40E-06 | Under-expressed |
| PROS1    | -0.99 | 5.70E-07 | 3.95E-06 | Under-expressed |
| PAFAH1B2 | -0.99 | 1.16E-06 | 7.23E-06 | Under-expressed |

|          |       |          |          |                 |
|----------|-------|----------|----------|-----------------|
| TUT4     | -0.99 | 2.01E-05 | 8.63E-05 | Under-expressed |
| TFR2     | -0.99 | 1.06E-03 | 2.73E-03 | Under-expressed |
| TM6SF2   | -0.99 | 1.21E-03 | 3.06E-03 | Under-expressed |
| EHBP1    | -1    | 6.74E-17 | 9.13E-15 | Under-expressed |
| DYNLL2   | -1    | 2.52E-11 | 7.66E-10 | Under-expressed |
| FAM214A  | -1    | 4.85E-11 | 1.35E-09 | Under-expressed |
| GASK1B   | -1    | 4.46E-08 | 4.45E-07 | Under-expressed |
| TTBK2    | -1    | 4.66E-08 | 4.62E-07 | Under-expressed |
| ABHD15   | -1    | 1.05E-07 | 9.27E-07 | Under-expressed |
| ABHD6    | -1    | 4.39E-07 | 3.15E-06 | Under-expressed |
| GMCL1    | -1    | 9.62E-06 | 4.54E-05 | Under-expressed |
| ELOVL6   | -1    | 3.35E-05 | 1.35E-04 | Under-expressed |
| PON3     | -1    | 7.59E-05 | 2.75E-04 | Under-expressed |
| PDP2     | -1.01 | 3.32E-13 | 1.82E-11 | Under-expressed |
| SASH1    | -1.01 | 1.57E-12 | 7.08E-11 | Under-expressed |
| TRAPPC8  | -1.01 | 5.58E-10 | 1.05E-08 | Under-expressed |
| C9ORF72  | -1.01 | 6.08E-10 | 1.12E-08 | Under-expressed |
| GJD3     | -1.01 | 2.70E-08 | 2.91E-07 | Under-expressed |
| TXNIP    | -1.01 | 5.41E-08 | 5.27E-07 | Under-expressed |
| MYO18A   | -1.01 | 5.97E-08 | 5.71E-07 | Under-expressed |
| 2-Mar    | -1.01 | 2.65E-07 | 2.05E-06 | Under-expressed |
| ADAM10   | -1.01 | 7.53E-07 | 5.01E-06 | Under-expressed |
| RGS5     | -1.01 | 2.97E-06 | 1.63E-05 | Under-expressed |
| ADGRL2   | -1.01 | 1.03E-05 | 4.81E-05 | Under-expressed |
| CFH      | -1.01 | 3.49E-04 | 1.04E-03 | Under-expressed |
| COL4A4   | -1.01 | 5.96E-04 | 1.65E-03 | Under-expressed |
| SERPINA5 | -1.01 | 7.80E-04 | 2.10E-03 | Under-expressed |
| TTC9     | -1.01 | 8.07E-04 | 2.17E-03 | Under-expressed |
| CD36     | -1.01 | 1.18E-03 | 3.00E-03 | Under-expressed |
| GIPC2    | -1.01 | 1.23E-03 | 3.10E-03 | Under-expressed |
| ABCC2    | -1.01 | 4.46E-03 | 9.63E-03 | Under-expressed |
| F12      | -1.01 | 9.86E-03 | 0.0193   | Under-expressed |
| MYO1B    | -1.02 | 1.88E-12 | 8.25E-11 | Under-expressed |
| FRY      | -1.02 | 3.68E-09 | 5.22E-08 | Under-expressed |
| TRIM56   | -1.02 | 1.80E-07 | 1.48E-06 | Under-expressed |
| ARHGEF26 | -1.02 | 8.79E-06 | 4.20E-05 | Under-expressed |
| OPHN1    | -1.02 | 1.38E-05 | 6.22E-05 | Under-expressed |
| CDH23    | -1.02 | 2.13E-05 | 9.07E-05 | Under-expressed |
| CCNI     | -1.02 | 7.53E-05 | 2.73E-04 | Under-expressed |
| INHBE    | -1.02 | 1.13E-03 | 2.89E-03 | Under-expressed |
| F2       | -1.02 | 8.09E-03 | 0.0162   | Under-expressed |
| ALB      | -1.02 | 0.0121   | 0.0231   | Under-expressed |
| SLC35D1  | -1.03 | 6.00E-14 | 4.18E-12 | Under-expressed |
| ABHD2    | -1.03 | 8.76E-11 | 2.20E-09 | Under-expressed |
| IQGAP2   | -1.03 | 1.77E-10 | 3.94E-09 | Under-expressed |
| RMDN2    | -1.03 | 5.55E-10 | 1.04E-08 | Under-expressed |
| ALDH2    | -1.03 | 1.76E-08 | 2.01E-07 | Under-expressed |
| TMEM133  | -1.03 | 7.30E-08 | 6.80E-07 | Under-expressed |
| TMEM204  | -1.03 | 2.25E-07 | 1.79E-06 | Under-expressed |
| EMP1     | -1.03 | 8.13E-07 | 5.35E-06 | Under-expressed |
| FGD4     | -1.03 | 2.19E-06 | 1.25E-05 | Under-expressed |
| FBLN7    | -1.03 | 3.04E-06 | 1.66E-05 | Under-expressed |
| SGCB     | -1.03 | 8.75E-05 | 3.12E-04 | Under-expressed |
| FNDC4    | -1.03 | 1.64E-04 | 5.38E-04 | Under-expressed |
| MBNL3    | -1.03 | 5.29E-04 | 1.50E-03 | Under-expressed |
| KLB      | -1.03 | 3.19E-03 | 7.19E-03 | Under-expressed |
| HSD17B4  | -1.04 | 2.37E-10 | 5.08E-09 | Under-expressed |

|            |       |          |          |                 |
|------------|-------|----------|----------|-----------------|
| SYNPO2     | -1.04 | 6.25E-09 | 8.22E-08 | Under-expressed |
| SATB2      | -1.04 | 4.84E-07 | 3.43E-06 | Under-expressed |
| CBLN3      | -1.04 | 5.01E-07 | 3.54E-06 | Under-expressed |
| OLFM2      | -1.04 | 7.43E-06 | 3.62E-05 | Under-expressed |
| PALMD      | -1.04 | 1.99E-05 | 8.54E-05 | Under-expressed |
| ETNK2      | -1.04 | 6.26E-04 | 1.73E-03 | Under-expressed |
| APOB       | -1.04 | 1.11E-03 | 2.84E-03 | Under-expressed |
| SETD7      | -1.05 | 5.19E-13 | 2.63E-11 | Under-expressed |
| ZNF791     | -1.05 | 4.15E-08 | 4.20E-07 | Under-expressed |
| PEAR1      | -1.05 | 1.06E-07 | 9.40E-07 | Under-expressed |
| KCTD20     | -1.05 | 5.12E-07 | 3.60E-06 | Under-expressed |
| SEMA6D     | -1.05 | 2.18E-05 | 9.27E-05 | Under-expressed |
| IQCIN      | -1.05 | 4.85E-05 | 1.86E-04 | Under-expressed |
| ARHGEF37   | -1.05 | 1.13E-04 | 3.91E-04 | Under-expressed |
| KLKB1      | -1.05 | 5.75E-04 | 1.61E-03 | Under-expressed |
| FGF2       | -1.05 | 1.48E-03 | 3.65E-03 | Under-expressed |
| VWA8       | -1.06 | 8.13E-13 | 3.90E-11 | Under-expressed |
| RAPGEF2    | -1.06 | 5.13E-12 | 1.91E-10 | Under-expressed |
| HIPK2      | -1.06 | 6.43E-12 | 2.33E-10 | Under-expressed |
| CPEB2      | -1.06 | 5.44E-11 | 1.49E-09 | Under-expressed |
| TOM1L1     | -1.06 | 2.00E-10 | 4.35E-09 | Under-expressed |
| CTSO       | -1.06 | 3.23E-09 | 4.67E-08 | Under-expressed |
| NBPF11     | -1.06 | 6.82E-09 | 8.86E-08 | Under-expressed |
| ST6GALNAC3 | -1.06 | 1.51E-07 | 1.29E-06 | Under-expressed |
| SLCO2B1    | -1.06 | 1.23E-06 | 7.60E-06 | Under-expressed |
| RHOBTB3    | -1.06 | 2.19E-06 | 1.25E-05 | Under-expressed |
| TSC22D3    | -1.06 | 2.38E-06 | 1.34E-05 | Under-expressed |
| C1S        | -1.06 | 2.50E-06 | 1.40E-05 | Under-expressed |
| KCNJ8      | -1.06 | 5.29E-06 | 2.69E-05 | Under-expressed |
| LTBP1      | -1.06 | 6.91E-05 | 2.53E-04 | Under-expressed |
| GLUD2      | -1.06 | 5.31E-04 | 1.50E-03 | Under-expressed |
| ARNTL      | -1.07 | 2.20E-14 | 1.71E-12 | Under-expressed |
| KLHL20     | -1.07 | 6.28E-14 | 4.32E-12 | Under-expressed |
| DHRS4-AS1  | -1.07 | 4.13E-13 | 2.14E-11 | Under-expressed |
| RAPH1      | -1.07 | 3.58E-12 | 1.39E-10 | Under-expressed |
| NNT        | -1.07 | 3.30E-10 | 6.73E-09 | Under-expressed |
| MAFB       | -1.07 | 4.58E-10 | 8.93E-09 | Under-expressed |
| ITPR1      | -1.07 | 1.22E-08 | 1.46E-07 | Under-expressed |
| RBM43      | -1.07 | 7.27E-08 | 6.78E-07 | Under-expressed |
| LMOD1      | -1.07 | 3.71E-07 | 2.73E-06 | Under-expressed |
| NRN1       | -1.07 | 1.68E-05 | 7.36E-05 | Under-expressed |
| FCN3       | -1.07 | 1.62E-03 | 3.94E-03 | Under-expressed |
| CPEB4      | -1.08 | 6.58E-10 | 1.19E-08 | Under-expressed |
| PRKAG2     | -1.08 | 6.68E-10 | 1.21E-08 | Under-expressed |
| DOCK9      | -1.08 | 8.49E-10 | 1.49E-08 | Under-expressed |
| HECW2      | -1.08 | 8.53E-10 | 1.50E-08 | Under-expressed |
| ZNF619     | -1.08 | 2.49E-09 | 3.72E-08 | Under-expressed |
| SORD       | -1.08 | 7.38E-07 | 4.93E-06 | Under-expressed |
| TRIM22     | -1.08 | 1.16E-06 | 7.24E-06 | Under-expressed |
| PDE3B      | -1.08 | 1.99E-06 | 1.15E-05 | Under-expressed |
| HTR2B      | -1.08 | 2.21E-05 | 9.36E-05 | Under-expressed |
| ALDH1A1    | -1.08 | 2.44E-04 | 7.63E-04 | Under-expressed |
| SPATA41    | -1.08 | 5.40E-04 | 1.52E-03 | Under-expressed |
| CYP2D7     | -1.08 | 4.51E-03 | 9.73E-03 | Under-expressed |
| SEC24D     | -1.09 | 5.99E-11 | 1.59E-09 | Under-expressed |
| SECISBP2L  | -1.09 | 1.50E-09 | 2.41E-08 | Under-expressed |
| TOB1       | -1.09 | 6.78E-09 | 8.82E-08 | Under-expressed |

|            |       |          |          |                 |
|------------|-------|----------|----------|-----------------|
| FAM13A     | -1.09 | 3.14E-07 | 2.37E-06 | Under-expressed |
| EPB41L5    | -1.09 | 5.97E-07 | 4.11E-06 | Under-expressed |
| MMRN1      | -1.09 | 1.86E-06 | 1.08E-05 | Under-expressed |
| DAAM1      | -1.09 | 3.01E-06 | 1.65E-05 | Under-expressed |
| FOLH1      | -1.09 | 1.22E-05 | 5.60E-05 | Under-expressed |
| ADCY1      | -1.09 | 1.77E-03 | 4.28E-03 | Under-expressed |
| SLC6A12    | -1.09 | 3.18E-03 | 7.17E-03 | Under-expressed |
| CYP2D6     | -1.09 | 0.02     | 0.0358   | Under-expressed |
| PGRMC1     | -1.1  | 3.74E-13 | 1.98E-11 | Under-expressed |
| GADD45A    | -1.1  | 3.75E-11 | 1.08E-09 | Under-expressed |
| MAP3K2     | -1.1  | 4.48E-11 | 1.25E-09 | Under-expressed |
| ABTB2      | -1.1  | 9.82E-11 | 2.43E-09 | Under-expressed |
| PRKCE      | -1.1  | 3.05E-10 | 6.28E-09 | Under-expressed |
| MTHFD1     | -1.1  | 2.10E-09 | 3.21E-08 | Under-expressed |
| FHL1       | -1.1  | 7.89E-09 | 1.00E-07 | Under-expressed |
| MYORG      | -1.1  | 1.06E-08 | 1.29E-07 | Under-expressed |
| ARL13B     | -1.1  | 1.30E-08 | 1.55E-07 | Under-expressed |
| SEC16B     | -1.1  | 1.58E-07 | 1.34E-06 | Under-expressed |
| STARD5     | -1.1  | 6.13E-07 | 4.21E-06 | Under-expressed |
| CYBRD1     | -1.1  | 1.28E-06 | 7.86E-06 | Under-expressed |
| PCDH17     | -1.1  | 1.35E-06 | 8.25E-06 | Under-expressed |
| MYO16      | -1.1  | 3.52E-05 | 1.41E-04 | Under-expressed |
| TBX15      | -1.1  | 2.57E-04 | 7.99E-04 | Under-expressed |
| SLC30A1    | -1.11 | 3.81E-11 | 1.09E-09 | Under-expressed |
| TBCEL      | -1.11 | 5.23E-11 | 1.45E-09 | Under-expressed |
| BROX       | -1.11 | 6.19E-08 | 5.88E-07 | Under-expressed |
| TNPO3      | -1.11 | 3.19E-07 | 2.41E-06 | Under-expressed |
| ACADSB     | -1.11 | 5.65E-07 | 3.92E-06 | Under-expressed |
| ZNF521     | -1.11 | 7.71E-07 | 5.11E-06 | Under-expressed |
| RP2        | -1.11 | 1.40E-06 | 8.49E-06 | Under-expressed |
| STAG1      | -1.11 | 1.95E-06 | 1.13E-05 | Under-expressed |
| TSKU       | -1.11 | 1.54E-05 | 6.81E-05 | Under-expressed |
| MAP7       | -1.11 | 5.29E-05 | 2.01E-04 | Under-expressed |
| FBLN5      | -1.11 | 5.32E-05 | 2.02E-04 | Under-expressed |
| ST6GALNAC2 | -1.11 | 1.77E-04 | 5.78E-04 | Under-expressed |
| MMUT       | -1.12 | 2.01E-12 | 8.62E-11 | Under-expressed |
| NEDD4      | -1.12 | 6.98E-09 | 9.02E-08 | Under-expressed |
| MAN2A1     | -1.12 | 3.63E-08 | 3.77E-07 | Under-expressed |
| EPHX2      | -1.12 | 9.36E-08 | 8.46E-07 | Under-expressed |
| LIN52      | -1.12 | 3.02E-07 | 2.30E-06 | Under-expressed |
| CDC14B     | -1.12 | 4.13E-07 | 2.99E-06 | Under-expressed |
| SETBP1     | -1.12 | 8.28E-07 | 5.43E-06 | Under-expressed |
| SLC7A2     | -1.12 | 1.19E-05 | 5.45E-05 | Under-expressed |
| IFNLR1     | -1.12 | 1.90E-05 | 8.16E-05 | Under-expressed |
| PI4K2B     | -1.13 | 1.72E-17 | 2.77E-15 | Under-expressed |
| SLC35A3    | -1.13 | 1.13E-15 | 1.11E-13 | Under-expressed |
| ABHD18     | -1.13 | 1.84E-10 | 4.06E-09 | Under-expressed |
| ERCC6L2    | -1.13 | 1.08E-09 | 1.83E-08 | Under-expressed |
| SORL1      | -1.13 | 2.96E-08 | 3.16E-07 | Under-expressed |
| RFTN1      | -1.13 | 2.56E-07 | 1.98E-06 | Under-expressed |
| SIRPB1     | -1.13 | 1.62E-06 | 9.65E-06 | Under-expressed |
| LDHD       | -1.13 | 1.07E-04 | 3.71E-04 | Under-expressed |
| AZGP1      | -1.13 | 2.13E-03 | 5.05E-03 | Under-expressed |
| TMPRSS6    | -1.13 | 2.90E-03 | 6.61E-03 | Under-expressed |
| RBP4       | -1.13 | 3.12E-03 | 7.06E-03 | Under-expressed |
| F7         | -1.13 | 3.34E-03 | 7.48E-03 | Under-expressed |
| PITPNM2    | -1.14 | 1.99E-13 | 1.22E-11 | Under-expressed |

|          |       |          |          |                 |
|----------|-------|----------|----------|-----------------|
| BCKDHB   | -1.14 | 5.40E-12 | 1.99E-10 | Under-expressed |
| ZKSCAN1  | -1.14 | 1.04E-11 | 3.53E-10 | Under-expressed |
| CDH5     | -1.14 | 1.65E-11 | 5.30E-10 | Under-expressed |
| LDB2     | -1.14 | 3.07E-10 | 6.30E-09 | Under-expressed |
| DDX60    | -1.14 | 1.06E-07 | 9.40E-07 | Under-expressed |
| DPP4     | -1.14 | 1.64E-05 | 7.23E-05 | Under-expressed |
| PNPLA3   | -1.14 | 8.22E-05 | 2.95E-04 | Under-expressed |
| AMDHD1   | -1.14 | 9.25E-04 | 2.44E-03 | Under-expressed |
| ZNF680   | -1.15 | 1.17E-14 | 9.61E-13 | Under-expressed |
| COBLL1   | -1.15 | 5.98E-10 | 1.11E-08 | Under-expressed |
| SC5D     | -1.15 | 8.82E-10 | 1.54E-08 | Under-expressed |
| EGFR     | -1.15 | 1.07E-07 | 9.44E-07 | Under-expressed |
| TLCD4    | -1.15 | 1.09E-07 | 9.58E-07 | Under-expressed |
| CACNB2   | -1.15 | 1.01E-06 | 6.43E-06 | Under-expressed |
| EFHD1    | -1.15 | 3.63E-05 | 1.45E-04 | Under-expressed |
| BDH1     | -1.15 | 1.75E-04 | 5.74E-04 | Under-expressed |
| PIPOX    | -1.15 | 5.45E-04 | 1.53E-03 | Under-expressed |
| ALDH1L1  | -1.15 | 0.0137   | 0.0256   | Under-expressed |
| ETFDH    | -1.16 | 3.89E-16 | 4.25E-14 | Under-expressed |
| MERTK    | -1.16 | 1.81E-07 | 1.49E-06 | Under-expressed |
| F5       | -1.16 | 2.35E-05 | 9.89E-05 | Under-expressed |
| RNF144B  | -1.17 | 5.48E-13 | 2.76E-11 | Under-expressed |
| ADGRA3   | -1.17 | 3.02E-12 | 1.20E-10 | Under-expressed |
| KLHL8    | -1.17 | 2.62E-11 | 7.93E-10 | Under-expressed |
| ACACB    | -1.17 | 1.63E-08 | 1.88E-07 | Under-expressed |
| STT3B    | -1.17 | 2.30E-08 | 2.53E-07 | Under-expressed |
| FAS      | -1.17 | 2.33E-08 | 2.55E-07 | Under-expressed |
| CGNL1    | -1.17 | 1.49E-07 | 1.27E-06 | Under-expressed |
| G0S2     | -1.17 | 1.20E-04 | 4.11E-04 | Under-expressed |
| CYP4A11  | -1.17 | 5.07E-03 | 0.0108   | Under-expressed |
| TTR      | -1.17 | 8.05E-03 | 0.0162   | Under-expressed |
| MTM1     | -1.18 | 6.93E-12 | 2.48E-10 | Under-expressed |
| SLC25A40 | -1.18 | 3.35E-08 | 3.51E-07 | Under-expressed |
| ATF2     | -1.18 | 1.93E-07 | 1.56E-06 | Under-expressed |
| SYTL4    | -1.18 | 6.75E-07 | 4.58E-06 | Under-expressed |
| MIR100HG | -1.18 | 2.41E-06 | 1.36E-05 | Under-expressed |
| LEPR     | -1.18 | 2.35E-04 | 7.40E-04 | Under-expressed |
| ATE1     | -1.19 | 9.98E-09 | 1.23E-07 | Under-expressed |
| MASP2    | -1.19 | 0.0121   | 0.0231   | Under-expressed |
| ACADM    | -1.2  | 5.69E-13 | 2.82E-11 | Under-expressed |
| RBL2     | -1.2  | 3.50E-12 | 1.37E-10 | Under-expressed |
| S1PR1    | -1.2  | 3.99E-11 | 1.13E-09 | Under-expressed |
| ADAT1    | -1.2  | 9.93E-11 | 2.45E-09 | Under-expressed |
| MANEA    | -1.2  | 1.33E-08 | 1.57E-07 | Under-expressed |
| MAN1A1   | -1.2  | 5.37E-08 | 5.25E-07 | Under-expressed |
| DOCK5    | -1.2  | 1.41E-07 | 1.21E-06 | Under-expressed |
| ABCA10   | -1.2  | 2.20E-05 | 9.32E-05 | Under-expressed |
| TPPP     | -1.2  | 8.20E-05 | 2.95E-04 | Under-expressed |
| ELN      | -1.2  | 1.77E-04 | 5.77E-04 | Under-expressed |
| ALAD     | -1.21 | 2.84E-13 | 1.64E-11 | Under-expressed |
| ARL15    | -1.21 | 9.92E-11 | 2.45E-09 | Under-expressed |
| PLPP3    | -1.21 | 1.20E-09 | 2.01E-08 | Under-expressed |
| TAOK1    | -1.21 | 1.22E-08 | 1.46E-07 | Under-expressed |
| ST3GAL6  | -1.21 | 6.03E-08 | 5.76E-07 | Under-expressed |
| GTF2I    | -1.21 | 1.39E-06 | 8.44E-06 | Under-expressed |
| NR2C2    | -1.21 | 5.03E-06 | 2.58E-05 | Under-expressed |
| MAMDC4   | -1.21 | 5.50E-06 | 2.79E-05 | Under-expressed |



|          |       |          |          |                 |
|----------|-------|----------|----------|-----------------|
| RBBP5    | -1.22 | 1.28E-10 | 3.04E-09 | Under-expressed |
| TRIM2    | -1.22 | 2.09E-10 | 4.54E-09 | Under-expressed |
| TP11P2   | -1.22 | 2.50E-10 | 5.30E-09 | Under-expressed |
| BAG4     | -1.22 | 1.33E-08 | 1.57E-07 | Under-expressed |
| CYP2U1   | -1.22 | 2.76E-08 | 2.96E-07 | Under-expressed |
| ZMAT1    | -1.22 | 5.24E-07 | 3.67E-06 | Under-expressed |
| FICD     | -1.23 | 3.09E-13 | 1.74E-11 | Under-expressed |
| RORA     | -1.23 | 2.89E-12 | 1.16E-10 | Under-expressed |
| CPEB3    | -1.23 | 7.97E-11 | 2.04E-09 | Under-expressed |
| TOR1AIP2 | -1.23 | 7.88E-10 | 1.40E-08 | Under-expressed |
| SAMHD1   | -1.23 | 5.65E-09 | 7.52E-08 | Under-expressed |
| SOX7     | -1.23 | 1.33E-08 | 1.58E-07 | Under-expressed |
| PRRG4    | -1.23 | 1.36E-08 | 1.60E-07 | Under-expressed |
| SELENOP  | -1.23 | 3.06E-08 | 3.25E-07 | Under-expressed |
| SLC16A13 | -1.23 | 8.00E-08 | 7.37E-07 | Under-expressed |
| KBTBD4   | -1.23 | 3.25E-07 | 2.44E-06 | Under-expressed |
| MATN2    | -1.23 | 2.73E-06 | 1.51E-05 | Under-expressed |
| THSD4    | -1.23 | 2.92E-04 | 8.93E-04 | Under-expressed |
| BAAT     | -1.23 | 6.59E-04 | 1.81E-03 | Under-expressed |
| ARHGAP42 | -1.24 | 3.63E-11 | 1.05E-09 | Under-expressed |
| PER3     | -1.24 | 2.85E-10 | 5.94E-09 | Under-expressed |
| SORBS2   | -1.24 | 7.13E-08 | 6.67E-07 | Under-expressed |
| CA2      | -1.24 | 6.19E-07 | 4.24E-06 | Under-expressed |
| PPL      | -1.24 | 8.31E-06 | 3.99E-05 | Under-expressed |
| EPHX1    | -1.24 | 9.61E-06 | 4.54E-05 | Under-expressed |
| PTPRB    | -1.25 | 9.69E-10 | 1.67E-08 | Under-expressed |
| CREBRF   | -1.25 | 1.21E-08 | 1.45E-07 | Under-expressed |
| PPP4R4   | -1.25 | 1.90E-07 | 1.55E-06 | Under-expressed |
| RUNDC3B  | -1.25 | 7.90E-06 | 3.82E-05 | Under-expressed |
| NTN1     | -1.25 | 1.69E-05 | 7.42E-05 | Under-expressed |
| SLC4A4   | -1.25 | 4.55E-05 | 1.76E-04 | Under-expressed |
| ANGPTL3  | -1.25 | 2.95E-03 | 6.71E-03 | Under-expressed |
| HEY2     | -1.26 | 1.72E-10 | 3.87E-09 | Under-expressed |
| SLC47A1  | -1.26 | 1.63E-04 | 5.36E-04 | Under-expressed |
| SERPIND1 | -1.26 | 3.04E-03 | 6.89E-03 | Under-expressed |
| MID2     | -1.27 | 4.46E-08 | 4.45E-07 | Under-expressed |
| PLSCR4   | -1.27 | 8.09E-08 | 7.44E-07 | Under-expressed |
| LMTK2    | -1.27 | 1.50E-06 | 8.99E-06 | Under-expressed |
| PCSK5    | -1.27 | 6.36E-06 | 3.17E-05 | Under-expressed |
| CYP2C9   | -1.27 | 3.95E-03 | 8.65E-03 | Under-expressed |
| EDNRB    | -1.28 | 6.22E-11 | 1.64E-09 | Under-expressed |
| TSTD2    | -1.28 | 5.53E-08 | 5.36E-07 | Under-expressed |
| LIMS1    | -1.28 | 9.76E-06 | 4.60E-05 | Under-expressed |
| PLCL2    | -1.29 | 1.78E-09 | 2.78E-08 | Under-expressed |
| DMD      | -1.29 | 2.88E-07 | 2.20E-06 | Under-expressed |
| FGGY     | -1.29 | 3.11E-05 | 1.26E-04 | Under-expressed |
| CLTRN    | -1.29 | 8.87E-05 | 3.16E-04 | Under-expressed |
| ANGPTL1  | -1.29 | 2.52E-04 | 7.86E-04 | Under-expressed |
| HPX      | -1.29 | 1.83E-03 | 4.39E-03 | Under-expressed |
| SLC1A2   | -1.29 | 6.45E-03 | 0.0133   | Under-expressed |
| CFHR3    | -1.29 | 7.47E-03 | 0.0151   | Under-expressed |
| SEMA5A   | -1.3  | 1.60E-08 | 1.85E-07 | Under-expressed |
| FILIP1   | -1.3  | 1.67E-08 | 1.91E-07 | Under-expressed |
| GRAMD1C  | -1.3  | 1.95E-07 | 1.58E-06 | Under-expressed |
| SELENBP1 | -1.3  | 1.05E-06 | 6.69E-06 | Under-expressed |
| PIEZO2   | -1.3  | 2.21E-05 | 9.35E-05 | Under-expressed |
| ATP2B2   | -1.3  | 2.89E-04 | 8.85E-04 | Under-expressed |

|          |       |          |          |                 |
|----------|-------|----------|----------|-----------------|
| CAT      | -1.31 | 4.42E-14 | 3.19E-12 | Under-expressed |
| CLOCK    | -1.31 | 1.23E-09 | 2.05E-08 | Under-expressed |
| SLC25A15 | -1.31 | 1.30E-09 | 2.14E-08 | Under-expressed |
| RREB1    | -1.31 | 8.50E-09 | 1.07E-07 | Under-expressed |
| MYO9A    | -1.31 | 1.71E-07 | 1.43E-06 | Under-expressed |
| PLCH2    | -1.31 | 2.05E-04 | 6.56E-04 | Under-expressed |
| MAT1A    | -1.31 | 1.17E-03 | 2.97E-03 | Under-expressed |
| ATP11C   | -1.32 | 1.64E-14 | 1.31E-12 | Under-expressed |
| HERC3    | -1.32 | 2.87E-11 | 8.57E-10 | Under-expressed |
| CES2     | -1.32 | 2.65E-06 | 1.47E-05 | Under-expressed |
| ADH1A    | -1.32 | 2.71E-03 | 6.23E-03 | Under-expressed |
| SLC25A34 | -1.33 | 8.20E-09 | 1.03E-07 | Under-expressed |
| MCC      | -1.33 | 1.82E-07 | 1.50E-06 | Under-expressed |
| KNL1     | -1.33 | 1.98E-07 | 1.60E-06 | Under-expressed |
| CDA      | -1.33 | 8.61E-05 | 3.08E-04 | Under-expressed |
| COL27A1  | -1.33 | 1.81E-04 | 5.91E-04 | Under-expressed |
| LONP2    | -1.34 | 1.98E-19 | 8.24E-17 | Under-expressed |
| APOOL    | -1.34 | 3.52E-13 | 1.89E-11 | Under-expressed |
| PCK2     | -1.34 | 6.43E-08 | 6.09E-07 | Under-expressed |
| FAM45BP  | -1.34 | 7.37E-08 | 6.84E-07 | Under-expressed |
| SHMT1    | -1.34 | 1.31E-07 | 1.13E-06 | Under-expressed |
| GPAM     | -1.34 | 6.14E-05 | 2.28E-04 | Under-expressed |
| SMARCA2  | -1.35 | 5.31E-14 | 3.79E-12 | Under-expressed |
| FAM124B  | -1.35 | 5.92E-09 | 7.84E-08 | Under-expressed |
| IL33     | -1.35 | 1.20E-07 | 1.05E-06 | Under-expressed |
| LRRC3    | -1.35 | 3.42E-07 | 2.55E-06 | Under-expressed |
| SLC27A2  | -1.35 | 1.76E-06 | 1.03E-05 | Under-expressed |
| FAM149A  | -1.35 | 5.91E-06 | 2.97E-05 | Under-expressed |
| PRG4     | -1.35 | 1.30E-03 | 3.28E-03 | Under-expressed |
| ENTPD5   | -1.36 | 8.86E-13 | 4.22E-11 | Under-expressed |
| GALNT15  | -1.36 | 9.56E-09 | 1.18E-07 | Under-expressed |
| CYP4X1   | -1.36 | 2.26E-07 | 1.79E-06 | Under-expressed |
| NBPF14   | -1.36 | 6.08E-07 | 4.18E-06 | Under-expressed |
| ROCK2    | -1.36 | 9.75E-07 | 6.24E-06 | Under-expressed |
| ARHGEF35 | -1.36 | 3.72E-05 | 1.48E-04 | Under-expressed |
| SLC27A5  | -1.36 | 2.14E-04 | 6.82E-04 | Under-expressed |
| FAM114A1 | -1.37 | 1.92E-12 | 8.34E-11 | Under-expressed |
| KLF15    | -1.37 | 3.06E-06 | 1.67E-05 | Under-expressed |
| HOMER2   | -1.37 | 6.02E-05 | 2.25E-04 | Under-expressed |
| KAT2B    | -1.38 | 9.05E-16 | 8.94E-14 | Under-expressed |
| DHTKD1   | -1.38 | 2.06E-14 | 1.62E-12 | Under-expressed |
| GNE      | -1.38 | 8.89E-13 | 4.22E-11 | Under-expressed |
| SLC51A   | -1.38 | 3.31E-03 | 7.43E-03 | Under-expressed |
| KLHDC10  | -1.39 | 8.25E-14 | 5.59E-12 | Under-expressed |
| CALCRL   | -1.39 | 8.12E-11 | 2.07E-09 | Under-expressed |
| PXK      | -1.39 | 8.53E-09 | 1.07E-07 | Under-expressed |
| ACOX2    | -1.39 | 1.33E-05 | 6.01E-05 | Under-expressed |
| LMBRD2   | -1.4  | 8.26E-17 | 1.06E-14 | Under-expressed |
| TRO      | -1.4  | 2.95E-07 | 2.24E-06 | Under-expressed |
| SNED1    | -1.41 | 8.16E-17 | 1.06E-14 | Under-expressed |
| ADAMTS17 | -1.41 | 2.01E-05 | 8.60E-05 | Under-expressed |
| ACKR2    | -1.42 | 1.01E-05 | 4.73E-05 | Under-expressed |
| RSC1A1   | -1.43 | 2.64E-13 | 1.54E-11 | Under-expressed |
| DAAM2    | -1.43 | 1.23E-09 | 2.05E-08 | Under-expressed |
| COL5A3   | -1.43 | 2.22E-08 | 2.47E-07 | Under-expressed |
| INSIG1   | -1.43 | 4.27E-07 | 3.08E-06 | Under-expressed |
| ZFHX4    | -1.43 | 1.22E-06 | 7.53E-06 | Under-expressed |

|         |       |          |          |                 |
|---------|-------|----------|----------|-----------------|
| TXLNG   | -1.43 | 3.42E-06 | 1.84E-05 | Under-expressed |
| ITIH4   | -1.43 | 1.17E-04 | 4.04E-04 | Under-expressed |
| AKR7A3  | -1.43 | 7.28E-04 | 1.98E-03 | Under-expressed |
| PDE2A   | -1.44 | 8.66E-12 | 3.00E-10 | Under-expressed |
| BTNL9   | -1.44 | 4.08E-09 | 5.72E-08 | Under-expressed |
| NR3C2   | -1.46 | 3.73E-12 | 1.44E-10 | Under-expressed |
| CFHR1   | -1.46 | 2.68E-03 | 6.17E-03 | Under-expressed |
| PIK3R1  | -1.47 | 1.70E-16 | 2.09E-14 | Under-expressed |
| TLR3    | -1.47 | 2.83E-09 | 4.18E-08 | Under-expressed |
| SLC38A7 | -1.48 | 4.86E-10 | 9.36E-09 | Under-expressed |
| FAM168A | -1.48 | 4.21E-09 | 5.85E-08 | Under-expressed |
| SHPRH   | -1.48 | 3.25E-07 | 2.44E-06 | Under-expressed |
| PPP1R3B | -1.49 | 1.07E-14 | 8.86E-13 | Under-expressed |
| MDN1    | -1.49 | 1.93E-07 | 1.56E-06 | Under-expressed |
| CYP4F11 | -1.49 | 1.99E-05 | 8.55E-05 | Under-expressed |
| KDR     | -1.5  | 9.28E-15 | 7.77E-13 | Under-expressed |
| ARRDC4  | -1.5  | 4.48E-10 | 8.77E-09 | Under-expressed |
| ECM2    | -1.5  | 1.46E-09 | 2.35E-08 | Under-expressed |
| PPP4R2  | -1.5  | 7.62E-09 | 9.76E-08 | Under-expressed |
| ASXL2   | -1.5  | 2.29E-08 | 2.52E-07 | Under-expressed |
| ZBTB16  | -1.5  | 4.04E-06 | 2.14E-05 | Under-expressed |
| RAD54L2 | -1.51 | 1.82E-11 | 5.70E-10 | Under-expressed |
| CMBL    | -1.51 | 2.31E-07 | 1.82E-06 | Under-expressed |
| ADRA1B  | -1.51 | 2.40E-07 | 1.88E-06 | Under-expressed |
| REPS2   | -1.52 | 1.54E-09 | 2.44E-08 | Under-expressed |
| STRN    | -1.52 | 1.50E-08 | 1.75E-07 | Under-expressed |
| KLF9    | -1.53 | 1.01E-11 | 3.45E-10 | Under-expressed |
| PALM2   | -1.53 | 1.70E-08 | 1.94E-07 | Under-expressed |
| RSPRY1  | -1.53 | 1.83E-07 | 1.50E-06 | Under-expressed |
| ACSS3   | -1.53 | 1.48E-04 | 4.93E-04 | Under-expressed |
| F8      | -1.54 | 5.70E-15 | 5.01E-13 | Under-expressed |
| ENPEP   | -1.54 | 2.29E-11 | 7.07E-10 | Under-expressed |
| SLC16A2 | -1.54 | 1.16E-09 | 1.94E-08 | Under-expressed |
| GNA11   | -1.54 | 1.62E-08 | 1.87E-07 | Under-expressed |
| MFHAS1  | -1.54 | 4.00E-07 | 2.91E-06 | Under-expressed |
| FBP1    | -1.54 | 1.05E-05 | 4.89E-05 | Under-expressed |
| ARG1    | -1.54 | 1.45E-03 | 3.58E-03 | Under-expressed |
| PPM1L   | -1.55 | 4.02E-12 | 1.52E-10 | Under-expressed |
| SCP2    | -1.56 | 3.72E-18 | 8.15E-16 | Under-expressed |
| TMEM47  | -1.56 | 6.15E-11 | 1.63E-09 | Under-expressed |
| DIO1    | -1.56 | 2.16E-04 | 6.87E-04 | Under-expressed |
| APOC3   | -1.56 | 2.79E-03 | 6.40E-03 | Under-expressed |
| HFE     | -1.57 | 2.69E-12 | 1.10E-10 | Under-expressed |
| SPARCL1 | -1.57 | 1.65E-07 | 1.38E-06 | Under-expressed |
| ADRB2   | -1.57 | 4.34E-06 | 2.27E-05 | Under-expressed |
| RORC    | -1.58 | 1.27E-05 | 5.78E-05 | Under-expressed |
| GNMT    | -1.58 | 7.51E-04 | 2.03E-03 | Under-expressed |
| MASP1   | -1.59 | 3.59E-08 | 3.73E-07 | Under-expressed |
| C6      | -1.59 | 6.07E-05 | 2.26E-04 | Under-expressed |
| ELFN1   | -1.6  | 1.14E-06 | 7.12E-06 | Under-expressed |
| BMERB1  | -1.61 | 8.70E-15 | 7.33E-13 | Under-expressed |
| PSD3    | -1.61 | 1.18E-12 | 5.42E-11 | Under-expressed |
| RNF168  | -1.61 | 1.73E-10 | 3.88E-09 | Under-expressed |
| CES1    | -1.61 | 8.19E-05 | 2.94E-04 | Under-expressed |
| PAH     | -1.61 | 8.24E-05 | 2.96E-04 | Under-expressed |
| RNF125  | -1.62 | 1.91E-12 | 8.32E-11 | Under-expressed |
| KBTBD7  | -1.62 | 2.91E-11 | 8.66E-10 | Under-expressed |

|          |       |          |          |                 |
|----------|-------|----------|----------|-----------------|
| SEC14L2  | -1.62 | 3.27E-10 | 6.68E-09 | Under-expressed |
| RAPGEF4  | -1.63 | 3.16E-13 | 1.76E-11 | Under-expressed |
| FMO4     | -1.63 | 2.70E-10 | 5.70E-09 | Under-expressed |
| HIP1     | -1.63 | 5.01E-10 | 9.58E-09 | Under-expressed |
| MYLK     | -1.64 | 7.21E-15 | 6.20E-13 | Under-expressed |
| SLC2A10  | -1.64 | 8.39E-10 | 1.48E-08 | Under-expressed |
| ABCC11   | -1.64 | 2.55E-09 | 3.81E-08 | Under-expressed |
| AOX1     | -1.64 | 2.27E-05 | 9.57E-05 | Under-expressed |
| PHYHD1   | -1.64 | 4.40E-05 | 1.71E-04 | Under-expressed |
| SLC28A1  | -1.64 | 4.65E-05 | 1.79E-04 | Under-expressed |
| UGT2B4   | -1.67 | 5.69E-05 | 2.14E-04 | Under-expressed |
| PRKAR2A  | -1.68 | 6.12E-10 | 1.13E-08 | Under-expressed |
| MAP3K5   | -1.69 | 6.37E-12 | 2.32E-10 | Under-expressed |
| CCDC170  | -1.69 | 2.43E-08 | 2.66E-07 | Under-expressed |
| ALPL     | -1.69 | 1.85E-05 | 7.99E-05 | Under-expressed |
| APBA1    | -1.71 | 8.19E-10 | 1.45E-08 | Under-expressed |
| C4BPA    | -1.71 | 1.38E-05 | 6.21E-05 | Under-expressed |
| CFHR2    | -1.71 | 1.07E-03 | 2.75E-03 | Under-expressed |
| DENND2C  | -1.72 | 1.97E-13 | 1.21E-11 | Under-expressed |
| GATM     | -1.72 | 7.72E-11 | 1.99E-09 | Under-expressed |
| HMGN5    | -1.72 | 1.87E-08 | 2.12E-07 | Under-expressed |
| SLC41A2  | -1.74 | 4.01E-12 | 1.52E-10 | Under-expressed |
| SLCO2A1  | -1.74 | 5.55E-07 | 3.87E-06 | Under-expressed |
| CYP1B1   | -1.75 | 5.85E-09 | 7.77E-08 | Under-expressed |
| HJV      | -1.75 | 8.12E-04 | 2.17E-03 | Under-expressed |
| 8-Mar    | -1.76 | 3.76E-10 | 7.52E-09 | Under-expressed |
| MPDZ     | -1.77 | 1.11E-17 | 1.96E-15 | Under-expressed |
| BHMT2    | -1.77 | 3.09E-06 | 1.68E-05 | Under-expressed |
| CDO1     | -1.77 | 1.29E-04 | 4.40E-04 | Under-expressed |
| SHE      | -1.8  | 7.05E-15 | 6.12E-13 | Under-expressed |
| CYP4F3   | -1.8  | 5.83E-06 | 2.93E-05 | Under-expressed |
| IL6R     | -1.81 | 1.54E-11 | 4.97E-10 | Under-expressed |
| RALGAPA2 | -1.82 | 2.91E-10 | 6.01E-09 | Under-expressed |
| IGF1     | -1.82 | 3.56E-09 | 5.09E-08 | Under-expressed |
| ALDH8A1  | -1.82 | 5.21E-06 | 2.65E-05 | Under-expressed |
| APOA5    | -1.84 | 1.50E-04 | 5.00E-04 | Under-expressed |
| RASGEF1B | -1.85 | 7.93E-12 | 2.76E-10 | Under-expressed |
| TEK      | -1.87 | 3.29E-10 | 6.71E-09 | Under-expressed |
| SPATA13  | -1.87 | 2.81E-08 | 3.01E-07 | Under-expressed |
| PCK1     | -1.87 | 2.00E-04 | 6.46E-04 | Under-expressed |
| SDS      | -1.87 | 3.22E-04 | 9.73E-04 | Under-expressed |
| PON1     | -1.88 | 3.72E-05 | 1.48E-04 | Under-expressed |
| ACSL1    | -1.89 | 1.59E-12 | 7.14E-11 | Under-expressed |
| EHHADH   | -1.89 | 3.85E-12 | 1.48E-10 | Under-expressed |
| MICU3    | -1.91 | 1.02E-10 | 2.51E-09 | Under-expressed |
| ERN1     | -1.92 | 5.29E-11 | 1.46E-09 | Under-expressed |
| HMGCS2   | -1.92 | 1.43E-05 | 6.40E-05 | Under-expressed |
| ZKSCAN8  | -1.93 | 5.34E-07 | 3.73E-06 | Under-expressed |
| ALDH6A1  | -1.94 | 2.41E-13 | 1.43E-11 | Under-expressed |
| AUTS2    | -1.94 | 1.41E-11 | 4.58E-10 | Under-expressed |
| ANO1     | -1.94 | 1.08E-09 | 1.83E-08 | Under-expressed |
| ABCB4    | -1.95 | 5.62E-08 | 5.43E-07 | Under-expressed |
| UGT2B15  | -1.95 | 1.55E-05 | 6.85E-05 | Under-expressed |
| GPD1     | -1.96 | 1.27E-07 | 1.10E-06 | Under-expressed |
| ACSM2A   | -1.96 | 1.02E-05 | 4.78E-05 | Under-expressed |
| ABAT     | -1.97 | 1.03E-12 | 4.81E-11 | Under-expressed |
| PDK4     | -1.98 | 8.01E-11 | 2.05E-09 | Under-expressed |

|           |       |          |          |                 |
|-----------|-------|----------|----------|-----------------|
| CTH       | -1.98 | 1.82E-09 | 2.83E-08 | Under-expressed |
| ZNF281    | -1.99 | 2.33E-10 | 5.02E-09 | Under-expressed |
| ALDOB     | -1.99 | 7.88E-05 | 2.85E-04 | Under-expressed |
| MYRIP     | -2    | 1.28E-05 | 5.81E-05 | Under-expressed |
| APOC4     | -2    | 2.67E-04 | 8.24E-04 | Under-expressed |
| G6PC      | -2.02 | 8.12E-06 | 3.91E-05 | Under-expressed |
| CPS1      | -2.03 | 4.78E-04 | 1.37E-03 | Under-expressed |
| DPYS      | -2.04 | 7.36E-06 | 3.59E-05 | Under-expressed |
| SLC46A3   | -2.05 | 1.11E-13 | 7.20E-12 | Under-expressed |
| SERPINC1  | -2.05 | 1.05E-04 | 3.65E-04 | Under-expressed |
| RETREG1   | -2.08 | 9.87E-07 | 6.31E-06 | Under-expressed |
| LIPG      | -2.09 | 1.11E-10 | 2.68E-09 | Under-expressed |
| ADAMTSL3  | -2.09 | 3.59E-08 | 3.73E-07 | Under-expressed |
| SLC38A4   | -2.1  | 1.36E-06 | 8.26E-06 | Under-expressed |
| NCOA2     | -2.11 | 1.04E-09 | 1.77E-08 | Under-expressed |
| IRF6      | -2.11 | 6.88E-08 | 6.47E-07 | Under-expressed |
| GHR       | -2.12 | 1.72E-11 | 5.45E-10 | Under-expressed |
| MFAP3L    | -2.12 | 1.48E-10 | 3.40E-09 | Under-expressed |
| RDH16     | -2.12 | 2.02E-06 | 1.17E-05 | Under-expressed |
| USP12     | -2.15 | 1.07E-11 | 3.62E-10 | Under-expressed |
| UHMK1     | -2.17 | 5.85E-13 | 2.87E-11 | Under-expressed |
| FNIP2     | -2.19 | 4.91E-13 | 2.52E-11 | Under-expressed |
| NFIC      | -2.2  | 1.57E-12 | 7.08E-11 | Under-expressed |
| DMGDH     | -2.24 | 3.20E-09 | 4.64E-08 | Under-expressed |
| HACD2     | -2.24 | 2.31E-08 | 2.54E-07 | Under-expressed |
| HIPK3     | -2.27 | 1.93E-09 | 2.98E-08 | Under-expressed |
| BHMT      | -2.27 | 3.54E-06 | 1.89E-05 | Under-expressed |
| GOLIM4    | -2.28 | 2.36E-10 | 5.07E-09 | Under-expressed |
| PPTC7     | -2.28 | 2.13E-09 | 3.26E-08 | Under-expressed |
| AQP9      | -2.28 | 3.92E-06 | 2.08E-05 | Under-expressed |
| FRRS1     | -2.31 | 5.65E-10 | 1.06E-08 | Under-expressed |
| UPB1      | -2.31 | 2.03E-06 | 1.17E-05 | Under-expressed |
| ABCC9     | -2.34 | 7.44E-16 | 7.56E-14 | Under-expressed |
| ADH4      | -2.36 | 2.95E-04 | 9.02E-04 | Under-expressed |
| CPED1     | -2.4  | 3.04E-14 | 2.31E-12 | Under-expressed |
| TDO2      | -2.4  | 7.88E-08 | 7.27E-07 | Under-expressed |
| FMO3      | -2.43 | 5.62E-08 | 5.43E-07 | Under-expressed |
| HRG       | -2.45 | 1.24E-05 | 5.65E-05 | Under-expressed |
| LINC01554 | -2.49 | 6.44E-06 | 3.20E-05 | Under-expressed |
| ACSM5     | -2.51 | 1.31E-10 | 3.09E-09 | Under-expressed |
| ABCA6     | -2.52 | 2.30E-09 | 3.48E-08 | Under-expressed |
| HSD17B6   | -2.52 | 9.09E-09 | 1.13E-07 | Under-expressed |
| SLC1A1    | -2.52 | 7.00E-08 | 6.57E-07 | Under-expressed |
| FNDC5     | -2.56 | 6.24E-09 | 8.22E-08 | Under-expressed |
| SLC6A1    | -2.57 | 2.33E-12 | 9.72E-11 | Under-expressed |
| IL6ST     | -2.6  | 5.63E-11 | 1.53E-09 | Under-expressed |
| CHI3L1    | -2.61 | 2.01E-06 | 1.16E-05 | Under-expressed |
| ADH1B     | -2.63 | 4.05E-07 | 2.94E-06 | Under-expressed |
| ADH1C     | -2.86 | 3.60E-06 | 1.93E-05 | Under-expressed |
| GPLD1     | -2.97 | 9.48E-13 | 4.45E-11 | Under-expressed |
| CYP2C8    | -3.06 | 1.04E-09 | 1.77E-08 | Under-expressed |
| GFRA1     | -3.11 | 6.76E-09 | 8.80E-08 | Under-expressed |
| CYP8B1    | -3.27 | 1.91E-08 | 2.16E-07 | Under-expressed |
| SLC22A1   | -3.54 | 7.44E-11 | 1.92E-09 | Under-expressed |
| HSD11B1   | -3.61 | 4.34E-11 | 1.22E-09 | Under-expressed |
| TAT       | -3.75 | 7.42E-12 | 2.62E-10 | Under-expressed |

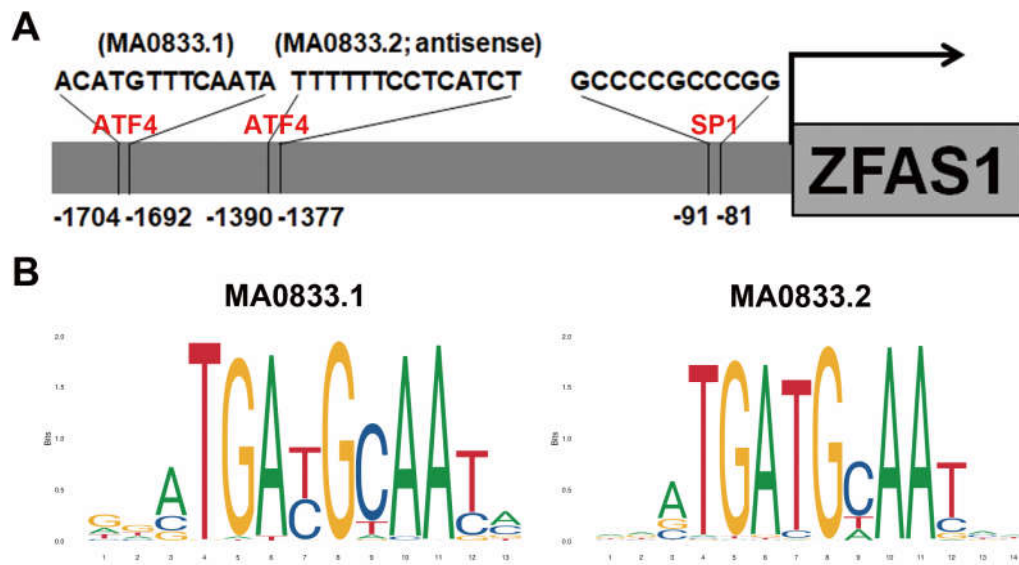

**Figure S1.** The predicted ATF4-binding sites on ZFAS1 promoter. **(A)** The potential ATF4-binding sites on ZFAS1 promoter at the region -1 to -2000 were predicted using the JASPAR database (<http://jaspar.genereg.net/>). Default setting was used. A previously identified SP1-binding site on ZFAS1 promoter was also shown. **(B)** The sequence logos for two ATF4- binding sites used for prediction.
